# Supplementary material for: Research artifacts and citations in computer systems papers
Source: PeerJ journal article supplement (doi:10.7717/peerj-cs.887), 2022-02-07
Supplement: artifact-SI.tbz2 [file artifact-SI.tbz2]

## Sheet: ESTIMATES
United Nations
Population Division
Department of Economic and Social Affairs
World Population Prospects: The 2017 Revision
File POP/1-1: Total population (both sexes combined) by region, subregion and country, annually for 1950-2100 (thousands)
Estimates, 1950 - 2015
POP/DB/WPP/Rev.2017/POP/F01-1
June 2017 - Copyright © 2017 by United Nations. All rights reserved
Suggested citation: United Nations, Department of Economic and Social Affairs, Population Division (2017). World Population Prospects: The 2017 Revision, DVD Edition.
					Total population, both sexes combined, as of 1 July (thousands)
Index	Variant	Region, subregion, country or area *	Notes	Country code	1950	1951	1952	1953	1954	1955	1956	1957	1958	1959	1960	1961	1962	1963	1964	1965	1966	1967	1968	1969	1970	1971	1972	1973	1974	1975	1976	1977	1978	1979	1980	1981	1982	1983	1984	1985	1986	1987	1988	1989	1990	1991	1992	1993	1994
1	Estimates	WORLD		900	2.53627e+06	2.58382e+06	2.63058e+06	2.67723e+06	2.7243e+06	2.77224e+06	2.82138e+06	2.87195e+06	2.92408e+06	2.97782e+06	3.03321e+06	3.09031e+06	3.14924e+06	3.21027e+06	3.27367e+06	3.33959e+06	3.40812e+06	3.47905e+06	3.55188e+06	3.62591e+06	3.70058e+06	3.77579e+06	3.85155e+06	3.92754e+06	4.00345e+06	4.07909e+06	4.15429e+06	4.2292e+06	4.30438e+06	4.38059e+06	4.45841e+06	4.53785e+06	4.61878e+06	4.70153e+06	4.78648e+06	4.87378e+06	4.96363e+06	5.05564e+06	5.14856e+06	5.24074e+06	5.33094e+06	5.41876e+06	5.5044e+06	5.58809e+06	5.67032e+06
2	Estimates	More developed regions	a	901	814865	824213	834074	844264	854632	865069	875507	885914	896292	906668	917068	927485	937859	948065	957942	967381	976313	984784	992939	1.00099e+06	1.00908e+06	1.01727e+06	1.02551e+06	1.0337e+06	1.0417e+06	1.04941e+06	1.05682e+06	1.06396e+06	1.07088e+06	1.07762e+06	1.08424e+06	1.09073e+06	1.09708e+06	1.10336e+06	1.10963e+06	1.11594e+06	1.12231e+06	1.12873e+06	1.13507e+06	1.1412e+06	1.147e+06	1.15245e+06	1.15759e+06	1.16243e+06	1.167e+06
3	Estimates	Less developed regions	b	902	1.72141e+06	1.7596e+06	1.79651e+06	1.83297e+06	1.86967e+06	1.90717e+06	1.94588e+06	1.98604e+06	2.02779e+06	2.07116e+06	2.11614e+06	2.16282e+06	2.21138e+06	2.26221e+06	2.31573e+06	2.37221e+06	2.43181e+06	2.49427e+06	2.55894e+06	2.62492e+06	2.6915e+06	2.75852e+06	2.82603e+06	2.89384e+06	2.96175e+06	3.02967e+06	3.09747e+06	3.16524e+06	3.2335e+06	3.30296e+06	3.37417e+06	3.44711e+06	3.52169e+06	3.59817e+06	3.67686e+06	3.75785e+06	3.84132e+06	3.92691e+06	4.01349e+06	4.09954e+06	4.18394e+06	4.2663e+06	4.34681e+06	4.42567e+06	4.50332e+06
4	Estimates	Least developed countries	c	941	195259	199052	202905	206885	211045	215421	220033	224885	229967	235259	240742	246406	252264	258353	264722	271401	278420	285752	293293	300903	308486	316005	323507	331095	338920	347093	355654	364581	373854	383430	393279	403409	413847	424614	435738	447241	459116	471365	484033	497177	510828	525020	539720	554804	570102
5	Estimates	Less developed regions, excluding least developed countries	d	934	1.52615e+06	1.56055e+06	1.59361e+06	1.62608e+06	1.65863e+06	1.69175e+06	1.72584e+06	1.76115e+06	1.79782e+06	1.8359e+06	1.8754e+06	1.91641e+06	1.95912e+06	2.00385e+06	2.05101e+06	2.10081e+06	2.15339e+06	2.20852e+06	2.26565e+06	2.32401e+06	2.38301e+06	2.44251e+06	2.50253e+06	2.56274e+06	2.62283e+06	2.68258e+06	2.74181e+06	2.80066e+06	2.85964e+06	2.91953e+06	2.98089e+06	3.04371e+06	3.10785e+06	3.17356e+06	3.24112e+06	3.31061e+06	3.3822e+06	3.45554e+06	3.52945e+06	3.60236e+06	3.67312e+06	3.74128e+06	3.80709e+06	3.87086e+06	3.93322e+06
6	Estimates	Less developed regions, excluding China		948	1.1572e+06	1.17984e+06	1.20396e+06	1.2295e+06	1.2564e+06	1.28464e+06	1.31415e+06	1.34493e+06	1.37693e+06	1.41013e+06	1.44452e+06	1.48008e+06	1.51677e+06	1.55457e+06	1.59342e+06	1.63331e+06	1.67421e+06	1.71613e+06	1.75906e+06	1.80298e+06	1.84789e+06	1.89381e+06	1.94075e+06	1.98873e+06	2.03781e+06	2.08802e+06	2.13932e+06	2.19175e+06	2.24545e+06	2.30063e+06	2.35742e+06	2.41584e+06	2.47578e+06	2.53702e+06	2.59925e+06	2.66223e+06	2.72586e+06	2.79011e+06	2.85482e+06	2.91984e+06	2.98506e+06	3.05039e+06	3.11581e+06	3.18128e+06	3.24683e+06
7	Estimates	High-income countries	e	1503	672896	680630	688859	697440	706262	715241	724325	733490	742738	752088	761558	771140	780783	790384	799810	808971	817809	826350	834692	842981	851319	859743	868206	876629	884893	892915	900676	908209	915558	922784	929939	937035	944069	951063	958039	965013	971995	978991	986007	993046	1.00011e+06	1.00721e+06	1.01435e+06	1.02148e+06	1.02858e+06
8	Estimates	Middle-income countries	e	1517	1.73448e+06	1.77239e+06	1.80889e+06	1.84473e+06	1.88056e+06	1.91689e+06	1.95412e+06	1.99252e+06	2.03225e+06	2.07337e+06	2.11593e+06	2.16001e+06	2.2058e+06	2.2536e+06	2.30376e+06	2.35649e+06	2.41192e+06	2.46984e+06	2.52966e+06	2.59059e+06	2.652e+06	2.71376e+06	2.77592e+06	2.83824e+06	2.90053e+06	2.96268e+06	3.02453e+06	3.08621e+06	3.14822e+06	3.2113e+06	3.27599e+06	3.34226e+06	3.40997e+06	3.47938e+06	3.55075e+06	3.62414e+06	3.69974e+06	3.77715e+06	3.85509e+06	3.93188e+06	4.00628e+06	4.07782e+06	4.14673e+06	4.21336e+06	4.27838e+06
9	Estimates	Upper-middle-income countries	e	1502	956204	980195	1.00188e+06	1.02205e+06	1.0414e+06	1.06047e+06	1.07965e+06	1.09923e+06	1.11937e+06	1.14013e+06	1.16155e+06	1.18372e+06	1.20683e+06	1.23123e+06	1.25733e+06	1.28537e+06	1.31547e+06	1.34743e+06	1.38066e+06	1.41437e+06	1.44795e+06	1.48126e+06	1.5143e+06	1.5468e+06	1.57848e+06	1.60917e+06	1.63871e+06	1.66723e+06	1.69514e+06	1.72305e+06	1.75143e+06	1.78022e+06	1.8094e+06	1.83938e+06	1.8707e+06	1.90361e+06	1.9384e+06	1.97468e+06	2.01128e+06	2.04658e+06	2.07941e+06	2.10937e+06	2.13673e+06	2.16187e+06	2.18546e+06
10	Estimates	Lower-middle-income countries	e	1501	778277	792199	807013	822677	839156	856427	874473	893289	912874	933236	954378	976297	998971	1.02236e+06	1.04643e+06	1.07112e+06	1.09645e+06	1.12241e+06	1.149e+06	1.17621e+06	1.20405e+06	1.2325e+06	1.26161e+06	1.29143e+06	1.32204e+06	1.35351e+06	1.38582e+06	1.41897e+06	1.45308e+06	1.48825e+06	1.52456e+06	1.56203e+06	1.60057e+06	1.64e+06	1.68005e+06	1.72053e+06	1.76134e+06	1.80247e+06	1.84382e+06	1.88531e+06	1.92687e+06	1.96844e+06	2.01e+06	2.05149e+06	2.09292e+06
11	Estimates	Low-income countries	e	1500	128097	129969	131992	134194	136594	139196	141995	144972	148099	151342	154670	158069	161550	165151	168931	172930	177159	181602	186232	191011	195911	200923	206054	211296	216646	222102	227670	233353	239139	245012	250969	257009	263158	269481	276058	282953	290181	297744	305666	313976	322686	331828	341387	351272	361356
12	Estimates	Sub-Saharan Africa	f	947	179621	183039	186626	190378	194295	198380	202635	207066	211680	216485	221490	226701	232121	237752	243590	249639	255903	262392	269115	276084	283310	290798	298556	306607	314975	323681	332734	342134	351872	361934	372310	382995	393994	405308	416943	428900	441183	453787	466695	479881	493329	507040	521026	535302	549889
13	Estimates	AFRICA		903	228670	233277	238113	243178	248471	253995	259750	265739	271965	278432	285142	292100	299309	306772	314491	322471	330720	339248	348050	357120	366459	376067	385965	396199	406828	417898	429425	441404	453835	466707	480012	493748	507910	522486	537454	552796	568506	584569	600957	617632	634567	651763	669221	686917	704821
14	Estimates	Eastern Africa		910	66758.3	68208.4	69711.5	71272.4	72895.7	74585.8	76347	78183.4	80099	82097.5	84182.5	86356.9	88623.6	90984.6	93441.8	95996.7	98653.2	101413	104275	107235	110292	113445	116700	120068	123566	127204	130990	134922	138994	143195	147519	151952	156500	161189	166056	171123	176422	181929	187549	193150	198646	203991	209239	214536	220082
15	Estimates	Burundi		108	2308.92	2359.12	2403.51	2445.42	2487.39	2531.18	2577.74	2627.23	2679.14	2732.44	2786.11	2839.67	2893.67	2949.93	3010.86	3077.88	3152.72	3234.02	3316.23	3391.75	3455.61	3505.39	3544.05	3578.49	3618.59	3671.49	3739.66	3821.19	3913.77	4013.31	4116.82	4223.19	4333.39	4448.73	4571.29	4702.07	4841.56	4987.74	5135.96	5280.02	5415.41	5542.05	5661.14	5771.4	5871.61
16	Estimates	Comoros		174	159.459	163.139	166.541	169.752	172.853	175.903	178.946	181.992	185.043	188.097	191.121	194.139	197.198	200.372	203.753	207.424	211.478	215.897	220.575	225.325	230.054	234.644	239.235	244.208	250.104	257.29	265.953	275.9	286.634	297.447	307.829	317.606	326.946	336.096	345.466	355.337	365.76	376.654	387.963	399.632	411.594	423.872	436.448	449.274	462.277
17	Estimates	Djibouti		262	62.001	63.306	64.75	66.269	67.872	69.589	71.497	73.702	76.353	79.612	83.636	88.498	94.204	100.628	107.583	114.963	122.866	131.397	140.462	149.887	159.659	169.372	179.224	190.568	205.181	224.183	248.556	277.479	308.008	336.085	358.96	374.937	385.271	393.802	406.017	425.613	454.361	490.33	528.999	563.864	590.398	606.844	615.054	618.495	622.366
18	Estimates	Eritrea		232	1142.15	1159.8	1179.54	1201.12	1224.38	1249.19	1275.53	1303.42	1332.95	1364.28	1397.49	1432.64	1469.64	1508.27	1548.19	1589.18	1631.15	1674.2	1718.53	1764.34	1811.88	1861.2	1912.3	1965.16	2019.72	2075.97	2133.72	2193.07	2254.45	2318.49	2385.54	2454.77	2525.52	2598.41	2674.29	2753.15	2837.11	2924.35	3006.36	3071.77	3113.31	3127.3	3118.58	3099.05	3085.44
19	Estimates	Ethiopia		231	18128	18467	18819.7	19184.3	19560	19947.3	20347.8	20764.5	21201	21662	22151.3	22671.2	23221.4	23798.4	24397	25013.6	25641.4	26281.2	26946.1	27654.2	28415.1	29245.2	30132.6	31025.1	31851.7	32566.8	33146.9	33622.4	34068.3	34590.2	35264.9	36120.3	37136.8	38285.9	39518.8	40800.3	42120.7	43493.3	44932.1	46458.9	48086.5	49821.1	51647.8	53533	55431.1
20	Estimates	Kenya		404	6076.76	6240.16	6412.36	6593.11	6782.29	6979.93	7186.21	7401.42	7625.99	7860.48	8105.44	8361.44	8628.97	8908.42	9200.16	9504.7	9822.5	10154.5	10502.2	10867.7	11252.5	11657.5	12083.2	12529.9	12997.6	13486.6	13996.7	14528.3	15083	15662.9	16269	16901.7	17559.4	18239.4	18937.7	19651.2	20378.6	21119.3	21871.4	22633	23402.5	24179.6	24964	25754.1	26548.5
21	Estimates	Madagascar		450	4083.55	4168.39	4256.77	4348.72	4444.29	4543.54	4646.58	4753.52	4864.52	4979.75	5099.37	5223.57	5352.5	5486.32	5625.16	5769.22	5918.6	6073.53	6234.47	6401.92	6576.31	6757.85	6946.62	7142.63	7345.78	7556.03	7773.45	7998.16	8230.22	8469.67	8716.55	8971.34	9234.13	9504.28	9780.87	10063.5	10352.1	10647.8	10952.4	11268.7	11598.6	11942.8	12301.3	12675.5	13066.5
22	Estimates	Malawi		454	2953.87	3008.07	3065.03	3124.73	3187.17	3252.33	3320.22	3390.8	3464.05	3539.97	3618.59	3700.02	3784.44	3872.12	3963.42	4058.67	4158.12	4262.01	4370.65	4484.44	4603.72	4728.7	4859.61	4996.94	5141.2	5292.81	5454.7	5627.53	5806.85	5986.33	6163.08	6327.57	6484.45	6661.36	6895.93	7211.1	7625.31	8120.09	8636.93	9094.67	9437.55	9641.15	9729.72	9755.86	9796.98
23	Estimates	Mauritius	1	480	493.255	506.433	521.188	537.047	553.626	570.648	587.952	605.487	623.276	641.428	660.023	679.045	698.303	717.415	735.86	753.285	769.553	784.78	799.136	812.946	826.441	839.598	852.4	865.169	878.355	892.211	906.929	922.32	937.821	952.588	966.031	978.069	988.892	998.631	1007.5	1015.76	1023.28	1030.18	1037.26	1045.59	1055.87	1068.44	1082.96	1098.59	1114.14
24	Estimates	Mayotte		175	15.141	15.728	16.443	17.249	18.094	18.985	19.901	20.84	21.832	22.882	24.015	25.241	26.535	27.879	29.219	30.526	31.783	33.01	34.251	35.554	36.969	38.513	40.196	41.955	43.734	45.483	47.186	48.892	50.698	52.746	55.137	57.907	61.039	64.491	68.201	72.104	76.184	80.448	84.946	89.707	94.784	100.166	105.827	111.643	117.462
25	Estimates	Mozambique		508	6152.24	6248.72	6352.58	6463.09	6579.63	6701.75	6829.09	6961.49	7098.86	7241.23	7388.69	7541.32	7699.14	7862.07	8030.02	8203.08	8381.45	8565.67	8756.48	8954.81	9161.53	9375.14	9595.76	9827.58	10076.2	10344.5	10632.9	10936.9	11248	11555	11848.3	12133.1	12409.2	12657.7	12853.8	12984.4	13034.4	13020.9	13002.6	13059.6	13247.6	13592	14071.2	14637	15217
26	Estimates	Réunion		638	248.11	259.295	268.486	276.526	284.08	291.658	299.571	307.979	316.879	326.167	335.693	345.405	355.429	366.078	377.791	390.775	405.29	420.988	436.69	450.74	462.025	470.119	475.473	478.91	481.689	484.777	488.349	492.286	496.911	502.5	509.265	517.413	526.949	537.4	548.141	558.699	568.917	578.938	588.986	599.454	610.582	622.418	634.793	647.588	660.563
27	Estimates	Rwanda		646	2186.18	2250.68	2313.31	2378.45	2448.82	2525.53	2607.95	2693.82	2779.55	2860.69	2933.43	2996.1	3050.6	3102.97	3161.72	3232.93	3319.08	3418.32	3527.26	3640.59	3754.54	3868.34	3983.7	4102.32	4226.8	4359.09	4499.51	4647.61	4803.73	4968.07	5140.72	5315.03	5489.32	5673.61	5881.91	6120.11	6407.67	6732.13	7030.18	7216.03	7235.8	7051.76	6701.85	6299.91	6005.1
28	Estimates	Seychelles		690	36.325	36.881	37.437	37.964	38.455	38.909	39.334	39.769	40.254	40.826	41.54	42.4	43.406	44.511	45.649	46.772	47.852	48.914	49.988	51.128	52.365	53.707	55.127	56.606	58.097	59.59	61.061	62.5	63.878	65.153	66.294	67.298	68.168	68.909	69.459	69.836	70.004	70.014	69.99	70.144	70.624	71.5	72.712	74.114	75.491
29	Estimates	Somalia		706	2264.08	2307.67	2351.93	2397.16	2443.62	2491.52	2540.99	2592.13	2644.99	2699.59	2755.95	2814.1	2874.19	2936.44	3001.13	3068.44	3143.84	3228.49	3313.79	3387.63	3444.55	3470.32	3475.02	3506.01	3627.5	3880.32	4289.47	4827.36	5417.74	5953.61	6359.13	6604.87	6716.45	6740.22	6747.93	6791.72	6887.37	7018.11	7165.3	7298.42	7397.35	7455.94	7488.54	7519.81	7583.95
30	Estimates	South Sudan		728	2582.93	2601.65	2625.13	2653.1	2685.32	2721.54	2761.54	2805.11	2852.02	2902.08	2955.15	3011.11	3069.91	3131.56	3196.11	3263.64	3334.19	3407.8	3484.54	3564.47	3647.71	3734.42	3824.76	3918.92	4017.07	4119.44	4224.53	4332.29	4445.83	4569.42	4705.22	4853.93	5011.73	5170.56	5319.61	5450.42	5565.55	5666.08	5741.23	5777.5	5768.48	5705.38	5599.81	5490.91	5431.74
31	Estimates	Uganda		800	5158.19	5308.67	5455.54	5601.24	5748.21	5898.84	6055.52	6220.63	6396.46	6585.1	6788.21	7006.63	7240.17	7487.43	7746.2	8014.4	8292.78	8580.68	8872.92	9162.83	9446.06	9720.4	9988.38	10256.4	10533.7	10827.1	11139.8	11470.9	11818.3	12178.5	12549.5	12930.2	13323.3	13735.3	14174.5	14646.6	15154.5	15695.4	16262.5	16846.1	17438.9	18040.4	18652.9	19275.4	19907.6
32	Estimates	United Republic of Tanzania	2	834	7649.76	7847.31	8055.91	8274.75	8503.22	8740.99	8987.98	9244.35	9510.51	9787.03	10074.5	10373.4	10683.9	11005.9	11339.1	11683.5	12038.9	12406	12787.5	13186.6	13605.5	14045.8	14506.6	14985.1	15477.3	15980.3	16493.3	17017.7	17555.5	18109.9	18683.2	19277.1	19891.5	20524.7	21173.6	21837	22511.2	23198.5	23910	24660.6	25459.6	26315	27219.6	28149.3	29070.6
33	Estimates	Zambia		894	2310.44	2366.63	2427.99	2493.51	2562.48	2634.46	2709.36	2787.34	2868.84	2954.48	3044.85	3140.26	3240.59	3345.14	3452.94	3563.41	3676.19	3791.89	3912.09	4038.92	4173.93	4317.75	4469.9	4629.4	4794.75	4964.83	5139.03	5317.63	5501.44	5691.75	5889.23	6094.21	6305.71	6521.54	6738.77	6955.21	7170.66	7385.69	7600.07	7813.81	8027.25	8239.73	8452.27	8669.17	8896.11
34	Estimates	Zimbabwe		716	2746.85	2829.75	2917.37	3008.93	3103.9	3202.01	3303.26	3407.91	3516.4	3629.36	3747.37	3870.76	3999.42	4132.76	4269.86	4410.21	4553.43	4700.04	4851.43	5009.51	5175.62	5351.19	5535.87	5727.04	5920.94	6115.37	6308.3	6501.89	6703.18	6921.79	7164.17	7431.94	7721.54	8027.56	8342.19	8658.86	8976.2	9293.28	9604.3	9902.54	10183.1	10443	10682.9	10905.8	11116.9
35	Estimates	Middle Africa		911	26453.8	26964.6	27490	28032	28592.6	29173.4	29776.2	30402	31052.1	31727.3	32428.8	33157.3	33914.2	34700.8	35518.5	36368.4	37252.7	38172	39124.8	40108.4	41121.9	42164.6	43239.4	44353	45514.2	46729.6	48002.9	49333.4	50716.6	52145.9	53616.9	55133.2	56699.5	58314.6	59977.1	61688.7	63437.7	65231.3	67111.1	69133	71331.3	73736.6	76324	79005.1	81656.7
36	Estimates	Angola		24	4548.02	4659.33	4774.56	4890.47	5004.76	5116.07	5224	5329.1	5432.72	5536.78	5643.18	5753.02	5866.06	5980.42	6093.32	6203.3	6309.77	6414.99	6523.79	6642.63	6776.38	6927.27	7094.83	7277.96	7474.34	7682.48	7901	8130.99	8376.15	8641.52	8929.9	9244.51	9582.16	9931.56	10277.3	10609	10921	11218.3	11514	11827.2	12171.4	12553.4	12968.3	13403.7	13841.3
37	Estimates	Cameroon		120	4307.02	4382.93	4460.32	4539.44	4620.63	4704.23	4790.71	4880.59	4974.43	5072.8	5176.27	5285.23	5399.92	5520.33	5646.32	5777.83	5915.12	6058.54	6208.28	6364.57	6527.64	6697.74	6875.23	7060.6	7254.47	7457.36	7669.44	7890.97	8122.53	8364.83	8618.35	8883.02	9158.57	9445	9742.26	10050	10368.3	10696.3	11031.8	11372.2	11715.2	12060.7	12408.9	12758.9	13109.7
38	Estimates	Central African Republic		140	1326.65	1339.84	1353.47	1367.8	1383.07	1399.49	1417.22	1436.39	1457.11	1479.47	1503.51	1529.23	1556.66	1585.76	1616.52	1648.83	1682.88	1718.6	1755.34	1792.22	1828.71	1864.6	1900.32	1936.84	1975.52	2017.37	2062.41	2110.46	2162.25	2218.57	2279.82	2346.8	2418.84	2493.14	2565.8	2634.23	2696.98	2755.24	2812.24	2872.67	2939.78	3014.62	3095.81	3181.22	3267.67
39	Estimates	Chad		148	2502.32	2543.9	2588.91	2636.26	2685.2	2735.21	2786.05	2837.76	2890.64	2945.1	3001.59	3060.36	3121.22	3183.55	3246.51	3309.57	3372.17	3434.81	3499.35	3568.38	3643.55	3726.09	3815.1	3907.63	3999.51	4087.95	4172.23	4253.99	4335.65	4420.72	4512.04	4610.17	4715.2	4829.09	4954.05	5091.53	5243.01	5408.09	5584.34	5768.09	5956.86	6150.08	6349.09	6555.6	6772.13
40	Estimates	Congo		178	827.252	844.004	861.706	880.318	899.822	920.218	941.536	963.824	987.142	1011.58	1037.22	1064.11	1092.29	1121.73	1152.41	1184.32	1217.39	1251.7	1287.52	1325.15	1364.81	1406.64	1450.52	1496.05	1542.69	1590.04	1637.94	1686.52	1736.1	1787.13	1839.93	1894.68	1951.19	2009.16	2068.13	2127.77	2188.05	2249.15	2311.35	2375.01	2440.46	2507.77	2577.03	2648.51	2722.5
41	Estimates	Democratic Republic of the Congo		180	12183.7	12428.8	12680.9	12944.4	13222.5	13517.5	13830.4	14161.2	14508.9	14871.8	15248.3	15637.7	16041.3	16461.9	16903.9	17369.9	17861.9	18378.2	18913.2	19458.9	20009.9	20562.9	21120.1	21689.2	22280.9	22902.3	23559.1	24247.5	24954.7	25661.9	26357.5	27039.5	27717.3	28404.9	29121.5	29883.4	30685.8	31529.8	32444.2	33465.4	34614.6	35914.8	37346.1	38833.6	40273.7
42	Estimates	Equatorial Guinea		226	225.537	230.717	233.853	235.883	237.547	239.375	241.67	244.553	247.932	251.601	255.323	258.947	262.59	266.598	271.457	277.396	284.868	293.44	301.353	306.233	306.515	301.666	292.585	281.021	269.426	259.747	252.194	246.677	244.485	247.078	255.325	270.063	290.617	314.475	338.086	358.896	376.024	390.173	402.326	414.138	426.846	440.624	455.148	470.61	487.14
43	Estimates	Gabon		266	473.298	475.865	477.711	479.237	480.767	482.56	484.782	487.536	490.87	494.751	499.184	504.167	509.806	516.265	523.789	532.511	542.557	553.823	565.873	578.108	590.118	601.731	613.123	624.621	636.696	649.716	663.77	678.774	694.732	711.533	729.159	747.587	766.855	787.013	808.083	830.085	853.027	876.863	901.458	926.622	952.212	978.223	1004.68	1031.5	1058.66
44	Estimates	Sao Tome and Principe		678	60.002	59.202	58.523	58.165	58.234	58.783	59.746	60.991	62.319	63.478	64.253	64.551	64.432	64.177	64.212	64.796	66.063	67.873	70.046	72.241	74.253	75.988	77.537	79.022	80.67	82.607	84.885	87.434	90.089	92.649	94.949	96.95	98.706	100.318	101.915	103.634	105.474	107.415	109.47	111.627	113.893	116.294	118.816	121.407	123.973
45	Estimates	Northern Africa		912	49048.9	50237.9	51487.6	52800.1	54176.1	55615.1	57115.1	58673.2	60285.2	61946.2	63651.9	65399.3	67188.1	69020.5	70901	72831.7	74817.5	76856.3	78935	81035.9	83148.8	85269.4	87408.9	89592.1	91852.9	94217.2	96690.5	99270.1	101962	104773	107703	110753	113917	117177	120510	123897	127323	130782	134262	137751	141238	144724	148196	151615	154932
46	Estimates	Algeria		12	8872.25	9039.91	9216.4	9405.44	9609.5	9829.72	10065.8	10316.3	10578.4	10849	11124.9	11404.9	11690.2	11985.1	12296	12627	12980.3	13354.2	13744.4	14144.4	14550	14960.1	15377.1	15804.4	16247.1	16709.1	17190.2	17690.2	18212.3	18760.8	19337.7	19943.7	20575.7	21228.3	21893.9	22565.9	23241.3	23917.9	24591.5	25257.7	25912.4	26554.3	27181.1	27786.3	28362.3
47	Estimates	Egypt		818	20713.3	21215	21746.8	22309.1	22901.6	23523.4	24172.9	24847.8	25545.5	26262.7	26996.5	27744.7	28506.2	29281.2	30071.1	30876	31697.6	32534	33377.3	34216.8	35046.3	35863.4	36673.6	37488.1	38322	39187.7	40089	41026.5	42004.7	43027.8	44099.1	45216.5	46379.6	47594.6	48869	50205	51607.7	53066.2	54547.3	56006.6	57412.2	58752.4	60035.5	61275.6	62495.7
48	Estimates	Libya		434	1124.52	1142.97	1163.89	1187.73	1214.83	1245.36	1279.41	1316.91	1357.73	1401.62	1448.42	1498.07	1550.81	1607.17	1667.83	1733.31	1803.68	1878.88	1958.91	2043.82	2133.53	2228.15	2327.49	2430.76	2536.89	2645.14	2754.7	2865.64	2979.09	3096.73	3219.47	3347.78	3480.45	3614.69	3746.72	3873.78	3994.59	4109.7	4220.42	4328.91	4436.66	4544.29	4651	4755.29	4855
49	Estimates	Morocco		504	8985.99	9242.8	9528.26	9836.53	10162.7	10502.7	10853.3	11212.4	11578.6	11950.8	12328.5	12710.5	13094.8	13478.2	13857.1	14229	14593.3	14950.8	15302.9	15651.9	16000	16347.2	16695	17049.2	17417	17803.7	18210.8	18637	19081.7	19543.3	20019.8	20511.6	21016.8	21528.5	22037.6	22537.4	23023.9	23497.8	23961.8	24421.2	24879.1	25336.9	25791.5	26237.4	26667
50	Estimates	Sudan		729	5733.79	5884.66	6041.32	6204.1	6373.31	6549.3	6732.44	6923.11	7121.74	7328.72	7544.49	7769.48	8004.12	8248.81	8503.99	8770.1	9047.8	9337.66	9639.84	9954.41	10281.7	10621.5	10974.6	11343.9	11733	12144.1	12578.4	13034.6	13510.4	14002.3	14507.5	15027.3	15562.2	16107.7	16658.1	17210.2	17757.2	18302.6	18866.3	19475.6	20147.6	20893.6	21701.5	22535.9	23347.9
51	Estimates	Tunisia		788	3605.31	3696.45	3773.36	3838.51	3894.39	3943.53	3988.48	4031.78	4075.96	4123.44	4176.27	4235.94	4303.13	4377.64	4458.61	4545.34	4638.27	4737.63	4842.17	4950.15	5060.4	5172.69	5287.54	5405.35	5526.76	5652.48	5781.8	5915.01	6054.91	6205.21	6368.17	6545.02	6733.96	6930.39	7127.94	7321.88	7509.76	7692.25	7871.46	8050.93	8232.8	8417.68	8603.23	8784.89	8956.6
52	Estimates	Western Sahara		732	13.766	16.062	17.57	18.726	19.837	21.147	22.794	24.834	27.232	29.912	32.761	35.724	38.849	42.308	46.314	50.97	56.626	63.125	69.476	74.337	76.874	76.372	73.485	70.404	70.212	74.954	85.619	101.186	119.33	136.699	150.877	161.062	168.058	172.902	177.273	182.421	188.608	195.438	202.726	210.08	217.258	224.383	231.727	239.329	247.257
53	Estimates	Southern Africa		913	15533.2	15897	16273.3	16662.3	17064	17479.1	17908.2	18352.2	18812.2	19289.3	19784.7	20299.1	20832.9	21385.8	21957.3	22547.2	23154.8	23780.5	24427	25097.5	25794.2	26518.7	27269	28039.4	28821.9	29610.7	30402.6	31199.3	32006.9	32834.4	33687.8	34570.6	35479.1	36403.1	37328.2	38244.8	39144.9	40032.7	40925.8	41849.1	42818.4	43840.5	44902.9	45979.2	47032.3
54	Estimates	Botswana		72	412.531	425.265	437.169	448.442	459.238	469.74	480.148	490.626	501.398	512.647	524.552	537.249	550.84	565.353	580.799	597.19	614.613	633.154	652.843	673.64	695.597	718.639	742.835	768.512	796.095	825.84	857.855	891.926	927.585	964.166	1001.16	1038.4	1075.89	1113.54	1151.29	1189.11	1226.81	1264.31	1301.82	1339.62	1377.91	1416.73	1455.83	1494.69	1532.62
55	Estimates	Lesotho		426	733.945	744.319	754.853	765.581	776.548	787.806	799.44	811.543	824.2	837.519	851.591	866.462	882.17	898.647	915.822	933.655	952.206	971.512	991.491	1012.01	1033.05	1054.45	1076.34	1099.23	1123.86	1150.63	1179.72	1210.8	1243.35	1276.66	1310.12	1343.69	1377.35	1410.44	1442.21	1472.19	1499.86	1525.46	1550.26	1576.02	1603.94	1634.52	1667.12	1700.36	1732.26
56	Estimates	Namibia		516	485.274	494.631	504.578	515.058	526.042	537.514	549.479	561.932	574.904	588.426	602.544	617.277	632.654	648.661	665.282	682.551	700.341	718.685	737.886	758.377	780.384	804.157	829.441	855.38	880.785	904.839	927.503	949.193	970.258	991.226	1012.67	1034.26	1056.37	1081.08	1111.13	1148.3	1193.59	1245.99	1302.74	1359.93	1414.69	1465.74	1513.72	1559.98	1606.72
57	Estimates	South Africa		710	13628.4	13953.8	14291.4	14641	15002.7	15376.8	15763.8	16164.4	16579.5	17010	17456.9	17920.7	18401.6	18899.3	19413	19942.3	20486.4	21045.8	21622.6	22219.9	22839.5	23482.8	24148.1	24829.7	25519.6	26212.4	26904.3	27597.3	28298.2	29017	29760.5	30533	31330.3	32139.7	32943.6	33730.1	34490.4	35230.2	35970.5	36740.9	37560.5	38437.9	39360.2	40300.2	41218.9
58	Estimates	Swaziland		748	273.003	278.952	285.334	292.178	299.486	307.226	315.341	323.712	332.221	340.748	349.174	357.453	365.636	373.897	382.469	391.546	401.183	411.352	422.14	433.588	445.729	458.605	472.23	486.561	501.512	517.024	533.214	550.118	567.559	585.344	603.372	621.276	639.237	658.32	679.976	705.085	734.243	766.707	800.456	832.682	861.373	885.623	906.034	924.025	941.774
59	Estimates	Western Africa		914	70875.9	71969.2	73150.7	74411	75743	77141.6	78603.7	80128.5	81716.9	83371.2	85094.2	86887.4	88750.4	90680.3	92672.9	94726.6	96842.2	99025.7	101288	103643	106102	108669	111348	114146	117073	120136	123339	126679	130154	133759	137486	141339	145315	149402	153582	157843	162178	166594	171109	175749	180533	185472	190559	195782	201118
60	Estimates	Benin		204	2255.23	2258.48	2264.87	2274.48	2287.39	2303.59	2323.06	2345.72	2371.45	2400.13	2431.62	2465.87	2502.9	2542.86	2585.97	2632.36	2682.16	2735.31	2791.59	2850.66	2912.34	2976.57	3043.57	3113.68	3187.41	3265.16	3347.17	3433.44	3523.94	3618.53	3717.16	3820.13	3927.71	4039.95	4156.82	4278.5	4404.51	4535.26	4672.85	4820.02	4978.5	5149.5	5331.8	5521.76	5714.22
61	Estimates	Burkina Faso		854	4284.46	4324.49	4367.13	4413.2	4463.17	4517.15	4574.94	4635.95	4699.34	4764.08	4829.29	4894.58	4960.33	5027.82	5098.89	5174.87	5256.36	5343.02	5434.04	5528.17	5624.6	5723.38	5825.17	5930.48	6040.04	6154.55	6274.04	6398.94	6530.82	6671.66	6822.84	6985.16	7158.26	7340.9	7531.24	7727.91	7930.69	8140.07	8356.31	8579.82	8811.03	9050.08	9297.11	9552.48	9816.59
62	Estimates	Cabo Verde		132	178.066	186.13	191.527	194.837	196.635	197.421	197.7	197.928	198.539	199.906	202.31	205.956	210.867	216.908	223.846	231.428	239.77	248.747	257.509	264.909	270.198	272.992	273.651	273.005	272.292	272.423	273.652	275.767	278.739	282.415	286.657	291.602	297.285	303.368	309.397	315.069	320.183	324.893	329.671	335.184	341.883	349.934	359.09	369.014	379.156
63	Estimates	Côte d'Ivoire		384	2630.13	2695.11	2770.36	2852.5	2939.22	3029.3	3122.63	3220.16	3323.76	3435.93	3558.99	3694.2	3841.07	3996.94	4157.97	4321.79	4487.2	4656.35	4834.28	5027.97	5242.4	5479.34	5737.28	6013.86	6305.29	6608.61	6922.98	7248.83	7585.91	7934.28	8293.67	8664.06	9044.47	9432.73	9826.06	10222.6	10620.3	11019.7	11424.3	11839.2	12267.8	12710	13163	13622.7	14083.6
64	Estimates	Gambia		270	271.377	272.72	276.773	283.505	292.713	304.029	316.907	330.6	344.265	356.968	367.928	376.737	383.523	389.072	394.553	400.861	408.18	416.339	425.51	435.798	447.285	460.194	474.539	489.861	505.512	521.07	536.409	551.817	567.831	585.157	604.369	625.411	648.21	673.238	701.104	732.096	766.589	804.125	843.05	881.138	916.808	949.493	979.718	1008.36	1036.83
65	Estimates	Ghana		288	4980.88	5068.44	5191.22	5339.18	5504.25	5680.41	5863.69	6052.16	6245.65	6445.28	6652.29	6866.54	7085.46	7303.43	7513.29	7710.55	7890.99	8057.44	8221.02	8397.35	8596.98	8827.27	9083.57	9350.11	9604.28	9831.41	10023.5	10189.9	10354.5	10550.8	10802	11117.6	11488.1	11895.1	12311.2	12716.2	13104.3	13481.4	13854.2	14233.9	14628.3	15039.5	15463.9	15896.4	16330.2
66	Estimates	Guinea		324	3093.65	3141.88	3185.91	3228.38	3271.31	3316.14	3363.66	3414.05	3466.99	3521.7	3577.41	3633.65	3690.66	3749.51	3811.66	3877.81	3948.87	4023.49	4097.19	4164	4219.77	4263.84	4298.09	4324.36	4345.55	4364.51	4381.6	4398.48	4421.13	4457.08	4511.9	4589.78	4690.6	4810.5	4943.14	5084.77	5229.8	5381.48	5554.88	5770.65	6041.09	6374.33	6758.84	7163.24	7544.29
67	Estimates	Guinea-Bissau		624	535.43	544.106	552.029	559.692	567.404	575.382	583.648	592.13	600.597	608.779	616.409	623.415	629.969	636.586	643.961	652.562	662.463	673.462	685.476	698.338	711.827	726.256	741.49	756.28	768.945	778.47	784.156	786.754	788.495	792.462	800.854	814.507	832.668	854.113	876.873	899.509	921.626	943.617	965.742	988.52	1012.28	1037.15	1062.8	1088.57	1113.54
68	Estimates	Liberia		430	930.025	942.999	957.595	973.699	991.23	1010.07	1030.11	1051.25	1073.39	1096.44	1120.31	1144.99	1170.48	1196.89	1224.34	1252.97	1282.81	1313.94	1346.49	1380.64	1416.53	1454.2	1493.71	1535.23	1578.95	1625.01	1672.3	1720.49	1771.26	1826.88	1888.31	1957.46	2031.85	2102.91	2159.09	2192.55	2201.83	2191.02	2165.09	2131.53	2097.23	2060.27	2022.73	2000.25	2012.88
69	Estimates	Mali		466	4708.43	4759.04	4811.2	4864.76	4919.55	4975.4	5032.12	5089.51	5147.35	5205.45	5263.73	5322.27	5381.37	5441.61	5503.75	5568.48	5635.86	5706.2	5780.84	5861.41	5949.05	6044.53	6147.46	6256.19	6368.35	6482.28	6596.77	6712.4	6831.3	6956.58	7090.13	7234.3	7387.66	7543.74	7693.67	7831.89	7955.16	8067.76	8180.73	8309.53	8465.19	8652.51	8868.26	9105.47	9353.39
70	Estimates	Mauritania		478	660.491	675.596	691.811	709.097	727.437	746.804	767.162	788.506	810.801	834.023	858.168	883.221	909.174	936.016	963.747	992.367	1021.88	1052.29	1083.58	1115.79	1148.91	1182.95	1217.94	1253.87	1290.79	1328.69	1367.56	1407.44	1448.41	1490.6	1534.09	1578.94	1625.12	1672.5	1720.81	1769.94	1819.95	1870.98	1923	1976.03	2030.14	2085.2	2141.45	2199.79	2261.4
71	Estimates	Niger		562	2559.7	2638.14	2716.82	2795.81	2875.27	2955.54	3037.06	3120.44	3206.36	3295.58	3388.76	3486.3	3588.16	3693.87	3802.64	3913.93	4027.76	4144.4	4263.74	4385.76	4510.48	4637.83	4768.08	4902.01	5040.66	5184.81	5334.92	5490.92	5652.35	5818.51	5988.9	6164.01	6344.38	6529.89	6720.34	6915.93	7116.74	7323.97	7540.25	7768.99	8012.86	8272.98	8549.42	8842.42	9151.76
72	Estimates	Nigeria		566	37859.7	38424	39035.1	39685.8	40370.4	41085.6	41830	42604.5	43411.5	44254.7	45137.8	46062.9	47029.1	48032.2	49066.1	50127.2	51217.4	52341.8	53506	54716.7	55981.4	57295.2	58662.6	60110.4	61673.6	63373.6	65226.2	67215.8	69293.6	71391.3	73460.7	75482.6	77472.9	79462.3	81497.7	83613.3	85818.5	88101.6	90450.3	92844.4	95270	97726.3	100222	102762	105356
73	Estimates	Saint Helena	3	654	4.972	5.008	5.021	5.004	4.979	4.944	4.911	4.867	4.83	4.787	4.748	4.706	4.666	4.638	4.625	4.629	4.653	4.696	4.755	4.814	4.884	4.952	5.018	5.077	5.133	5.175	5.214	5.241	5.262	5.288	5.327	5.378	5.435	5.5	5.548	5.583	5.599	5.601	5.593	5.564	5.535	5.489	5.439	5.376	5.326
74	Estimates	Senegal		686	2486.64	2545.16	2606.41	2670.59	2737.83	2808.22	2881.81	2958.54	3038.33	3121.09	3206.75	3295.29	3386.86	3481.74	3580.31	3682.88	3789.21	3899.24	4013.54	4132.84	4257.51	4388.46	4525.11	4664.44	4802.35	4936.21	5064.67	5189.54	5315.27	5448.11	5592.65	5750.34	5920.06	6100.49	6289.33	6484.74	6686.16	6893.9	7107.98	7328.6	7555.62	7789.65	8029.73	8272.17	8512.17
75	Estimates	Sierra Leone		694	2041.2	2062.44	2084.94	2108.43	2132.73	2157.75	2183.52	2210.13	2237.77	2266.69	2297.11	2329.2	2363.01	2398.41	2435.2	2473.29	2512.65	2553.53	2596.57	2642.61	2692.26	2745.78	2803.03	2863.74	2927.47	2993.88	3062.96	3134.8	3209.26	3286.18	3365.44	3445.28	3525.4	3608.75	3699.47	3799.55	3912.44	4034.67	4152.98	4249.47	4312.25	4337.24	4331.33	4307.3	4283.62
76	Estimates	Togo		768	1395.46	1425.49	1441.91	1452.09	1461.52	1473.84	1490.73	1512.03	1535.97	1559.67	1580.51	1597.53	1612.76	1631.76	1662.07	1708.63	1774.03	1855.44	1945.78	2034.91	2115.52	2185.66	2247.58	2303.34	2356.62	2410.45	2464.45	2518.57	2576.47	2642.85	2720.84	2812.04	2915.07	3026.24	3140.24	3252.99	3364.02	3474.08	3581.93	3686.37	3786.94	3882.27	3973.33	4064.93	4163.64
77	Estimates	ASIA		935	1.40406e+06	1.43453e+06	1.46316e+06	1.49084e+06	1.5183e+06	1.54614e+06	1.57477e+06	1.60445e+06	1.63529e+06	1.6673e+06	1.70046e+06	1.73485e+06	1.77068e+06	1.80837e+06	1.84845e+06	1.89123e+06	1.93686e+06	1.98509e+06	2.03524e+06	2.08639e+06	2.13783e+06	2.18939e+06	2.2411e+06	2.29267e+06	2.3438e+06	2.39434e+06	2.44409e+06	2.49319e+06	2.54216e+06	2.59173e+06	2.64249e+06	2.69442e+06	2.74744e+06	2.80183e+06	2.85796e+06	2.91595e+06	2.97602e+06	3.03782e+06	3.10023e+06	3.16177e+06	3.22134e+06	3.27855e+06	3.3336e+06	3.38676e+06	3.43853e+06
78	Estimates	Eastern Asia		906	677556	694585	708900	721429	732938	744028	755127	766503	778275	790449	803015	816043	829776	844665	861265	879913	900780	923600	947725	972239	996425	1.02012e+06	1.04335e+06	1.06579e+06	1.08715e+06	1.10722e+06	1.12586e+06	1.14317e+06	1.15955e+06	1.1756e+06	1.19179e+06	1.20809e+06	1.22449e+06	1.24146e+06	1.25956e+06	1.27912e+06	1.30038e+06	1.32304e+06	1.34615e+06	1.36839e+06	1.3888e+06	1.40706e+06	1.42338e+06	1.43797e+06	1.45125e+06
79	Estimates	China	4	156	554419	569611	582029	592568	601971	610834	619598	628551	637854	647556	657686	668335	679732	692280	706461	722562	740746	760771	782009	803577	824788	845482	865687	885146	903614	920945	937018	951927	966040	979881	993877	1.008e+06	1.02225e+06	1.03712e+06	1.05321e+06	1.07086e+06	1.09035e+06	1.11134e+06	1.13287e+06	1.15357e+06	1.17245e+06	1.18918e+06	1.204e+06	1.21713e+06	1.22899e+06
80	Estimates	China, Hong Kong SAR	5	344	1974	2063.32	2160.1	2264.11	2374.54	2490.1	2608.94	2728.66	2846.52	2959.53	3065.19	3162.03	3250.31	3332.16	3410.96	3489.21	3568.38	3648.03	3726.7	3802.1	3873.11	3937.83	3998.31	4062.04	4139.1	4236	4356.57	4496.87	4646.18	4789.32	4915.47	5020.49	5107.91	5183.91	5258.16	5337.62	5424.52	5516.36	5609.69	5699.22	5781.46	5854.09	5919.29	5983.35	6055.09
81	Estimates	China, Macao SAR	6	446	196.483	200.49	201.274	199.292	195.132	189.461	183.047	176.753	171.523	168.289	167.796	170.465	176.188	184.25	193.563	203.231	213.196	223.42	233.004	240.842	246.195	248.739	248.767	246.947	244.284	241.628	239.085	236.695	235.198	235.479	238.118	243.427	251.219	260.997	271.993	283.581	295.677	308.275	320.877	332.901	343.935	353.764	362.459	370.345	377.96
82	Estimates	China, Taiwan Province of China		158	7623.36	7893.06	8163.93	8440.26	8725.47	9022.18	9331.9	9655.24	9991.99	10341.2	10701.7	11072.3	11452.5	11842.1	12241.5	12649.7	13067.8	13492.5	13913.3	14316.7	14693.2	15038	15354.6	15651.3	15940.9	16232.7	16528.7	16826.5	17125.2	17422.7	17717.4	18009.4	18299.2	18584.3	18862	19130.1	19387.4	19634	19869.9	20095.7	20311.7	20518.8	20716.7	20902.9	21074.1
83	Estimates	Dem. People's Republic of Korea		408	10549.5	10248.5	10049	9957.24	9972.44	10087	10285.9	10547.4	10844	11145.2	11424.2	11665.6	11871.7	12065.5	12282.4	12547.5	12865	13222.7	13610	14010.3	14410.4	14809.5	15207.8	15593.4	15952.1	16274.7	16554.7	16796.6	17016	17235.7	17472.1	17731.2	18008.6	18298.2	18590.1	18877.2	19156.8	19432	19708.3	19993.8	20293.1	20609.2	20937.4	21265.8	21578
84	Estimates	Japan		392	82802.1	84315.6	85658.7	86869.4	87980.3	89018.3	90004.3	90954	91877.7	92782.2	93673.6	94560.8	95458.9	96390	97379.8	98447	99595.1	100820	102120	103492	104926	106425	107977	109533	111030	112423	113690	114839	115890	116878	117827	118743	119616	120438	121200	121894	122520	123083	123595	124069	124516	124940	125341	125718	126063
85	Estimates	Mongolia		496	780.199	793.538	807.921	823.06	838.785	855.103	872.156	890.274	909.89	931.481	955.505	982.178	1011.32	1042.38	1074.51	1107.12	1139.96	1173.19	1207.1	1242.21	1278.83	1317.05	1356.67	1397.3	1438.42	1479.65	1520.87	1562.21	1603.91	1646.29	1689.62	1733.47	1777.73	1823.22	1871.09	1921.88	1976.31	2033.34	2089.71	2141.01	2184.14	2217.92	2243.5	2263.2	2280.5
86	Estimates	Republic of Korea		410	19211.4	19459.4	19829.4	20307.9	20880.4	21531.3	22243.6	22999.2	23779.4	24565.3	25340.9	26094.8	26822.6	27528.2	28220.8	28907.1	29584.6	30249.5	30905.4	31557.6	32209.3	32863.7	33518.4	34164.5	34789.9	35386.5	35948.9	36481.6	36997.8	37516.5	38050.4	38606.8	39179.5	39752	40300.4	40808.6	41269.3	41690.8	42091	42495.7	42923.1	43378.1	43853.4	44340.6	44825.9
87	Estimates	South-Central Asia	7	921	510788	519193	528135	537602	547586	558081	569082	580589	592601	605121	618148	631682	645714	660232	675218	690660	706563	722928	739734	756952	774570	792576	810995	829898	849381	869514	890309	911750	933845	956593	979984	1.004e+06	1.02862e+06	1.05377e+06	1.0794e+06	1.10544e+06	1.13187e+06	1.15864e+06	1.18562e+06	1.21266e+06	1.23966e+06	1.26653e+06	1.2933e+06	1.31999e+06	1.34672e+06
88	Estimates	Central Asia		5500	17449.5	17889.9	18412.3	19003.8	19653.5	20352.4	21093.7	21872.4	22685.3	23530.5	24405.9	25307.6	26229	27159.7	28087.4	29002.8	29901.6	30783.2	31646	32489.8	33315.1	34120.8	34908.2	35683.4	36455.1	37230.1	38010.5	38797.1	39594.4	40407.2	41238.8	42087.1	42950.6	43833.4	44740.5	45672.7	46633.4	47612.9	48581.7	49501.2	50343.3	51100.9	51781.6	52390.4	52938.4
89	Estimates	Kazakhstan		398	6702.99	6831.32	7041.8	7315.65	7636.83	7992	8370.63	8764.92	9169.45	9580.8	9996	10411	10819.5	11211.9	11577.5	11909	12201	12455.7	12682.9	12897.4	13110	13324.7	13538.7	13748.3	13946.8	14130.1	14296.8	14450.5	14597.8	14747.6	14905.9	15072.4	15244	15421.2	15603.7	15789.4	15981	16173.1	16346.2	16474.6	16540.3	16540	16481.1	16370	16217.5
90	Estimates	Kyrgyzstan		417	1740	1765.56	1795.13	1828.19	1864.49	1904.06	1947.22	1994.56	2046.91	2105.18	2170.09	2241.75	2319.45	2401.46	2485.43	2569.46	2653.05	2736.08	2817.34	2895.54	2969.86	3039.77	3105.53	3168.29	3229.69	3291.08	3352.62	3414.32	3477.23	3542.52	3610.98	3682.67	3757.18	3834.17	3913.06	3993.11	4075.19	4158.61	4239.3	4311.87	4372.89	4419.63	4454.19	4483.84	4518.8
91	Estimates	Tajikistan		762	1531.5	1584.99	1637.95	1690.33	1742.35	1794.41	1847.25	1901.78	1959.14	2020.55	2087.04	2159.12	2236.56	2318.23	2402.45	2487.95	2574.48	2662.23	2750.89	2840.23	2930.08	3020.39	3111.26	3203.02	3296.09	3390.93	3487.64	3586.5	3688.39	3794.42	3905.41	4020.78	4140.26	4265.25	4397.52	4537.79	4687.28	4843.95	5001.11	5149.8	5283.73	5400.71	5502.98	5594.11	5679.83
92	Estimates	Turkmenistan		795	1210.99	1231.83	1258.39	1289.83	1325.43	1364.63	1406.98	1452.17	1500.02	1550.41	1603.26	1658.36	1715.41	1773.85	1833.06	1892.6	1952.14	2011.76	2071.79	2132.8	2195.17	2258.96	2324.01	2390.21	2457.38	2525.36	2594.31	2664.26	2734.9	2805.82	2876.81	2947.78	3019.07	3091.51	3166.22	3244.02	3324.46	3407.32	3493.89	3585.87	3683.97	3789.18	3899.84	4010.79	4115.1
93	Estimates	Uzbekistan		860	6264.06	6476.16	6678.99	6879.76	7084.38	7297.3	7521.59	7758.93	8009.77	8273.56	8549.49	8837.35	9138.1	9454.25	9788.99	10143.7	10520.9	10917.4	11323.1	11723.8	12110	12477.1	12828.6	13173.6	13525.1	13892.6	14279.1	14681.5	15096	15516.9	15939.7	16363.6	16790.1	17221.2	17660	18108.3	18565.5	19029.9	19501.2	19979.1	20462.5	20951.4	21443.5	21931.7	22407.2
94	Estimates	Southern Asia		5501	493339	501304	509723	518599	527933	537729	547989	558716	569916	581590	593743	606375	619485	633072	647131	661657	676661	692145	708088	724462	741255	758455	776087	794215	812926	832284	852298	872953	894251	916186	938745	961915	985665	1.00994e+06	1.03466e+06	1.05977e+06	1.08524e+06	1.11103e+06	1.13704e+06	1.16316e+06	1.18932e+06	1.21543e+06	1.24151e+06	1.2676e+06	1.29378e+06
95	Estimates	Afghanistan		4	7752.12	7839.51	7934.98	8038.6	8150.45	8270.58	8399.03	8535.81	8680.95	8834.44	8996.35	9166.76	9345.87	9533.95	9731.36	9938.41	10152.3	10372.6	10604.3	10854.4	11126.1	11417.8	11721.9	12027.8	12321.5	12590.3	12840.3	13067.5	13237.7	13306.7	13248.4	13054	12749.6	12389.3	12047.1	11783	11601	11502.8	11540.9	11777.6	12249.1	12993.7	13981.2	15095.1	16172.7
96	Estimates	Bangladesh		50	37894.7	38705.1	39491.1	40300.4	41169.1	42121.5	43169.9	44314.8	45546.5	46847.4	48199.7	49592.8	51030.1	52532.4	54129.1	55834	57673	59620.7	61579.5	63417.4	65047.8	66424.7	67597.5	68691.2	69884.4	71305.9	72999.1	74925.9	77033.8	79236.8	81470.9	83721.3	86007.3	88338.2	90732.4	93199.9	95742.4	98343.8	100975	103599	106189	108727	111222	113695	116182
97	Estimates	Bhutan		64	176.797	180.825	184.79	188.816	193.011	197.457	202.174	207.165	212.384	217.773	223.288	228.918	234.706	240.778	247.325	254.464	262.244	270.622	279.515	288.774	298.301	308.053	318.045	328.312	338.943	349.982	361.455	373.324	385.384	397.39	409.172	420.38	431.05	441.847	453.72	467.178	482.952	500.437	517.273	530.257	537.28	537.284	531.525	523.117	516.503
98	Estimates	India		356	376325	382245	388539	395160	402077	409269	416729	424461	432482	440814	449481	458495	467853	477528	487485	497702	508162	518890	529967	541505	553579	566225	579412	593059	607050	621302	635772	650485	665502	680916	696784	713118	729868	746949	764245	781667	799181	816793	834489	852270	870133	888055	906021	924058	942204
99	Estimates	Iran (Islamic Republic of)		364	17119.3	17516.6	17933.4	18368.9	18822.6	19294	19782.7	20288.4	20811.1	21350.5	21906.9	22480.4	23071.4	23680.4	24308.1	24955.1	25624.7	26318.1	27032.9	27765.2	28514	29281.3	30074.3	30904.3	31785.5	32730.6	33737.8	34810.7	35972.7	37252.7	38668.2	40217.6	41883.3	43645.1	45474.7	47342.7	49256.8	51197.5	53075.6	54777.1	56226.2	57375.6	58260.7	58991.2	59725.1
100	Estimates	Maldives		462	73.714	74.223	75.194	76.486	78.016	79.714	81.52	83.435	85.451	87.59	89.887	92.35	94.938	97.584	100.214	102.766	105.19	107.538	109.959	112.651	115.768	119.378	123.441	127.791	132.195	136.519	140.665	144.736	148.892	153.386	158.385	163.935	169.96	176.356	182.953	189.637	196.357	203.124	209.885	216.595	223.215	229.754	236.19	242.459	248.433
101	Estimates	Nepal		524	8483.33	8658.31	8824.45	8984.31	9140.06	9293.49	9446.01	9598.63	9752.05	9906.69	10063	10221.8	10384.2	10552.3	10728.2	10913.7	11109.9	11316.8	11534.3	11761.5	11997.9	12243.8	12499.4	12765	13040.4	13325.8	13621.1	13926.3	14241.4	14566.7	14902.2	15249	15607.2	15974.4	16347.2	16724	17101.1	17480.9	17873.7	18293.5	18749.4	19245.1	19773.8	20321.2	20867.1
102	Estimates	Pakistan		586	37542.4	37975.3	38483.9	39063.9	39711.6	40424.3	41199.7	42036.4	42933.6	43891	44908.3	45984.9	47119.4	48309.3	49551.9	50845.2	52191.1	53590.9	55042.4	56542.4	58090.8	59687.1	61338.3	63059.5	64870.8	66787.9	68813.2	70946.2	73194.9	75567.7	78068.1	80696.9	83445.9	86297.6	89228.9	92219.5	95264.5	98357.5	101475	104588	107679	110730	113747	116750	119770
103	Estimates	Sri Lanka		144	7971.1	8108.43	8256.56	8417.12	8591.03	8778.45	8978.77	9190.66	9412.16	9640.84	9874.48	10111.6	10352.2	10597.5	10850	11110.8	11380.7	11657.7	11937.6	12215	12485.8	12747.8	13002.3	13252.1	13502	13755.2	14012.8	14273.3	14533.4	14788.6	15035.9	15273.4	15502.5	15726.8	15951.4	16179.8	16412.7	16647.9	16882.2	17110.7	17329.7	17539.6	17740.6	17928.6	18098.3
104	Estimates	South-Eastern Asia		920	164525	168303	172354	176668	181233	186039	191077	196335	201804	207474	213335	219378	225594	231975	238514	245202	252027	258980	266062	273272	280607	288079	295673	303337	311004	318628	326178	333679	341227	348956	356956	365256	373810	382555	391393	400246	409096	417944	426752	435479	444097	452580	460927	469154	477295
105	Estimates	Brunei Darussalam		96	48.001	50.961	53.927	56.968	60.12	63.42	66.862	70.457	74.15	77.919	81.745	85.596	89.516	93.576	97.848	102.425	107.316	112.494	117.95	123.653	129.583	135.726	142.073	148.56	155.109	161.671	168.224	174.773	181.257	187.656	193.949	200.085	206.128	212.136	218.227	224.512	230.972	237.622	244.458	251.514	258.785	266.274	273.963	281.751	289.525
106	Estimates	Cambodia		116	4432.71	4537.54	4656.28	4783.09	4913.69	5045.29	5176.66	5308.14	5441.32	5578.68	5722.37	5873.02	6028.55	6183.75	6331.58	6467.2	6584.77	6685.32	6778.72	6879.18	6994.85	7137.75	7300.15	7447.28	7531.42	7522.59	7402.87	7194.28	6955.57	6768.72	6692.11	6748.19	6918.1	7168.24	7446.02	7712.98	7958.98	8196.04	8433.8	8689.15	8973.34	9286.98	9621.5	9968.27	10315.4
107	Estimates	Indonesia		360	69543.3	70869.6	72309.9	73866.5	75539.7	77327.8	79226.8	81230.7	83332.1	85522	87792.5	90138.2	92558	95055.7	97638	100309	103067	105907	108822	111800	114835	117922	121060	124242	127465	130724	134011	137322	140666	144054	147490	150979	154506	158044	161556	165012	168402	171729	175001	178233	181437	184616	187766	190880	193945
108	Estimates	Lao People's Democratic Republic		418	1682.91	1723.16	1764.01	1805.52	1847.78	1890.85	1934.81	1979.73	2025.67	2072.7	2120.9	2170.34	2221.12	2273.35	2327.14	2382.59	2439.2	2496.92	2556.85	2620.43	2688.43	2762.26	2840.84	2919.29	2990.97	3051.58	3098.97	3135.84	3168.84	3207.33	3258.14	3323.38	3401.24	3489.98	3586.38	3687.9	3794.04	3905.16	4020.3	4138.41	4258.47	4380.07	4502.36	4623.28	4740.38
109	Estimates	Malaysia	8	458	6109.91	6271.49	6450.08	6640.04	6837.36	7039.72	7246.54	7458.9	7679.27	7911.04	8157.11	8418.46	8692.82	8974.08	9253.96	9526.56	9789.98	10046.2	10297.8	10549.2	10804	11062.3	11324.3	11592.7	11871.2	12162.4	12468.9	12790.5	13123.1	13460.2	13798.1	14133.8	14470.6	14818.6	15191.6	15598.9	16045	16525.1	17027.6	17536	18038.3	18529.5	19012.7	19495	19986.9
110	Estimates	Myanmar		104	17151.5	17470.1	17796.4	18136	18492.5	18868	19262.6	19675	20102.2	20540.4	20986.1	21438	21898	22371.9	22867.7	23391.1	23944.2	24524.5	25128.1	25748.6	26381.4	27025	27680.1	28347.3	29027.7	29722	30428	31144.3	31872.2	32613.9	33369.7	34139.1	34917.9	35697.9	36468.9	37222.3	37957.3	38673.2	39362.1	40014.9	40626.2	41190.2	41711.5	42209.8	42712.2
111	Estimates	Philippines		608	18580.5	19246.6	19945.7	20670.5	21416.1	22179.1	22958.4	23754.6	24570.2	25408.6	26273	27164.6	28081.2	29016.8	29962.9	30913.9	31867.6	32826.6	33797	34787.6	35804.7	36851.1	37925.4	39026.1	40150	41295.1	42461.2	43650.3	44866.3	46114	47397	48715.6	50068.5	51455	52874	54323.6	55804.1	57313.3	58845.2	60391.9	61947.3	63508.5	65075.5	66650.2	68236.2
112	Estimates	Singapore		702	1022.1	1067.79	1119.93	1177.58	1239.68	1305.09	1372.49	1440.46	1507.51	1572.14	1633.09	1689.55	1741.42	1789.34	1834.49	1877.81	1919.27	1958.73	1996.87	2034.53	2072.29	2110.97	2150.52	2189.64	2226.4	2259.75	2288.89	2315.01	2341.43	2372.61	2411.7	2460.39	2517.58	2580.26	2643.95	2705.53	2763.59	2819.6	2876.89	2940.26	3012.95	3096.57	3189.43	3287.59	3385.35
113	Estimates	Thailand		764	20710.4	21263.2	21838	22436.5	23060.4	23711	24389.5	25096.8	25833.6	26600.3	27397.2	28224.2	29081	29967	30881.3	31822.8	32789.1	33778.5	34790.9	35826.8	36884.9	37964.9	39062	40165	41259.5	42335	43386.8	44416	45423.4	46412.3	47385.3	48337.5	49267.6	50186.2	51108.1	52041.5	52996.5	53964.4	54912.3	55795.1	56582.8	57258.4	57837.9	58364.9	58901.7
114	Estimates	Timor-Leste		626	433.397	438.237	443.42	448.981	454.968	461.385	468.246	475.546	483.279	491.423	499.95	508.845	518.107	527.749	537.786	548.218	558.676	569.031	579.807	591.739	605.125	620.945	638.499	654.437	664.223	664.984	654.947	636.096	613.857	595.872	587.563	591.005	604.43	624.648	646.688	666.945	684.184	699.522	714.474	731.444	751.933	777.011	805.435	833.611	856.684
115	Estimates	Viet Nam		704	24809.9	25364.5	25976.8	26646.2	27370.7	28147.8	28973.9	29844.5	30754.6	31698.4	32670.6	33666.8	34684.2	35722.1	36781	37860	38959.3	40074.7	41195.8	42309.7	43407.3	44485.9	45549.5	46604.7	47661.8	48729.4	49808.1	50899.5	52015.3	53169.7	54372.5	55627.7	56931.8	58277.4	59653.1	61049.4	62459.6	63881.3	65313.7	66757.4	68209.6	69670.9	71130.4	72560.4	73925.1
116	Estimates	Western Asia		922	51192.6	52453.3	53770.6	55136.3	56545.3	57995	59486.1	61022.1	62608.9	64254.2	65964.6	67744.2	69591.5	71499	73455.6	75454.4	77493.1	79577.4	81718.2	83930.6	86225.8	88609.7	91081.1	93636.5	96269.4	98976.2	101750	104596	107531	110582	113761	117078	120516	124039	127595	131146	134676	138192	141704	145231	148788	152381	156003	159638	163262
117	Estimates	Armenia		51	1353.51	1381.87	1418.28	1461.42	1510.17	1563.51	1620.59	1680.71	1743.3	1807.92	1874.12	1941.49	2009.53	2077.57	2145	2211.32	2276.03	2339.12	2401.14	2462.93	2525.07	2587.71	2650.48	2712.78	2773.75	2832.76	2889.58	2944.38	2997.41	3049.11	3099.75	3148.09	3193.69	3238.59	3285.59	3335.93	3392.26	3451.94	3504.65	3536.47	3538.16	3505.25	3442.81	3363.1	3283.66
118	Estimates	Azerbaijan	9	31	2927.92	2987.27	3060.01	3142.81	3233.17	3329.39	3430.66	3537.03	3649.19	3768.33	3895.4	4030.32	4171.43	4315.13	4456.69	4592.61	4721.52	4843.87	4960.23	5071.93	5180.02	5284.53	5385.27	5483.08	5579.08	5674.14	5768.72	5863.13	5957.93	6053.65	6150.74	6249.32	6349.56	6452.08	6557.59	6666.45	6778.63	6893.5	7010.04	7126.89	7242.77	7357.96	7471.93	7581.76	7683.71
119	Estimates	Bahrain		48	115.611	116.832	119.586	123.489	128.253	133.585	139.268	145.109	150.982	156.777	162.427	167.894	173.144	178.14	182.887	187.431	191.78	196.063	200.653	206.043	212.605	220.312	229.155	239.527	251.911	266.543	283.752	303.175	323.473	342.798	359.888	374.12	385.95	396.454	407.227	419.43	433.482	448.973	465.202	481.09	495.931	509.765	523.087	536.213	549.588
120	Estimates	Cyprus	10	196	494.015	500.381	506.627	513.434	521.184	529.972	539.565	549.461	558.895	566.982	572.93	576.395	577.691	577.913	578.627	580.966	585.308	591.308	598.493	606.113	613.621	620.859	628.002	635.111	642.339	649.755	657.534	665.528	673.251	680.011	685.406	689.173	691.702	694.077	697.717	703.687	712.341	723.38	736.479	751.044	766.614	783.129	800.609	818.751	837.11
121	Estimates	Georgia	11	268	3527.01	3555.87	3588.62	3625.6	3667.06	3713.12	3763.76	3818.85	3878.13	3941.23	4007.71	4077.07	4148.73	4222.14	4296.66	4371.52	4446.82	4521.71	4593.31	4658	4713.32	4758.15	4793.55	4822.16	4847.85	4873.62	4900.18	4927.24	4955.5	4985.56	5017.82	5051.23	5085.51	5122.38	5164.14	5211.44	5266.83	5327.23	5380.91	5412.15	5410.37	5370.65	5298.09	5204.63	5107.67
122	Estimates	Iraq		368	5719.19	5901.51	6065.01	6216.13	6360.44	6502.66	6646.64	6795.4	6951.16	7115.51	7289.76	7475.35	7674.22	7888.91	8122.2	8375.79	8651.16	8947.4	9260.68	9585.58	9917.98	10255.9	10599.8	10951.2	11312.3	11684.6	12068.2	12460.9	12859.1	13257.8	13653.4	14046.5	14438.3	14825.8	15205.5	15576.4	15936.4	16290.1	16651.8	17040.2	17469	17942.7	18458.2	19011.9	19597.2
123	Estimates	Israel		376	1257.97	1354.1	1451.49	1546.24	1635.78	1718.96	1796.01	1868.58	1939.45	2012.15	2089.89	2174.27	2264.31	2355.93	2443.3	2522.53	2591.59	2652.7	2711.3	2775.16	2849.62	2936.67	3033.92	3137.03	3239.56	3336.76	3427.66	3513.53	3594.49	3671.28	3744.67	3815.23	3883.47	3950.12	4016.13	4082.79	4148.95	4216.18	4291.58	4384.35	4500.48	4643.2	4808.86	4987.73	5166.07
124	Estimates	Jordan		400	481.321	536.446	576.367	610.079	644.196	682.952	728.04	778.771	832.428	884.864	932.257	973.083	1009.73	1049.3	1101.46	1172.55	1265.81	1377.46	1498.31	1615.28	1718.91	1806.61	1881.21	1945.63	2004.83	2062.92	2120.07	2176.14	2234.59	2299.66	2374.42	2461.19	2559.72	2667.47	2780.43	2895.99	3011.3	3127.92	3252.67	3395.02	3560.58	3753.43	3968.2	4189.43	4395.95
125	Estimates	Kuwait		414	153.096	157.932	162.696	167.896	174.091	181.888	191.975	205.065	221.911	243.235	269.618	301.336	338.296	379.891	425.235	473.554	524.856	579.007	634.897	691.129	746.767	801.142	854.604	908.52	964.834	1024.94	1089.21	1157.03	1227.6	1299.68	1372.32	1442.99	1511.31	1580.64	1655.83	1738.99	1836.11	1942.81	2038.88	2096.93	2099.61	2035.66	1916.88	1777.14	1663.93
126	Estimates	Lebanon		422	1334.62	1358.22	1392.72	1434.85	1481.96	1532.11	1584.03	1637.13	1691.36	1747.16	1804.93	1864.61	1925.28	1984.98	2041.21	2092.35	2136.64	2174.84	2210.96	2250.6	2297.39	2353.55	2416.74	2480.42	2535.5	2575.69	2598.35	2606.22	2604.86	2602.57	2605.29	2615.75	2632.28	2651.29	2667.22	2676.58	2677.28	2672.17	2668.59	2676.61	2703.02	2752.46	2821.86	2900.85	2974.64
127	Estimates	Oman		512	456.419	462.251	469.35	477.44	486.312	495.816	505.892	516.471	527.598	539.328	551.74	564.89	578.824	593.501	608.887	625.009	642.003	660.119	679.597	700.725	723.852	748.973	776.383	806.991	841.948	882.044	927.439	977.808	1032.8	1091.85	1154.38	1220.59	1290.11	1361.1	1431.08	1498.42	1561.18	1619.86	1678.12	1741.16	1812.16	1893.77	1983.28	2072.11	2148.43
128	Estimates	Qatar		634	25.003	27.497	29.873	32.06	34.042	35.866	37.622	39.45	41.546	44.126	47.384	51.421	56.263	61.717	67.567	73.633	79.844	86.295	93.201	100.874	109.514	119.424	130.534	142.241	153.704	164.413	173.836	182.443	192.093	205.313	223.775	248.144	277.396	309.479	341.455	371.081	397.932	422.341	443.794	461.87	476.445	487.491	495.517	501.566	507.095
129	Estimates	Saudi Arabia		682	3121.34	3198.55	3283.3	3372.62	3464.55	3558.16	3653.56	3751.88	3855.08	3965.82	4086.54	4218.88	4362.86	4516.66	4677.4	4843.64	5015.2	5194.85	5387.49	5599.63	5836.39	6100.99	6393.89	6714.1	7059.33	7428.7	7818.61	8231.6	8679.84	9179.62	9740.6	10366.7	11048.1	11763.8	12485	13189.1	13869	14525.7	15155.2	15755.9	16326.8	16867.8	17378.8	17859.8	18311.1
130	Estimates	State of Palestine	12	275	931.928	923.747	931.907	948.782	968.648	987.76	1004.31	1018.49	1032.1	1048.11	1069.32	1096.81	1128.71	1159.58	1182.05	1191.38	1184.69	1165.05	1141.05	1124.75	1124.65	1144.09	1180.05	1226.93	1276.13	1321.42	1361.35	1398.02	1433.1	1469.44	1509.18	1552.79	1599.64	1649.7	1702.66	1758.48	1817.04	1878.94	1945.68	2019.23	2100.88	2190.4	2286.99	2390.6	2501.08
131	Estimates	Syrian Arab Republic		760	3413.33	3498.53	3591.01	3690.74	3797.62	3911.5	4032.07	4158.98	4291.8	4430.1	4573.51	4721.9	4875.42	5034.65	5200.34	5373.14	5553.25	5740.71	5935.86	6139.05	6350.54	6570.86	6800.14	7037.85	7283.18	7535.71	7794.66	8060.65	8336.42	8625.69	8930.77	9252.85	9590.23	9938.85	10293	10648.6	11004.3	11360.9	11719.1	12080.4	12446.2	12815.2	13187.1	13564.2	13949.7
132	Estimates	Turkey		792	21408.4	21951.2	22508.9	23081.6	23668.9	24270.6	24886.1	25514.8	26155.9	26808.6	27472.3	28146.9	28832.8	29531.3	30244.2	30973	31717.5	32478	33256.4	34055.4	34876.3	35720.6	36587.2	37472.3	38370.2	39277.2	40189.5	41108.2	42039.9	42994	43975.9	44988.4	46025.4	47073.4	48114.1	49133.9	50128.5	51100.9	52053.7	52992.4	53921.7	54840.5	55748.9	56653.7	57564.1
133	Estimates	United Arab Emirates		784	69.588	67.32	69.063	72.63	76.46	79.578	81.682	83.068	84.559	87.362	92.634	101.078	112.472	125.566	138.529	150.362	160.481	170.283	183.194	203.82	235.499	278.808	332.76	397.174	471.364	554.324	646.943	748.117	852.262	952.04	1042.38	1120.9	1189.55	1253.06	1318.48	1391.05	1472.22	1560.72	1655.85	1756.04	1860.17	1970.03	2086.64	2207.41	2328.69
134	Estimates	Yemen		887	4402.32	4473.75	4545.74	4618.55	4692.42	4767.59	4844.32	4922.89	5003.53	5086.54	5172.14	5260.5	5351.8	5446.06	5543.34	5643.64	5748.59	5858.64	5971.41	6083.62	6193.81	6300.55	6407.3	6523.45	6661.57	6830.69	7034.87	7271.87	7536.76	7821.55	8120.5	8434.02	8764.62	9111.1	9472.17	9847.9	10232.7	10628.6	11051.5	11523.3	12057	12661.6	13325.6	14017.2	14692.7
135	Estimates	EUROPE		908	549375	554467	559928	565596	571351	577110	582838	588537	594245	600023	605925	611964	618080	624130	629926	635332	640286	644832	649085	653217	657350	661523	665692	669811	673800	677605	681221	684673	687975	691147	694207	697141	699950	702690	705434	708227	711091	713985	716807	719413	721699	723654	725300	726604	727534
136	Estimates	Eastern Europe		923	220171	223326	226669	230125	233628	237126	240579	243961	247255	250453	253553	256545	259414	262128	264654	266974	269073	270971	272735	274454	276197	277986	279812	281670	283544	285420	287301	289190	291079	292952	294798	296599	298347	300048	301714	303346	304947	306488	307890	309052	309902	310416	310614	310512	310149
137	Estimates	Belarus		112	7745	7717.07	7710.09	7723.23	7755.06	7803.54	7865.98	7939.12	8019.18	8102.2	8184.63	8264.14	8340.24	8414.51	8489.93	8568.45	8650.32	8734.04	8817.94	8899.69	8977.64	9051.22	9120.96	9187.67	9252.68	9316.95	9380.45	9443	9505.45	9568.88	9633.89	9700.25	9767.26	9834.42	9901.05	9966.15	10030.1	10091.6	10146.6	10189.6	10216.8	10226.5	10219.9	10200.5	10173.4
138	Estimates	Bulgaria		100	7251	7310.51	7371.97	7434.61	7497.87	7561.4	7625.1	7689.05	7753.53	7818.91	7885.52	7953.38	8022.06	8090.6	8157.72	8222.47	8284.33	8343.39	8399.92	8454.5	8507.48	8558.97	8608.61	8655.67	8699.14	8738.36	8772.53	8801.89	8828.01	8853.19	8878.77	8905.07	8930.67	8953.07	8968.86	8975.29	8972.47	8960.47	8936.56	8897.45	8841.37	8766.89	8676.24	8575.89	8474.67
139	Estimates	Czechia		203	8902.62	9007.01	9110.14	9205.96	9290.49	9361.76	9420.02	9467.55	9508.37	9547.67	9590.19	9638.41	9691.08	9742.47	9784.36	9811.41	9821.11	9817.19	9808.04	9805.46	9817.82	9847.39	9891.28	9946.38	10007.5	10070.1	10134.7	10200.9	10263.1	10314.2	10349.3	10365.7	10365.5	10354.3	10340.8	10331.4	10327.5	10327.7	10331.2	10336.2	10341.2	10346.8	10353.3	10359	10361.2
140	Estimates	Hungary		348	9337.72	9480.57	9597.9	9692.84	9768.62	9828.44	9875.55	9913.23	9944.7	9973.06	10001	10030.5	10062.6	10097.1	10133.1	10169.9	10208.4	10248.9	10289.9	10329.6	10366.3	10398.4	10426.4	10454.1	10486.6	10527.3	10578.5	10637.1	10693.8	10736	10754.8	10747	10716.3	10669.7	10617.2	10566.8	10519.8	10475	10435	10402.1	10377.7	10363.6	10359.1	10359.6	10358.1
141	Estimates	Poland		616	24824	25283.4	25764.9	26261.1	26764.9	27269.7	27769.5	28258.5	28731.4	29183.7	29611.6	30012.7	30386.3	30733.4	31056.3	31357.7	31637.8	31898.3	32146.1	32389.5	32635.6	32886.6	33143.2	33407.6	33681.7	33966.6	34261.9	34566.9	34881.4	35204.7	35535.1	35873.7	36216.7	36550.8	36858.9	37128.7	37354.3	37539	37691.9	37827	37954.6	38077.2	38191.8	38295.5	38383.5
142	Estimates	Republic of Moldova	13	498	2341	2381.44	2432.09	2491.06	2556.59	2627.01	2700.79	2776.55	2852.99	2928.99	3003.56	3075.92	3145.55	3212.09	3275.46	3335.63	3392.09	3444.85	3495.14	3544.64	3594.52	3645.52	3697.15	3747.93	3795.65	3838.91	3876.95	3910.64	3942.14	3974.51	4009.84	4048.62	4089.86	4132.45	4174.62	4214.92	4253.16	4289.1	4320.93	4346.45	4364.12	4373.58	4375.31	4369.65	4357.28
143	Estimates	Romania		642	16236.3	16512.7	16764.9	17005.7	17243.8	17483.9	17726.6	17968.5	18202.7	18420.5	18613.9	18780.2	18924.2	19059.9	19207.1	19379.6	19582.3	19810.6	20055.9	20305.3	20548.9	20783.7	21011.7	21233.5	21451.1	21665.6	21877.4	22083.8	22279.3	22456.9	22612	22739.8	22842.3	22928.9	23013.2	23103.6	23205.3	23312.1	23408.4	23472.6	23489.4	23454.2	23373.4	23256	23116.2
144	Estimates	Russian Federation		643	102799	104306	105969	107729	109538	111355	113152	114910	116616	118267	119860	121390	122843	124193	125413	126484	127396	128165	128836	129473	130123	130805	131514	132251	133009	133784	134580	135403	136255	137141	138059	139002	139965	140947	141951	142971	144012	145052	146036	146891	147564	148036	148318	148431	148412
145	Estimates	Slovakia		703	3436.57	3510.93	3587.66	3664.92	3741.21	3815.4	3886.75	3954.86	4019.64	4081.32	4140.13	4196.17	4249.2	4298.58	4343.46	4383.45	4418.2	4448.55	4476.82	4506.16	4538.84	4575.56	4615.83	4659.28	4705.11	4752.54	4801.74	4852.5	4903.2	4951.79	4996.73	5037.34	5073.89	5106.99	5137.69	5166.8	5194.31	5219.96	5244.04	5266.8	5288.45	5309.23	5329.03	5347.21	5362.9
146	Estimates	Ukraine	14	804	37297.6	37815.8	38360.5	38916.3	39471.7	40019.4	40556.5	41084	41606.3	42130.3	42662.1	43203.6	43749.5	44285.9	44794.3	45261.9	45682.3	46060.5	46409	46746.7	47086.8	47433.8	47783	48127.2	48455.1	48759	49036.5	49290.9	49526.9	49751.3	49968.8	50179	50379.4	50570	50750.9	50920.8	51078.8	51221.1	51339.6	51423.5	51464.3	51462.6	51417.4	51317.6	51149.5
147	Estimates	Northern Europe		924	78007.5	78227.4	78502	78817.1	79162.8	79533.2	79926.7	80345.7	80796	81285.5	81820.4	82401	83018.7	83654	84281.1	84880.1	85443	85970.4	86462.7	86923.3	87354.4	87755.9	88124.9	88459.5	88757.6	89018.6	89243.5	89436.3	89604.6	89758	89905.1	90046.9	90186.1	90335	90508.5	90716.5	90966.3	91253.1	91559.9	91862.1	92142	92395	92627.3	92845.4	93060.3
148	Estimates	Channel Islands	15	830	102.234	102.967	103.661	104.323	104.972	105.609	106.268	106.968	107.711	108.525	109.42	110.399	111.457	112.595	113.773	114.995	116.227	117.474	118.726	119.972	121.197	122.413	123.614	124.725	125.682	126.415	126.902	127.183	127.39	127.692	128.212	128.981	129.979	131.156	132.453	133.808	135.23	136.716	138.187	139.53	140.671	141.568	142.258	142.819	143.384
149	Estimates	Denmark		208	4268.27	4308.92	4346.18	4380.3	4411.66	4440.78	4468.35	4495.22	4522.33	4550.68	4581.1	4614.03	4649.35	4686.28	4723.63	4760.46	4796.49	4831.75	4866.07	4899.29	4931.24	4961.76	4990.55	5017.25	5041.42	5062.73	5081.27	5097.05	5109.69	5118.71	5123.94	5125.3	5123.35	5119.61	5116.06	5114.24	5114.66	5117.28	5122.44	5130.36	5141.11	5154.91	5171.65	5190.74	5211.33
150	Estimates	Estonia		233	1100.99	1113.25	1125.24	1136.9	1148.21	1159.23	1170.1	1181.02	1192.25	1204.11	1216.82	1230.5	1245.08	1260.21	1275.44	1290.4	1304.99	1319.24	1333.18	1346.82	1360.2	1373.31	1386.07	1398.47	1410.47	1422.04	1433.18	1443.89	1454.27	1464.42	1474.44	1483.87	1492.64	1501.42	1511.2	1522.4	1536.03	1551.21	1564.19	1569.97	1565.24	1548.21	1520.81	1488.06	1457.09
151	Estimates	Faeroe Islands		234	31.503	31.538	31.672	31.881	32.159	32.496	32.882	33.295	33.743	34.192	34.661	35.115	35.57	36.014	36.454	36.9	37.334	37.768	38.2	38.646	39.083	39.537	40.009	40.486	40.955	41.407	41.848	42.275	42.693	43.101	43.514	43.917	44.307	44.7	45.122	45.573	46.077	46.621	47.117	47.466	47.594	47.457	47.101	46.64	46.25
152	Estimates	Finland	16	246	4008.29	4050.49	4096.55	4144.3	4191.98	4238.27	4282.38	4323.92	4362.91	4399.67	4434.59	4467.77	4498.82	4526.75	4550.24	4568.6	4581.11	4588.66	4594.02	4601.03	4612.37	4629.38	4651.17	4675.46	4698.78	4718.75	4734.44	4746.93	4758.25	4771.35	4788.24	4809.81	4835.1	4862.18	4888.2	4911.22	4930.34	4946.37	4961.09	4977.11	4996.22	5019.12	5044.93	5071.79	5097.1
153	Estimates	Iceland		352	142.659	144.942	147.706	150.82	154.157	157.642	161.198	164.788	168.387	171.991	175.592	179.183	182.711	186.124	189.338	192.313	194.99	197.401	199.669	201.974	204.426	207.088	209.929	212.814	215.563	218.07	220.291	222.266	224.15	226.103	228.262	230.664	233.269	236.019	238.808	241.582	244.331	247.056	249.756	252.413	255.043	257.624	260.151	262.656	265.138
154	Estimates	Ireland		372	2913.09	2921.11	2924.05	2921.36	2913.05	2899.78	2882.85	2864.14	2846.05	2831.25	2822.11	2820.04	2824.95	2835.02	2847.34	2859.95	2872.07	2884.78	2900.18	2921.26	2950	2986.78	3030.39	3079.3	3131.18	3184.13	3237.59	3291.17	3343.15	3391.58	3434.95	3472.89	3505.36	3531.78	3551.65	3564.96	3571.35	3571.76	3569.11	3567.29	3569.26	3576.38	3588.59	3605.66	3626.8
155	Estimates	Isle of Man		833	55.254	55.222	54.852	54.208	53.367	52.408	51.401	50.429	49.566	48.883	48.442	48.281	48.418	48.8	49.391	50.141	51.049	52.118	53.254	54.376	55.425	56.352	57.154	57.9	58.655	59.478	60.428	61.443	62.406	63.151	63.551	63.54	63.191	62.73	62.487	62.696	63.441	64.63	66.047	67.388	68.429	69.096	69.475	69.656	69.818
156	Estimates	Latvia		428	1926.57	1933.99	1945.96	1961.65	1980.39	2001.57	2024.67	2049.32	2075.17	2102	2129.59	2157.66	2185.88	2213.8	2240.95	2266.94	2291.47	2314.5	2336.32	2357.39	2378.02	2398.38	2418.27	2437.18	2454.39	2469.44	2482.18	2492.98	2502.51	2511.74	2521.39	2531.01	2540.44	2550.93	2564.11	2580.75	2602.15	2626.9	2649.82	2663.92	2664.43	2649.15	2620.25	2582.65	2543.62
157	Estimates	Lithuania		440	2567.4	2569.61	2578.05	2591.37	2608.52	2628.74	2651.62	2677	2704.99	2735.87	2769.87	2806.91	2846.39	2887.07	2927.38	2966.16	3002.79	3037.44	3070.69	3103.51	3136.58	3170.07	3203.63	3236.73	3268.64	3298.87	3327.26	3354.06	3379.8	3405.18	3430.76	3456.14	3481.13	3506.54	3533.48	3562.4	3594.06	3627.33	3658.49	3682.56	3696.03	3697.45	3688.1	3670.65	3649.13
158	Estimates	Norway	17	578	3265.27	3300.75	3334.48	3367.05	3398.91	3430.34	3461.51	3492.45	3523.05	3553.13	3582.51	3611.15	3639.21	3667.11	3695.41	3724.46	3754.36	3784.87	3815.64	3846.18	3876.06	3905.27	3933.72	3960.8	3985.74	4008.03	4027.47	4044.33	4059.18	4072.87	4086.08	4098.97	4111.66	4124.59	4138.27	4153.1	4169.32	4186.97	4205.97	4226.12	4247.28	4269.47	4292.68	4316.79	4341.61
159	Estimates	Sweden		752	7009.91	7073.23	7127.52	7175.67	7220.06	7262.62	7304.78	7347.48	7391.25	7436.26	7482.54	7530.18	7579.57	7631.46	7686.73	7745.67	7809.09	7875.91	7942.32	8003.19	8054.92	8095.79	8127.03	8151.6	8173.97	8197.34	8223.25	8250.69	8277.41	8300	8316.34	8325.49	8329.42	8332.44	8340.44	8357.65	8384.99	8421.06	8464.79	8514.21	8567.38	8625.14	8686.74	8746.78	8798.23
160	Estimates	United Kingdom		826	50616	50621.4	50686.1	50797.3	50945.4	51123.7	51328.7	51559.7	51818.6	52109	52433.2	52789.8	53171.3	53562.8	53945	54303.1	54631	54928.5	55194.5	55429.6	55634.9	55809.8	55953.3	56066.8	56152.2	56211.9	56247.4	56262	56263.7	56262.1	56265.5	56276.3	56296.2	56330.9	56386.2	56466.1	56574.3	56709.2	56862.9	57023.7	57183.3	57339.4	57494.5	57650.5	57810.8
161	Estimates	Southern Europe		925	108737	109707	110693	111667	112614	113525	114404	115263	116122	117005	117936	118925	119966	121029	122073	123070	124005	124894	125771	126687	127677	128749	129886	131067	132260	133438	134596	135732	136824	137848	138785	139628	140377	141036	141615	142125	142567	142941	143259	143530	143765	143977	144175	144354	144507
162	Estimates	Albania		8	1263.17	1287.5	1316.09	1348.1	1382.88	1419.97	1459.09	1500.15	1543.22	1588.48	1636.06	1685.9	1737.64	1790.53	1843.59	1896.12	1947.79	1998.69	2049.15	2099.65	2150.6	2202.03	2253.84	2306	2358.46	2411.23	2464.34	2517.87	2571.85	2626.29	2681.24	2735.33	2788.31	2842.62	2901.59	2966.8	3041.01	3121.34	3197.07	3253.66	3281.45	3275.43	3240.59	3189.58	3140.59
163	Estimates	Andorra		20	6.196	6.689	7.247	7.865	8.525	9.232	9.989	10.779	11.615	12.498	13.411	14.375	15.37	16.412	17.469	18.549	19.647	20.758	21.89	23.058	24.276	25.559	26.892	28.232	29.52	30.705	31.777	32.771	33.737	34.818	36.067	37.5	39.114	40.867	42.706	44.6	46.517	48.455	50.434	52.448	54.509	56.671	58.888	60.971	62.677
164	Estimates	Bosnia and Herzegovina		70	2661.3	2710.65	2764.71	2821.31	2878.85	2936.31	2993.27	3049.92	3106.89	3165.19	3225.67	3288.6	3353.23	3417.57	3478.99	3535.64	3586.63	3632.67	3675.45	3717.47	3760.53	3805.28	3851.15	3897.26	3942.22	3985.1	4025.26	4063.19	4100.35	4138.82	4179.85	4222.51	4265.31	4308.11	4350.75	4392.13	4435.5	4478.52	4508.06	4506.65	4463.42	4371.6	4239.15	4088	3948.82
165	Estimates	Croatia		191	3850.3	3886.22	3922.67	3959.12	3995.14	4030.41	4064.77	4098.12	4130.49	4161.96	4192.63	4222.5	4251.42	4279.06	4304.99	4328.92	4350.81	4370.86	4389.32	4406.61	4423.07	4438.81	4453.99	4469.04	4484.52	4500.86	4518.1	4536.2	4555.42	4576.03	4598.13	4621.42	4645.41	4669.61	4693.43	4716.12	4737.95	4758.15	4773.68	4780.63	4776.37	4760	4732.86	4697.53	4657.8
166	Estimates	Gibraltar		292	22.039	22.292	22.494	22.63	22.72	22.775	22.816	22.863	22.959	23.129	23.394	23.786	24.284	24.848	25.454	26.041	26.612	27.174	27.694	28.159	28.56	28.869	29.104	29.278	29.427	29.578	29.742	29.902	30.049	30.177	30.272	30.334	30.381	30.383	30.325	30.207	30.004	29.744	29.469	29.262	29.164	29.212	29.379	29.623	29.895
167	Estimates	Greece		300	7668.79	7743.25	7814.59	7883	7948.52	8011.12	8070.64	8126.81	8179.27	8227.65	8271.79	8311.81	8348.33	8382.6	8416.19	8450.5	8486.43	8524.56	8565.67	8610.47	8659.8	8712.68	8769.76	8835.14	8914.18	9009.92	9124.75	9255.38	9392.11	9521.67	9634.5	9727.72	9804.17	9867.16	9922.43	9974.74	10023.4	10068.3	10115.9	10174.2	10248.5	10341.9	10451.4	10569.4	10684.8
168	Estimates	Holy See	18	336	0.908	0.885	0.882	0.886	0.894	0.908	0.905	0.91	0.912	0.908	0.906	0.903	0.898	0.892	0.879	0.854	0.814	0.766	0.712	0.669	0.644	0.642	0.657	0.686	0.708	0.728	0.737	0.737	0.73	0.73	0.724	0.725	0.729	0.731	0.74	0.746	0.75	0.759	0.764	0.765	0.768	0.774	0.779	0.778	0.778
169	Estimates	Italy		380	46598.6	47021.9	47411.9	47766	48084.8	48372.8	48638.3	48893	49151.5	49429.9	49742.2	50095.6	50487.5	50903.7	51322.6	51728.7	52116	52488.5	52851.2	53212.8	53578.7	53949.9	54321	54682.6	55022.2	55330.7	55604.3	55845.1	56057	56246.8	56419.3	56576.5	56717.1	56838.7	56937.7	57012.4	57061.8	57089.5	57103.1	57113.2	57127.1	57152.5	57188.9	57226.6	57251.4
170	Estimates	Malta		470	312.003	312.283	312.801	313.229	313.37	313.124	312.557	311.816	311.202	311.006	311.534	312.914	315.032	317.447	319.588	321.019	321.606	321.508	320.979	320.414	320.086	320.078	320.317	320.854	321.683	322.821	324.279	326.079	328.201	330.611	333.274	336.193	339.342	342.628	345.948	349.196	352.336	355.387	358.378	361.381	364.431	367.528	370.642	373.784	377.006
171	Estimates	Montenegro		499	394.739	400.872	410.508	421.737	433.135	443.795	453.317	461.809	469.791	478.068	487.413	498.128	509.713	520.714	529.175	533.814	533.908	530.229	524.844	520.647	519.696	522.786	529.21	537.758	546.574	554.262	560.423	565.507	570.056	574.95	580.754	587.687	595.354	602.967	609.431	614.016	616.357	616.797	616.053	615.203	615.002	615.741	617.172	618.852	620.084
172	Estimates	Portugal		620	8416.97	8432.97	8477.26	8537.75	8604.73	8670.88	8731.33	8783.55	8827.14	8863.39	8893.97	8919.6	8938.8	8947.43	8940.09	8914.45	8866.85	8802.56	8739.08	8700.02	8701.85	8750.51	8839.8	8958.96	9091.4	9224.06	9354.49	9483.63	9605.59	9714.16	9804.85	9875.26	9925.73	9958.42	9977.17	9985.58	9983.22	9971.23	9956.67	9948.57	9953.33	9974.19	10009.6	10055	10103.4
173	Estimates	San Marino		674	12.781	12.917	13.092	13.29	13.511	13.772	14.048	14.346	14.669	15.021	15.397	15.789	16.199	16.621	17.032	17.441	17.835	18.229	18.589	18.895	19.138	19.303	19.398	19.466	19.562	19.735	19.98	20.296	20.66	21.03	21.361	21.666	21.943	22.21	22.455	22.708	22.961	23.21	23.466	23.74	24.043	24.386	24.749	25.141	25.516
174	Estimates	Serbia	19	688	6732.26	6853.29	6963.4	7063.16	7153.36	7234.92	7308.93	7376.69	7439.61	7499.17	7556.73	7613.35	7669.61	7725.5	7780.69	7835.08	7888.8	7942.64	7998	8056.66	8119.86	8187.99	8260.62	8337.08	8416.25	8497.17	8579.63	8663.33	8746.98	8829.04	8908.29	8984.59	9057.98	9127.68	9192.92	9253.41	9306.35	9352.15	9397.31	9450.77	9517.67	9602.94	9701.33	9795.55	9861.88
175	Estimates	Slovenia		705	1473.09	1481.63	1491.67	1502.84	1514.78	1527.21	1539.79	1552.25	1564.36	1575.87	1586.64	1596.56	1605.64	1614.02	1621.88	1629.43	1636.67	1643.7	1651.09	1659.55	1669.58	1681.43	1694.97	1709.98	1725.96	1742.62	1759.73	1777.32	1795.65	1815.1	1835.84	1857.85	1880.7	1903.55	1925.31	1945.13	1962.88	1978.52	1991.43	2000.87	2006.48	2007.88	2005.51	2000.77	1995.61
176	Estimates	Spain	20	724	28069.7	28243.6	28442.4	28658.7	28887.3	29125.4	29371.8	29628	29896.9	30182.8	30489.2	30817.6	31165.1	31524.4	31885.4	32241	32587.2	32926.3	33265.2	33614.2	33980.3	34363.9	34760.5	35165.6	35572.5	35975.3	36373.1	36763.5	37137.7	37484.7	37796.8	38071.3	38309.7	38514.1	38688.1	38835.9	38958.1	39057.2	39141.6	39221.7	39306.1	39403.2	39515.5	39638.6	39764.6
177	Estimates	TFYR Macedonia	21	807	1254.44	1290.41	1320.98	1347.46	1370.98	1392.45	1412.61	1432.02	1451.02	1469.84	1488.67	1507.65	1527.11	1547.45	1569.14	1592.43	1617.79	1644.94	1672.4	1698.14	1720.8	1739.52	1754.96	1768.99	1784.4	1803.01	1825.55	1851.07	1877.69	1902.72	1924.2	1941.53	1955.24	1965.89	1974.41	1981.53	1987.54	1992.27	1995.51	1996.87	1996.23	1993.3	1988.66	1984.03	1981.7
178	Estimates	Western Europe		926	142460	143207	144064	144987	145946	146926	147928	148968	150073	151279	152616	154092	155682	157319	158917	160408	161765	162997	164116	165151	166121	167031	167869	168614	169239	169729	170080	170315	170468	170589	170719	170867	171041	171272	171596	172040	172611	173303	174098	174969	175890	176865	177884	178892	179818
179	Estimates	Austria		40	6936.44	6931.34	6931.2	6935.14	6942.62	6953.41	6967.62	6985.72	7008.42	7036.55	7070.77	7111.14	7156.83	7205.99	7256.09	7305.16	7352.24	7397.17	7439.58	7479.35	7516.24	7550.34	7581.12	7607.06	7626.29	7637.69	7640.75	7636.58	7627.76	7617.88	7609.75	7604.51	7602.18	7603.1	7607.29	7614.87	7625.39	7639.35	7658.84	7686.57	7723.95	7772.7	7830.93	7892.09	7947.21
180	Estimates	Belgium		56	8637.52	8680.17	8727.99	8779.27	8832.7	8887.27	8942.4	8997.84	9053.64	9110.07	9167.36	9225.41	9283.54	9340.42	9394.29	9443.94	9488.75	9529.04	9565.59	9599.65	9632.18	9663.32	9692.85	9720.76	9747.02	9771.59	9794.78	9816.7	9836.81	9854.38	9869	9880.59	9889.82	9897.88	9906.37	9916.58	9928.54	9942.29	9959.02	9980.18	10006.5	10039.4	10078.1	10118.7	10155.9
181	Estimates	France		250	41879.6	42070.9	42365.6	42724.2	43117.8	43527.8	43946.2	44375.7	44827.6	45319.1	45865.4	46470.8	47121.4	47781.4	48402.8	48952.3	49411.4	49791.9	50127.1	50466.4	50843.8	51273.5	51739.8	52212.3	52646.2	53010.7	53295.8	53516.2	53696.5	53872.4	54070.8	54298	54547.7	54817.8	55102.7	55397.5	55704.5	56024.5	56348.2	56663.2	56960.8	57237.7	57497	57744.8	57990.7
182	Estimates	Germany		276	69966.2	70299.4	70619.5	70929.3	71233.1	71537.5	71851	72183.9	72548	72955.2	73414.4	73928	74489.1	75080	75676	76255.9	76816.3	77352.7	77841.4	78254.6	78573	78786.6	78901.7	78936.2	78917.2	78866.5	78794.5	78701.8	78589.3	78454.8	78300.6	78126.1	77944.8	77790.1	77704.3	77717.4	77837.5	78054.1	78354	78715.6	79118.3	79564.5	80046.2	80520.1	80931
183	Estimates	Liechtenstein		438	13.758	13.942	14.128	14.338	14.568	14.831	15.112	15.431	15.767	16.126	16.495	16.894	17.29	17.718	18.17	18.649	19.153	19.691	20.236	20.765	21.265	21.726	22.151	22.563	22.981	23.432	23.926	24.44	24.962	25.447	25.866	26.224	26.515	26.765	27.011	27.257	27.524	27.802	28.095	28.407	28.747	29.108	29.497	29.919	30.365
184	Estimates	Luxembourg		442	296.001	297.588	299.496	301.505	303.451	305.261	306.945	308.564	310.257	312.22	314.588	317.441	320.703	324.121	327.366	330.161	332.419	334.227	335.834	337.567	339.668	342.226	345.103	348.173	351.189	353.983	356.564	358.968	361.073	362.789	364.038	364.781	365.098	365.305	365.795	366.884	368.666	371.078	374.118	377.706	381.791	386.352	391.394	396.81	402.433
185	Estimates	Monaco		492	19.996	19.377	19.073	19.053	19.264	19.655	20.182	20.791	21.399	21.974	22.452	22.808	23.039	23.168	23.236	23.282	23.305	23.292	23.304	23.346	23.484	23.72	24.051	24.439	24.835	25.197	25.523	25.809	26.087	26.395	26.745	27.164	27.624	28.095	28.512	28.835	29.041	29.172	29.235	29.312	29.439	29.624	29.863	30.138	30.427
186	Estimates	Netherlands		528	10042	10167.5	10298	10432.3	10569.7	10709.6	10851.9	10996.6	11144.1	11294.7	11448.8	11606.4	11766.7	11928.4	12089.4	12248.3	12404.2	12556.8	12706.8	12855	13001.9	13147.9	13291.9	13431.2	13562.4	13683.3	13793.1	13892.9	13984.1	14068.6	14148.4	14223.8	14295.2	14365.4	14437.5	14513.9	14595.8	14682.6	14774	14868.7	14965.4	15064.5	15165.9	15268	15369.1
187	Estimates	Switzerland		756	4668.09	4726.29	4788.96	4851.98	4912.89	4970.81	5026.67	5083	5143.67	5213.4	5296.12	5393.41	5503	5618.16	5729.46	5829.96	5916.91	5991.68	6056.36	6114.72	6169.36	6221.64	6270.12	6311.48	6341.06	6356.19	6355.23	6341.18	6321.53	6306.54	6303.61	6315.88	6341.55	6377.1	6416.7	6456.22	6494.09	6531.89	6572.27	6619.15	6674.89	6741.07	6815.38	6891.6	6961.26
188	Estimates	LATIN AMERICA AND THE CARIBBEAN		904	168918	173497	178234	183107	188105	193224	198468	203851	209393	215120	221051	227194	233538	240047	246673	253378	260149	266991	273914	280939	288077	295330	302686	310136	317667	325267	332930	340653	348446	356321	364284	372338	380470	388655	396860	405060	413239	421398	429551	437721	445919	454147	462384	470605	478774
189	Estimates	Caribbean		915	17075.7	17395.8	17734.6	18084	18438.8	18796.5	19157.5	19524.8	19903.8	20301.2	20722.9	21171.2	21642.6	22127	22610.5	23082.7	23539.1	23982.6	24419.4	24859.6	25310	25772.8	26244.3	26718.4	27186.1	27641	28081.3	28509.7	28930.3	29349.5	29772	30198.6	30628.3	31062.4	31502.2	31948	32400.7	32859.4	33321	33781.3	34237.3	34687.4	35131.7	35569.3	36000
190	Estimates	Anguilla		660	5.118	5.296	5.446	5.552	5.64	5.7	5.736	5.779	5.807	5.832	5.864	5.899	5.946	5.995	6.06	6.12	6.167	6.232	6.283	6.346	6.403	6.451	6.501	6.556	6.596	6.629	6.66	6.687	6.709	6.713	6.702	6.65	6.588	6.539	6.552	6.662	6.875	7.195	7.574	7.965	8.334	8.666	8.981	9.266	9.537
191	Estimates	Antigua and Barbuda		28	46.303	48.365	49.999	51.262	52.208	52.897	53.42	53.838	54.241	54.722	55.339	56.144	57.144	58.294	59.524	60.781	62.059	63.36	64.655	65.91	67.098	68.188	69.176	70.066	70.878	71.609	72.285	72.875	73.324	73.528	73.442	73.066	72.448	71.639	70.725	69.782	68.809	67.845	67.058	66.627	66.696	67.307	68.427	69.938	71.719
192	Estimates	Aruba		533	38.068	38.267	38.964	40.148	41.76	43.724	45.933	48.241	50.497	52.531	54.211	55.438	56.225	56.695	57.032	57.36	57.715	58.055	58.386	58.726	59.063	59.44	59.84	60.243	60.528	60.657	60.586	60.366	60.103	59.98	60.096	60.567	61.345	62.201	62.836	63.026	62.644	61.833	61.079	61.032	62.149	64.622	68.235	72.504	76.7
193	Estimates	Bahamas		44	79.085	79.985	81.426	83.371	85.773	88.617	91.897	95.603	99.769	104.405	109.528	115.108	121.083	127.333	133.698	140.054	146.366	152.609	158.627	164.248	169.354	173.863	177.839	181.488	185.099	188.882	192.902	197.111	201.513	206.032	210.661	215.396	220.275	225.187	230.015	234.687	239.131	243.393	247.579	251.849	256.336	261.116	266.134	271.165	275.895
194	Estimates	Barbados		52	210.992	215.703	219.636	222.809	225.26	227.073	228.35	229.212	229.83	230.349	230.939	231.678	232.586	233.587	234.547	235.374	236.044	236.621	237.199	237.913	238.848	240.035	241.441	242.976	244.539	246.034	247.444	248.784	250.032	251.177	252.194	253.08	253.841	254.518	255.193	255.924	256.736	257.611	258.527	259.458	260.374	261.275	262.184	263.089	264.015
195	Estimates	British Virgin Islands		92	7.44	7.508	7.565	7.608	7.648	7.684	7.735	7.787	7.849	7.932	8.033	8.155	8.298	8.452	8.627	8.814	9.007	9.218	9.424	9.621	9.803	9.97	10.125	10.264	10.379	10.476	10.543	10.591	10.662	10.792	11.002	11.315	11.712	12.188	12.731	13.304	13.938	14.589	15.266	15.9	16.461	16.934	17.344	17.703	18.052
196	Estimates	Caribbean Netherlands	22	535	7.122	7.293	7.425	7.526	7.608	7.67	7.725	7.783	7.854	7.952	8.074	8.24	8.427	8.645	8.881	9.134	9.377	9.646	9.9	10.141	10.359	10.546	10.708	10.841	10.949	11.027	11.076	11.098	11.103	11.135	11.21	11.322	11.472	11.652	11.848	12.025	12.187	12.325	12.482	12.699	13.019	13.429	13.934	14.443	14.863
197	Estimates	Cayman Islands		136	6.417	6.271	6.245	6.318	6.467	6.677	6.92	7.181	7.432	7.67	7.865	8.026	8.146	8.227	8.298	8.369	8.441	8.521	8.631	8.827	9.144	9.581	10.136	10.784	11.498	12.244	13.022	13.841	14.661	15.444	16.162	16.789	17.356	17.906	18.543	19.313	20.251	21.339	22.538	23.776	25.01	26.213	27.404	28.646	30.055
198	Estimates	Cuba		192	5919.99	6051.29	6180.03	6304.52	6424.17	6539.47	6652.09	6764.79	6881.21	7005.48	7141.14	7289.83	7450.4	7618.35	7787.15	7951.93	8110.43	8263.55	8413.33	8563.19	8715.12	8869.96	9025.3	9176.05	9315.37	9438.44	9544.27	9634.68	9711.39	9777.29	9835.18	9884.21	9925.62	9966.73	10017.1	10083	10168.1	10269.6	10379.5	10486.5	10582.1	10663.6	10733.4	10794.1	10850.6
199	Estimates	Curaçao		531	100.179	104.567	108.284	111.504	114.346	116.916	119.278	121.465	123.484	125.309	126.941	128.378	129.682	130.949	132.322	133.878	135.65	137.609	139.68	141.717	143.634	145.447	147.152	148.618	149.683	150.258	150.24	149.715	148.929	148.277	147.996	148.21	148.814	149.58	150.187	150.377	150.057	149.324	148.354	147.41	146.671	146.239	146.021	145.764	145.125
200	Estimates	Dominica		212	51.1	51.706	52.301	52.947	53.688	54.56	55.547	56.63	57.772	58.922	60.011	61.032	61.982	62.918	63.926	65.038	66.311	67.686	69.04	70.213	71.073	71.569	71.734	71.744	71.807	72.094	72.642	73.411	74.242	74.925	75.314	75.375	75.17	74.747	74.213	73.643	73.025	72.37	71.742	71.242	70.926	70.842	70.97	71.21	71.373
201	Estimates	Dominican Republic		214	2364.65	2438.41	2517.26	2600.8	2688.7	2780.65	2876.43	2975.81	3078.63	3184.76	3294.04	3406.3	3521.28	3638.63	3757.96	3878.95	4001.38	4125.11	4250.02	4376.05	4503.11	4631.11	4759.93	4889.44	5019.47	5149.94	5280.72	5411.86	5543.52	5675.93	5809.27	5943.59	6078.82	6214.86	6351.57	6488.86	6626.54	6764.62	6903.32	7042.94	7183.65	7325.62	7468.55	7611.47	7753.05
202	Estimates	Grenada		308	76.681	76.624	77.137	78.103	79.432	81.024	82.8	84.648	86.493	88.252	89.869	91.26	92.425	93.35	94.066	94.581	94.875	94.961	94.868	94.682	94.426	94.185	93.934	93.63	93.152	92.448	91.437	90.184	89.073	88.568	89.005	90.572	93.091	95.985	98.439	99.906	100.143	99.38	98.062	96.869	96.283	96.454	97.198	98.305	99.405
203	Estimates	Guadeloupe	23	312	210.003	213.072	217.266	222.565	228.879	236.064	243.876	252.058	260.231	268.042	275.161	281.409	286.761	291.451	295.833	300.171	304.524	308.767	312.783	316.346	319.334	321.753	323.722	325.224	326.285	326.966	327.2	327.128	327.224	328.095	330.177	333.625	338.296	343.892	349.971	356.171	362.461	368.86	375.08	380.825	385.878	390.069	393.465	396.429	399.47
204	Estimates	Haiti		332	3221.28	3275.37	3331.58	3390.05	3450.85	3514.07	3579.72	3647.81	3718.28	3791.1	3866.16	3943.36	4022.59	4103.73	4186.64	4271.13	4357.48	4445.53	4534.23	4622.21	4708.64	4793.15	4876.56	4960.66	5047.94	5140.36	5238.24	5341.42	5450.55	5566.27	5688.84	5818.67	5955.27	6096.69	6240.33	6384.19	6527.54	6670.57	6813.35	6956.3	7099.73	7243.39	7386.98	7530.7	7674.91
205	Estimates	Jamaica		388	1402.9	1436.94	1468.02	1495.67	1519.79	1540.62	1558.82	1575.36	1591.51	1608.72	1628.25	1650.81	1676.25	1703.39	1730.49	1756.27	1780.26	1803.06	1825.63	1849.41	1875.38	1904.02	1934.83	1966.7	1998.03	2027.74	2055.09	2080.54	2105.66	2132.69	2163.05	2197.58	2235.33	2273.67	2308.95	2338.64	2361.72	2379.28	2393.53	2407.72	2424.24	2443.69	2465.36	2488.78	2513.05
206	Estimates	Martinique		474	222.002	224.42	228.272	233.269	239.146	245.676	252.655	259.88	267.211	274.49	281.622	288.485	294.968	300.954	306.371	311.127	315.173	318.504	321.178	323.319	325.011	326.333	327.3	327.897	328.072	327.838	327.166	326.19	325.286	324.929	325.454	326.993	329.445	332.605	336.167	339.876	343.743	347.763	351.716	355.34	358.449	360.9	362.755	364.377	366.248
207	Estimates	Montserrat		500	13.519	14.126	14.492	14.629	14.55	14.297	13.9	13.42	12.923	12.457	12.102	11.88	11.799	11.809	11.841	11.84	11.812	11.755	11.695	11.649	11.625	11.636	11.66	11.687	11.734	11.781	11.827	11.881	11.921	11.944	11.92	11.846	11.749	11.61	11.461	11.324	11.179	11.028	10.888	10.785	10.73	10.766	10.851	10.886	10.717
208	Estimates	Puerto Rico		630	2218	2209.7	2212.1	2221.02	2233.41	2247.41	2262.42	2278.96	2298.57	2323.45	2355.57	2395.61	2442.15	2491.28	2537.64	2577.52	2609.27	2634.36	2656.3	2680.22	2709.84	2745.97	2787.35	2833.13	2881.75	2931.89	2983.58	3036.75	3089.76	3140.56	3187.67	3230.47	3269.25	3304.68	3337.86	3369.68	3400.02	3428.83	3457.21	3486.63	3517.97	3551.59	3586.88	3622.71	3657.41
209	Estimates	Saint Kitts and Nevis		659	46.049	46.143	46.489	47.053	47.737	48.492	49.251	49.955	50.544	50.972	51.195	51.193	50.966	50.525	49.93	49.214	48.358	47.38	46.402	45.534	44.885	44.495	44.326	44.316	44.331	44.276	44.148	43.942	43.703	43.457	43.21	42.976	42.762	42.542	42.294	42.013	41.697	41.351	41.047	40.852	40.834	41.013	41.361	41.846	42.373
210	Estimates	Saint Lucia		662	82.784	83.874	84.763	85.491	86.106	86.654	87.178	87.719	88.33	89.044	89.897	90.914	92.084	93.399	94.814	96.302	97.881	99.527	101.179	102.749	104.16	105.39	106.455	107.466	108.532	109.769	111.208	112.831	114.546	116.29	117.987	119.594	121.154	122.74	124.468	126.418	128.619	131.034	133.533	135.956	138.185	140.156	141.925	143.565	145.247
211	Estimates	Saint Vincent and the Grenadines		670	66.998	68.059	69.271	70.593	72.022	73.523	75.08	76.635	78.168	79.618	80.949	82.142	83.206	84.167	85.069	85.97	86.857	87.736	88.613	89.516	90.452	91.44	92.463	93.517	94.568	95.611	96.641	97.649	98.633	99.59	100.505	101.379	102.204	102.984	103.742	104.477	105.198	105.896	106.536	107.084	107.505	107.814	108.003	108.092	108.129
212	Estimates	Sint Maarten (Dutch part)		534	1.499	1.665	1.799	1.912	2.009	2.108	2.213	2.322	2.463	2.629	2.833	3.077	3.373	3.696	4.067	4.46	4.896	5.365	5.859	6.356	6.864	7.375	7.896	8.428	8.975	9.557	10.161	10.797	11.481	12.249	13.096	14.019	15.002	16.12	17.452	19.028	20.898	23.007	25.155	27.06	28.549	29.534	30.09	30.339	30.471
213	Estimates	Trinidad and Tobago		780	645.635	658.833	675.741	695.465	717.156	740.035	763.354	786.433	808.663	829.489	848.479	865.36	880.023	892.569	903.275	912.417	919.903	925.909	931.468	937.848	945.993	956.366	968.741	982.592	997.053	1011.49	1025.66	1039.76	1054.12	1069.2	1085.31	1102.56	1120.61	1138.68	1155.69	1170.93	1184.05	1195.25	1204.89	1213.62	1221.9	1229.91	1237.49	1244.41	1250.32
214	Estimates	Turks and Caicos Islands		796	5.051	4.987	4.981	5.014	5.093	5.197	5.315	5.446	5.559	5.656	5.726	5.763	5.763	5.74	5.71	5.672	5.629	5.59	5.559	5.571	5.633	5.756	5.922	6.126	6.346	6.548	6.723	6.886	7.053	7.264	7.519	7.858	8.244	8.669	9.095	9.506	9.875	10.224	10.582	11.017	11.552	12.206	12.968	13.789	14.597
215	Estimates	United States Virgin Islands		850	26.797	27.374	28.122	28.822	29.349	29.682	29.856	30.055	30.491	31.439	33.135	35.716	39.071	42.901	46.726	50.233	53.255	55.919	58.478	61.321	64.726	68.764	73.274	77.983	82.477	86.47	89.848	92.687	95.075	97.166	99.08	100.872	102.474	103.821	104.771	105.28	105.29	104.89	104.309	103.856	103.756	104.089	104.794	105.723	106.646
216	Estimates	Central America		916	38057.2	39144.1	40298.4	41515.2	42790.1	44119.7	45501.3	46932.9	48413.4	49942.2	51519.1	53144	54816.2	56535.1	58299.5	60109.6	61960	63851.6	65798.5	67819.4	69925.4	72121.4	74395.6	76720.2	79057.7	81379.5	83676.1	85950.6	88203.8	90440.6	92665.3	94877.4	97075.8	99263.9	101447	103629	105808	107985	110183	112426	114731	117108	119544	122007	124451
217	Estimates	Belize		84	68.919	71.241	73.427	75.56	77.687	79.87	82.141	84.509	86.956	89.49	92.064	94.703	97.384	100.164	103.069	106.119	109.347	112.692	116.061	119.261	122.182	124.793	127.15	129.294	131.307	133.26	135.147	136.989	138.965	141.305	144.155	147.566	151.5	155.822	160.347	164.921	169.568	174.32	179.028	183.469	187.552	191.126	194.317	197.616	201.674
218	Estimates	Costa Rica		188	959.495	986.156	1015.88	1048.21	1082.88	1119.62	1158.32	1198.94	1241.55	1286.23	1333.04	1381.92	1432.59	1484.51	1537.04	1589.62	1642.19	1694.71	1746.87	1798.31	1848.87	1898.36	1947.05	1995.74	2045.58	2097.41	2151.5	2207.72	2266.15	2326.7	2389.31	2454.13	2521.17	2589.93	2659.78	2730.23	2800.99	2872.21	2944.56	3018.95	3095.99	3175.65	3257.47	3341	3425.69
219	Estimates	El Salvador		222	2199.9	2236.58	2278.31	2324.56	2374.97	2429.33	2487.59	2549.83	2616.28	2687.23	2762.9	2843.24	2927.86	3015.89	3106.19	3197.86	3290.41	3383.7	3477.74	3572.71	3668.59	3765.17	3861.93	3958.32	4053.71	4147.52	4239.68	4329.96	4417.52	4501.32	4580.7	4655.36	4725.72	4792.9	4858.53	4923.86	4988.94	5053.71	5119.03	5185.94	5254.98	5326.66	5400.33	5474	5544.94
220	Estimates	Guatemala		320	3114.96	3212.33	3311.54	3413.16	3517.65	3625.3	3736.24	3850.43	3967.74	4087.92	4210.75	4336.14	4464.25	4595.51	4730.54	4869.72	5013.15	5160.61	5311.61	5465.51	5621.79	5780.48	5941.57	6104.53	6268.71	6433.73	6599.21	6765.52	6933.91	7106.15	7283.46	7466.49	7654.82	7847.47	8042.9	8240.06	8438.6	8639.11	8842.58	9050.47	9263.81	9483.27	9708.54	9938.69	10172.3
221	Estimates	Honduras		340	1546.72	1588.56	1631.73	1676.5	1723.01	1771.35	1821.54	1873.5	1927.1	1982.19	2038.64	2096.41	2155.65	2216.71	2280.05	2346.01	2414.81	2486.41	2560.73	2637.52	2716.66	2798.12	2882.11	2968.99	3059.25	3153.26	3251.16	3352.84	3458.1	3566.66	3678.29	3792.94	3910.66	4031.35	4154.89	4281.19	4410.16	4541.8	4676.36	4814.14	4955.33	5099.95	5247.84	5398.81	5552.62
222	Estimates	Mexico		484	28012.6	28836.1	29711.6	30634.2	31599.8	32605.2	33648	34726.7	35840.6	36989.7	38174.1	39394.1	40649.6	41939.9	43264.3	44623	46011	47429.8	48894	50423.5	52029.9	53718.7	55478.2	57280.6	59088.2	60872.4	62623.8	64345.9	66039.5	67709.7	69360.9	70992.2	72602.5	74196.5	75780.6	77360.7	78934.1	80503.1	82083.9	83697.9	85357.9	87071.5	88828.3	90600.5	92349.1
223	Estimates	Nicaragua		558	1294.99	1331.74	1371.52	1414.28	1459.85	1508.03	1558.47	1610.82	1664.61	1719.37	1774.7	1830.4	1886.56	1943.59	2002.12	2062.63	2125.24	2189.88	2256.78	2326.14	2398.1	2472.66	2549.77	2629.51	2711.85	2796.75	2884.16	2973.81	3065.12	3157.36	3249.91	3342.67	3435.53	3527.94	3619.25	3709.09	3796.92	3882.94	3968.45	4055.26	4144.56	4236.8	4331.28	4426.58	4520.73
224	Estimates	Panama		591	859.659	881.344	904.386	928.712	954.268	981.032	1008.98	1038.13	1068.47	1100.07	1132.92	1167.04	1202.37	1238.82	1276.28	1314.63	1353.8	1393.8	1434.66	1476.48	1519.3	1563.12	1607.83	1653.26	1699.11	1745.2	1791.45	1837.89	1884.52	1931.39	1978.58	2026.07	2073.84	2121.94	2170.41	2219.28	2268.57	2318.33	2368.62	2419.49	2471.01	2523.18	2576.02	2629.64	2684.18
225	Estimates	South America		931	113785	116957	120201	123508	126876	130307	133809	137393	141076	144876	148808	152879	157079	161385	165763	170186	174650	179156	183696	188260	192842	197436	202046	206698	211423	216247	221172	226193	231312	236531	241847	247262	252766	258328	263911	269482	275030	280553	286048	291514	296951	302351	307708	313029	318323
226	Estimates	Argentina		32	17150.3	17507.1	17866.1	18224.2	18579	18929.3	19274.5	19614.8	19951.3	20285.5	20619.1	20953.1	21287.7	21621.8	21953.9	22283.4	22608.7	22932.2	23261.3	23606	23973.1	24366.4	24782.9	25213.4	25644.5	26067	26477.2	26878.6	27277.7	27684.5	28105.9	28543.4	28994	29454.7	29920.9	30388.8	30857.2	31326.5	31795.5	32263.6	32729.7	33193.9	33655.2	34110.9	34558.1
227	Estimates	Bolivia (Plurinational State of)		68	3089.65	3140.34	3193.29	3248.46	3305.84	3365.36	3427	3490.68	3556.36	3623.97	3693.45	3764.81	3838.1	3913.39	3990.86	4070.59	4152.67	4237.12	4324.06	4413.59	4505.78	4600.59	4698.08	4798.51	4902.17	5009.26	5119.83	5233.68	5350.32	5469.12	5589.57	5711.6	5835.18	5959.96	6085.5	6211.55	6337.89	6464.73	6592.79	6723.05	6856.24	6992.52	7131.71	7273.82	7418.86
228	Estimates	Brazil		76	53974.7	55619.2	57307.5	59030.9	60784.9	62569.2	64387.8	66248.9	68164	70146.5	72207.6	74351.8	76573.2	78854	81168.7	83498	85837.8	88191.4	90557.1	92935.1	95326.8	97729	100144	102584	105069	107612	110213	112868	115578	118343	121160	124031	126947	129882	132801	135676	138499	141273	144002	146692	149352	151977	154564	157133	159705
229	Estimates	Chile		152	6188.28	6327.09	6467.64	6610.73	6756.97	6906.84	7060.66	7218.59	7380.64	7546.71	7716.62	7890.16	8067.14	8247.42	8430.84	8617.08	8806.14	8997.33	9188.82	9378.24	9563.86	9745.19	9922.56	10096.3	10267.1	10435.5	10601.8	10766.4	10930.8	11096.9	11266.2	11439.1	11615.8	11797.5	11985.7	12181	12384.1	12594.1	12809	13025.8	13242.1	13457.2	13671	13882.7	14091.4
230	Estimates	Colombia		170	12340.9	12700	13064.7	13438.6	13824.7	14225.2	14641.7	15075.3	15526.4	15994.9	16480.4	16982.3	17500.2	18033.5	18582	19144.2	19721.5	20311.4	20905.1	21490.9	22061.2	22612	23146.8	23674.5	24208	24757	25323.4	25905.1	26502.2	27113.5	27737.9	28376	29027.2	29687.1	30350.1	31011.7	31669.8	32324.3	32975.5	33624.4	34271.6	34916.8	35558.7	36195.2	36823.5
231	Estimates	Ecuador		218	3470.16	3561.15	3655.01	3752.14	3852.86	3957.49	4066.24	4179.32	4296.83	4418.89	4545.55	4676.86	4812.89	4953.73	5099.47	5250.12	5405.69	5566.06	5730.91	5899.85	6072.53	6248.84	6428.71	6611.92	6798.21	6987.39	7179.4	7374.23	7571.96	7772.65	7976.44	8183.19	8392.94	8606.21	8823.75	9045.98	9272.91	9504.13	9739.18	9977.38	10218.1	10461	10705.7	10951.2	11196.5
232	Estimates	Falkland Islands (Malvinas)		238	2.259	2.249	2.24	2.219	2.21	2.204	2.185	2.18	2.165	2.152	2.15	2.125	2.115	2.109	2.087	2.078	2.058	2.036	2.026	2.008	2.001	1.971	1.969	1.939	1.935	1.917	1.903	1.886	1.876	1.865	1.848	1.853	1.843	1.847	1.85	1.855	1.865	1.881	1.906	1.941	1.989	2.063	2.142	2.236	2.333
233	Estimates	French Guiana		254	25.472	26.247	26.892	27.465	27.987	28.49	29.027	29.621	30.303	31.095	32.032	33.121	34.377	35.765	37.287	38.892	40.623	42.443	44.31	46.153	47.93	49.629	51.269	52.88	54.52	56.223	57.995	59.872	61.931	64.281	66.977	70.029	73.42	77.233	81.562	86.439	91.939	97.978	104.226	110.263	115.784	120.681	125.083	129.163	133.189
234	Estimates	Guyana		328	406.559	418.674	432.818	448.464	465.172	482.555	500.324	518.259	536.218	554.092	571.819	589.274	606.285	622.575	637.845	651.868	664.521	675.871	686.146	695.745	704.934	713.684	721.948	729.916	737.847	745.841	754.101	762.424	770.125	776.254	780.153	781.732	781.246	778.948	775.219	770.435	764.459	757.506	750.731	745.665	743.309	744.289	748.134	753.484	758.342
235	Estimates	Paraguay		600	1473.25	1511.77	1550.76	1590.5	1631.19	1673.01	1716.11	1760.58	1806.52	1853.94	1902.88	1953.33	2005.34	2058.91	2114.09	2170.86	2229.38	2289.58	2350.9	2412.57	2474.11	2535.36	2596.74	2659.09	2723.52	2790.96	2861.58	2935.38	3012.83	3094.48	3180.63	3271.46	3366.72	3465.79	3567.75	3671.83	3777.76	3885.44	3994.33	4103.91	4213.74	4323.41	4432.74	4541.9	4651.23
236	Estimates	Peru		604	7727.73	7924.21	8128.52	8340.38	8559.72	8786.76	9021.96	9266.08	9520.05	9784.91	10061.5	10350.2	10650.7	10961.5	11281	11607.7	11941.3	12282.1	12629.3	12982.4	13341.1	13704.3	14072.5	14447.6	14832.8	15229.9	15639.9	16061.3	16491.1	16924.8	17359.1	17792.5	18225.7	18660.4	19099.6	19545	19996.3	20451.7	20909.9	21368.9	21826.7	22283.1	22737.1	23184.2	23619.4
237	Estimates	Suriname		740	215.002	222.679	229.652	236.347	243.088	250.088	257.485	265.273	273.382	281.668	289.966	298.188	306.328	314.528	322.997	331.793	341.133	350.751	359.733	366.848	371.273	372.623	371.324	368.344	365.099	362.654	361.364	361.043	361.457	362.125	362.777	363.325	364.032	365.3	367.66	371.47	376.867	383.654	391.391	399.492	407.472	415.216	422.763	430.039	437.037
238	Estimates	Uruguay		858	2238.51	2261.34	2286.26	2313.21	2342.04	2372.57	2404.5	2437.5	2471.15	2505.01	2538.65	2571.69	2603.89	2635.13	2665.39	2694.54	2722.88	2750.09	2774.77	2795.05	2809.8	2818.27	2821.44	2822.08	2824.07	2830.17	2841.43	2857.11	2875.97	2896.02	2915.78	2935.04	2954.28	2973.46	2992.64	3011.91	3031.04	3049.97	3069.1	3088.98	3109.99	3132.05	3154.86	3178.16	3201.61
239	Estimates	Venezuela (Bolivarian Republic of)		862	5481.98	5735.17	5989.55	6244.65	6500.64	6758.37	7019.41	7285.97	7560.82	7846.95	8146.85	8461.68	8790.59	9130.35	9476.25	9824.69	10175.1	10528.1	10882	11235.5	11587.8	11937.8	12286.4	12637	12994	13361	13739.1	14127.8	14525.9	14931.7	15343.9	15761.8	16185.9	16617.3	17057.8	17508.1	17968.6	18437.8	18912.5	19388.3	19862	20332.1	20799.1	21263.4	21726.4
240	Estimates	NORTHERN AMERICA		905	172603	175070	177874	180941	184201	187594	191062	194557	198036	201463	204807	208043	211152	214121	216941	219612	222122	224480	226731	228937	231145	233371	235615	237880	240166	242472	244807	247177	249576	251990	254414	256844	259289	261757	264263	266816	269426	272093	274809	277561	280345	283143	285962	288856	291892
241	Estimates	Bermuda		60	37.26	37.814	38.478	39.198	39.966	40.755	41.562	42.394	43.233	44.075	44.946	45.834	46.725	47.603	48.435	49.209	49.914	50.558	51.147	51.72	52.286	52.856	53.43	53.978	54.508	54.99	55.431	55.849	56.236	56.616	56.992	57.371	57.746	58.134	58.525	58.92	59.324	59.731	60.14	60.538	60.93	61.312	61.677	62.034	62.381
242	Estimates	Canada		124	13733.4	14098.7	14482.1	14884.2	15303.9	15738.4	16182.9	16631	17074.9	17506.1	17917.2	18304.4	18668.6	19016.7	19359.2	19703.9	20052	20401.1	20751.4	21102.2	21452.7	21804.3	22156.2	22503.2	22838.2	23156.2	23456.5	23741.6	24014.1	24278	24537.4	24791.1	25040.9	25296.8	25571.7	25873.9	26208.1	26569.8	26947.8	27326.2	27692.7	28044.6	28384.3	28711.3	29026.2
243	Estimates	Greenland		304	22.996	23.473	23.938	24.469	25.093	25.846	26.718	27.731	28.85	30.017	31.239	32.471	33.73	35.043	36.445	37.964	39.61	41.361	43.097	44.699	46.074	47.186	48.077	48.738	49.234	49.586	49.78	49.844	49.86	49.946	50.179	50.584	51.157	51.829	52.534	53.19	53.797	54.373	54.878	55.295	55.604	55.789	55.861	55.848	55.815
244	Estimates	Saint Pierre and Miquelon		666	4.571	4.603	4.633	4.66	4.691	4.723	4.766	4.8	4.841	4.882	4.918	4.953	4.978	5.005	5.046	5.096	5.152	5.215	5.287	5.373	5.459	5.55	5.642	5.74	5.813	5.883	5.925	5.957	5.97	5.987	6.001	6.02	6.043	6.052	6.076	6.109	6.14	6.18	6.212	6.251	6.276	6.294	6.306	6.304	6.307
245	Estimates	United States of America		840	158804	160905	163325	165988	168828	171784	174806	177851	180884	183878	186808	189655	192398	195016	197492	199816	201975	203982	205880	207733	209588	211462	213352	215269	217218	219205	221239	223324	225450	227600	229763	231939	234133	236344	238574	240824	243099	245403	247740	250113	252530	254975	257454	260020	262742
246	Estimates	OCEANIA		909	12647.8	12971.3	13275.6	13572.5	13870.9	14176.7	14492.8	14819.1	15152.9	15489.6	15825.2	16157.9	16490.2	16830	17188.1	17571.2	17982.6	18417	18861.9	19299.8	19718	20113.7	20489.7	20846.1	21184.3	21506.9	21811.9	22101.7	22387.8	22685.2	23005.1	23351.6	23722.3	24113.3	24517.5	24929.4	25348.4	25775.2	26206.7	26639.7	27071.5	27501.3	27929	28353.1	28772.1
247	Estimates	Australia/New Zealand		927	10085.3	10360.5	10613.8	10857.1	11099.7	11347.3	11602.7	11865.7	12133.1	12400.2	12662.3	12917.6	13168.9	13424.4	13695.7	13990	14310.5	14652	15001.9	15342.7	15661.3	15955	16226.6	16475.8	16704.2	16913.8	17103.2	17274.5	17438.3	17608.5	17795.7	18003.3	18229.6	18473.1	18730.2	18997.9	19276.5	19565.7	19860.2	20153.3	20439.6	20718	20989.1	21251.9	21506
248	Estimates	Australia	24	36	8177.34	8412.6	8620.97	8816.9	9011.19	9210.91	9419.27	9635.83	9856.95	10076.7	10289.7	10493.6	10691.7	10894.3	11115.2	11363.3	11643.5	11949.4	12265.1	12568.3	12842.9	13084.2	13296.9	13486.4	13662	13831.2	13994.6	14152.1	14309.3	14473.2	14649.1	14838.5	15041.1	15257.4	15487.2	15729.6	15986.2	16254.9	16527.4	16792.3	17041.4	17271.9	17485.9	17687.5	17882.7
249	Estimates	New Zealand		554	1908	1947.93	1992.8	2040.23	2088.48	2136.39	2183.46	2229.83	2276.13	2323.41	2372.59	2424.07	2477.2	2530.17	2580.53	2626.64	2667.08	2702.68	2736.83	2774.37	2818.39	2870.82	2929.69	2989.41	3042.18	3082.63	3108.57	3122.41	3128.96	3135.3	3146.62	3164.83	3188.54	3215.73	3243.04	3268.24	3290.3	3310.74	3332.79	3360.96	3398.17	3446.17	3503.18	3564.46	3623.28
250	Estimates	Melanesia		928	2165.34	2203.57	2244.83	2288.86	2335.45	2384.38	2435.63	2489.14	2544.92	2603.08	2663.68	2726.8	2792.35	2860.25	2930.28	3002.43	3076.56	3152.83	3231.69	3313.64	3399.12	3488.29	3581.07	3677.23	3776.4	3878.33	3982.7	4089.55	4199.42	4313.14	4431.11	4553.9	4680.89	4809.9	4937.98	5063.19	5184.59	5303.2	5421.46	5542.85	5669.95	5803.5	5942.77	6087.29	6235.97
251	Estimates	Fiji		242	288.988	296.209	304.814	314.351	324.482	334.976	345.744	356.82	368.319	380.451	393.386	407.156	421.577	436.208	450.45	463.883	476.324	487.913	498.892	509.658	520.529	531.601	542.814	554.107	565.388	576.595	587.52	598.259	609.345	621.538	635.255	650.955	668.198	685.391	700.366	711.661	718.548	721.725	722.917	724.624	728.628	735.473	744.531	755.026	765.667
252	Estimates	New Caledonia		540	64.825	64.256	64.408	65.126	66.278	67.748	69.468	71.376	73.449	75.678	78.056	80.584	83.218	85.905	88.579	91.2	93.686	96.071	98.609	101.62	105.324	109.83	114.984	120.432	125.642	130.264	134.171	137.467	140.265	142.76	145.144	147.415	149.56	151.655	153.77	155.982	158.313	160.788	163.484	166.465	169.787	173.488	177.525	181.825	186.264
253	Estimates	Papua New Guinea		598	1674.04	1702.37	1731.23	1761.05	1792.14	1824.71	1858.88	1894.68	1931.99	1970.69	2010.68	2051.95	2094.69	2139.3	2186.34	2236.21	2289.11	2344.98	2403.59	2464.55	2527.59	2592.63	2659.85	2729.58	2802.24	2878.16	2957.34	3039.66	3125.03	3213.36	3304.47	3398.47	3495.2	3594	3694.04	3794.72	3895.85	3997.7	4100.73	4205.65	4313.06	4423.01	4535.52	4651.17	4770.61
254	Estimates	Solomon Islands		90	89.794	91.809	94.077	96.56	99.215	102.024	104.965	108.018	111.182	114.465	117.866	121.396	125.064	128.866	132.782	136.847	141.026	145.351	149.921	154.875	160.29	166.212	172.598	179.349	186.332	193.445	200.64	207.937	215.347	222.897	230.607	238.479	246.493	254.596	262.709	270.801	278.838	286.863	294.964	303.253	311.84	320.753	329.953	339.456	349.225
255	Estimates	Vanuatu		548	47.697	48.923	50.297	51.771	53.33	54.924	56.565	58.245	59.983	61.794	63.699	65.713	67.808	69.964	72.131	74.289	76.413	78.522	80.673	82.94	85.389	88.022	90.823	93.765	96.796	99.872	103.028	106.222	109.429	112.58	115.632	118.58	121.435	124.249	127.092	130.027	133.038	136.125	139.366	142.849	146.634	150.778	155.243	159.814	164.208
256	Estimates	Micronesia		954	155.095	158.15	161.223	164.332	167.56	170.908	174.486	178.265	182.318	186.655	191.284	196.213	201.439	206.912	212.623	218.436	224.421	230.554	236.668	242.519	247.984	253.012	257.685	262.198	266.792	271.704	276.969	282.57	288.753	295.701	303.614	312.556	322.451	333.109	344.206	355.555	367.042	378.627	390.234	401.806	413.304	424.603	435.611	446.182	456.148
257	Estimates	Guam		316	59.651	60.262	60.877	61.471	62.053	62.641	63.258	63.926	64.697	65.619	66.742	68.072	69.604	71.286	73.051	74.83	76.607	78.404	80.217	82.04	83.877	85.726	87.587	89.464	91.377	93.352	95.385	97.477	99.63	101.844	104.133	106.485	108.906	111.402	113.961	116.572	119.232	121.919	124.673	127.522	130.482	133.558	136.692	139.818	142.802
258	Estimates	Kiribati		296	33.048	33.623	34.286	35.007	35.777	36.596	37.455	38.346	39.268	40.24	41.233	42.257	43.302	44.363	45.425	46.453	47.459	48.437	49.388	50.294	51.178	52.025	52.824	53.604	54.38	55.169	55.977	56.81	57.662	58.506	59.339	60.133	60.92	61.768	62.765	64.003	65.518	67.261	69.098	70.86	72.412	73.7	74.769	75.719	76.671
259	Estimates	Marshall Islands		584	13.001	13.222	13.438	13.624	13.784	13.894	13.993	14.083	14.208	14.39	14.662	15.051	15.547	16.114	16.71	17.284	17.842	18.388	18.961	19.622	20.395	21.313	22.341	23.439	24.531	25.576	26.552	27.47	28.405	29.418	30.576	31.893	33.33	34.892	36.561	38.333	40.204	42.153	44.063	45.814	47.298	48.475	49.378	50.048	50.575
260	Estimates	Micronesia (Fed. States of)		583	32.001	33.408	34.6	35.693	36.777	37.893	39.093	40.373	41.727	43.126	44.537	45.955	47.388	48.876	50.487	52.242	54.199	56.319	58.403	60.17	61.431	62.108	62.298	62.29	62.476	63.144	64.386	66.105	68.222	70.55	72.964	75.462	78.059	80.678	83.24	85.686	87.948	90.02	92.021	94.091	96.331	98.799	101.413	103.934	106.057
261	Estimates	Nauru		520	2.954	3.057	3.194	3.337	3.481	3.619	3.756	3.9	4.051	4.232	4.433	4.676	4.948	5.228	5.5	5.74	5.933	6.103	6.237	6.371	6.496	6.617	6.743	6.863	6.972	7.068	7.15	7.232	7.309	7.397	7.488	7.592	7.717	7.854	8.005	8.173	8.353	8.554	8.755	8.954	9.155	9.348	9.546	9.719	9.857
262	Estimates	Northern Mariana Islands		580	6.999	7.081	7.215	7.409	7.674	8.01	8.407	8.835	9.28	9.689	10.035	10.302	10.499	10.667	10.857	11.105	11.435	11.823	12.257	12.691	13.127	13.569	14.04	14.492	14.859	15.117	15.234	15.251	15.372	15.862	16.92	18.604	20.856	23.503	26.302	29.092	31.802	34.48	37.134	39.808	42.538	45.249	47.919	50.602	53.38
263	Estimates	Palau		585	7.441	7.497	7.613	7.791	8.014	8.255	8.524	8.802	9.087	9.359	9.642	9.9	10.151	10.378	10.593	10.782	10.946	11.08	11.205	11.331	11.48	11.654	11.852	12.046	12.197	12.278	12.285	12.225	12.153	12.124	12.194	12.387	12.663	13.012	13.372	13.696	13.985	14.24	14.49	14.757	15.088	15.474	15.894	16.342	16.806
264	Estimates	Polynesia	25	957	241.999	249.045	255.756	262.137	268.224	274.122	279.975	286.025	292.531	299.759	307.955	317.237	327.483	338.385	349.487	360.414	371.1	381.568	391.587	400.978	409.638	417.42	424.391	430.787	436.905	442.98	449.06	455.143	461.345	467.801	474.61	481.797	489.402	497.222	505.078	512.772	520.299	527.654	534.814	541.813	548.606	555.159	561.519	567.726	573.965
265	Estimates	American Samoa		16	18.94	19.296	19.54	19.677	19.729	19.702	19.652	19.598	19.602	19.734	20.013	20.486	21.117	21.882	22.698	23.52	24.321	25.116	25.885	26.614	27.292	27.916	28.492	29.014	29.488	29.932	30.321	30.689	31.102	31.673	32.457	33.493	34.738	36.16	37.688	39.241	40.837	42.45	44.047	45.593	47.038	48.375	49.593	50.72	51.803
266	Estimates	Cook Islands		184	15.077	15.41	15.643	15.844	16.071	16.372	16.738	17.155	17.581	17.967	18.259	18.432	18.51	18.565	18.698	18.968	19.409	19.977	20.586	21.09	21.405	21.51	21.422	21.176	20.81	20.349	19.812	19.196	18.57	18.028	17.638	17.43	17.387	17.466	17.594	17.733	17.851	17.97	18.08	18.211	18.356	18.528	18.714	18.869	18.963
267	Estimates	French Polynesia		258	60.266	62.085	63.87	65.593	67.252	68.854	70.429	72.06	73.827	75.806	78.076	80.703	83.651	86.837	90.132	93.438	96.732	100.029	103.386	106.857	110.495	114.313	118.279	122.356	126.486	130.619	134.748	138.864	143.032	147.296	151.708	156.243	160.888	165.613	170.396	175.204	180.075	184.95	189.738	194.252	198.375	202.016	205.266	208.345	211.579
268	Estimates	Niue		570	4.667	4.678	4.684	4.686	4.685	4.694	4.7	4.719	4.75	4.788	4.826	4.875	4.931	4.983	5.045	5.098	5.151	5.208	5.237	5.218	5.135	4.964	4.724	4.449	4.191	3.976	3.807	3.686	3.599	3.511	3.404	3.269	3.127	2.981	2.841	2.719	2.609	2.521	2.45	2.383	2.329	2.288	2.258	2.236	2.205
269	Estimates	Samoa		882	82.097	84.437	86.819	89.238	91.696	94.208	96.799	99.5	102.353	105.38	108.646	112.119	115.788	119.561	123.354	127.068	130.688	134.193	137.506	140.518	143.176	145.439	147.321	148.889	150.221	151.387	152.39	153.247	154.007	154.76	155.557	156.428	157.403	158.384	159.283	160.031	160.592	161.015	161.421	161.998	162.866	164.076	165.57	167.207	168.788
270	Estimates	Tokelau		772	1.566	1.517	1.504	1.521	1.559	1.607	1.671	1.722	1.782	1.823	1.873	1.902	1.935	1.953	1.947	1.922	1.876	1.818	1.734	1.675	1.621	1.588	1.573	1.573	1.572	1.572	1.567	1.556	1.542	1.543	1.553	1.576	1.62	1.657	1.697	1.709	1.703	1.697	1.665	1.634	1.608	1.578	1.558	1.535	1.529
271	Estimates	Tonga		776	47.22	49.315	51.17	52.783	54.15	55.323	56.366	57.387	58.508	59.873	61.601	63.745	66.259	69.005	71.757	74.362	76.779	79.052	81.097	82.877	84.369	85.518	86.347	86.988	87.609	88.348	89.254	90.295	91.364	92.3	93.007	93.453	93.681	93.774	93.842	93.953	94.145	94.384	94.667	94.929	95.153	95.333	95.496	95.644	95.833
272	Estimates	Tuvalu		798	5.166	5.22	5.293	5.371	5.473	5.569	5.658	5.76	5.864	5.982	6.104	6.246	6.389	6.538	6.684	6.815	6.938	7.04	7.133	7.214	7.303	7.381	7.458	7.537	7.616	7.677	7.749	7.816	7.888	7.962	8.052	8.154	8.284	8.413	8.53	8.65	8.747	8.82	8.883	8.947	9.003	9.053	9.109	9.156	9.19
273	Estimates	Wallis and Futuna Islands		876	7	7.087	7.233	7.424	7.609	7.793	7.962	8.124	8.264	8.406	8.557	8.729	8.903	9.061	9.172	9.223	9.206	9.135	9.023	8.915	8.842	8.791	8.775	8.805	8.912	9.12	9.412	9.794	10.241	10.728	11.234	11.751	12.274	12.774	13.207	13.532	13.74	13.847	13.863	13.866	13.878	13.912	13.955	14.014	14.075
[truncated: 21 more columns]

## Sheet: MEDIUM VARIANT
United Nations
Population Division
Department of Economic and Social Affairs
World Population Prospects: The 2017 Revision
File POP/1-1: Total population (both sexes combined) by region, subregion and country, annually for 1950-2100 (thousands)
Medium fertility variant, 2015 - 2100
POP/DB/WPP/Rev.2017/POP/F01-1
June 2017 - Copyright © 2017 by United Nations. All rights reserved
Suggested citation: United Nations, Department of Economic and Social Affairs, Population Division (2017). World Population Prospects: The 2017 Revision, DVD Edition.
					Total population, both sexes combined, as of 1 July (thousands)
Index	Variant	Region, subregion, country or area *	Notes	Country code	2015	2016	2017	2018	2019	2020	2021	2022	2023	2024	2025	2026	2027	2028	2029	2030	2031	2032	2033	2034	2035	2036	2037	2038	2039	2040	2041	2042	2043	2044	2045	2046	2047	2048	2049	2050	2051	2052	2053	2054	2055	2056	2057	2058	2059
1	Medium variant	WORLD		900	7.38301e+06	7.46696e+06	7.55026e+06	7.63282e+06	7.71458e+06	7.79548e+06	7.87546e+06	7.95447e+06	8.03249e+06	8.10953e+06	8.18561e+06	8.26071e+06	8.3348e+06	8.4079e+06	8.48003e+06	8.5512e+06	8.62142e+06	8.69067e+06	8.75897e+06	8.82632e+06	8.8927e+06	8.95813e+06	9.02259e+06	9.0861e+06	9.14868e+06	9.21034e+06	9.27106e+06	9.33085e+06	9.38966e+06	9.44745e+06	9.50421e+06	9.55991e+06	9.61455e+06	9.66809e+06	9.72053e+06	9.77182e+06	9.82198e+06	9.871e+06	9.91887e+06	9.96559e+06	1.00112e+07	1.00556e+07	1.00989e+07	1.01412e+07	1.01824e+07
2	Medium variant	More developed regions	a	901	1.25321e+06	1.25658e+06	1.25992e+06	1.2632e+06	1.26634e+06	1.26928e+06	1.27201e+06	1.27456e+06	1.27694e+06	1279181	1.2813e+06	1.28329e+06	1.28517e+06	1.28691e+06	1.2885e+06	1.28994e+06	1.29122e+06	1.29235e+06	1.29335e+06	1.29423e+06	1.295e+06	1.29567e+06	1.29625e+06	1.29674e+06	1.29715e+06	1.2975e+06	1.29777e+06	1.29799e+06	1.29816e+06	1.29828e+06	1.29835e+06	1.29838e+06	1.29838e+06	1.29833e+06	1.29823e+06	1.29807e+06	1.29785e+06	1.29759e+06	1.29727e+06	1296902	1.29649e+06	1.29604e+06	1.29554e+06	1.29502e+06	1.29446e+06
3	Medium variant	Less developed regions	b	902	6.1298e+06	6.21039e+06	6.29034e+06	6.36962e+06	6.44824e+06	6.52621e+06	6.60345e+06	6.67991e+06	6.75554e+06	6.83035e+06	6.90432e+06	6.97742e+06	7.04963e+06	7.12099e+06	7.19153e+06	7.26126e+06	7.3302e+06	7.39832e+06	7.46562e+06	7.53209e+06	7.5977e+06	7.66245e+06	7.72634e+06	7.78936e+06	7.85153e+06	7.91284e+06	7.97329e+06	8.03285e+06	8.0915e+06	8.14918e+06	8.20586e+06	8.26153e+06	8.31617e+06	8.36977e+06	8.4223e+06	8.47375e+06	8.52413e+06	8.57341e+06	8.6216e+06	8.66869e+06	8.71468e+06	8.75957e+06	8.80338e+06	8.84614e+06	8.88791e+06
4	Medium variant	Least developed countries	c	941	956631	979388	1.00249e+06	1.02594e+06	1.04976e+06	1.07398e+06	1.09859e+06	1.12356e+06	1.14888e+06	1.17451e+06	1.20044e+06	1.22665e+06	1.25313e+06	1.27989e+06	1.30691e+06	1.3342e+06	1.36174e+06	1.38952e+06	1.41753e+06	1.44575e+06	1.47418e+06	1.50281e+06	1.53161e+06	1.56058e+06	1.58971e+06	1.61898e+06	1.64839e+06	1.67792e+06	1.70755e+06	1.73727e+06	1.76706e+06	1.79691e+06	1.82681e+06	1.85675e+06	1.88673e+06	1.91674e+06	1.94677e+06	1.9768e+06	2.00683e+06	2.03683e+06	2.0668e+06	2.09672e+06	2.12658e+06	2.15637e+06	2.18609e+06
5	Medium variant	Less developed regions, excluding least developed countries	d	934	5.17317e+06	5.231e+06	5.28785e+06	5.34368e+06	5.39848e+06	5.45222e+06	5.50486e+06	5.55634e+06	5.60667e+06	5.65584e+06	5.70388e+06	5.75077e+06	5.7965e+06	5.84111e+06	5.88462e+06	5.92707e+06	5.96846e+06	6.00881e+06	6.0481e+06	6.08634e+06	6.12352e+06	6.15965e+06	6.19473e+06	6.22878e+06	6.26182e+06	6.29386e+06	6.3249e+06	6.35493e+06	6.38395e+06	6.41191e+06	6.4388e+06	6.46462e+06	6.48936e+06	6.51301e+06	6.53557e+06	6.55701e+06	6.57736e+06	6.59661e+06	6.61477e+06	6.63186e+06	6.64788e+06	6.66285e+06	6.6768e+06	6.68977e+06	6.70182e+06
6	Medium variant	Less developed regions, excluding China		948	4.70144e+06	4.77542e+06	4.84921e+06	4.92282e+06	4.99629e+06	5.06964e+06	5.14284e+06	5.21582e+06	5.28853e+06	5.36093e+06	5.43297e+06	5.50461e+06	5.57585e+06	5.64668e+06	5.71713e+06	5.7872e+06	5.85688e+06	5.92614e+06	5.99496e+06	6.06332e+06	6.13118e+06	6.19853e+06	6.26535e+06	6.33163e+06	6.39736e+06	6.46252e+06	6.52711e+06	6.59109e+06	6.65444e+06	6.7171e+06	6.77906e+06	6.84028e+06	6.90074e+06	6.96043e+06	7.01932e+06	7.0774e+06	7.13464e+06	7.19104e+06	7.24657e+06	7.30119e+06	7.35488e+06	7.40764e+06	7.45946e+06	7.51034e+06	7.56029e+06
7	Medium variant	High-income countries	e	1503	1.18006e+06	1.18586e+06	1.19158e+06	1.19719e+06	1.20261e+06	1.20778e+06	1.21269e+06	1.21738e+06	1.22189e+06	1.22624e+06	1.23049e+06	1.23464e+06	1.23868e+06	1.24259e+06	1.24634e+06	1.2499e+06	1.25326e+06	1.25645e+06	1.25945e+06	1.26227e+06	1.26492e+06	1.2674e+06	1.2697e+06	1.27184e+06	1.27383e+06	1.27568e+06	1.27739e+06	1.27896e+06	1.28041e+06	1.28175e+06	1.28299e+06	1.28414e+06	1.28519e+06	1.28615e+06	1.28702e+06	1.2878e+06	1.28848e+06	1.28908e+06	1.28959e+06	1.29004e+06	1.29041e+06	1.29072e+06	1.29097e+06	1.29117e+06	1.29133e+06
8	Medium variant	Middle-income countries	e	1517	5.55826e+06	5.61898e+06	5.67878e+06	5.73764e+06	5.79557e+06	5.85258e+06	5.90859e+06	5.96355e+06	6.0174e+06	6.07011e+06	6.12166e+06	6.17203e+06	6.22121e+06	6.26923e+06	6.31617e+06	6.36205e+06	6.40691e+06	6.45072e+06	6.4935e+06	6.53526e+06	6.57601e+06	6.61575e+06	6.65449e+06	6.69224e+06	6.72902e+06	6.76484e+06	6.7997e+06	6.8336e+06	6.8665e+06	6.89837e+06	6.92918e+06	6.95893e+06	6.98761e+06	7.0152e+06	7.0417e+06	7.06708e+06	7.09135e+06	7.11452e+06	7.13658e+06	7.15755e+06	7.17743e+06	7.19623e+06	7.21397e+06	7.23071e+06	7.2465e+06
9	Medium variant	Upper-middle-income countries	e	1502	2.58836e+06	2.60655e+06	2.62386e+06	2.64023e+06	2.65566e+06	2.67012e+06	2.68356e+06	2.69596e+06	2.70741e+06	2.71803e+06	2.72793e+06	2.73714e+06	2.74565e+06	2.75349e+06	2.76068e+06	2.76725e+06	2.77321e+06	2.77859e+06	2.78342e+06	2.7877e+06	2.79145e+06	2.79468e+06	2.7974e+06	2.79964e+06	2.80142e+06	2.80274e+06	2.80362e+06	2.80405e+06	2.80403e+06	2.80354e+06	2.80257e+06	2.80112e+06	2.7992e+06	2.79679e+06	2.79389e+06	2.7905e+06	2.78661e+06	2.78224e+06	2.77742e+06	2.77214e+06	2.76644e+06	2.76032e+06	2.75382e+06	2.74697e+06	2.7398e+06
10	Medium variant	Lower-middle-income countries	e	1501	2.9699e+06	3.01243e+06	3.05492e+06	3.09741e+06	3.13991e+06	3.18245e+06	3.22503e+06	3.26758e+06	3.30999e+06	3.35208e+06	3.39373e+06	3.43489e+06	3.47556e+06	3.51574e+06	3.55548e+06	3.59481e+06	3.6337e+06	3.67212e+06	3.71008e+06	3.74756e+06	3.78456e+06	3.82107e+06	3.85709e+06	3.8926e+06	3.9276e+06	3.9621e+06	3.99609e+06	4.02955e+06	4.06247e+06	4.09482e+06	4.12661e+06	4.1578e+06	4.18841e+06	4.21841e+06	4.2478e+06	4.27658e+06	4.30474e+06	4.33227e+06	4.35917e+06	4.38541e+06	4.41099e+06	4.4359e+06	4.46015e+06	4.48375e+06	4.5067e+06
11	Medium variant	Low-income countries	e	1500	641859	659273	677007	695060	713435	732133	751148	770472	790105	810044	830289	850834	871672	892801	914213	935905	957870	980098	1.00258e+06	1.02531e+06	1.04826e+06	1.07144e+06	1.09483e+06	1.11842e+06	1.1422e+06	1.16616e+06	1.19029e+06	1.21457e+06	1.23901e+06	1.26357e+06	1.28824e+06	1.31303e+06	1.33791e+06	1.36287e+06	1.38792e+06	1.41303e+06	1.43822e+06	1.46345e+06	1.48872e+06	1.51401e+06	1.53932e+06	1.56463e+06	1.58993e+06	1.6152e+06	1.64045e+06
12	Medium variant	Sub-Saharan Africa	f	947	969234	995695	1.02266e+06	1.05014e+06	1.07811e+06	1.10657e+06	1.13553e+06	1.16496e+06	1.19489e+06	1.22531e+06	1.25624e+06	1.28767e+06	1.31959e+06	1.35201e+06	1.38493e+06	1.41833e+06	1.45223e+06	1.48659e+06	1.52142e+06	1.5567e+06	1.5924e+06	1.62851e+06	1.66503e+06	1.70193e+06	1.73919e+06	1.77679e+06	1.81472e+06	1.85296e+06	1.89149e+06	1.93029e+06	1.96933e+06	2.0086e+06	2.04808e+06	2.08776e+06	2.12762e+06	2.16765e+06	2.20784e+06	2.24817e+06	2.28861e+06	2.32915e+06	2.36976e+06	2.41043e+06	2.45114e+06	2.49188e+06	2.53263e+06
13	Medium variant	AFRICA		903	1.19437e+06	1.22508e+06	1.25627e+06	1.28792e+06	1.32004e+06	1.35262e+06	1.38565e+06	1.41912e+06	1.45303e+06	1.48741e+06	1.52225e+06	1.55756e+06	1.59334e+06	1.62959e+06	1.66632e+06	1.70354e+06	1.74124e+06	1.77943e+06	1.81807e+06	1.85717e+06	1.8967e+06	1.93666e+06	1.97703e+06	2.01777e+06	2.05888e+06	2.1003e+06	2.14203e+06	2.18405e+06	2.22633e+06	2.26884e+06	2.31156e+06	2.35446e+06	2.39753e+06	2.44075e+06	2.48409e+06	2.52756e+06	2.57112e+06	2.61476e+06	2.65845e+06	2.70218e+06	2.74593e+06	2.78967e+06	2.83339e+06	2.87708e+06	2.92074e+06
14	Medium variant	Eastern Africa		910	399458	410638	422036	433643	445447	457440	469614	481968	494503	507224	520131	533223	546492	559936	573550	587330	601271	615368	629614	644001	658521	673167	687934	702816	717809	732906	748102	763390	778762	794211	809729	825309	840944	856630	872360	888129	903929	919755	935598	951449	967302	983148	998981	1.01479e+06	1.03058e+06
15	Medium variant	Burundi		108	10199.3	10524.1	10864.2	11216.5	11576	11939.2	12305.5	12675.5	13049.3	13427.3	13810	14197.1	14588.7	14985.5	15388.6	15798.8	16216.5	16641.7	17075.2	17517.9	17970.2	18432.4	18904.4	19386.1	19877.1	20377.1	20885.9	21403.3	21928.5	22460.5	22998.5	23542.1	24091	24644.3	25201.5	25762	26325.4	26891.5	27459.9	28030.6	28603.4	29178.2	29754.7	30333.4	30914.4
16	Medium variant	Comoros		174	777.424	795.601	813.912	832.347	850.91	869.601	888.407	907.306	926.312	945.406	964.591	983.86	1003.21	1022.64	1042.16	1061.78	1081.47	1101.26	1121.12	1141.05	1161.07	1181.14	1201.28	1221.48	1241.7	1261.94	1282.21	1302.47	1322.72	1342.93	1363.1	1383.2	1403.23	1423.17	1443.01	1462.73	1482.33	1501.79	1521.1	1540.27	1559.29	1578.14	1596.83	1615.35	1633.67
17	Medium variant	Djibouti		262	927.414	942.333	956.985	971.408	985.69	999.899	1014.02	1028.03	1041.88	1055.55	1069.01	1082.25	1095.26	1108.02	1120.51	1132.71	1144.61	1156.2	1167.46	1178.4	1189	1199.26	1209.17	1218.74	1227.97	1236.85	1245.4	1253.61	1261.49	1269.04	1276.27	1283.18	1289.77	1296.04	1301.98	1307.62	1312.92	1317.9	1322.56	1326.9	1330.91	1334.59	1337.93	1340.95	1343.63
18	Medium variant	Eritrea		232	4846.98	4954.65	5068.83	5187.95	5309.66	5432.22	5555.14	5678.8	5803.38	5929.3	6056.88	6186.02	6316.48	6448.45	6582.13	6717.69	6855.11	6994.25	7135.03	7277.27	7420.81	7565.54	7711.34	7857.97	8005.12	8152.54	8300.07	8447.6	8594.9	8741.76	8887.99	9033.46	9178.09	9321.83	9464.69	9606.66	9747.67	9887.68	10026.7	10164.8	10301.9	10438	10573.2	10707.4	10840.5
19	Medium variant	Ethiopia		231	99873	102403	104957	107535	110136	112759	115403	118065	120741	123428	126121	128818	131518	134219	136920	139620	142318	145010	147696	150372	153036	155686	158322	160943	163548	166139	168714	171272	173809	176325	178818	181285	183726	186138	188520	190870	193186	195466	197710	199916	202083	204208	206292	208332	210328
20	Medium variant	Kenya		404	47236.3	48461.6	49699.9	50950.9	52214.8	53491.7	54780.9	56081.8	57395.1	58722.1	60063.2	61418.2	62786.3	64166.6	65558.2	66960	68371.2	69791	71217.9	72650.1	74086.1	75524.9	76965.6	78407	79847.7	81286.9	82723.3	84156.3	85585.8	87011.8	88434.2	89852.2	91265.2	92672.5	94073.4	95467.1	96853.1	98230.6	99598.6	100956	102303	103637	104958	106266	107560
21	Medium variant	Madagascar		450	24234.1	24894.6	25570.9	26262.8	26969.6	27690.8	28426.1	29175.4	29938.1	30713.2	31500.1	32298.3	33107.4	33926.7	34755.1	35591.9	36436.8	37289.3	38149.4	39016.8	39891.4	40773	41661.3	42556.4	43458.5	44367.7	45283.7	46206.4	47135.7	48071.2	49013	49960.6	50913.8	51872.1	52835.2	53802.6	54773.9	55748.6	56726.2	57705.7	58686.5	59668.2	60650.2	61632.2	62613.8
22	Medium variant	Malawi		454	17573.6	18091.6	18622.1	19164.7	19718.7	20283.7	20859.2	21445.5	22043.3	22653.6	23277.2	23914.2	24564	25225.5	25897.3	26578.2	27267.7	27965.7	28672.1	29386.8	30109.9	30840.8	31579.2	32324.9	33077.5	33836.7	34602.3	35373.9	36150.9	36932.8	37719.2	38509.5	39303.4	40100.8	40901.4	41705	42511.3	43319.7	44129.8	44940.8	45752.2	46563.6	47374.5	48184.4	48992.8
23	Medium variant	Mauritius	1	480	1259.46	1262.13	1265.14	1268.32	1271.37	1274.11	1276.47	1278.53	1280.31	1281.88	1283.27	1284.5	1285.51	1286.28	1286.76	1286.93	1286.78	1286.3	1285.47	1284.27	1282.7	1280.74	1278.4	1275.68	1272.61	1269.2	1265.45	1261.39	1257.04	1252.43	1247.6	1242.57	1237.35	1231.99	1226.54	1221.03	1215.49	1209.92	1204.35	1198.77	1193.21	1187.67	1182.15	1176.65	1171.16
24	Medium variant	Mayotte		175	240.02	246.489	253.045	259.682	266.38	273.11	279.874	286.689	293.554	300.493	307.518	314.623	321.799	329.066	336.396	343.809	351.278	358.821	366.418	374.06	381.739	389.43	397.148	404.876	412.607	420.33	428.032	435.713	443.368	450.985	458.543	466.059	473.509	480.897	488.235	495.498	502.702	509.836	516.908	523.91	530.854	537.729	544.533	551.272	557.926
25	Medium variant	Mozambique		508	28010.7	28829.5	29668.8	30528.7	31408.8	32309.2	33229.7	34170.3	35131.4	36113.3	37116.2	38140	39184.3	40249.1	41334	42438.7	43563	44706.3	45867.9	47046.7	48241.8	49452.5	50678.6	51919.4	53174.4	54443.1	55725.1	57019.9	58326.8	59645.2	60974.6	62314.4	63664.4	65024.4	66394.6	67774.9	69165.1	70564.3	71972.2	73388	74811	76240.8	77676.8	79118	80563.4
26	Medium variant	Réunion		638	863.363	869.925	876.562	883.247	889.918	896.536	903.082	909.57	915.978	922.279	928.446	934.472	940.343	946.051	951.595	956.97	962.184	967.197	972	976.589	980.93	985.014	988.849	992.402	995.683	998.682	1001.4	1003.82	1005.97	1007.82	1009.42	1010.73	1011.79	1012.6	1013.18	1013.56	1013.74	1013.74	1013.56	1013.24	1012.79	1012.23	1011.57	1010.82	1009.97
27	Medium variant	Rwanda		646	11629.6	11917.5	12208.4	12501.2	12794.4	13087.2	13379	13669.9	13960.5	14251.7	14544	14837.4	15131.9	15427.6	15725	16024.3	16325.3	16628	16932.1	17237.1	17542.7	17848.7	18154.7	18460	18763.9	19065.7	19365	19661.5	19954.7	20244.2	20529.4	20810	21086	21357.3	21624	21886.1	22143.5	22396.2	22644.2	22887.7	23126.9	23361.6	23591.9	23817.5	24038.3
28	Medium variant	Seychelles		690	93.742	94.228	94.737	95.235	95.702	96.112	96.464	96.76	97.011	97.217	97.414	97.58	97.717	97.833	97.93	98.01	98.082	98.136	98.185	98.219	98.241	98.254	98.258	98.252	98.223	98.185	98.131	98.061	97.972	97.855	97.721	97.553	97.359	97.145	96.909	96.643	96.356	96.049	95.718	95.378	95.017	94.642	94.263	93.872	93.47
29	Medium variant	Somalia		706	13908.1	14318	14742.5	15181.9	15636.2	16105.2	16589.2	17088.2	17601.4	18127.6	18665.8	19215.9	19777.8	20351.5	20937.2	21535	22144.8	22766.2	23399.3	24043.8	24699.6	25366.5	26044.6	26733.8	27434.2	28145.9	28868.8	29602.6	30347.4	31103	31869.3	32646.1	33433.2	34230.1	35036.5	35851.8	36675.7	37507.9	38347.9	39195.3	40049.5	40910.4	41777.3	42649.8	43527.4
30	Medium variant	South Sudan		728	11882.1	12230.7	12575.7	12919.1	13263.2	13610	13960.4	14314.5	14672	15032.4	15395.5	15761.3	16130.3	16502.2	16877	17254.4	17634.3	18016.9	18402.4	18791	19182.9	19578.2	19976.6	20378.1	20782.4	21189.2	21598.4	22010	22423.7	22839.4	23257	23676.3	24097.1	24519.2	24942.3	25366.2	25790.7	26215.6	26640.4	27065	27488.8	27911.8	28333.6	28754.1	29173
31	Medium variant	Uganda		800	40144.9	41488	42863	44270.6	45711.9	47187.7	48698.1	50242.8	51822.1	53436.3	55085.5	56769.4	58487.7	60239.9	62025	63842.4	65691.4	67571.5	69481.5	71420.3	73386.5	75379.4	77398.3	79442.6	81511.7	83605	85721.5	87860.6	90021.6	92203.9	94406.7	96629.1	98870.3	101129	103406	105698	108006	110328	112662	115008	117362	119725	122095	124470	126850
32	Medium variant	United Republic of Tanzania	2	834	53880	55572.2	57310	59091.4	60913.6	62774.6	64673.9	66612.1	68591.2	70613.5	72681.1	74794.1	76952.2	79156	81405.9	83702.1	86044.6	88432.9	90866.1	93342.8	95861.5	98421.7	101023	103663	106343	109060	111813	114603	117427	120284	123174	126094	129045	132027	135039	138082	141154	144256	147386	150545	153731	156945	160184	163448	166735
33	Medium variant	Zambia		894	16100.6	16591.4	17094.1	17609.2	18137.4	18679.3	19234.8	19803.6	20386.1	20982.8	21593.8	22219.4	22859.4	23513.1	24180	24859.4	25551.2	26255.4	26971.9	27700.6	28441.4	29194.3	29959.1	30736	31525.1	32326.6	33140.4	33966.4	34804.6	35654.7	36516.7	37390.3	38275.5	39172.3	40080.7	41000.8	41932.4	42875.2	43828.6	44791.6	45763.7	46744.4	47733.6	48731.2	49737.1
34	Medium variant	Zimbabwe		716	15777.5	16150.4	16529.9	16913.3	17297.5	17680.5	18060.5	18437.4	18813.1	19190.3	19571.2	19955.9	20343.9	20735.1	21129.4	21526.9	21927.3	22330.8	22736.9	23145.5	23556	23968.3	24382.1	24796.7	25211.5	25626	26039.7	26452.2	26863.1	27271.9	27678.3	28081.9	28482.2	28878.8	29271.1	29658.8	30041.3	30418.5	30790.3	31156.4	31516.7	31871.1	32219.3	32561.3	32897
35	Medium variant	Middle Africa		911	153743	158563	163495	168538	173693	178959	184337	189824	195424	201136	206961	212898	218948	225109	231384	237771	244269	250875	257588	264402	271315	278323	285423	292610	299877	307221	314636	322119	329667	337276	344941	352659	360426	368241	376101	384005	391948	399929	407943	415985	424052	432139	440244	448366	456503
36	Medium variant	Angola		24	27859.3	28813.5	29784.2	30774.2	31787.6	32827.4	33894.5	34988.3	36109.1	37256.7	38431.2	39632.8	40861.7	42118.1	43401.6	44712.3	46049.9	47414.3	48805.2	50222.2	51664.9	53133	54626	56143.5	57684.7	59249	60836	62445.1	64075.7	65727.3	67399.1	69090.8	70801.7	72531.4	74279.7	76046.1	77830	79631.1	81448.8	83282.6	85132.1	86996.7	88875.8	90769.1	92676
37	Medium variant	Cameroon		120	22834.5	23439.2	24053.7	24678.2	25313	25958.2	26613.8	27279.6	27955.8	28642.2	29339.1	30046.2	30763.7	31491.6	32230.2	32979.6	33739.9	34510.8	35291.9	36083	36883.6	37693.5	38512.5	39340.2	40176.4	41020.8	41873.1	42732.8	43599.4	44472.4	45351	46235	47123.9	48017.5	48915.4	49817.4	50723.1	51632.2	52543.9	53457.9	54373.5	55290.4	56208.2	57126.8	58045.7
38	Medium variant	Central African Republic		140	4546.1	4594.62	4659.08	4737.42	4825.71	4920.89	5022.85	5132.27	5247.59	5366.95	5488.9	5612.53	5737.66	5864.32	5992.91	6123.61	6256.23	6390.25	6525.38	6661.22	6797.52	6934.06	7070.78	7207.59	7344.49	7481.45	7618.4	7755.27	7892.1	8028.92	8165.79	8302.67	8439.55	8576.47	8713.53	8850.78	8988.18	9125.7	9263.24	9400.71	9538.01	9675.08	9811.81	9948.08	10083.7
39	Medium variant	Chad		148	14009.4	14452.5	14900	15353.2	15814.3	16285.1	16765.7	17255.5	17754.2	18261.1	18775.6	19297.6	19827.2	20364.2	20908.5	21460	22018.4	22583.5	23155.2	23733.2	24317.3	24907.3	25503	26104	26710.2	27321.2	27936.8	28556.7	29180.6	29808.2	30439.3	31073.4	31710.3	32349.8	32991.8	33635.8	34281.7	34929.1	35577.9	36227.7	36878.2	37529.3	38180.5	38831.6	39482.2
40	Medium variant	Congo		178	4995.65	5125.82	5260.75	5399.9	5542.2	5686.92	5834.09	5984.19	6137.53	6294.49	6455.37	6620.22	6788.98	6961.68	7138.33	7318.89	7503.34	7691.58	7883.41	8078.59	8276.84	8478.1	8682.2	8888.86	9097.76	9308.63	9521.3	9735.72	9951.83	10169.6	10388.9	10609.8	10832.3	11056.3	11282.1	11509.7	11739.1	11970.4	12203.4	12438.4	12675.2	12913.7	13154.1	13396.2	13640.1
41	Medium variant	Democratic Republic of the Congo		180	76196.6	78736.2	81340	84005	86727.6	89505.2	92336	95220.4	98160.4	101160	104221	107343	110526	113770	117076	120443	123871	127358	130902	134502	138153	141856	145607	149403	153240	157114	161023	164964	168936	172935	176961	181010	185080	189170	193278	197404	201546	205701	209867	214041	218220	222403	226588	230773	234960
42	Medium variant	Equatorial Guinea		226	1175.39	1221.49	1267.69	1313.89	1360.1	1406.28	1452.35	1498.29	1544.2	1590.28	1636.62	1683.3	1730.26	1777.36	1824.39	1871.22	1917.79	1964.18	2010.61	2057.39	2104.73	2152.69	2201.21	2250.16	2299.38	2348.71	2398.15	2447.7	2497.32	2546.98	2596.65	2646.29	2695.89	2745.46	2795.08	2844.74	2894.47	2944.2	2993.89	3043.45	3092.85	3142.03	3190.99	3239.66	3287.99
43	Medium variant	Gabon		266	1930.17	1979.79	2025.14	2067.56	2109.1	2151.29	2194.49	2238.28	2282.53	2326.9	2371.14	2415.32	2459.62	2504.07	2548.69	2593.51	2638.54	2683.76	2729.21	2774.89	2820.81	2866.95	2913.3	2959.83	3006.5	3053.26	3100.09	3146.96	3193.8	3240.54	3287.14	3333.54	3379.7	3425.56	3471.06	3516.14	3560.76	3604.89	3648.48	3691.51	3733.94	3775.76	3816.94	3857.49	3897.43
44	Medium variant	Sao Tome and Principe		678	195.553	199.91	204.327	208.818	213.379	218.011	222.718	227.489	232.342	237.266	242.282	247.375	252.551	257.802	263.107	268.471	273.872	279.317	284.804	290.321	295.864	301.424	307	312.597	318.201	323.814	329.429	335.053	340.68	346.294	351.902	357.495	363.08	368.648	374.203	379.749	385.297	390.834	396.355	401.853	407.332	412.784	418.21	423.615	429
45	Medium variant	Northern Africa		912	225136	229386	233604	237785	241933	246049	250127	254159	258146	262094	266010	269893	273745	277573	281390	285204	289018	292831	296648	300472	304305	308148	311997	315847	319688	323511	327312	331090	334839	338554	342230	345864	349451	352990	356475	359905	363277	366590	369843	373036	376169	379241	382252	385206	388105
46	Medium variant	Algeria		12	39871.5	40606.1	41318.1	42008.1	42679	43333.3	43969.3	44584.5	45178.8	45753	46307.6	46843.1	47360	47860.5	48347.1	48822	49286.3	49741.1	50188.5	50630.9	51070.4	51507.8	51943.7	52378.8	52813.8	53249	53684.4	54119.6	54553.5	54984.7	55411.8	55833.9	56250.1	56657.9	57054.2	57436.7	57804.2	58156.1	58491.2	58808.3	59106.5	59385.3	59644.9	59885.8	60109.3
47	Medium variant	Egypt		818	93778.2	95688.7	97553.2	99375.7	101169	102941	104692	106416	108117	109800	111471	113130	114781	116429	118082	119746	121422	123110	124813	126531	128264	130014	131776	133545	135311	137066	138806	140530	142235	143918	145576	147206	148807	150379	151921	153433	154915	156366	157787	159180	160546	161886	163199	164489	165757
48	Medium variant	Libya		434	6234.95	6293.25	6374.62	6470.96	6569.86	6662.17	6745.67	6822.85	6894.77	6963.84	7031.83	7098.48	7162.73	7224.69	7284.51	7342.35	7398.21	7452.16	7504.31	7554.8	7603.74	7651.16	7697.03	7741.37	7784.12	7825.25	7864.74	7902.53	7938.42	7972.2	8003.68	8032.77	8059.44	8083.58	8105.01	8123.67	8139.51	8152.56	8162.83	8170.35	8175.2	8177.44	8177.15	8174.52	8169.76
49	Medium variant	Morocco		504	34803.3	35276.8	35739.6	36191.8	36635.2	37070.7	37497.5	37913.9	38319.7	38715.3	39100.6	39475.7	39840.1	40194.4	40538.8	40873.6	41199	41514.9	41821.5	42118.9	42407.2	42686.4	42956.6	43217.8	43470.2	43713.7	43948.4	44174.2	44391.3	44599.3	44798.4	44988.5	45169.6	45341.7	45505.1	45659.9	45806	45943.4	46071.9	46191.2	46301.1	46401.6	46492.7	46574.4	46646.8
50	Medium variant	Sudan		729	38647.8	39578.8	40533.3	41511.5	42514.1	43541.2	44592.4	45666.3	46760.5	47872.4	48999.7	50141.1	51296	52464.5	53646.6	54842.5	56051.3	57272.1	58503.9	59745.5	60996.1	62255	63521.4	64794.6	66073.6	67357.5	68645.7	69937.8	71233.5	72532.6	73834.9	75140	76447.6	77757.7	79070.4	80385.6	81703.2	83022.8	84344.1	85667	86991.2	88316.3	89641.7	90967.2	92292.3
51	Medium variant	Tunisia		788	11273.7	11403.2	11532.1	11659.2	11783.2	11903.1	12018.5	12129.1	12234.7	12335.5	12431.6	12522.7	12609	12690.7	12768.1	12841.6	12911.5	12977.8	13041.1	13102	13161	13218.4	13274.2	13328.7	13382.1	13434.5	13486.1	13536.8	13586.3	13634.5	13681.1	13726	13769	13810	13848.4	13884	13916.6	13946.2	13972.6	13995.7	14015.4	14031.5	14044.2	14053.7	14060
52	Medium variant	Western Sahara		732	526.216	538.755	552.628	567.421	582.478	597.339	611.845	626.089	640.128	654.081	668.025	681.963	695.8	709.532	723.171	736.683	750.079	763.355	776.509	789.535	802.434	815.211	827.85	840.378	852.78	865.076	877.258	889.323	901.273	913.113	924.851	936.482	947.993	959.363	970.543	981.529	992.301	1002.85	1013.19	1023.29	1033.16	1042.79	1052.2	1061.36	1070.29
53	Medium variant	Southern Africa		913	63419.6	64292.4	65143.2	65973.8	66789.8	67595	68388.1	69165.5	69926.4	70670	71396.2	72104.5	72795.4	73470.9	74133.8	74786	75428.5	76061.1	76684.3	77298.1	77902.9	78498.8	79086.1	79664.5	80233.9	80793.9	81344.5	81885.5	82416.3	82936	83444	83939.9	84423.6	84895	85353.8	85800	86233.4	86653.8	87061	87454.7	87834.9	88201.3	88554	88893.3	89219.3
54	Medium variant	Botswana		72	2209.2	2250.26	2291.66	2333.2	2374.64	2415.77	2456.46	2496.66	2536.35	2575.56	2614.32	2652.58	2690.3	2727.49	2764.2	2800.43	2836.2	2871.49	2906.32	2940.69	2974.63	3008.14	3041.2	3073.8	3105.93	3137.6	3168.77	3199.42	3229.52	3259.01	3287.87	3316.05	3343.54	3370.29	3396.26	3421.4	3445.68	3469.1	3491.63	3513.25	3533.97	3553.75	3572.62	3590.56	3607.58
55	Medium variant	Lesotho		426	2174.64	2203.82	2233.34	2263.01	2292.68	2322.22	2351.5	2380.5	2409.25	2437.84	2466.33	2494.72	2523	2551.25	2579.54	2607.96	2636.53	2665.24	2694.14	2723.24	2752.56	2782.1	2811.86	2841.8	2871.93	2902.2	2932.59	2963.09	2993.62	3024.12	3054.5	3084.73	3114.78	3144.62	3174.19	3203.47	3232.41	3260.98	3289.12	3316.75	3343.82	3370.3	3396.16	3421.38	3445.93
56	Medium variant	Namibia		516	2425.56	2479.71	2533.79	2587.8	2642	2696.54	2751.25	2805.93	2860.59	2915.33	2970.21	3025.23	3080.31	3135.43	3190.56	3245.66	3300.71	3355.71	3410.7	3465.69	3520.74	3575.82	3630.91	3686.03	3741.17	3796.32	3851.46	3906.58	3961.6	4016.47	4071.14	4125.55	4179.67	4233.43	4286.73	4339.5	4391.69	4443.26	4494.14	4544.3	4593.67	4642.2	4689.88	4736.69	4782.61
57	Medium variant	South Africa		710	55291.2	56015.5	56717.2	57398.4	58065.1	58721.2	59366	59996	60610.6	61208.8	61790	62354	62901.5	63434.3	63954.9	64465.6	64966.8	65458.7	65941.5	66415.3	66880.3	67336.6	67784.5	68223.9	68654.6	69076.4	69489.3	69893.2	70287.6	70672	71045.9	71409.1	71761.5	72103.2	72434.2	72754.6	73064.3	73363.3	73651.4	73928.7	74195.1	74450.6	74695.2	74929.3	75153.1
58	Medium variant	Swaziland		748	1319.01	1343.1	1367.25	1391.38	1415.41	1439.3	1462.95	1486.38	1509.57	1532.54	1555.33	1577.9	1600.28	1622.47	1644.51	1666.43	1688.25	1709.97	1731.6	1753.16	1774.68	1796.16	1817.6	1838.96	1860.22	1881.37	1902.38	1923.26	1943.94	1964.4	1984.61	2004.53	2024.14	2043.45	2062.42	2081.04	2099.3	2117.16	2134.63	2151.67	2168.28	2184.43	2200.12	2215.35	2230.11
59	Medium variant	Western Africa		914	352614	362202	371990	381981	392176	402579	413189	424006	435035	446282	457752	469444	481358	493496	505859	518446	531257	544289	557537	570996	584660	598526	612587	626837	641267	655870	670639	685567	700646	715866	731217	746693	762286	777992	793804	809719	825729	841828	858007	874257	890569	906938	923357	939822	956332
60	Medium variant	Benin		204	10576	10872.3	11175.7	11485.7	11801.6	12123	12449.6	12781.5	13118.7	13461.4	13809.5	14163	14521.7	14885.6	15254.5	15628.4	16007.1	16390.6	16778.6	17171.2	17568.2	17969.6	18375	18784.4	19197.5	19613.9	20033.6	20456.4	20882.1	21310.6	21741.6	22175	22610.6	23048.3	23488.1	23929.8	24373.4	24818.5	25265.1	25712.8	26161.4	26610.7	27060.6	27510.9	27961.8
61	Medium variant	Burkina Faso		854	18110.6	18646.4	19193.4	19751.7	20321.6	20903.3	21497	22102.3	22719.7	23349.3	23991.2	24645.5	25312	25990.5	26680.8	27382.5	28095.4	28819.4	29553.8	30298.4	31052.7	31816.3	32588.7	33369.5	34158.1	34953.8	35756.3	36565.2	37379.9	38199.8	39024.3	39853	40685.7	41522.1	42362.6	43207.1	44055.2	44906.7	45760.9	46617.3	47475.2	48334.3	49194.4	50055.1	50916.4
62	Medium variant	Cabo Verde		132	532.913	539.56	546.388	553.335	560.349	567.348	574.312	581.247	588.146	595.016	601.854	608.651	615.385	622.042	628.608	635.072	641.408	647.63	653.712	659.663	665.467	671.121	676.628	681.976	687.17	692.212	697.101	701.821	706.387	710.805	715.082	719.211	723.188	727.022	730.694	734.199	737.529	740.697	743.704	746.529	749.193	751.689	754.013	756.16	758.131
63	Medium variant	Côte d'Ivoire		384	23108.5	23695.9	24294.8	24905.8	25531.1	26171.8	26827.7	27498.1	28182.3	28880	29590.6	30314	31050.2	31799.3	32561.7	33337.3	34126.2	34928.2	35743.2	36570.9	37411.2	38264	39129.1	40006.3	40895.4	41796	42708.1	43631.2	44565.1	45509.5	46464	47428.3	48402.1	49384.9	50376.1	51375.2	52381.7	53395.3	54416.1	55444.2	56479.6	57521.9	58570.7	59625.5	60685.7
64	Medium variant	Gambia		270	1977.59	2038.5	2100.57	2163.76	2228.07	2293.49	2359.95	2427.42	2495.9	2565.35	2635.74	2707.04	2779.22	2852.25	2926.07	3000.67	3076	3152	3228.62	3305.8	3383.47	3461.61	3540.11	3618.92	3697.95	3777.1	3856.32	3935.56	4014.73	4093.76	4172.6	4251.18	4329.46	4407.4	4484.97	4562.15	4638.9	4715.15	4790.92	4866.14	4940.79	5014.84	5088.25	5161	5233.04
65	Medium variant	Ghana		288	27582.8	28206.7	28833.6	29463.6	30097	30733.8	31374.1	32017.8	32665.1	33315.7	33969.8	34627.2	35288	35952.5	36621.1	37294	37971.3	38652.8	39338.1	40027.1	40719.3	41414.5	42112.4	42813	43516.2	44221.8	44929.5	45638.8	46348.7	47058.3	47766.7	48473.3	49177.8	49879.3	50576.9	51269.9	51958	52640.7	53318	53989.6	54655.6	55315.7	55969.7	56617.8	57260.2
66	Medium variant	Guinea		324	12091.5	12395.9	12717.2	13052.6	13398.2	13750.8	14109.7	14475.1	14847.1	15225.9	15611.6	16003.8	16401.9	16805.9	17215.8	17631.4	18052.5	18479.1	18910.7	19347.3	19788.6	20234.4	20684.6	21139	21597.5	22059.9	22526.1	22995.7	23468.7	23944.7	24423.6	24905.1	25389.1	25875.2	26363	26852.3	27342.8	27834.3	28326.5	28819.4	29312.9	29806.6	30300.3	30793.7	31286.4
67	Medium variant	Guinea-Bissau		624	1770.53	1815.7	1861.28	1907.27	1953.72	2000.69	2048.14	2096.01	2144.25	2192.88	2241.86	2291.2	2340.89	2390.98	2441.53	2492.58	2544.12	2596.17	2648.73	2701.82	2755.47	2809.66	2864.36	2919.55	2975.17	3031.2	3087.56	3144.25	3201.21	3258.37	3315.68	3373.08	3430.55	3488.02	3545.44	3602.74	3659.89	3716.86	3773.62	3830.14	3886.4	3942.35	3998.01	4053.36	4108.4
68	Medium variant	Liberia		430	4499.62	4613.82	4731.91	4853.52	4977.72	5103.85	5232.08	5362.86	5496.18	5631.94	5770.1	5910.63	6053.51	6198.65	6345.96	6495.38	6646.81	6800.2	6955.48	7112.53	7271.26	7431.61	7593.5	7756.85	7921.58	8087.61	8254.89	8423.32	8592.84	8763.36	8934.81	9107.1	9280.2	9454.06	9628.68	9804.03	9980.08	10156.7	10333.9	10511.5	10689.4	10867.5	11045.8	11224.3	11402.8
69	Medium variant	Mali		466	17467.9	17994.8	18542	19107.7	19689.1	20284.2	20892.6	21515.3	22152.9	22806.2	23475.7	24161.5	24862.9	25579.7	26311.3	27057.1	27816.8	28590	29376	30173.9	30983	31802.7	32632.5	33471.5	34318.8	35173.8	36035.7	36904.2	37778.5	38658	39542.1	40430.3	41322.2	42217.8	43117.1	44020.2	44926.6	45836	46747.8	47661.2	48575.9	49491.2	50406.8	51322.5	52238.2
70	Medium variant	Mauritania		478	4182.34	4301.02	4420.18	4540.07	4661.15	4783.77	4907.91	5033.38	5160.07	5287.88	5416.71	5546.52	5677.34	5809.25	5942.33	6076.67	6212.25	6349.04	6487.02	6626.12	6766.33	6907.6	7049.9	7193.18	7337.36	7482.41	7628.25	7774.83	7922.07	8069.9	8218.23	8367.01	8516.17	8665.62	8815.26	8965	9114.77	9264.53	9414.23	9563.83	9713.32	9862.63	10011.7	10160.5	10309
71	Medium variant	Niger		562	19897	20673	21477.3	22311.4	23176.7	24074.7	25006.2	25971.6	26971.8	28007.2	29078.6	30186.5	31331.5	32514	33734.6	34993.5	36291.2	37627.9	39004	40419.8	41875.5	43371.2	44907	46482.9	48098.9	49754.9	51450.9	53186.6	54961.7	56775.7	58628.3	60519	62447.3	64412.8	66415.2	68453.7	70527.9	72636.9	74780	76956.1	79164.5	81404.1	83673.9	85973	88300.4
72	Medium variant	Nigeria		566	181182	185990	190886	195875	200962	206153	211447	216844	222348	227963	233692	239535	245493	251568	257759	264068	270493	277034	283688	290452	297323	304299	311376	318551	325818	333172	340610	348129	355724	363389	371119	378912	386762	394668	402628	410638	418696	426797	434937	443110	451311	459535	467782	476049	484337
73	Medium variant	Saint Helena	3	654	4.034	4.035	4.049	4.074	4.096	4.126	4.147	4.171	4.187	4.211	4.224	4.244	4.257	4.279	4.292	4.303	4.311	4.319	4.32	4.325	4.327	4.324	4.325	4.318	4.313	4.303	4.288	4.278	4.272	4.257	4.246	4.236	4.218	4.21	4.196	4.181	4.17	4.161	4.16	4.142	4.132	4.124	4.114	4.105	4.096
74	Medium variant	Senegal		686	14977	15411.6	15850.6	16294.3	16743.9	17200.2	17663	18131.9	18607	19088.5	19576.8	20071.8	20573.6	21082.5	21599	22123.2	22655.3	23195.1	23742.8	24298.2	24861.3	25431.9	26010	26595.1	27187	27785.2	28389.5	28999.5	29614.9	30235	30859.2	31487.2	32118.8	32753.5	33390.9	34030.6	34672.4	35315.9	35961	36607.5	37255.1	37903.8	38553.3	39203.6	39854.8
75	Medium variant	Sierra Leone		694	7237.02	7396.19	7557.21	7719.73	7883.12	8046.93	8211.07	8375.68	8540.92	8706.97	8873.98	9041.92	9210.65	9379.98	9549.68	9719.53	9889.41	10059.3	10229	10398.4	10567.5	10736.2	10904.2	11071.5	11237.8	11403.1	11567.1	11729.8	11891.1	12050.9	12209	12365.3	12519.7	12672.3	12822.9	12971.6	13118.3	13262.8	13405	13544.8	13681.8	13816.2	13947.7	14076.3	14202.1
76	Medium variant	Togo		768	7416.8	7606.37	7797.69	7990.93	8186.38	8384.29	8584.63	8787.33	8992.58	9200.53	9411.36	9625.07	9841.6	10060.9	10282.8	10507.2	10734.1	10963.4	11194.8	11428.2	11663.3	11900.2	12138.5	12378.1	12618.9	12860.7	13103.3	13346.6	13590.5	13834.6	14078.7	14322.8	14566.7	14810.6	15054.4	15298.2	15541.9	15785.5	16028.8	16271.6	16513.7	16755	16995.5	17235.2	17474.1
77	Medium variant	ASIA		935	4.4199e+06	4.46268e+06	4.50443e+06	4.54513e+06	4.58481e+06	4.62345e+06	4.66104e+06	4.6975e+06	4.73282e+06	4.76697e+06	4.79991e+06	4.83164e+06	4.86215e+06	4.89146e+06	4.91959e+06	4.94659e+06	4.97244e+06	4.99716e+06	5.02074e+06	5.04318e+06	5.06448e+06	5.08464e+06	5.10369e+06	5.12164e+06	5.13854e+06	5.15442e+06	5.16929e+06	5.18314e+06	5.19598e+06	5.20779e+06	5.21856e+06	5.22829e+06	5.237e+06	5.24467e+06	5.25132e+06	5.25693e+06	5.26152e+06	5.2651e+06	5.26768e+06	5.26929e+06	5.26993e+06	5.26963e+06	5.26841e+06	5.26632e+06	5.2634e+06
78	Medium variant	Eastern Asia		906	1.63515e+06	1.64191e+06	1.64816e+06	1.65388e+06	1.65904e+06	1.66362e+06	1.66759e+06	1.67095e+06	1.67372e+06	1.67593e+06	1.67763e+06	1.67882e+06	1.6795e+06	1.67969e+06	1.6794e+06	1.67865e+06	1.67746e+06	1.67584e+06	1.67379e+06	1.67134e+06	1.6685e+06	1.66526e+06	1.66166e+06	1.6577e+06	1.65341e+06	1.6488e+06	1.64388e+06	1.63867e+06	1.63315e+06	1.62734e+06	1.62123e+06	1.61483e+06	1.60816e+06	1.60121e+06	1.59398e+06	1.58649e+06	1.57874e+06	1.57075e+06	1.56253e+06	1.55411e+06	1.5455e+06	1.53672e+06	1.52779e+06	1.51874e+06	1.5096e+06
79	Medium variant	China	4	156	1.39703e+06	1.4035e+06	1.40952e+06	1.41505e+06	1.42006e+06	1.42455e+06	1.42848e+06	1.43185e+06	1.43468e+06	1.437e+06	1.43884e+06	1.44021e+06	1.44111e+06	1.44156e+06	1.44157e+06	1.44118e+06	1.44039e+06	1.43922e+06	1.43767e+06	1.43576e+06	1.43351e+06	1.43092e+06	1.42801e+06	1.42479e+06	1.42127e+06	1.41747e+06	1.4134e+06	1.40905e+06	1.40443e+06	1.39954e+06	1.39436e+06	1.38891e+06	1.38319e+06	1.37721e+06	1.37096e+06	1.36446e+06	1.3577e+06	1.3507e+06	1.34349e+06	1.33608e+06	1.3285e+06	1.32076e+06	1.31288e+06	1.30489e+06	1.29682e+06
80	Medium variant	China, Hong Kong SAR	5	344	7245.7	7302.84	7364.88	7428.89	7490.78	7547.65	7598.19	7643.26	7684.8	7725.86	7768.51	7813.3	7859.21	7904.81	7947.99	7987.25	8022.2	8053.25	8080.7	8105.05	8126.74	8145.82	8162.25	8176.35	8188.51	8199.06	8208.19	8216	8222.74	8228.62	8233.79	8238.41	8242.59	8246.4	8249.91	8253.14	8256.18	8259.04	8261.76	8264.36	8266.85	8269.23	8271.46	8273.46	8275.05
81	Medium variant	China, Macao SAR	6	446	600.942	612.167	622.567	632.418	642.09	651.875	661.838	671.858	681.876	691.748	701.381	710.768	719.928	728.851	737.513	745.908	754.011	761.85	769.424	776.756	783.877	790.784	797.489	804.016	810.408	816.675	822.835	828.901	834.885	840.815	846.711	852.577	858.409	864.203	869.922	875.543	881.078	886.517	891.846	897.082	902.195	907.196	912.081	916.841	921.456
82	Medium variant	China, Taiwan Province of China		158	23485.8	23556.7	23626.5	23694.1	23758.2	23817.9	23872.7	23922.7	23968.1	24008.9	24045.2	24076.9	24103.4	24124.7	24140.6	24150.7	24155.1	24153.2	24144.3	24127	24100.5	24064.6	24019.5	23965.2	23902	23830.3	23750.2	23662.1	23566.8	23465.5	23359.3	23248.6	23133.9	23015.5	22894.3	22770.5	22644.7	22517.2	22388.3	22258.2	22127.3	21995.7	21863.5	21730.9	21597.8
83	Medium variant	Dem. People's Republic of Korea		408	25243.9	25368.6	25491	25610.7	25727.4	25840.9	25950.8	26056.9	26159	26257.1	26350.9	26440.3	26525	26604.3	26677.5	26743.9	26803.4	26855.9	26901.5	26940.2	26972	26997	27015.4	27027.4	27033.7	27034.5	27030.2	27021	27007.2	26989.1	26967.3	26941.8	26913	26881.1	26846.3	26808.7	26768.5	26726	26681.3	26634.7	26586.2	26536.2	26484.7	26431.7	26377.3
84	Medium variant	Japan		392	127975	127749	127484	127185	126855	126496	126109	125697	125259	124796	124310	123801	123273	122725	122160	121581	120987	120382	119765	119138	118500	117853	117198	116539	115876	115212	114548	113885	113226	112571	111923	111283	110650	110024	109406	108794	108190	107592	106998	106403	105805	105204	104599	103988	103371
85	Medium variant	Mongolia		496	2976.88	3027.4	3075.65	3121.77	3166.24	3209.4	3251.15	3291.24	3329.75	3366.71	3402.26	3436.42	3469.24	3500.84	3531.37	3560.96	3589.67	3617.58	3644.86	3671.64	3698.06	3724.19	3750.09	3775.81	3801.44	3827	3852.53	3878.01	3903.44	3928.78	3953.99	3979.07	4003.93	4028.41	4052.29	4075.38	4097.63	4119.01	4139.4	4158.68	4176.78	4193.68	4209.38	4223.95	4237.5
86	Medium variant	Republic of Korea		410	50593.7	50791.9	50982.2	51164.4	51339.2	51507	51666.7	51817.2	51959.1	52093.1	52219.3	52337.7	52446.8	52545.2	52630.8	52701.8	52757.7	52797.7	52820.4	52823.5	52805.8	52766.7	52706.3	52625.7	52526.3	52409.4	52275.6	52125.1	51959.2	51779.2	51586.2	51381.2	51164.9	50938.2	50701.9	50456.8	50203.9	49943.9	49677.9	49406.9	49131.7	48853.1	48571.7	48288.5	48004.7
87	Medium variant	South-Central Asia	7	921	1.89201e+06	1.91605e+06	1.93982e+06	1.96331e+06	1.98652e+06	2.00944e+06	2.03205e+06	2.05433e+06	2.07623e+06	2.09771e+06	2.11873e+06	2.13927e+06	2.15931e+06	2.17885e+06	2.19788e+06	2.21642e+06	2.23445e+06	2.25195e+06	2.26893e+06	2.28537e+06	2.30127e+06	2.31662e+06	2.33141e+06	2.34567e+06	2.35942e+06	2.37265e+06	2.38537e+06	2.39759e+06	2.40929e+06	2.42046e+06	2.4311e+06	2.44121e+06	2.45078e+06	2.45981e+06	2.46829e+06	2.47623e+06	2.48361e+06	2.49044e+06	2.49671e+06	2.50242e+06	2.50756e+06	2.51214e+06	2.51616e+06	2.51963e+06	2.52256e+06
88	Medium variant	Central Asia		5500	68705	69787.8	70839.7	71860.5	72853.5	73821.1	74761.4	75671.1	76550.6	77400.8	78222.8	79017	79784.7	80529.8	81257.8	81972.7	82676.3	83369.2	84053.8	84732.3	85406.3	86076.8	86743.5	87405.7	88062.1	88711.1	89352.2	89984.7	90605.7	91211.6	91799.6	92368.4	92917.5	93445.2	93950.2	94431.4	94888	95320.2	95728	96112.3	96473.6	96812.4	97129.1	97425.5	97703.5
89	Medium variant	Kazakhstan		398	17749.6	17987.7	18204.5	18403.9	18593	18777.1	18956.9	19130.1	19297	19457	19610.3	19757.1	19898.5	20035.5	20169.4	20301.3	20431.8	20561.3	20690.5	20820	20950.4	21082	21214.9	21349.2	21484.6	21621.2	21758.7	21896.9	22035.4	22173.3	22310	22445.1	22578.4	22709.1	22836.3	22959.4	23078.1	23192.1	23301.4	23405.7	23505	23599.3	23688.6	23773.5	23854.4
90	Medium variant	Kyrgyzstan		417	5865.4	5955.73	6045.12	6132.93	6218.62	6301.72	6381.9	6459.06	6533.39	6605.29	6675.07	6742.76	6808.41	6872.4	6935.22	6997.28	7058.74	7119.63	7180.11	7240.3	7300.28	7360.13	7419.81	7479.19	7538.05	7596.18	7653.53	7710.05	7765.54	7819.76	7872.54	7923.78	7973.44	8021.47	8067.88	8112.65	8155.77	8197.2	8236.95	8275.02	8311.42	8346.16	8379.29	8410.91	8441.11
91	Medium variant	Tajikistan		762	8548.65	8734.95	8921.34	9107.21	9292	9475.25	9656.65	9835.99	10013.1	10187.9	10360.4	10530.4	10698.2	10864.3	11029.5	11194.4	11359.3	11524.1	11689.3	11855.5	12022.9	12191.7	12361.6	12532.6	12704.2	12876.1	13048.1	13220	13391.1	13560.6	13727.8	13892.4	14054.2	14213.1	14368.8	14521.3	14670.3	14815.9	14958.1	15097.2	15233.3	15366.5	15496.9	15624.6	15750.2
92	Medium variant	Turkmenistan		795	5565.28	5662.54	5758.07	5851.47	5942.56	6031.19	6117.01	6199.73	6279.41	6356.28	6430.54	6502.2	6571.31	6638.25	6703.49	6767.42	6830.19	6891.89	6952.81	7013.27	7073.5	7133.6	7193.55	7253.24	7312.51	7371.18	7429.2	7486.5	7542.76	7597.67	7650.91	7702.35	7751.95	7799.48	7844.75	7887.62	7928	7965.92	8001.41	8034.62	8065.65	8094.56	8121.4	8146.32	8169.55
93	Medium variant	Uzbekistan		860	30976	31446.8	31910.6	32365	32807.4	33235.8	33649	34046.2	34427.7	34794.3	35146.6	35484.6	35808.3	36119.5	36420.2	36712.3	36996.2	37272.3	37541.1	37803.2	38059.3	38309.4	38553.6	38791.5	39022.7	39246.5	39462.8	39671.2	39870.8	40060.2	40238.3	40404.8	40559.4	40702	40832.4	40950.4	41055.9	41149.1	41230.2	41299.7	41358.2	41405.8	41442.9	41470.2	41488.3
94	Medium variant	Southern Asia		5501	1.82331e+06	1.84627e+06	1.86898e+06	1.89145e+06	1.91367e+06	1.93562e+06	1.95729e+06	1.97865e+06	1.99968e+06	2.02031e+06	2.04051e+06	2.06025e+06	2.07952e+06	2.09832e+06	2.11663e+06	2.13445e+06	2.15177e+06	2.16859e+06	2.18488e+06	2.20064e+06	2.21586e+06	2.23054e+06	2.24467e+06	2.25827e+06	2.27135e+06	2.28394e+06	2.29602e+06	2.3076e+06	2.31868e+06	2.32925e+06	2.3393e+06	2.34884e+06	2.35786e+06	2.36636e+06	2.37434e+06	2.3818e+06	2.38872e+06	2.39512e+06	2.40098e+06	2.40631e+06	2.41109e+06	2.41533e+06	2.41903e+06	2.4222e+06	2.42485e+06
95	Medium variant	Afghanistan		4	33736.5	34656	35530.1	36373.2	37209	38054.9	38913.7	39779.1	40649.2	41520	42388.4	43254.4	44119.3	44982.3	45842.7	46699.5	47552.3	48400.3	49242.8	50078.8	50907.6	51728.3	52540.4	53342.7	54134.2	54914.1	55681.7	56436.3	57177.1	57903.4	58614.3	59309.4	59988.2	60650.8	61297.4	61928.1	62542.6	63140.6	63721.9	64286.4	64833.9	65364.2	65877.1	66372.2	66849.1
96	Medium variant	Bangladesh		50	161201	162952	164670	166368	168066	169775	171500	173229	174947	176631	178263	179836	181353	182815	184224	185585	186895	188151	189354	190504	191601	192643	193633	194570	195457	196294	197083	197824	198515	199155	199744	200281	200767	201203	201589	201927	202216	202458	202653	202800	202902	202958	202970	202937	202860
97	Medium variant	Bhutan		64	787.386	797.765	807.61	817.054	826.229	835.245	844.152	852.909	861.502	869.835	877.866	885.608	893.058	900.219	907.107	913.697	920.013	926.035	931.797	937.288	942.541	947.543	952.313	956.838	961.15	965.239	969.113	972.767	976.219	979.449	982.468	985.267	987.846	990.201	992.324	994.203	995.848	997.251	998.393	999.275	999.896	1000.24	1000.33	1000.15	999.7
98	Medium variant	India		356	1.30905e+06	1.32417e+06	1.33918e+06	1.35405e+06	1.36874e+06	1.3832e+06	1.39742e+06	1.41142e+06	1.42516e+06	1.43864e+06	1.45183e+06	1.46473e+06	1.47731e+06	1.48956e+06	1.50146e+06	1.51299e+06	1.52412e+06	1.53487e+06	1.5452e+06	1.55511e+06	1.56457e+06	1.57358e+06	1.58215e+06	1.59028e+06	1.59801e+06	1.60536e+06	1.61232e+06	1.61891e+06	1.62512e+06	1.63098e+06	1.6365e+06	1.64167e+06	1.6465e+06	1.65099e+06	1.65515e+06	1.65898e+06	1.66247e+06	1.66563e+06	1.66846e+06	1.67094e+06	1.67308e+06	1.67486e+06	1.6763e+06	1.67739e+06	1.67815e+06
99	Medium variant	Iran (Islamic Republic of)		364	79360.5	80277.4	81162.8	82011.7	82820.8	83587.1	84308	84981.8	85608.9	86190.8	86729.8	87225.9	87681	88100.9	88492.9	88863.3	89214.5	89547.8	89867.1	90176.4	90478.8	90775.6	91066.9	91352.3	91630.4	91899.5	92159.1	92407.9	92641.7	92855.6	93045.1	93208.3	93343.8	93448.5	93519.3	93553.5	93549.8	93507.6	93426.5	93306.3	93147.4	92949.9	92714.5	92443.1	92138.2
100	Medium variant	Maldives		462	418.403	427.756	436.33	444.259	451.738	458.909	465.782	472.334	478.508	484.309	489.695	494.699	499.335	503.688	507.806	511.766	515.596	519.304	522.911	526.456	529.943	533.391	536.815	540.219	543.603	546.961	550.3	553.607	556.862	560.042	563.119	566.092	568.924	571.619	574.133	576.435	578.53	580.384	582.014	583.406	584.547	585.449	586.096	586.493	586.671
101	Medium variant	Nepal		524	28656.3	28982.8	29305	29624	29942	30260.2	30578.4	30894.9	31207.7	31514.6	31813.6	32103.9	32385.2	32656.7	32917.7	33167.6	33406.1	33632.9	33848.4	34052.9	34246.9	34430.4	34603.5	34767	34921.7	35068.4	35207.5	35338.8	35462.4	35578.1	35685.9	35785.7	35877.5	35961.6	36038	36106.6	36167.5	36220.5	36265.2	36301.2	36328	36345.6	36353.9	36352.7	36341.9
102	Medium variant	Pakistan		586	189381	193203	197016	200814	204596	208362	212107	215824	219509	223158	226768	230336	233863	237353	240813	244248	247659	251045	254410	257758	261093	264415	267722	271007	274267	277495	280687	283842	286952	290008	293003	295934	298797	301589	304305	306940	309494	311964	314352	316660	318888	321037	323107	325099	327016
103	Medium variant	Sri Lanka		144	20714	20798.5	20876.9	20950	21018.9	21084	21146	21204.5	21258.7	21307.5	21349.9	21385.8	21415.5	21439.7	21459.2	21474.7	21486.4	21494	21497.5	21496.9	21491.9	21482.6	21469	21450.6	21427	21397.7	21362.7	21322.1	21275.7	21223.4	21165.1	21100.8	21030.8	20955.6	20875.9	20792.4	20705.2	20614.6	20521	20424.7	20325.9	20225.1	20122.3	20017.8	19912
104	Medium variant	South-Eastern Asia		920	634610	641776	648780	655637	662375	669016	675556	681978	688271	694421	700417	706254	711933	717449	722802	727991	733013	737868	742555	747076	751433	755625	759652	763517	767222	770770	774162	777399	780479	783400	786163	788768	791216	793510	795654	797649	799498	801202	802764	804183	805462	806602	807607	808481	809228
105	Medium variant	Brunei Darussalam		96	417.542	423.196	428.697	434.076	439.336	444.519	449.613	454.592	459.448	464.176	468.771	473.231	477.556	481.742	485.774	489.666	493.412	496.991	500.435	503.716	506.838	509.81	512.631	515.306	517.829	520.202	522.457	524.557	526.531	528.383	530.096	531.681	533.142	534.479	535.674	536.723	537.632	538.404	539.029	539.509	539.86	540.064	540.139	540.077	539.889
106	Medium variant	Cambodia		116	15517.6	15762.4	16005.4	16245.7	16482.6	16715.5	16943.7	17166.9	17385.3	17599.1	17808.7	18013.9	18214.8	18411.9	18606.1	18797.9	18987.4	19174.7	19359.8	19542.8	19723.8	19902.7	20079.5	20253.7	20424.8	20592.4	20756.4	20916.6	21072.5	21223.6	21369.6	21510.1	21645.2	21775	21899.5	22019	22133.5	22242.8	22347.1	22446.5	22540.9	22630.6	22715.5	22795.6	22871.2
107	Medium variant	Indonesia		360	258162	261115	263991	266795	269536	272223	274854	277425	279934	282377	284751	287056	289292	291459	293560	295595	297565	299468	301302	303067	304759	306378	307924	309399	310802	312134	313396	314588	315709	316757	317732	318634	319465	320226	320921	321551	322118	322623	323069	323457	323791	324071	324301	324481	324616
108	Medium variant	Lao People's Democratic Republic		418	6663.97	6758.35	6858.16	6961.21	7064.24	7164.82	7262.3	7357.21	7449.77	7540.49	7629.77	7717.46	7803.22	7887.02	7968.85	8048.7	8126.51	8202.24	8275.83	8347.25	8416.47	8483.42	8548.08	8610.41	8670.36	8727.91	8783	8835.64	8885.75	8933.27	8978.15	9020.36	9059.91	9096.82	9131.13	9162.89	9192.11	9218.77	9242.87	9264.39	9283.33	9299.7	9313.51	9324.8	9333.57
109	Medium variant	Malaysia	8	458	30723.2	31187.3	31624.3	32042.5	32454.5	32869.3	33289.2	33710.8	34131.2	34545.4	34949.8	35343.8	35728.2	36102.1	36464.6	36815	37152.8	37478	37790.7	38091.5	38380.7	38658.5	38925.2	39181.6	39429	39668.3	39899.8	40123.9	40341.5	40553.6	40760.9	40963.8	41162.3	41356.3	41545.3	41729.2	41907.8	42081	42248	42408.1	42560.5	42704.9	42841	42968.3	43086.3
110	Medium variant	Myanmar		104	52403.7	52885.2	53370.6	53855.7	54336.1	54808.3	55269.4	55718.4	56155.8	56583.2	57001.5	57410.1	57807.3	58191.7	58561.7	58915.9	59253.6	59574.5	59878	60163.6	60430.9	60679.7	60909.8	61121.2	61314.3	61489.1	61645.8	61784.9	61907.1	62013.5	62104.9	62182	62245	62295	62332.7	62358.9	62374.2	62379	62373.7	62358.5	62333.9	62300.1	62257.4	62206	62145.9
111	Medium variant	Philippines		608	101716	103320	104918	106512	108106	109703	111303	112902	114497	116086	117665	119233	120788	122331	123860	125372	126868	128347	129807	131247	132668	134067	135445	136801	138136	139448	140737	142004	143248	144468	145665	146837	147986	149111	150213	151293	152351	153387	154398	155384	156342	157273	158176	159052	159901
112	Medium variant	Singapore		702	5535.26	5622.45	5708.84	5791.9	5868.1	5935.05	5991.8	6039.58	6080.86	6119.2	6157.27	6195.86	6234.36	6272.27	6308.56	6342.47	6374.05	6403.64	6431.18	6456.59	6479.85	6500.92	6519.79	6536.43	6550.85	6563.06	6573.04	6580.83	6586.54	6590.27	6592.12	6592.17	6590.44	6586.97	6581.73	6574.76	6566.11	6555.86	6544.18	6531.21	6517.11	6501.97	6485.84	6468.8	6450.91
113	Medium variant	Thailand		764	68657.6	68863.5	69037.5	69183.2	69306.2	69410.9	69498.1	69567.5	69620.7	69659.6	69685.5	69699.2	69701	69690.1	69665.5	69626.2	69572.2	69503.6	69419.3	69318.3	69199.7	69063.1	68908.6	68736.2	68546.1	68338.5	68113.5	67871.4	67612.5	67337.1	67045.5	66738.6	66416.8	66081.2	65732.7	65372.3	65001	64619.7	64230	63833.7	63432.3	63026.8	62618.3	62207.9	61797.1
114	Medium variant	Timor-Leste		626	1240.98	1268.67	1296.31	1324.09	1352.36	1381.4	1411.19	1441.61	1472.63	1504.22	1536.34	1568.99	1602.14	1635.74	1669.75	1704.11	1738.77	1773.74	1808.94	1844.36	1879.94	1915.67	1951.5	1987.44	2023.46	2059.55	2095.7	2131.89	2168.1	2204.29	2240.42	2276.5	2312.52	2348.53	2384.59	2420.76	2457.05	2493.43	2529.88	2566.36	2602.84	2639.3	2675.73	2712.12	2748.43
115	Medium variant	Viet Nam		704	93571.6	94569.1	95540.8	96491.1	97429.1	98360.1	99284.1	100195	101084	101943	102764	103543	104284	104986	105652	106284	106881	107446	107981	108494	108988	109466	109928	110374	110808	111229	111639	112036	112421	112791	113145	113481	113800	114099	114376	114630	114859	115064	115242	115394	115518	115614	115683	115724	115739
116	Medium variant	Western Asia		922	258124	262938	267660	272298	276869	281382	285844	290252	294605	298898	303128	307296	311407	315472	319506	323521	327520	331501	335460	339389	343283	347141	350962	354746	358493	362200	365866	369489	373065	376591	380065	383483	386844	390146	393385	396560	399668	402708	405680	408581	411411	414168	416854	419469	422016
117	Medium variant	Armenia		51	2916.95	2924.82	2930.45	2934.15	2936.71	2938.68	2939.94	2940.09	2939.17	2937.24	2934.37	2930.59	2925.92	2920.45	2914.27	2907.46	2900.08	2892.15	2883.79	2875.1	2866.15	2857	2847.66	2838.11	2828.36	2818.4	2808.23	2797.84	2787.16	2776.11	2764.62	2752.66	2740.25	2727.37	2714.02	2700.18	2685.88	2671.11	2655.89	2640.27	2624.29	2607.94	2591.26	2574.28	2557.05
118	Medium variant	Azerbaijan	9	31	9617.48	9725.38	9827.59	9923.91	10014.6	10099.7	10179.1	10252.6	10320.4	10383.4	10442.1	10496.6	10547	10594	10638.2	10680.2	10720.2	10758.4	10794.6	10828.8	10860.9	10891	10919.1	10945	10968.3	10988.9	11006.7	11021.7	11033.8	11043	11049.4	11052.8	11053.4	11051.3	11046.5	11039.2	11029.4	11017.3	11003.1	10986.9	10969	10949.5	10928.5	10906.1	10882.3
119	Medium variant	Bahrain		48	1371.86	1425.17	1492.58	1566.99	1637.9	1697.77	1744.3	1780.09	1808.44	1834.61	1862.4	1892.62	1923.91	1955.38	1985.49	2013.13	2038.23	2061.33	2082.72	2102.82	2121.98	2140.27	2157.66	2174.24	2190.08	2205.23	2219.78	2233.76	2247.21	2260.12	2272.49	2284.35	2295.74	2306.66	2317.12	2327.11	2336.66	2345.76	2354.46	2362.76	2370.68	2378.23	2385.42	2392.23	2398.63
120	Medium variant	Cyprus	10	196	1160.98	1170.12	1179.55	1189.09	1198.43	1207.34	1215.85	1224.03	1231.94	1239.63	1247.14	1254.48	1261.65	1268.66	1275.51	1282.2	1288.74	1295.15	1301.41	1307.55	1313.54	1319.41	1325.16	1330.76	1336.2	1341.46	1346.54	1351.44	1356.13	1360.63	1364.92	1368.99	1372.84	1376.45	1379.79	1382.84	1385.6	1388.06	1390.26	1392.2	1393.91	1395.38	1396.62	1397.66	1398.48
121	Medium variant	Georgia	11	268	3951.52	3925.41	3912.06	3907.13	3904.2	3898.53	3888.72	3875.91	3860.78	3844.85	3829.22	3813.76	3797.88	3781.63	3765.09	3748.35	3731.43	3714.37	3697.22	3680.01	3662.82	3645.65	3628.5	3611.35	3594.18	3576.93	3559.61	3542.23	3524.68	3506.9	3488.8	3470.36	3451.61	3432.55	3413.22	3393.66	3373.88	3353.88	3333.72	3313.41	3293	3272.5	3251.96	3231.42	3210.93
122	Medium variant	Iraq		368	36115.6	37202.6	38274.6	39339.8	40412.3	41502.9	42612.2	43736.2	44875.4	46029.8	47199.7	48385.5	49588.1	50807.6	52044.1	53297.7	54568.2	55855.8	57160.5	58482.3	59821	61176.4	62548.1	63935.3	65336.9	66752	68180.1	69620.5	71072.5	72535	74007.1	75488	76977.4	78474.5	79979	81490.4	83008.2	84532	86061	87594.1	89130.8	90670.4	92212.7	93758.3	95308.1
123	Medium variant	Israel		376	8064.55	8191.83	8321.57	8452.84	8583.92	8713.56	8841.74	8969.11	9095.88	9222.42	9348.95	9475.56	9602.2	9729.01	9856.13	9983.65	10111.6	10240	10368.9	10498.3	10628	10758.1	10888.5	11019.3	11150.3	11281.6	11412.9	11544.4	11675.6	11806.6	11937	12066.8	12195.9	12324.1	12451.3	12577.3	12702.1	12825.6	12947.6	13068.2	13187.3	13304.8	13420.6	13534.9	13647.7
124	Medium variant	Jordan		400	9159.3	9455.8	9702.35	9903.8	10069.8	10208.7	10320.4	10405.4	10473.9	10538.9	10610.2	10692.5	10785.7	10889.7	11002.3	11122.1	11249.7	11386.4	11531.3	11683.2	11840.8	12003.8	12171.5	12341.8	12511.9	12679.8	12844.4	13005.5	13163.2	13318.1	13470.7	13620.7	13767.6	13911.1	14051.2	14187.7	14320.5	14449.6	14575.2	14697.3	14816.1	14931.8	15044.3	15153.6	15259.9
125	Medium variant	Kuwait		414	3935.79	4052.58	4136.53	4197.13	4248.97	4302.88	4361.47	4422.07	4483.9	4544.7	4602.91	4659.08	4714.48	4768.93	4822.08	4873.67	4923.7	4972.3	5019.63	5065.92	5111.32	5155.87	5199.49	5242.09	5283.58	5323.82	5362.82	5400.55	5436.87	5471.55	5504.48	5535.59	5564.94	5592.61	5618.77	5643.53	5666.97	5689.11	5710.01	5729.7	5748.26	5765.75	5782.28	5798	5813.1
126	Medium variant	Lebanon		422	5851.48	6006.67	6082.36	6093.51	6065.92	6019.8	5957.29	5875.22	5782.76	5690.35	5605.99	5534.57	5477.05	5432.3	5396.99	5368.6	5347.6	5335.2	5330.14	5330.74	5335.52	5344.02	5355.7	5368.87	5381.6	5392.42	5400.43	5405.66	5408.66	5410.53	5412.03	5413.18	5413.65	5413.53	5412.9	5411.83	5410.33	5408.4	5405.98	5402.98	5399.31	5394.93	5389.78	5383.71	5376.5
127	Medium variant	Oman		512	4199.81	4424.76	4636.26	4829.95	5001.88	5149.7	5270.23	5364.42	5439.59	5506.22	5572.15	5640.1	5708.57	5776.13	5839.77	5897.47	5949.43	5997.27	6042.14	6085.53	6128.59	6171.8	6215.12	6258.4	6301.29	6343.52	6385.08	6426.19	6467.13	6508.31	6549.89	6591.99	6634.35	6676.4	6717.34	6756.57	6793.85	6829.2	6862.52	6893.83	6923.1	6950.23	6975.15	6997.84	7018.3
128	Medium variant	Qatar		634	2481.54	2569.8	2639.21	2694.85	2743.9	2791.81	2840.4	2888.94	2937.16	2983.96	3028.57	3071.42	3113.3	3154.14	3193.72	3231.91	3268.8	3304.49	3338.81	3371.52	3402.5	3431.67	3459.22	3485.54	3511.21	3536.62	3561.93	3587.09	3612.01	3636.57	3660.62	3684.2	3707.32	3729.93	3751.93	3773.28	3793.93	3813.89	3833.1	3851.61	3869.37	3886.39	3902.66	3918.17	3932.92
129	Medium variant	Saudi Arabia		682	31557.1	32275.7	32938.2	33554.3	34140.7	34709.6	35262.7	35796	36311.1	36808.9	37290.3	37756.5	38208.6	38646.7	39070.7	39480.3	39876.6	40259.7	40628.5	40981.4	41317.4	41636.1	41938.5	42227.4	42506.3	42777.6	43042.3	43300	43550.3	43792.7	44026.5	44251.7	44468.4	44675.4	44871.8	45056.3	45228.9	45389.2	45536.6	45670.6	45790.7	45896.7	45988.9	46067.3	46132.4
130	Medium variant	State of Palestine	12	275	4662.88	4790.7	4920.72	5052.78	5186.79	5322.63	5460.16	5599.14	5739.32	5880.45	6022.27	6164.64	6307.52	6450.86	6594.7	6739.07	6883.9	7029.15	7174.82	7321	7467.68	7614.87	7762.5	7910.59	8059.12	8208.07	8357.43	8507.1	8657	8807.02	8957.05	9107	9256.81	9406.35	9555.52	9704.2	9852.32	9999.75	10146.4	10292.1	10436.6	10580	10722.2	10863	11002.6
131	Medium variant	Syrian Arab Republic		760	18735	18430.5	18269.9	18284.4	18499.2	18924.4	19586.1	20466.5	21475.3	22487.6	23410.9	24211.9	24907.2	25515	26072.7	26608.5	27120.8	27597.7	28045.7	28472.8	28885.2	29286.3	29677.3	30059.5	30433.3	30798.9	31158.1	31511.7	31858.6	32196.8	32524.9	32842.7	33151	33449.9	33739.8	34021.1	34293.7	34557.7	34813.5	35061.4	35301.8	35534.8	35760.4	35978.6	36189.7
132	Medium variant	Turkey		792	78271.5	79512.4	80745	81916.9	82961.8	83835.8	84514.6	85018.7	85404	85752.4	86124.9	86538.2	86980.3	87448.2	87930.1	88416.6	88912	89420.6	89932.6	90434.3	90915.3	91371.6	91804.6	92215.3	92606.7	92980.8	93337	93673.5	93990	94286	94561.4	94816	95049.5	95262.4	95454.7	95626.9	95778.9	95910.8	96022.3	96112.7	96182.1	96230.3	96257.8	96265	96252.6
133	Medium variant	United Arab Emirates		784	9154.3	9269.61	9400.15	9541.61	9682.09	9813.17	9937.48	10061.9	10186.5	10311	10435.3	10559.7	10684.4	10809	10932.6	11054.6	11174.7	11293.2	11410.3	11526.6	11642.3	11757.6	11872.2	11985.6	12097.4	12207.3	12315.1	12420.8	12523.9	12624.4	12721.9	12816.2	12907.5	12995.7	13081	13163.5	13243.3	13320.4	13394.8	13466.8	13536.3	13603.5	13668.5	13731.3	13792.1
134	Medium variant	Yemen		887	26916.2	27584.2	28250.4	28915.3	29580	30245.3	30910.8	31575.5	32239	32900.9	33560.6	34218	34872.7	35524.2	36171.9	36815.3	37453.9	38087.5	38716.4	39341.2	39962.1	40579	41191	41797.2	42396	42986.3	43567.4	44138.8	44700.2	45251.1	45791.1	46319.8	46836.3	47339.9	47829.4	48304	48763.2	49206.5	49633.7	50044.3	50438.3	50815.2	51175	51517.4	51842.6
135	Medium variant	EUROPE		908	740814	741447	742074	742648	743103	743390	743496	743438	743238	742931	742544	742084	741548	740933	740236	739456	738595	737662	736670	735631	734559	733458	732330	731179	730009	728823	727624	726410	725178	723924	722641	721330	719990	718613	717192	715721	714199	712627	711006	709339	707628	705875	704085	702265	700424
136	Medium variant	Eastern Europe		923	293244	292885	292454	291953	291392	290776	290105	289371	288575	287717	286799	285822	284790	283707	282579	281413	280210	278978	277727	276469	275214	273967	272732	271513	270315	269143	267998	266881	265789	264717	263659	262616	261585	260562	259542	258519	257492	256459	255418	254365	253298	252217	251123	250014	248891
137	Medium variant	Belarus		112	9485.77	9480.04	9468.34	9452.11	9433.87	9415.43	9397.05	9377.93	9357.68	9335.64	9311.38	9284.89	9256.51	9226.51	9195.27	9163.12	9130.21	9096.65	9062.76	9028.93	8995.43	8962.43	8930.01	8898.3	8867.38	8837.34	8808.22	8780.02	8752.61	8725.79	8699.41	8673.38	8647.68	8622.15	8596.61	8570.9	8544.96	8518.77	8492.25	8465.36	8438.08	8410.39	8382.32	8353.92	8325.3
138	Medium variant	Bulgaria		100	7177.4	7131.49	7084.57	7036.85	6988.74	6940.53	6892.21	6843.58	6794.49	6744.76	6694.23	6642.91	6590.87	6538.14	6484.77	6430.85	6376.4	6321.53	6266.49	6211.61	6157.14	6103.18	6049.79	5997.08	5945.16	5894.13	5844.04	5794.88	5746.57	5698.96	5651.93	5605.44	5559.47	5513.95	5468.78	5423.87	5379.18	5334.7	5290.34	5246.05	5201.79	5157.55	5113.35	5069.19	5025.11
139	Medium variant	Czechia		203	10603.8	10610.9	10618.3	10625.2	10630.6	10633.4	10633.9	10632.3	10628.5	10622.1	10612.9	10601	10586.5	10569.3	10549.9	10528.2	10504.4	10478.8	10451.9	10424.4	10396.8	10369.3	10342.2	10315.5	10289.7	10264.8	10241.1	10218.4	10196.7	10175.7	10155.1	10135	10115.1	10095.3	10075.1	10054.3	10032.7	10010.1	9986.45	9961.39	9934.79	9906.57	9876.76	9845.28	9812.16
140	Medium variant	Hungary		348	9783.92	9753.28	9721.56	9688.85	9655.36	9621.25	9586.48	9550.95	9514.62	9477.47	9439.47	9400.61	9360.91	9320.24	9278.44	9235.46	9191.26	9145.94	9099.59	9052.39	9004.47	8955.89	8906.75	8857.22	8807.52	8757.85	8708.27	8658.88	8609.78	8561.05	8512.78	8465.03	8417.79	8371.04	8324.7	8278.7	8233.04	8187.69	8142.53	8097.42	8052.24	8006.95	7961.55	7916.02	7870.27
141	Medium variant	Poland		616	38265.2	38224.4	38170.7	38104.8	38028.3	37942.2	37846.6	37741.1	37626.5	37503.6	37373.2	37235.7	37091.3	36939.9	36781.3	36615.5	36442.7	36263.3	36077.9	35887.2	35691.8	35491.9	35287.9	35080.2	34868.9	34654.6	34437.4	34217.6	33995.4	33771.1	33544.9	33316.9	33087.2	32856.1	32623.7	32390	32155.3	31919.4	31682.3	31443.9	31204.2	30963.3	30720.9	30476.7	30230.2
142	Medium variant	Republic of Moldova	13	498	4065.98	4059.61	4051.21	4041.07	4029.75	4017.69	4004.83	3990.97	3976.11	3960.23	3943.32	3925.43	3906.56	3886.7	3865.83	3843.94	3821.05	3797.22	3772.55	3747.15	3721.16	3694.59	3667.49	3639.97	3612.11	3583.99	3555.67	3527.16	3498.48	3469.63	3440.6	3411.42	3382.1	3352.61	3322.97	3293.16	3263.16	3232.99	3202.61	3172	3141.13	3110.01	3078.64	3046.99	3015.06
143	Medium variant	Romania		642	19876.6	19778.1	19679.3	19580.6	19483.4	19388.4	19295.1	19202.5	19110.3	19018.5	18927	18835.5	18743.9	18651.7	18558.6	18464.2	18368.5	18271.3	18172.9	18073.6	17973.6	17873	17771.6	17669.5	17566.7	17463.1	17358.8	17253.7	17148.1	17041.9	16935.3	16828.3	16721	16613.3	16505.4	16397.4	16289.2	16181	16072.6	15963.9	15854.9	15745.5	15636	15526.3	15416.7
144	Medium variant	Russian Federation		643	143888	143965	143990	143965	143896	143787	143637	143442	143204	142924	142607	142253	141866	141449	141006	140543	140063	139569	139068	138568	138076	137595	137127	136676	136245	135837	135453	135093	134755	134434	134127	133833	133550	133275	133003	132731	132456	132179	131896	131607	131310	131003	130689	130365	130034
145	Medium variant	Slovakia		703	5439.32	5444.22	5447.66	5449.82	5450.99	5451.4	5451.03	5449.68	5447.15	5443.26	5437.85	5430.88	5422.38	5412.31	5400.67	5387.46	5372.68	5356.44	5338.86	5320.19	5300.59	5280.15	5258.95	5237.15	5214.96	5192.52	5169.93	5147.23	5124.46	5101.65	5078.84	5056.02	5033.23	5010.43	4987.55	4964.54	4941.41	4918.09	4894.55	4870.69	4846.43	4821.77	4796.69	4771.12	4745.02
146	Medium variant	Ukraine	14	804	44657.7	44438.6	44222.9	44009.2	43795.2	43579.2	43361	43140.4	42916.3	42687.4	42452.6	42211.8	41965.1	41713.5	41458.2	41200.4	40940.2	40678.2	40415.8	40154.7	39896.3	39641.3	39389.7	39141.9	38898	38658	38422.1	38190.2	37961.9	37736.3	37512.9	37291.2	37071.3	36852.5	36634.1	36415.7	36197	35977.8	35757.8	35537	35315	35092	34867.9	34642.9	34417
147	Medium variant	Northern Europe		924	103097	103643	104200	104762	105319	105863	106395	106916	107426	107924	108409	108881	109340	109785	110216	110635	111039	111432	111813	112186	112553	112914	113270	113621	113968	114313	114656	114996	115334	115669	116000	116329	116653	116972	117282	117583	117873	118153	118422	118681	118928	119165	119392	119610	119821
148	Medium variant	Channel Islands	15	830	163.758	164.541	165.314	166.083	166.828	167.578	168.304	169.015	169.724	170.412	171.08	171.738	172.376	173.007	173.606	174.184	174.741	175.274	175.791	176.286	176.743	177.177	177.593	177.974	178.324	178.654	178.945	179.225	179.477	179.702	179.906	180.094	180.262	180.408	180.529	180.634	180.711	180.769	180.811	180.837	180.851	180.861	180.862	180.865	180.853
149	Medium variant	Denmark		208	5688.69	5711.87	5733.55	5754.36	5775.22	5796.8	5819.26	5842.42	5866.02	5889.67	5913.09	5936.21	5959.09	5981.55	6003.4	6024.52	6044.82	6064.3	6082.95	6100.78	6117.85	6134.13	6149.66	6164.48	6178.67	6192.28	6205.39	6218.02	6230.31	6242.39	6254.38	6266.36	6278.35	6290.36	6302.37	6314.4	6326.48	6338.62	6350.81	6363.06	6375.33	6387.63	6399.98	6412.39	6424.94
150	Medium variant	Estonia		233	1315.32	1312.44	1309.63	1306.79	1303.8	1300.56	1297.04	1293.23	1289.14	1284.76	1280.13	1275.23	1270.08	1264.72	1259.2	1253.59	1247.91	1242.16	1236.4	1230.66	1225	1219.43	1213.95	1208.55	1203.22	1197.94	1192.71	1187.54	1182.37	1177.19	1171.95	1166.65	1161.29	1155.85	1150.34	1144.75	1139.06	1133.28	1127.42	1121.47	1115.45	1109.35	1103.18	1096.95	1090.65
151	Medium variant	Faeroe Islands		234	48.965	49.117	49.29	49.489	49.692	49.896	50.103	50.304	50.507	50.715	50.932	51.151	51.383	51.608	51.841	52.067	52.296	52.525	52.745	52.964	53.166	53.361	53.542	53.715	53.881	54.026	54.169	54.298	54.416	54.53	54.631	54.722	54.802	54.879	54.961	55.022	55.091	55.15	55.223	55.286	55.353	55.424	55.493	55.564	55.642
152	Medium variant	Finland	16	246	5481.97	5503.13	5523.23	5542.52	5561.39	5580.13	5598.77	5617.16	5635.16	5652.53	5669.12	5684.88	5699.82	5713.89	5726.99	5739.1	5750.17	5760.27	5769.43	5777.72	5785.21	5791.95	5798.02	5803.54	5808.66	5813.53	5818.22	5822.79	5827.36	5832.07	5837.03	5842.31	5847.92	5853.83	5859.99	5866.35	5872.91	5879.68	5886.66	5893.82	5901.16	5908.64	5916.25	5924.01	5931.89
153	Medium variant	Iceland		352	330.243	332.474	335.025	337.78	340.566	343.228	345.764	348.218	350.597	352.91	355.184	357.41	359.573	361.662	363.692	365.646	367.521	369.325	371.06	372.716	374.297	375.809	377.255	378.616	379.919	381.151	382.312	383.42	384.454	385.432	386.349	387.201	388.002	388.747	389.435	390.071	390.65	391.186	391.672	392.121	392.533	392.911	393.259	393.569	393.859
154	Medium variant	Ireland		372	4700.11	4726.08	4761.66	4803.75	4847.14	4887.99	4925.84	4962.07	4996.85	5030.66	5063.88	5096.36	5127.9	5158.77	5189.35	5219.95	5250.64	5281.39	5312.23	5343.21	5374.34	5405.6	5436.99	5468.39	5499.61	5530.56	5561.14	5591.29	5620.86	5649.7	5677.67	5704.69	5730.7	5755.57	5779.18	5801.4	5822.21	5841.64	5859.72	5876.55	5892.22	5906.77	5920.26	5932.81	5944.58
155	Medium variant	Isle of Man		833	83.167	83.737	84.287	84.831	85.369	85.895	86.409	86.922	87.419	87.917	88.405	88.875	89.345	89.803	90.256	90.692	91.125	91.556	91.978	92.387	92.78	93.162	93.53	93.887	94.229	94.57	94.909	95.227	95.545	95.85	96.137	96.405	96.66	96.905	97.144	97.378	97.607	97.835	98.062	98.284	98.497	98.704	98.907	99.097	99.297
156	Medium variant	Latvia		428	1992.66	1970.53	1949.67	1929.94	1911.11	1892.99	1875.53	1858.75	1842.66	1827.31	1812.68	1798.81	1785.57	1772.74	1760.02	1747.19	1734.15	1720.95	1707.7	1694.63	1681.89	1669.5	1657.4	1645.6	1634.07	1622.75	1611.69	1600.85	1590.21	1579.66	1569.18	1558.72	1548.31	1537.91	1527.55	1517.2	1506.89	1496.57	1486.27	1475.99	1465.74	1455.5	1445.31	1435.16	1425.07
157	Medium variant	Lithuania		440	2931.93	2908.25	2890.3	2876.47	2864.46	2852.48	2840	2827.27	2814.24	2801.13	2788.01	2774.74	2761.06	2746.99	2732.52	2717.73	2702.56	2687.02	2671.18	2655.14	2639	2622.77	2606.47	2590.18	2573.98	2557.9	2541.99	2526.27	2510.73	2495.36	2480.14	2465.1	2450.22	2435.53	2421.03	2406.72	2392.61	2378.7	2364.97	2351.41	2338.01	2324.76	2311.66	2298.71	2285.88
158	Medium variant	Norway	17	578	5199.84	5254.69	5305.38	5353.36	5400.92	5449.69	5500.07	5551.48	5603.59	5655.75	5707.48	5758.74	5809.67	5860.15	5910.02	5959.22	6007.62	6055.25	6102.06	6148.02	6193.14	6237.41	6280.85	6323.52	6365.53	6406.96	6447.82	6488.14	6528.04	6567.68	6607.17	6646.56	6685.81	6724.82	6763.44	6801.52	6839.04	6876.02	6912.48	6948.4	6983.78	7018.63	7052.94	7086.73	7120.04
159	Medium variant	Sweden		752	9763.57	9837.53	9910.7	9982.71	10053.1	10121.7	10188.1	10252.4	10314.8	10375.7	10435.3	10493.8	10551.1	10606.8	10660.5	10712	10761.3	10808.5	10854.1	10898.6	10942.5	10985.8	11028.7	11071.5	11114.4	11157.9	11201.9	11246.5	11291.9	11337.9	11384.8	11432.4	11480.7	11529.4	11578.1	11626.3	11674	11721.1	11767.5	11813	11857.7	11901.3	11943.9	11985.6	12026.4
160	Medium variant	United Kingdom		826	65397.1	65788.6	66181.6	66573.5	66959	67334.2	67699.5	68056.8	68405.4	68744.7	69074	69393.3	69702.9	70003.2	70294.9	70578.6	70854.5	71123.2	71385.6	71643.2	71897.2	72148	72395.7	72640.8	72883.9	73125.2	73364.9	73602.7	73838.4	74071.3	74301	74527.4	74749.9	74967.4	75178.2	75381.1	75575.8	75762.4	75940.7	76110.4	76271.8	76424.7	76569.7	76708.1	76841.5
161	Medium variant	Southern Europe		925	152441	152172	151989	151860	151728	151553	151331	151080	150808	150528	150250	149973	149695	149413	149124	148825	148515	148194	147864	147524	147174	146814	146443	146060	145663	145252	144825	144381	143920	143440	142941	142420	141879	141316	140731	140123	139493	138840	138168	137478	136772	136051	135319	134576	133828
162	Medium variant	Albania		8	2923.35	2926.35	2930.19	2934.36	2938.43	2942.03	2944.8	2946.54	2947.34	2947.44	2946.99	2945.95	2944.15	2941.51	2937.96	2933.42	2927.86	2921.3	2913.72	2905.09	2895.45	2884.78	2873.13	2860.57	2847.18	2833.06	2818.26	2802.81	2786.78	2770.25	2753.28	2735.91	2718.19	2700.18	2681.96	2663.59	2645.09	2626.5	2607.8	2588.99	2570.06	2551.02	2531.87	2512.6	2493.2
163	Medium variant	Andorra		20	78.014	77.281	76.965	76.953	77.072	77.184	77.276	77.392	77.521	77.649	77.775	77.887	77.971	78.037	78.089	78.154	78.22	78.284	78.342	78.397	78.444	78.486	78.517	78.546	78.556	78.55	78.525	78.478	78.415	78.329	78.205	78.06	77.892	77.684	77.446	77.187	76.897	76.578	76.232	75.856	75.467	75.054	74.621	74.177	73.723
164	Medium variant	Bosnia and Herzegovina		70	3535.96	3516.82	3507.02	3503.55	3501.77	3498.21	3492.07	3484.27	3475.21	3465.71	3456.36	3447.05	3437.33	3427.11	3416.29	3404.78	3392.55	3379.6	3365.92	3351.52	3336.4	3320.58	3304.07	3286.94	3269.28	3251.17	3232.66	3213.76	3194.58	3175.21	3155.71	3136.15	3116.54	3096.97	3077.49	3058.14	3038.97	3019.99	3001.18	2982.53	2964.03	2945.69	2927.49	2909.37	2891.29
165	Medium variant	Croatia		191	4236.02	4213.27	4189.35	4164.78	4140.15	4115.95	4092.38	4069.42	4046.98	4024.85	4002.89	3981.1	3959.54	3938.17	3916.94	3895.78	3874.69	3853.65	3832.58	3811.43	3790.13	3768.66	3747.02	3725.25	3703.42	3681.56	3659.69	3637.8	3615.87	3593.89	3571.86	3549.76	3527.62	3505.43	3483.19	3460.9	3438.57	3416.21	3393.82	3371.41	3348.99	3326.58	3304.18	3281.8	3259.47
166	Medium variant	Gibraltar		292	34.228	34.408	34.571	34.733	34.879	35	35.124	35.233	35.327	35.417	35.501	35.588	35.671	35.748	35.821	35.897	35.964	36.033	36.099	36.166	36.229	36.283	36.347	36.41	36.466	36.526	36.591	36.65	36.707	36.76	36.819	36.874	36.918	36.975	37.017	37.053	37.09	37.13	37.164	37.192	37.216	37.233	37.255	37.258	37.267
167	Medium variant	Greece		300	11217.8	11183.7	11159.8	11142.2	11124.6	11102.6	11075.3	11044.7	11011.6	10977.8	10944.6	10912.1	10879.7	10847.5	10815.5	10783.6	10751.8	10720.1	10688.3	10656.4	10624.1	10591.3	10557.9	10523.8	10488.5	10451.9	10413.8	10374.1	10332.7	10289.2	10243.6	10195.6	10145.4	10093	10038.3	9981.57	9922.74	9861.95	9799.38	9735.24	9669.78	9603.12	9535.44	9467.04	9398.23
168	Medium variant	Holy See	18	336	0.803	0.801	0.792	0.801	0.799	0.801	0.8	0.799	0.799	0.807	0.801	0.798	0.8	0.8	0.799	0.797	0.803	0.804	0.8	0.799	0.795	0.793	0.804	0.799	0.802	0.798	0.8	0.806	0.811	0.809	0.808	0.807	0.805	0.802	0.802	0.806	0.808	0.804	0.81	0.818	0.815	0.821	0.817	0.816	0.811
169	Medium variant	Italy		380	59504.2	59429.9	59359.9	59291	59216.5	59132.1	59037.9	58937.5	58833	58727.5	58623	58520.5	58419.2	58318.2	58215.6	58109.9	58000.9	57888.8	57773.5	57655.4	57534.4	57410.2	57282.5	57150.7	57014.1	56872.2	56724.6	56571.2	56411.4	56244.9	56071.4	55890.8	55703	55507.7	55304.5	55093.2	54874.1	54647.7	54414.8	54176.3	53933.3	53686.5	53436.8	53185.6	52934.6
170	Medium variant	Malta		470	427.616	429.362	430.835	432.089	433.245	434.363	435.469	436.533	437.509	438.352	439.036	439.555	439.92	440.107	440.129	439.963	439.613	439.085	438.406	437.599	436.695	435.714	434.651	433.519	432.345	431.149	429.919	428.671	427.423	426.185	424.966	423.774	422.603	421.464	420.336	419.247	418.166	417.103	416.057	415.015	413.968	412.905	411.842	410.755	409.642
171	Medium variant	Montenegro		499	628.178	628.615	628.96	629.219	629.355	629.397	629.333	629.161	628.893	628.538	628.109	627.604	627.007	626.336	625.567	624.702	623.74	622.684	621.529	620.268	618.895	617.415	615.826	614.14	612.352	610.465	608.495	606.436	604.296	602.092	599.832	597.519	595.156	592.767	590.346	587.899	585.445	582.97	580.479	577.982	575.466	572.937	570.389	567.834	565.249
172	Medium variant	Portugal		620	10418.5	10371.6	10329.5	10291.2	10254.7	10218.4	10182.6	10148.1	10114.5	10081.2	10047.8	10014.2	9980.34	9946.17	9911.74	9877.06	9842.03	9806.52	9770.46	9733.75	9696.32	9658.1	9619.02	9578.94	9537.7	9495.17	9451.3	9406.04	9359.41	9311.4	9262.01	9211.26	9159.15	9105.68	9050.82	8994.59	8937.03	8878.25	8818.42	8757.73	8696.39	8634.52	8572.23	8509.66	8446.98
173	Medium variant	San Marino		674	32.96	33.203	33.4	33.557	33.683	33.809	33.924	34.037	34.138	34.238	34.327	34.41	34.493	34.568	34.632	34.688	34.75	34.8	34.838	34.87	34.902	34.927	34.945	34.959	34.968	34.965	34.964	34.952	34.94	34.919	34.895	34.862	34.83	34.791	34.753	34.704	34.651	34.596	34.537	34.474	34.41	34.351	34.287	34.22	34.154
174	Medium variant	Serbia	19	688	8851.28	8820.08	8790.57	8762.03	8733.41	8703.94	8673.36	8641.74	8609.11	8575.59	8541.29	8506.15	8470.02	8432.88	8394.7	8355.44	8315.13	8273.79	8231.44	8188.15	8143.97	8098.94	8053.15	8006.75	7959.92	7912.82	7865.54	7818.12	7770.73	7723.49	7676.52	7629.86	7583.57	7537.66	7492.15	7447.02	7402.31	7357.99	7313.96	7270.1	7226.28	7182.47	7138.68	7094.85	7050.95
175	Medium variant	Slovenia		705	2074.79	2077.86	2079.98	2081.26	2081.9	2082.05	2081.76	2081.04	2079.87	2078.22	2076.08	2073.48	2070.45	2067.04	2063.28	2059.21	2054.86	2050.25	2045.4	2040.36	2035.17	2029.85	2024.4	2018.83	2013.15	2007.34	2001.43	1995.41	1989.27	1982.97	1976.54	1969.95	1963.19	1956.27	1949.16	1941.85	1934.35	1926.65	1918.78	1910.75	1902.58	1894.28	1885.87	1877.37	1868.79
176	Medium variant	Spain	20	724	46397.7	46347.6	46354.3	46397.5	46441	46459.2	46449.6	46424	46386.9	46346	46306.8	46270.1	46233.6	46196.5	46157.4	46115.1	46069.5	46020.9	45969.7	45916.3	45860.8	45803.2	45742.8	45679.1	45611.3	45538.5	45460.4	45376.5	45285.8	45187.1	45079.7	44963	44836.9	44700.6	44553.3	44394.6	44224.3	44042.8	43850.5	43648.4	43437.3	43217.7	42990.2	42755.9	42516.2
177	Medium variant	TFYR Macedonia	21	807	2079.31	2081.21	2083.16	2085.05	2086.72	2088.03	2088.95	2089.47	2089.55	2089.18	2088.34	2086.99	2085.13	2082.75	2079.83	2076.35	2072.33	2067.78	2062.71	2057.17	2051.17	2044.74	2037.91	2030.72	2023.25	2015.55	2007.63	1999.53	1991.27	1982.89	1974.42	1965.87	1957.25	1948.56	1939.82	1931	1922.13	1913.18	1904.15	1895	1885.7	1876.26	1866.66	1856.91	1847
178	Medium variant	Western Europe		926	192032	192747	193431	194073	194664	195197	195666	196071	196428	196761	197086	197408	197723	198028	198316	198584	198830	199058	199266	199453	199619	199763	199886	199986	200062	200115	200145	200151	200135	200098	200041	199966	199873	199763	199637	199496	199341	199174	198998	198816	198629	198441	198252	198065	197885
179	Medium variant	Austria		40	8678.66	8712.14	8735.45	8751.82	8766.2	8782.21	8800.68	8820.47	8840.87	8860.57	8878.62	8895	8910.09	8923.73	8935.71	8945.88	8954.17	8960.62	8965.35	8968.57	8970.48	8971.1	8970.43	8968.62	8965.81	8962.11	8957.57	8952.22	8946.03	8938.99	8931.07	8922.32	8912.73	8902.22	8890.62	8877.86	8863.92	8848.91	8832.95	8816.15	8798.68	8780.59	8761.98	8743.04	8724.04
180	Medium variant	Belgium		56	11287.9	11358.4	11429.3	11498.5	11562.8	11620	11669.2	11711.3	11748.6	11783.9	11819.5	11856.1	11893.2	11930.3	11966.6	12001.6	12035.2	12067.8	12099.4	12130	12159.7	12188.4	12216.3	12243.1	12269	12293.9	12317.7	12340.6	12362.5	12383.3	12403.2	12422.2	12440.2	12457.2	12473.2	12488.2	12502.2	12515.2	12527.4	12538.9	12549.7	12560	12569.8	12579.2	12588.4
181	Medium variant	France		250	64457.2	64720.7	64979.5	65233.3	65480.7	65721.2	65954.7	66182.4	66405.2	66624.7	66842	67057.2	67270.2	67480.9	67689	67894.3	68096.6	68295.7	68490.3	68679	68860.6	69034.7	69201.2	69359.4	69508.6	69648.3	69778.4	69899	70010.8	70114.8	70211.6	70301.8	70385.6	70464	70538.1	70609	70677.2	70743.3	70807.3	70869.6	70930.3	70989.7	71048.4	71107.2	71166.6
182	Medium variant	Germany		276	81707.8	81914.7	82114.2	82293.5	82438.6	82540.4	82590.9	82591.8	82556.7	82506.1	82455	82407.6	82360	82310.2	82253.5	82186.7	82110.1	82025.8	81934.1	81835.4	81730.1	81618.3	81499.9	81374.3	81241	81099.6	80949.9	80792.3	80626.3	80452	80269.2	80078.3	79879.6	79673.3	79459.5	79238.5	79010.8	78777.6	78540.5	78302	78063.8	77827	77592.2	77361.4	77136.4
183	Medium variant	Liechtenstein		438	37.403	37.666	37.922	38.155	38.404	38.645	38.888	39.135	39.368	39.603	39.844	40.065	40.297	40.506	40.722	40.918	41.109	41.294	41.461	41.621	41.77	41.911	42.048	42.16	42.274	42.378	42.478	42.562	42.641	42.714	42.785	42.854	42.919	42.981	43.041	43.096	43.146	43.197	43.255	43.296	43.342	43.385	43.436	43.481	43.525
184	Medium variant	Luxembourg		442	566.741	575.747	583.455	590.321	596.992	603.944	611.338	618.998	626.791	634.437	641.757	648.718	655.418	661.932	668.387	674.864	681.385	687.929	694.466	700.955	707.373	713.713	719.995	726.203	732.355	738.428	744.431	750.354	756.22	762.035	767.807	773.542	779.238	784.874	790.443	795.916	801.298	806.595	811.815	816.953	822.022	827.027	831.956	836.837	841.669
185	Medium variant	Monaco		492	38.307	38.499	38.695	38.897	39.102	39.297	39.495	39.684	39.89	40.086	40.294	40.499	40.713	40.919	41.143	41.362	41.577	41.798	42.027	42.25	42.462	42.675	42.885	43.089	43.289	43.487	43.689	43.891	44.094	44.298	44.513	44.732	44.965	45.198	45.44	45.685	45.928	46.175	46.432	46.696	46.949	47.211	47.48	47.749	48.01
186	Medium variant	Netherlands		528	16938.5	16987.3	17035.9	17084.5	17132.9	17181.2	17229.5	17277.6	17324.9	17370.7	17414.4	17455.6	17494.5	17530.6	17563.9	17594.1	17621.1	17644.9	17665.1	17681.6	17694.1	17702.7	17707.5	17708.5	17706	17700.3	17691.3	17679.4	17664.8	17648.1	17629.6	17609.5	17588.1	17565.6	17542	17517.6	17492.5	17466.9	17441	17414.9	17388.8	17362.7	17336.8	17311.4	17286.6
187	Medium variant	Switzerland		756	8319.77	8401.74	8476	8544.03	8608.26	8670.53	8731.11	8789.51	8846.07	8901.02	8954.58	9007.02	9058.44	9108.62	9157.18	9203.91	9248.77	9291.93	9333.47	9373.49	9412.11	9449.36	9485.3	9520.09	9553.92	9586.94	9619.18	9650.66	9681.49	9711.75	9741.5	9770.81	9799.61	9827.62	9854.48	9879.9	9903.82	9926.33	9947.46	9967.27	9985.87	10003.3	10019.5	10034.8	10049.4
188	Medium variant	LATIN AMERICA AND THE CARIBBEAN		904	632381	639049	645593	652012	658306	664474	670511	676412	682175	687799	693282	698622	703817	708862	713752	718483	723054	727464	731713	735803	739736	743511	747128	750586	753886	757027	760011	762837	765505	768018	770374	772575	774621	776514	778253	779841	781279	782567	783704	784689	785523	786205	786738	787123	787362
189	Medium variant	Caribbean		915	43309.6	43601.8	43883.3	44155.3	44420.1	44679.4	44933.2	45180.6	45421.4	45655.2	45881.5	46100.2	46311.1	46513.3	46705.5	46887	47057.3	47216.4	47364.5	47501.9	47629	47745.8	47851.8	47947.4	48032.3	48106.6	48170.3	48223.5	48266	48297.4	48317.6	48326.8	48324.9	48312.5	48290.2	48258.2	48217.1	48166.8	48107.4	48039	47961.5	47875.5	47781.1	47678.5	47568.2
190	Medium variant	Anguilla		660	14.611	14.764	14.909	15.045	15.174	15.283	15.38	15.456	15.521	15.581	15.644	15.692	15.747	15.795	15.839	15.867	15.901	15.926	15.945	15.962	15.977	15.981	15.986	15.984	15.975	15.96	15.949	15.929	15.903	15.878	15.852	15.819	15.78	15.739	15.699	15.649	15.603	15.547	15.497	15.45	15.391	15.334	15.276	15.211	15.152
191	Medium variant	Antigua and Barbuda		28	99.923	100.963	102.012	103.05	104.084	105.11	106.125	107.144	108.138	109.126	110.094	111.043	111.971	112.877	113.763	114.608	115.442	116.242	117.008	117.744	118.452	119.131	119.77	120.377	120.955	121.503	122.01	122.482	122.922	123.334	123.729	124.079	124.404	124.701	124.973	125.223	125.451	125.652	125.832	125.997	126.147	126.275	126.392	126.504	126.595
192	Medium variant	Aruba		533	104.341	104.822	105.264	105.67	106.053	106.438	106.797	107.147	107.484	107.804	108.116	108.411	108.682	108.936	109.172	109.377	109.545	109.687	109.789	109.855	109.885	109.866	109.822	109.73	109.606	109.442	109.246	109.013	108.759	108.488	108.191	107.882	107.557	107.232	106.913	106.595	106.29	105.993	105.708	105.444	105.195	104.96	104.753	104.556	104.372
193	Medium variant	Bahamas		44	386.838	391.232	395.361	399.285	403.095	406.839	410.556	414.225	417.836	421.345	424.732	427.995	431.152	434.193	437.109	439.896	442.558	445.094	447.498	449.791	451.97	454.048	456.009	457.876	459.657	461.356	462.992	464.554	466.055	467.495	468.871	470.201	471.466	472.678	473.82	474.894	475.887	476.815	477.67	478.466	479.187	479.854	480.447	480.991	481.468
194	Medium variant	Barbados		52	284.217	284.996	285.719	286.388	287.01	287.568	288.071	288.529	288.928	289.261	289.538	289.757	289.908	290.004	290.04	290.01	289.938	289.791	289.599	289.355	289.05	288.698	288.296	287.854	287.367	286.843	286.293	285.708	285.095	284.46	283.799	283.124	282.438	281.733	281.024	280.31	279.604	278.886	278.176	277.482	276.792	276.122	275.451	274.789	274.155
195	Medium variant	British Virgin Islands		92	30.113	30.661	31.196	31.719	32.206	32.634	33.006	33.322	33.603	33.861	34.115	34.365	34.606	34.846	35.075	35.287	35.49	35.676	35.855	36.023	36.186	36.33	36.469	36.595	36.72	36.829	36.933	37.034	37.128	37.207	37.287	37.363	37.426	37.48	37.532	37.577	37.618	37.648	37.665	37.675	37.683	37.686	37.685	37.676	37.657
196	Medium variant	Caribbean Netherlands	22	535	24.57	25.019	25.398	25.702	25.971	26.212	26.433	26.631	26.827	27.004	27.175	27.342	27.51	27.669	27.825	27.972	28.114	28.244	28.378	28.494	28.618	28.732	28.836	28.938	29.033	29.124	29.22	29.306	29.382	29.468	29.539	29.609	29.684	29.751	29.821	29.886	29.935	29.997	30.055	30.107	30.152	30.203	30.248	30.287	30.333
197	Medium variant	Cayman Islands		136	59.963	60.765	61.559	62.348	63.129	63.89	64.643	65.393	66.135	66.872	67.599	68.311	69.014	69.703	70.384	71.059	71.713	72.355	72.987	73.607	74.215	74.804	75.373	75.939	76.48	77.006	77.51	78.009	78.491	78.956	79.401	79.842	80.27	80.689	81.097	81.488	81.875	82.25	82.617	82.988	83.351	83.716	84.083	84.456	84.83
198	Medium variant	Cuba		192	11461.4	11476	11484.6	11489.1	11492	11495.5	11499.7	11504	11508.1	11511.3	11513	11513.4	11512.4	11509.6	11504.2	11496	11484.6	11470.1	11452.8	11432.9	11410.7	11386.2	11359.4	11330.3	11299.2	11266.1	11231	11193.9	11154.9	11113.8	11070.6	11025.3	10978	10928.6	10877	10823.1	10767.1	10709.1	10649	10587.2	10523.8	10459	10392.8	10325.5	10257.1
199	Medium variant	Curaçao		531	158.01	159.371	160.539	161.577	162.547	163.495	164.458	165.43	166.4	167.343	168.236	169.085	169.908	170.701	171.45	172.17	172.856	173.508	174.127	174.723	175.28	175.81	176.306	176.788	177.246	177.673	178.091	178.491	178.878	179.246	179.611	179.961	180.312	180.653	180.977	181.289	181.595	181.89	182.18	182.459	182.733	183.003	183.27	183.526	183.789
200	Medium variant	Dominica		212	73.162	73.543	73.925	74.308	74.679	75.052	75.401	75.748	76.07	76.369	76.643	76.884	77.106	77.295	77.453	77.593	77.694	77.778	77.832	77.868	77.883	77.884	77.866	77.848	77.811	77.766	77.709	77.645	77.577	77.489	77.396	77.287	77.163	77.034	76.884	76.725	76.541	76.347	76.141	75.911	75.668	75.407	75.13	74.841	74.533
201	Medium variant	Dominican Republic		214	10528.4	10648.8	10767	10883	10996.8	11108.4	11217.7	11324.6	11429.3	11531.7	11632	11730.1	11826	11919.4	12010.3	12098.3	12183.5	12265.8	12345.3	12422.3	12496.9	12569.1	12638.8	12705.8	12769.9	12830.7	12888.4	12942.8	12994	13041.9	13086.8	13128.4	13166.9	13202.3	13234.9	13264.7	13292	13316.5	13338.5	13357.9	13374.8	13389.1	13401	13410.5	13417.6
202	Medium variant	Grenada		308	106.823	107.317	107.825	108.339	108.825	109.308	109.761	110.17	110.556	110.894	111.186	111.437	111.63	111.785	111.914	112.024	112.112	112.18	112.225	112.25	112.255	112.245	112.207	112.148	112.07	111.972	111.851	111.715	111.555	111.36	111.145	110.895	110.61	110.298	109.959	109.581	109.182	108.743	108.281	107.785	107.255	106.693	106.098	105.47	104.824
203	Medium variant	Guadeloupe	23	312	450.418	449.975	449.568	449.173	448.798	448.427	448.079	447.769	447.527	447.365	447.298	447.33	447.438	447.593	447.728	447.803	447.817	447.733	447.556	447.265	446.848	446.3	445.609	444.768	443.795	442.674	441.415	440.014	438.478	436.828	435.053	433.184	431.214	429.165	427.056	424.9	422.721	420.505	418.297	416.087	413.905	411.741	409.619	407.539	405.493
204	Medium variant	Haiti		332	10711.1	10847.3	10981.2	11112.9	11242.9	11371.2	11498	11623	11746.2	11867.2	11986	12102.5	12216.6	12328.2	12437.4	12544	12648	12749.3	12847.8	12943.5	13036.3	13126	13212.6	13296.1	13376.6	13454.1	13528.5	13599.7	13667.7	13732.1	13792.8	13849.6	13902.7	13952.2	13998.3	14041.1	14080.8	14117.2	14150.3	14179.8	14205.6	14227.7	14246.2	14261.1	14272.5
205	Medium variant	Jamaica		388	2871.93	2881.36	2890.3	2898.68	2906.34	2913.16	2919.13	2924.23	2928.45	2931.78	2934.22	2935.75	2936.34	2936	2934.76	2932.63	2929.62	2925.72	2920.88	2915.01	2908.06	2900.05	2890.99	2880.96	2870.06	2858.38	2845.95	2832.8	2818.92	2804.34	2789.06	2773.11	2756.53	2739.36	2721.7	2703.59	2685.06	2666.11	2646.72	2626.87	2606.52	2585.69	2564.4	2542.6	2520.29
206	Medium variant	Martinique		474	385.842	385.103	384.896	385.065	385.32	385.457	385.431	385.294	385.063	384.772	384.452	384.089	383.661	383.185	382.651	382.087	381.491	380.844	380.154	379.403	378.588	377.705	376.748	375.711	374.572	373.319	371.962	370.484	368.903	367.205	365.401	363.495	361.488	359.403	357.264	355.073	352.863	350.632	348.38	346.136	343.898	341.681	339.506	337.352	335.261
207	Medium variant	Montserrat		500	5.124	5.152	5.177	5.203	5.22	5.243	5.268	5.285	5.294	5.317	5.336	5.35	5.361	5.374	5.388	5.398	5.406	5.424	5.431	5.436	5.441	5.449	5.448	5.452	5.454	5.455	5.451	5.45	5.449	5.441	5.435	5.426	5.424	5.408	5.402	5.392	5.383	5.373	5.366	5.344	5.337	5.322	5.309	5.294	5.28
208	Medium variant	Puerto Rico		630	3673.73	3667.9	3663.13	3659.01	3654.98	3650.61	3645.72	3640.39	3634.75	3629.04	3623.42	3617.89	3612.3	3606.43	3599.98	3592.75	3584.65	3575.67	3565.86	3555.22	3543.78	3531.54	3518.47	3504.59	3489.9	3474.43	3458.2	3441.23	3423.53	3405.13	3386.04	3366.28	3345.9	3324.98	3303.62	3281.9	3259.88	3237.55	3214.94	3192.04	3168.82	3145.33	3121.59	3097.6	3073.36
209	Medium variant	Saint Kitts and Nevis		659	54.288	54.821	55.345	55.85	56.345	56.813	57.269	57.713	58.124	58.529	58.917	59.284	59.643	59.973	60.296	60.603	60.883	61.155	61.41	61.647	61.868	62.077	62.261	62.436	62.597	62.737	62.867	62.985	63.081	63.169	63.239	63.296	63.336	63.371	63.382	63.386	63.369	63.347	63.305	63.251	63.191	63.121	63.039	62.943	62.851
210	Medium variant	Saint Lucia		662	177.206	178.015	178.844	179.667	180.454	181.203	181.909	182.563	183.188	183.774	184.321	184.812	185.271	185.686	186.047	186.369	186.631	186.838	187.005	187.112	187.162	187.158	187.104	186.997	186.84	186.636	186.381	186.091	185.757	185.37	184.952	184.491	183.995	183.463	182.888	182.279	181.639	180.976	180.272	179.534	178.766	177.966	177.134	176.273	175.384
211	Medium variant	Saint Vincent and the Grenadines		670	109.455	109.643	109.897	110.2	110.488	110.757	110.986	111.184	111.348	111.506	111.643	111.773	111.877	111.974	112.049	112.106	112.163	112.187	112.208	112.216	112.219	112.207	112.19	112.16	112.099	112.012	111.884	111.725	111.53	111.303	111.053	110.774	110.474	110.139	109.784	109.406	109.012	108.602	108.164	107.712	107.24	106.755	106.251	105.74	105.204
212	Medium variant	Sint Maarten (Dutch part)		534	38.75	39.537	40.12	40.552	40.939	41.364	41.842	42.336	42.839	43.347	43.829	44.288	44.745	45.193	45.621	46.034	46.428	46.816	47.189	47.551	47.903	48.237	48.56	48.876	49.18	49.482	49.778	50.065	50.354	50.633	50.911	51.183	51.453	51.716	51.974	52.238	52.494	52.747	52.989	53.236	53.478	53.719	53.949	54.176	54.406
213	Medium variant	Trinidad and Tobago		780	1360.09	1364.96	1369.12	1372.6	1375.44	1377.73	1379.42	1380.53	1381.08	1381.16	1380.81	1380.05	1378.91	1377.44	1375.67	1373.66	1371.43	1369	1366.38	1363.59	1360.62	1357.5	1354.23	1350.8	1347.22	1343.47	1339.57	1335.49	1331.23	1326.76	1322.05	1317.12	1311.94	1306.54	1300.91	1295.07	1289.01	1282.74	1276.28	1269.64	1262.85	1255.92	1248.86	1241.68	1234.44
214	Medium variant	Turks and Caicos Islands		796	34.339	34.9	35.446	35.963	36.461	36.953	37.439	37.917	38.394	38.86	39.328	39.779	40.226	40.67	41.1	41.528	41.95	42.37	42.769	43.163	43.552	43.926	44.289	44.641	44.981	45.309	45.618	45.92	46.205	46.475	46.736	46.984	47.225	47.444	47.663	47.862	48.046	48.225	48.398	48.564	48.712	48.867	49.009	49.145	49.28
215	Medium variant	United States Virgin Islands		850	104.977	104.913	104.901	104.914	104.909	104.858	104.736	104.563	104.33	104.064	103.781	103.469	103.125	102.751	102.358	101.923	101.471	100.996	100.488	99.965	99.414	98.833	98.232	97.608	96.971	96.307	95.634	94.937	94.23	93.513	92.768	92.02	91.248	90.476	89.692	88.912	88.136	87.361	86.594	85.832	85.067	84.318	83.572	82.832	82.115
216	Medium variant	Central America		916	172635	174989	177316	179616	181887	184127	186335	188510	190648	192749	194812	196835	198816	200755	202649	204496	206297	208050	209756	211415	213029	214596	216117	217591	219019	220399	221733	223019	224258	225448	226590	227683	228726	229721	230667	231563	232410	233208	233955	234651	235294	235886	236424	236911	237346
217	Medium variant	Belize		84	359.288	366.954	374.681	382.444	390.231	398.007	405.765	413.509	421.21	428.847	436.398	443.865	451.221	458.472	465.64	472.702	479.672	486.544	493.312	499.968	506.511	512.945	519.274	525.489	531.605	537.621	543.534	549.358	555.077	560.702	566.238	571.685	577.033	582.273	587.415	592.42	597.316	602.081	606.717	611.225	615.599	619.85	623.962	627.937	631.773
218	Medium variant	Costa Rica		188	4807.85	4857.27	4905.77	4953.2	4999.38	5044.18	5087.54	5129.52	5170.11	5209.37	5247.34	5284.01	5319.37	5353.39	5386.06	5417.38	5447.33	5475.94	5503.21	5529.21	5553.95	5577.43	5599.67	5620.65	5640.39	5658.9	5676.16	5692.2	5706.98	5720.47	5732.64	5743.51	5753.07	5761.35	5768.35	5774.07	5778.54	5781.78	5783.79	5784.59	5784.18	5782.6	5779.86	5776.04	5771.2
219	Medium variant	El Salvador		222	6312.48	6344.72	6377.85	6411.56	6445.4	6479.07	6512.32	6545.17	6577.56	6609.53	6641.08	6672.17	6702.61	6732	6759.78	6785.58	6809.17	6830.67	6850.43	6869.03	6886.84	6904.01	6920.36	6935.63	6949.44	6961.52	6971.81	6980.4	6987.38	6992.86	6996.96	6999.69	7001.02	7001.03	6999.81	6997.41	6993.87	6989.18	6983.3	6976.18	6967.76	6958.06	6947.07	6934.77	6921.09
220	Medium variant	Guatemala		320	16252.4	16582.5	16913.5	17245.3	17577.8	17910.8	18244	18577.1	18909.7	19241.6	19572.5	19902.1	20230.2	20556.5	20880.8	21202.7	21522.2	21839	22152.9	22464.1	22772.2	23077.4	23379.2	23677.8	23972.9	24264.5	24552.4	24836.5	25116.9	25393.5	25666.2	25935	26199.7	26460.3	26716.5	26968.3	27215.5	27458	27695.7	27928.5	28156.4	28379.3	28596.9	28809	29015.4
221	Medium variant	Honduras		340	8960.83	9112.87	9265.07	9417.17	9568.69	9719.26	9868.82	10017.3	10164.6	10310.5	10454.8	10597.4	10738.1	10876.8	11013.3	11147.4	11278.9	11408	11534.3	11657.9	11778.7	11896.5	12011.5	12123.5	12232.8	12339.4	12443.3	12544.5	12642.9	12738.4	12831	12920.5	13007	13090.5	13171.1	13248.7	13323.3	13394.9	13463.5	13529	13591.4	13650.6	13706.7	13759.6	13809.4
222	Medium variant	Mexico		484	125891	127540	129163	130759	132328	133870	135384	136869	138323	139744	141132	142484	143801	145083	146329	147540	148716	149856	150960	152028	153061	154058	155019	155944	156834	157690	158510	159295	160045	160759	161436	162078	162683	163251	163783	164279	164739	165162	165548	165897	166206	166477	166710	166904	167062
223	Medium variant	Nicaragua		558	6082.03	6149.93	6217.58	6284.76	6351.16	6416.57	6480.81	6543.98	6606.54	6669.15	6732.2	6795.86	6859.84	6923.48	6985.85	7046.29	7104.55	7160.71	7214.92	7267.43	7318.4	7367.83	7415.58	7461.64	7505.97	7548.56	7589.4	7628.48	7665.78	7701.26	7734.9	7766.7	7796.66	7824.78	7851.13	7875.74	7898.59	7919.68	7938.97	7956.43	7972.05	7985.79	7997.67	8007.65	8015.73
224	Medium variant	Panama		591	3969.25	4034.12	4098.59	4162.62	4226.2	4289.33	4351.94	4413.97	4475.36	4536.07	4596.07	4655.33	4713.81	4771.49	4828.33	4884.31	4939.39	4993.58	5046.92	5099.49	5151.31	5202.42	5252.78	5302.36	5351.14	5399.08	5446.19	5492.42	5537.76	5582.14	5625.56	5667.96	5709.37	5749.71	5788.96	5827.11	5864.13	5900.02	5934.78	5968.4	6000.88	6032.24	6062.47	6091.6	6119.67
225	Medium variant	South America		931	416436	420458	424394	428241	431998	435667	439242	442722	446106	449394	452588	455688	458690	461594	464398	467100	469700	472197	474593	476886	479078	481169	483159	485047	486835	488521	490107	491594	492982	494273	495467	496566	497570	498480	499296	500020	500652	501192	501641	501999	502267	502444	502533	502534	502448
226	Medium variant	Argentina		32	43417.8	43847.4	44271	44688.9	45101.8	45510.4	45914.4	46313.3	46707	47095.8	47479.8	47858.9	48232.9	48601.8	48965.3	49323.3	49675.6	50022.3	50363.2	50698.4	51027.8	51351.4	51669	51980.6	52286.2	52585.6	52878.8	53165.7	53446.3	53720.6	53988.6	54250.1	54505.2	54753.5	54994.8	55228.9	55455.7	55675	55886.6	56090.5	56286.3	56474.1	56653.7	56825	56987.9
227	Medium variant	Bolivia (Plurinational State of)		68	10724.7	10887.9	11051.6	11215.7	11379.9	11544	11707.9	11871.5	12034.8	12197.6	12359.8	12521.3	12682	12841.7	13000.4	13158.1	13314.5	13469.6	13623.3	13775.1	13925.1	14073.1	14218.9	14362.6	14504.1	14643.3	14780.3	14914.9	15047.2	15177	15304.4	15429.3	15551.7	15671.6	15788.9	15903.5	16015.4	16124.6	16231	16334.6	16435.4	16533.3	16628.2	16720.2	16809
228	Medium variant	Brazil		76	205962	207653	209288	210868	212393	213863	215278	216636	217937	219182	220371	221503	222579	223599	224563	225472	226327	227127	227873	228564	229203	229787	230320	230799	231226	231602	231925	232198	232420	232596	232724	232807	232845	232838	232785	232688	232546	232361	232131	231856	231538	231175	230768	230318	229827
229	Medium variant	Chile		152	17762.7	17909.8	18054.7	18197.2	18336.7	18472.6	18604.9	18733.6	18858.8	18980.6	19099.2	19214.7	19326.7	19434.9	19538.6	19637.3	19731	19819.6	19903.5	19983.2	20059	20130.8	20198.8	20262.7	20322.7	20378.6	20430.5	20478.4	20522.3	20562.2	20598.1	20629.9	20657.7	20681.6	20701.8	20718.1	20730.8	20740	20745.6	20747.9	20746.9	20742.8	20735.6	20725.4	20712.5
230	Medium variant	Colombia		170	48228.7	48653.4	49065.6	49464.7	49849.8	50220.4	50576.2	50917.3	51243.8	51556.1	51854.5	52138.8	52409.1	52665.1	52906.8	53134.1	53347.1	53545.7	53729.9	53899.5	54054.6	54195.1	54321.3	54433.2	54531	54615.1	54685.6	54742.6	54786.3	54816.6	54833.8	54837.9	54829.3	54808.6	54776.2	54732.8	54678.5	54613.8	54539.1	54454.7	54361	54258.4	54147.3	54027.8	53900.5
231	Medium variant	Ecuador		218	16144.4	16385.1	16624.9	16863.4	17100.4	17335.6	17568.8	17799.8	18028.4	18254.7	18478.4	18699.4	18917.6	19132.9	19345.4	19554.9	19761.3	19964.7	20164.7	20361.2	20554.2	20743.4	20928.8	21110.4	21288	21461.7	21631.4	21797	21958.5	22115.7	22268.7	22417.3	22561.6	22701.5	22837.1	22968.5	23095.5	23218.3	23336.7	23450.7	23560.3	23665.5	23766.3	23862.7	23954.5
232	Medium variant	Falkland Islands (Malvinas)		238	2.898	2.91	2.91	2.922	2.921	2.925	2.926	2.928	2.929	2.934	2.932	2.933	2.934	2.931	2.927	2.925	2.921	2.921	2.915	2.911	2.905	2.904	2.898	2.892	2.89	2.888	2.884	2.876	2.871	2.869	2.862	2.86	2.855	2.849	2.847	2.839	2.834	2.83	2.823	2.815	2.811	2.802	2.798	2.793	2.787
233	Medium variant	French Guiana		254	268.691	275.713	282.731	289.763	296.847	303.982	311.201	318.472	325.814	333.234	340.733	348.323	355.988	363.74	371.567	379.463	387.423	395.445	403.53	411.65	419.826	428.02	436.246	444.482	452.729	460.974	469.201	477.421	485.621	493.795	501.94	510.055	518.142	526.196	534.205	542.161	550.082	557.946	565.773	573.557	581.32	589.05	596.745	604.412	612.063
234	Medium variant	Guyana		328	768.514	773.303	777.859	782.225	786.508	790.782	795.022	799.146	803.119	806.914	810.501	813.861	816.988	819.881	822.554	824.982	827.197	829.166	830.889	832.333	833.489	834.352	834.928	835.233	835.288	835.119	834.73	834.125	833.307	832.264	831.011	829.552	827.883	826.057	824.047	821.906	819.622	817.215	814.676	811.998	809.183	806.227	803.14	799.917	796.576
235	Medium variant	Paraguay		600	6639.12	6725.31	6811.3	6896.91	6981.98	7066.33	7149.85	7232.42	7313.91	7394.17	7473.08	7550.53	7626.46	7700.84	7773.66	7844.9	7914.54	7982.51	8048.73	8113.14	8175.69	8236.34	8295.09	8351.98	8407.03	8460.3	8511.78	8561.49	8609.42	8655.63	8700.13	8742.91	8783.99	8823.38	8861.11	8897.18	8931.6	8964.34	8995.36	9024.62	9052.05	9077.66	9101.4	9123.23	9143.07
236	Medium variant	Peru		604	31376.7	31773.8	32165.5	32551.8	32933.8	33312.2	33686.3	34055.3	34419	34777.5	35130.7	35478.6	35820.7	36156.6	36485.4	36806.8	37120.4	37426.2	37724.4	38015.2	38298.8	38575.2	38844.2	39105.7	39359.7	39606.1	39844.8	40075.8	40298.7	40513.4	40719.5	40917.1	41106	41286.3	41457.7	41620.3	41774.1	41919	42055.2	42182.7	42301.8	42412.5	42514.8	42608.8	42694.5
237	Medium variant	Suriname		740	553.208	558.368	563.402	568.301	573.085	577.752	582.296	586.707	590.977	595.108	599.095	602.926	606.611	610.141	613.514	616.728	619.782	622.677	625.407	627.981	630.385	632.633	634.711	636.632	638.402	640.018	641.482	642.806	643.99	645.016	645.908	646.655	647.273	647.753	648.129	648.399	648.567	648.641	648.623	648.52	648.327	648.041	647.674	647.229	646.701
238	Medium variant	Uruguay		858	3431.55	3444.01	3456.75	3469.55	3482.16	3494.39	3506.14	3517.42	3528.27	3538.76	3548.94	3558.8	3568.29	3577.38	3586.06	3594.3	3602.07	3609.41	3616.27	3622.65	3628.56	3633.99	3638.94	3643.41	3647.41	3650.96	3654.06	3656.72	3658.93	3660.71	3662.04	3662.93	3663.42	3663.48	3663.15	3662.44	3661.35	3659.88	3658.05	3655.81	3653.2	3650.2	3646.8	3643.02	3638.86
239	Medium variant	Venezuela (Bolivarian Republic of)		862	31155.1	31568.2	31977.1	32381.2	32779.9	33172.4	33558.5	33938.1	34311.5	34678.8	35040.2	35395.7	35744.9	36087.4	36422.6	36749.9	37069.2	37380.3	37683.4	37978.5	38265.6	38544.6	38815.4	39078.1	39332.5	39578.8	39816.8	40046.6	40268.1	40481.2	40685.8	40882	41069.8	41249.5	41421.1	41585	41741.2	41889.8	42030.8	42164.3	42290.4	42409.1	42520.6	42625	42722.4
240	Medium variant	NORTHERN AMERICA		905	356004	358594	361208	363844	366497	369159	371831	374516	377205	379887	382553	385199	387822	390413	392959	395453	397889	400267	402585	404844	407044	409186	411270	413297	415270	417193	419068	420897	422687	424449	426188	427909	429614	431306	432986	434655	436315	437969	439621	441275	442935	444600	446271	447947	449624
241	Medium variant	Bermuda		60	62.003	61.666	61.349	61.07	60.833	60.639	60.472	60.354	60.256	60.154	60.045	59.915	59.778	59.621	59.451	59.273	59.084	58.89	58.686	58.451	58.225	57.974	57.718	57.447	57.158	56.866	56.556	56.221	55.895	55.546	55.196	54.843	54.479	54.117	53.74	53.378	53.013	52.655	52.309	51.968	51.633	51.316	51.002	50.702	50.406
242	Medium variant	Canada		124	35949.7	36289.8	36624.2	36953.8	37279.8	37603.2	37924.2	38242.2	38556.9	38867.3	39172.9	39473.5	39769	40058.7	40341.7	40617.5	40885.8	41146.8	41400.6	41647.7	41888.4	42122.8	42351.2	42574	42791.7	43004.7	43213.3	43417.7	43618.5	43816.2	44011.3	44204.3	44395	44583.1	44767.8	44948.6	45125.4	45298.7	45469.1	45637.5	45804.7	45970.9	46136.1	46300.7	46464.9
243	Medium variant	Greenland		304	56.377	56.412	56.48	56.565	56.673	56.772	56.883	56.994	57.09	57.171	57.242	57.283	57.301	57.297	57.275	57.228	57.171	57.093	56.995	56.887	56.761	56.617	56.471	56.302	56.137	55.942	55.745	55.55	55.343	55.126	54.915	54.691	54.468	54.247	54.027	53.801	53.597	53.387	53.173	52.971	52.77	52.577	52.386	52.202	52.017
244	Medium variant	Saint Pierre and Miquelon		666	6.29	6.305	6.32	6.342	6.375	6.407	6.454	6.504	6.553	6.609	6.658	6.708	6.755	6.794	6.842	6.879	6.921	6.958	6.996	7.038	7.068	7.105	7.133	7.163	7.191	7.216	7.234	7.258	7.283	7.295	7.315	7.323	7.338	7.352	7.367	7.379	7.384	7.395	7.4	7.406	7.419	7.421	7.421	7.427	7.425
245	Medium variant	United States of America		840	319929	322180	324459	326767	329093	331432	333783	336150	338524	340895	343256	345602	347930	350230	352494	354712	356880	358997	361062	363074	365034	366942	368797	370602	372358	374069	375735	377360	378950	380514	382059	383588	385103	386607	388103	389592	391076	392557	394039	395526	397018	398518	400024	401536	403049
246	Medium variant	OCEANIA		909	39543	40117.4	40690.8	41261.2	41826.2	42383.8	42933.4	43475.8	44012.4	44545	45075.3	45603.5	46129.1	46651.6	47169.9	47683.2	48191.5	48695	49193.9	49688.5	50178.8	50665.1	51147.1	51625.5	52100.4	52572.3	53041.2	53506.9	53969.6	54429.6	54886.7	55341.1	55792.6	56240.3	56683.5	57121.5	57553.8	57980.6	58402	58817.9	59228.5	59633.7	60033.4	60427.6	60816.4
247	Medium variant	Australia/New Zealand		927	28414.1	28786.7	29156.4	29521.8	29881	30232.6	30576.1	30912.2	31242	31567.3	31889.4	32208.5	32524.6	32837	33144.9	33447.8	33745.8	34039.2	34328.5	34614	34896.2	35175.4	35451.5	35725.2	35996.8	36266.8	36535.2	36802.2	37067.9	37332.8	37596.9	37860.5	38123.2	38384.4	38643	38898.3	39150	39398.2	39642.9	39884.4	40122.8	40358.1	40590.2	40819.2	41045.1
248	Medium variant	Australia	24	36	23799.6	24125.8	24450.6	24772.2	25088.6	25398.2	25700.5	25996.3	26286.7	26573.2	26857.1	27138.6	27417.6	27693.7	27966.2	28234.7	28499.4	28760.4	29018.3	29273.5	29526.4	29777.3	30026.1	30273.4	30519.4	30764.6	31009.1	31252.8	31496.1	31739.1	31982.1	32225	32467.8	32709.7	32949.6	33186.8	33421.1	33652.4	33880.9	34106.7	34329.8	34550.3	34768	34982.9	35195.1
249	Medium variant	New Zealand		554	4614.53	4660.83	4705.82	4749.6	4792.41	4834.42	4875.6	4915.87	4955.33	4994.12	5032.31	5069.94	5106.97	5143.28	5178.7	5213.1	5246.46	5278.81	5310.14	5340.46	5369.78	5398.1	5425.45	5451.87	5477.42	5502.17	5526.16	5549.38	5571.88	5593.7	5614.86	5635.42	5655.38	5674.72	5693.43	5711.48	5728.91	5745.75	5762.02	5777.78	5793.04	5807.85	5822.22	5836.24	5849.98
250	Medium variant	Melanesia		928	9933.15	10126.2	10320.5	10515.8	10711.9	10908.7	11106.1	11304.1	11502.7	11701.8	11901.5	12101.6	12302.1	12502.8	12703.8	12904.8	13105.8	13306.7	13507.3	13707.5	13906.9	14105.7	14303.5	14500.4	14696.2	14890.9	15084.4	15276.6	15467.4	15656.6	15844.1	16029.8	16213.6	16395.7	16575.9	16754.5	16931.2	17106.2	17279.2	17450.2	17619.1	17785.8	17950.4	18112.6	18272.6
251	Medium variant	Fiji		242	892.149	898.76	905.502	912.241	918.757	924.915	930.655	936.021	941.061	945.843	950.43	954.819	958.985	962.953	966.711	970.27	973.64	976.826	979.803	982.586	985.15	987.513	989.652	991.583	993.298	994.801	996.089	997.158	998.019	998.661	999.087	999.293	999.277	999.088	998.711	998.19	997.526	996.715	995.77	994.678	993.452	992.073	990.562	988.922	987.158
252	Medium variant	New Caledonia		540	269.091	272.677	276.255	279.821	283.376	286.913	290.425	293.928	297.409	300.865	304.312	307.727	311.115	314.478	317.814	321.102	324.366	327.579	330.757	333.882	336.977	340.013	342.997	345.934	348.824	351.664	354.449	357.188	359.877	362.528	365.137	367.695	370.22	372.7	375.126	377.509	379.828	382.1	384.325	386.5	388.629	390.713	392.754	394.753	396.704
253	Medium variant	Papua New Guinea		598	7919.82	8084.99	8251.16	8418.35	8586.52	8755.67	8925.77	9096.76	9268.59	9441.13	9614.31	9788.05	9962.26	10136.9	10311.8	10486.9	10662.1	10837.4	11012.5	11187.3	11361.7	11535.6	11708.9	11881.4	12053.3	12224.3	12394.5	12563.7	12731.8	12898.7	13064.3	13228.6	13391.4	13552.8	13712.8	13871.4	14028.6	14184.3	14338.4	14490.8	14641.5	14790.4	14937.5	15082.6	15225.8
254	Medium variant	Solomon Islands		90	587.482	599.419	611.343	623.281	635.254	647.297	659.413	671.59	683.861	696.22	708.678	721.249	733.918	746.7	759.576	772.545	785.61	798.763	811.975	825.243	838.538	851.855	865.184	878.507	891.808	905.073	918.279	931.433	944.506	957.477	970.329	983.052	995.652	1008.12	1020.5	1032.78	1044.96	1057.05	1069.05	1080.93	1092.68	1104.33	1115.86	1127.28	1138.61
255	Medium variant	Vanuatu		548	264.603	270.402	276.244	282.117	288.017	293.934	299.872	305.825	311.787	317.773	323.766	329.78	335.8	341.846	347.903	353.974	360.069	366.172	372.295	378.412	384.535	390.661	396.776	402.885	408.991	415.081	421.158	427.209	433.249	439.249	445.242	451.187	457.099	462.97	468.811	474.593	480.342	486.028	491.667	497.255	502.792	508.272	513.7	519.07	524.373
256	Medium variant	Micronesia		954	518.995	523.167	527.53	531.996	536.579	541.207	545.832	550.456	555.093	559.774	564.53	569.352	574.226	579.088	583.892	588.6	593.19	597.665	602.012	606.24	610.357	614.336	618.187	621.913	625.509	628.978	632.305	635.488	638.534	641.472	644.227	646.855	649.343	651.717	653.983	656.179	658.276	660.314	662.283	664.18	666.041	667.832	669.559	671.273	672.918
257	Medium variant	Guam		316	161.797	162.896	164.229	165.718	167.245	168.727	170.126	171.464	172.748	174.005	175.243	176.463	177.654	178.812	179.928	181.009	182.039	183.023	183.961	184.854	185.696	186.487	187.224	187.916	188.561	189.156	189.701	190.193	190.64	191.042	191.41	191.729	192.003	192.245	192.456	192.647	192.807	192.949	193.075	193.173	193.255	193.314	193.35	193.376	193.38
258	Medium variant	Kiribati		296	112.407	114.395	116.398	118.414	120.428	122.439	124.433	126.413	128.388	130.343	132.27	134.18	136.058	137.909	139.739	141.538	143.329	145.085	146.832	148.583	150.34	152.099	153.872	155.662	157.46	159.295	161.147	163.017	164.902	166.808	168.697	170.593	172.479	174.36	176.23	178.085	179.925	181.748	183.533	185.309	187.05	188.761	190.432	192.089	193.703
259	Medium variant	Marshall Islands		584	52.994	53.066	53.127	53.167	53.211	53.251	53.289	53.327	53.4	53.514	53.702	53.956	54.299	54.695	55.143	55.634	56.159	56.726	57.321	57.943	58.586	59.239	59.915	60.576	61.232	61.858	62.454	63.028	63.547	64.033	64.457	64.825	65.154	65.424	65.659	65.868	66.033	66.183	66.311	66.437	66.575	66.718	66.873	67.058	67.264
260	Medium variant	Micronesia (Fed. States of)		583	104.433	104.937	105.544	106.227	106.983	107.774	108.609	109.471	110.367	111.301	112.283	113.299	114.349	115.404	116.441	117.43	118.363	119.242	120.075	120.849	121.579	122.253	122.874	123.455	123.993	124.494	124.958	125.391	125.798	126.179	126.546	126.894	127.234	127.559	127.878	128.193	128.51	128.821	129.129	129.419	129.688	129.932	130.151	130.333	130.489
261	Medium variant	Nauru		520	11.26	11.347	11.359	11.312	11.26	11.227	11.222	11.232	11.261	11.291	11.326	11.351	11.381	11.407	11.429	11.454	11.473	11.494	11.507	11.519	11.527	11.531	11.532	11.532	11.527	11.522	11.518	11.507	11.491	11.481	11.461	11.441	11.415	11.397	11.363	11.337	11.307	11.272	11.244	11.207	11.176	11.138	11.1	11.062	11.024
262	Medium variant	Northern Mariana Islands		580	54.816	55.023	55.144	55.194	55.246	55.347	55.471	55.622	55.765	55.913	56.071	56.236	56.38	56.535	56.664	56.775	56.863	56.924	56.954	56.951	56.914	56.846	56.737	56.588	56.407	56.19	55.939	55.642	55.324	54.981	54.599	54.201	53.784	53.354	52.916	52.469	52.015	51.556	51.114	50.664	50.233	49.812	49.401	49.019	48.639
263	Medium variant	Palau		585	21.288	21.503	21.729	21.964	22.206	22.442	22.682	22.927	23.164	23.407	23.635	23.867	24.105	24.326	24.548	24.76	24.964	25.171	25.362	25.541	25.715	25.881	26.033	26.184	26.329	26.463	26.588	26.71	26.832	26.948	27.057	27.172	27.274	27.378	27.481	27.58	27.679	27.785	27.877	27.971	28.064	28.157	28.252	28.336	28.419
264	Medium variant	Polynesia	25	957	676.747	681.335	686.371	691.565	696.623	701.251	705.35	709.069	712.557	716.084	719.869	723.942	728.233	732.714	737.305	741.957	746.659	751.388	756.133	760.779	765.314	769.705	773.928	777.994	781.879	785.618	789.183	792.546	795.723	798.707	801.449	804.034	806.397	808.567	810.594	812.502	814.298	815.983	817.583	819.091	820.56	821.933	823.264	824.525	825.774
265	Medium variant	American Samoa		16	55.537	55.599	55.641	55.679	55.727	55.799	55.899	56.015	56.132	56.266	56.402	56.548	56.69	56.837	56.989	57.147	57.306	57.464	57.622	57.752	57.856	57.925	57.974	57.987	57.978	57.948	57.901	57.832	57.748	57.65	57.526	57.396	57.247	57.094	56.927	56.759	56.591	56.424	56.246	56.068	55.889	55.701	55.519	55.324	55.134
266	Medium variant	Cook Islands		184	17.449	17.379	17.38	17.411	17.462	17.515	17.55	17.589	17.63	17.667	17.707	17.745	17.781	17.803	17.838	17.861	17.884	17.903	17.912	17.931	17.934	17.944	17.938	17.945	17.941	17.949	17.952	17.953	17.959	17.956	17.955	17.955	17.951	17.94	17.939	17.945	17.939	17.94	17.946	17.946	17.948	17.938	17.926	17.9	17.881
267	Medium variant	French Polynesia		258	277.69	280.208	283.007	285.859	288.506	290.744	292.488	293.834	294.95	296.101	297.475	299.127	300.983	302.959	304.927	306.76	308.445	310.025	311.503	312.896	314.233	315.498	316.697	317.816	318.861	319.836	320.739	321.569	322.323	323.008	323.632	324.183	324.659	325.075	325.434	325.713	325.933	326.095	326.196	326.239	326.227	326.169	326.059	325.894	325.693
268	Medium variant	Niue		570	1.629	1.624	1.618	1.624	1.628	1.632	1.626	1.634	1.635	1.637	1.637	1.641	1.647	1.659	1.664	1.674	1.682	1.688	1.696	1.701	1.708	1.716	1.725	1.732	1.733	1.738	1.749	1.755	1.757	1.762	1.759	1.768	1.774	1.776	1.784	1.786	1.791	1.793	1.794	1.799	1.805	1.811	1.813	1.817	1.821
269	Medium variant	Samoa		882	193.759	195.125	196.44	197.695	198.909	200.117	201.318	202.508	203.702	204.864	206.018	207.133	208.243	209.403	210.66	212.095	213.698	215.459	217.327	219.221	221.098	222.937	224.746	226.512	228.24	229.926	231.575	233.17	234.694	236.152	237.53	238.83	240.055	241.21	242.305	243.371	244.394	245.383	246.349	247.298	248.234	249.16	250.084	251.017	251.955
270	Medium variant	Tokelau		772	1.252	1.282	1.3	1.319	1.34	1.357	1.373	1.377	1.384	1.393	1.4	1.412	1.425	1.434	1.44	1.444	1.458	1.463	1.468	1.47	1.476	1.482	1.484	1.495	1.5	1.502	1.508	1.51	1.519	1.524	1.534	1.54	1.547	1.555	1.555	1.562	1.566	1.569	1.572	1.58	1.583	1.589	1.593	1.591	1.595
271	Medium variant	Tonga		776	106.364	107.122	108.02	109.008	110.041	111.037	111.993	112.933	113.867	114.81	115.793	116.806	117.838	118.902	119.967	121.055	122.155	123.261	124.378	125.489	126.596	127.696	128.778	129.848	130.889	131.906	132.874	133.812	134.714	135.575	136.387	137.164	137.901	138.595	139.268	139.926	140.567	141.193	141.825	142.441	143.068	143.692	144.319	144.955	145.594
272	Medium variant	Tuvalu		798	11.001	11.097	11.192	11.287	11.393	11.499	11.609	11.722	11.842	11.962	12.084	12.207	12.334	12.448	12.576	12.699	12.82	12.937	13.053	13.159	13.264	13.371	13.466	13.563	13.652	13.742	13.834	13.917	14	14.084	14.158	14.246	14.329	14.413	14.496	14.58	14.674	14.768	14.853	14.949	15.051	15.139	15.231	15.332	15.428
273	Medium variant	Wallis and Futuna Islands		876	12.066	11.899	11.773	11.683	11.617	11.551	11.494	11.457	11.415	11.384	11.353	11.323	11.292	11.269	11.244	11.222	11.211	11.188	11.174	11.16	11.149	11.136	11.12	11.096	11.085	11.071	11.051	11.028	11.009	10.996	10.968	10.952	10.934	10.909	10.886	10.86	10.843	10.818	10.802	10.771	10.755	10.734	10.72	10.695	10.673
[truncated: 41 more columns]

## Sheet: HIGH VARIANT
United Nations
Population Division
Department of Economic and Social Affairs
World Population Prospects: The 2017 Revision
File POP/1-1: Total population (both sexes combined) by region, subregion and country, annually for 1950-2100 (thousands)
High fertility variant, 2015 - 2100
POP/DB/WPP/Rev.2017/POP/F01-1
June 2017 - Copyright © 2017 by United Nations. All rights reserved
Suggested citation: United Nations, Department of Economic and Social Affairs, Population Division (2017). World Population Prospects: The 2017 Revision, DVD Edition.
					Total population, both sexes combined, as of 1 July (thousands)
Index	Variant	Region, subregion, country or area *	Notes	Country code	2015	2016	2017	2018	2019	2020	2021	2022	2023	2024	2025	2026	2027	2028	2029	2030	2031	2032	2033	2034	2035	2036	2037	2038	2039	2040	2041	2042	2043	2044	2045	2046	2047	2048	2049	2050	2051	2052	2053	2054	2055	2056	2057	2058	2059
1	High variant	WORLD		900	7.38301e+06	7.47605e+06	7.57126e+06	7.66809e+06	7.76612e+06	7.86502e+06	7.96455e+06	8.06458e+06	8.16508e+06	8.26607e+06	8.36755e+06	8.46946e+06	8.57161e+06	8.67361e+06	8.77499e+06	8.87543e+06	8.97479e+06	9.07316e+06	9.1707e+06	9.26773e+06	9.36449e+06	9.46103e+06	9.55738e+06	9.65371e+06	9.75024e+06	9.84713e+06	9.94447e+06	1.00423e+07	1.01407e+07	1.02398e+07	1.03396e+07	1.04401e+07	1.05414e+07	1.06433e+07	1.07459e+07	1.08491e+07	1.09529e+07	1.10571e+07	1.11618e+07	1.12668e+07	1.1372e+07	1.14773e+07	1.15827e+07	1.16882e+07	1.17938e+07
2	High variant	More developed regions	a	901	1.25321e+06	1.25808e+06	1.2632e+06	1.26849e+06	1.27389e+06	1.27935e+06	1.28483e+06	1.29033e+06	1.29585e+06	1.30139e+06	1.30697e+06	1.31257e+06	1.31818e+06	1.32373e+06	1.32914e+06	1.33436e+06	1.33937e+06	1.34419e+06	1.34885e+06	1.35339e+06	1.35785e+06	1.36224e+06	1.36658e+06	1.37089e+06	1.37519e+06	1.37952e+06	1.38388e+06	1.3883e+06	1.3928e+06	1.39743e+06	1.40221e+06	1.40716e+06	1.41228e+06	1.41757e+06	1.42305e+06	1.42869e+06	1.43452e+06	1.44052e+06	1.44669e+06	1.45299e+06	1.45942e+06	1.46596e+06	1.47261e+06	1.47936e+06	1.48617e+06
3	High variant	Less developed regions	b	902	6.1298e+06	6.21797e+06	6.30806e+06	6.3996e+06	6.49223e+06	6585672	6.67972e+06	6.77425e+06	6.86924e+06	6.96468e+06	7.06058e+06	7.15689e+06	7.25343e+06	7.34988e+06	7.44585e+06	7.54107e+06	7.63542e+06	7.72896e+06	7.82185e+06	7.91435e+06	8.00664e+06	8.09879e+06	8.1908e+06	8.28282e+06	8.37505e+06	8.46761e+06	8.56059e+06	8.65401e+06	8.74793e+06	8.84238e+06	8.93737e+06	9.03294e+06	9.12908e+06	9.22575e+06	9.32288e+06	9.42041e+06	9.51834e+06	9.61662e+06	9.71516e+06	9.81384e+06	9.91258e+06	1.00113e+07	1.01101e+07	1.02088e+07	1.03076e+07
4	High variant	Least developed countries	c	941	956631	980373	1.00499e+06	1.0304e+06	1.05655e+06	1.08336e+06	1.11082e+06	1.13889e+06	1.16758e+06	1.19688e+06	1.2268e+06	1.25731e+06	1.2884e+06	1.31998e+06	1.35198e+06	1.38435e+06	1.41704e+06	1.45008e+06	1.48348e+06	1.51728e+06	1.5515e+06	1.58615e+06	1.62123e+06	1.65675e+06	1.69272e+06	1.72917e+06	1.76611e+06	1.80352e+06	1.84141e+06	1.8798e+06	1.91866e+06	1.958e+06	1.99783e+06	2.03812e+06	2.07888e+06	2.12009e+06	2.16175e+06	2.20384e+06	2.24635e+06	2.28925e+06	2.33251e+06	2.37612e+06	2.42006e+06	2.46434e+06	2.50893e+06
5	High variant	Less developed regions, excluding least developed countries	d	934	5.17317e+06	5.2376e+06	5.30306e+06	5.36919e+06	5.43569e+06	5.50231e+06	5.5689e+06	5.63536e+06	5.70166e+06	5.7678e+06	5.83378e+06	5.89957e+06	5.96503e+06	6.0299e+06	6.09387e+06	6.15672e+06	6.21837e+06	6.27888e+06	6.33837e+06	6.39707e+06	6.45514e+06	6.51263e+06	6.56957e+06	6.62608e+06	6.68232e+06	6.73844e+06	6.79448e+06	6.85049e+06	6.90652e+06	6.96258e+06	7.01871e+06	7.07494e+06	7.13125e+06	7.18763e+06	7.244e+06	7.30032e+06	7.35659e+06	7.41277e+06	7.46881e+06	7.5246e+06	7.58007e+06	7.63521e+06	7.69002e+06	7.7445e+06	7.79866e+06
6	High variant	Less developed regions, excluding China		948	4.70144e+06	4.78101e+06	4.86265e+06	4.94596e+06	5.03064e+06	5.11644e+06	5.20319e+06	5.2908e+06	5.37922e+06	5.46845e+06	5.5585e+06	5.64931e+06	5.74072e+06	5.83246e+06	5.92418e+06	6.01563e+06	6.1067e+06	6.19744e+06	6.28796e+06	6.37845e+06	6.46907e+06	6.55983e+06	6.65075e+06	6.74193e+06	6.8335e+06	6.92558e+06	7.01821e+06	7.11141e+06	7.20522e+06	7.29966e+06	7.39473e+06	7.49046e+06	7.58682e+06	7.68378e+06	7.78129e+06	7.87928e+06	7.97774e+06	8.07663e+06	8.17585e+06	8.27528e+06	8.37484e+06	8.47447e+06	8.57416e+06	8.67387e+06	8.7736e+06
7	High variant	High-income countries	e	1503	1.18006e+06	1.18732e+06	1.19473e+06	1.20224e+06	1.20978e+06	1.21733e+06	1.22486e+06	1.23239e+06	1.23992e+06	1.24749e+06	1.25511e+06	1.26279e+06	1.27049e+06	1.27815e+06	1.28566e+06	1.29296e+06	1.30001e+06	1.30684e+06	1.31346e+06	1.31989e+06	1.32617e+06	1.3323e+06	1.33828e+06	1.34415e+06	1.34992e+06	1.35562e+06	1.36127e+06	1.36688e+06	1.3725e+06	1.37817e+06	1.38392e+06	1.38978e+06	1.39574e+06	1.40182e+06	1.40804e+06	1.4144e+06	1.42091e+06	1.42756e+06	1.43435e+06	1.44127e+06	1.4483e+06	1.45543e+06	1.46267e+06	1.46999e+06	1.47738e+06
8	High variant	Middle-income countries	e	1517	5.55826e+06	5.6259e+06	5.69492e+06	5.76489e+06	5.83548e+06	5.90642e+06	5.97749e+06	6.04857e+06	6.1196e+06	6.19056e+06	6.26143e+06	6.33215e+06	6.40256e+06	6.4724e+06	6.54138e+06	6.60926e+06	6.67595e+06	6.74152e+06	6.80612e+06	6.87e+06	6.93336e+06	6.99624e+06	7.05868e+06	7.12081e+06	7.18281e+06	7.24479e+06	7.30685e+06	7.36901e+06	7.4313e+06	7.49376e+06	7.5564e+06	7.61925e+06	7.6823e+06	7.74552e+06	7.80882e+06	7.87215e+06	7.93551e+06	7.99886e+06	8.06213e+06	8.1252e+06	8.18801e+06	8.25052e+06	8.31274e+06	8.37467e+06	8.43632e+06
9	High variant	Upper-middle-income countries	e	1502	2.58836e+06	2.61025e+06	2.63189e+06	2.65316e+06	2.674e+06	2.69433e+06	2.71413e+06	2.73341e+06	2.75218e+06	2.7705e+06	2.7884e+06	2.80589e+06	2.82295e+06	2.83949e+06	2.85539e+06	2.87059e+06	2.88506e+06	2.89885e+06	2.91204e+06	2.92473e+06	2.93702e+06	2.94895e+06	2.96052e+06	2.9718e+06	2.98286e+06	2.99376e+06	3.00454e+06	3.01521e+06	3.02579e+06	3.03631e+06	3.04676e+06	3.05716e+06	3.06752e+06	3.07783e+06	3.08806e+06	3.09819e+06	3.10823e+06	3.11816e+06	3.12798e+06	3.13765e+06	3.14715e+06	3.15649e+06	3.16567e+06	3.1747e+06	3.18361e+06
10	High variant	Lower-middle-income countries	e	1501	2.9699e+06	3.01565e+06	3.06303e+06	3.11173e+06	3.16149e+06	3.21209e+06	3.26336e+06	3.31517e+06	3.36742e+06	3.42006e+06	3.47303e+06	3.52625e+06	3.57961e+06	3.63292e+06	3.68599e+06	3.73867e+06	3.79089e+06	3.84267e+06	3.89408e+06	3.94527e+06	3.99633e+06	4.0473e+06	4.09816e+06	4.14901e+06	4.19995e+06	4.25103e+06	4.30231e+06	4.3538e+06	4.40551e+06	4.45746e+06	4.50965e+06	4.56209e+06	4.61478e+06	4.66768e+06	4.72076e+06	4.77396e+06	4.82728e+06	4.8807e+06	4.93415e+06	4.98755e+06	5.04086e+06	5.09403e+06	5.14707e+06	5.19997e+06	5.25271e+06
11	High variant	Low-income countries	e	1500	641859	659973	678709	698023	717880	738255	759135	780517	802409	824823	847769	871245	895230	919680	944536	969756	995322	1.02124e+06	1.04753e+06	1.0742e+06	1.10127e+06	1.12876e+06	1.15664e+06	1.18494e+06	1.21366e+06	1.24281e+06	1.2724e+06	1.30243e+06	1.3329e+06	1.3638e+06	1.39514e+06	1.42692e+06	1.45912e+06	1.49174e+06	1.52478e+06	1.55823e+06	1.59208e+06	1.62631e+06	1.66092e+06	1.69587e+06	1.73116e+06	1.76676e+06	1.80267e+06	1.83887e+06	1.87536e+06
12	High variant	Sub-Saharan Africa	f	947	969234	996810	1.02529e+06	1.05463e+06	1.08478e+06	1.11572e+06	1.14743e+06	1.17992e+06	1.2132e+06	1.2473e+06	1.28223e+06	1.318e+06	1.35458e+06	1.39191e+06	1.42993e+06	1.46857e+06	1.50781e+06	1.54767e+06	1.58816e+06	1.62933e+06	1.67119e+06	1.71376e+06	1.75703e+06	1.801e+06	1.8457e+06	1.89114e+06	1.93731e+06	1.98423e+06	2.03188e+06	2.08027e+06	2.12938e+06	2.17923e+06	2.22979e+06	2.28106e+06	2.33303e+06	2.38569e+06	2.43902e+06	2.49302e+06	2.54765e+06	2.60289e+06	2.6587e+06	2.71507e+06	2.77199e+06	2.82944e+06	2.88742e+06
13	High variant	AFRICA		903	1.19437e+06	1.22651e+06	1.2596e+06	1.29358e+06	1.32841e+06	1.36403e+06	1.40045e+06	1.43767e+06	1.47569e+06	1.51454e+06	1.55424e+06	1.5948e+06	1.63618e+06	1.67833e+06	1.72117e+06	1.76465e+06	1.80873e+06	1.85344e+06	1.8988e+06	1.94487e+06	1.99169e+06	2.03926e+06	2.08757e+06	2.13665e+06	2.18648e+06	2.2371e+06	2.28849e+06	2.34066e+06	2.3936e+06	2.4473e+06	2.50176e+06	2.55697e+06	2.61293e+06	2.66961e+06	2.727e+06	2.78508e+06	2.84385e+06	2.90329e+06	2.96337e+06	3.02405e+06	3.0853e+06	3.14711e+06	3.20946e+06	3.27235e+06	3.33575e+06
14	High variant	Eastern Africa		910	399458	411120	423169	435575	448315	461375	474746	488428	502425	516749	531405	546393	561700	577295	593138	609201	625473	641957	658660	675597	692776	710200	727864	745780	763956	782403	801121	820111	839375	858915	878732	898825	919188	939819	960710	981853	1.00324e+06	1.02488e+06	1.04674e+06	1.06881e+06	1.09108e+06	1.11355e+06	1.1362e+06	1.15902e+06	1.18202e+06
15	High variant	Burundi		108	10199.3	10546.7	10904.5	11271.9	11648.3	12033.3	12426.6	12827.7	13236.5	13652.8	14076.6	14507.9	14946.9	15393.6	15848.4	16311.7	16783.5	17264.4	17755.5	18258	18773.1	19301.2	19842.5	20397.2	20965.8	21548.4	22145.2	22756	23380.6	24018.3	24668.7	25331.5	26006.5	26692.9	27389.9	28096.7	28813.2	29538.9	30273.6	31016.7	31767.9	32527	33294	34069.2	34853
16	High variant	Comoros		174	777.424	796.476	816.004	835.95	856.268	876.933	897.925	919.213	940.834	962.765	985.028	1007.61	1030.49	1053.63	1076.95	1100.46	1124.1	1147.88	1171.85	1196.02	1220.43	1245.07	1269.95	1295.08	1320.45	1346.09	1371.98	1398.13	1424.54	1451.22	1478.14	1505.32	1532.76	1560.43	1588.32	1616.43	1644.74	1673.24	1701.93	1730.77	1759.74	1788.85	1818.07	1847.41	1876.82
17	High variant	Djibouti		262	927.414	943.148	959.278	975.699	992.334	1009.12	1026.01	1042.98	1060.02	1077.12	1094.27	1111.46	1128.63	1145.7	1162.57	1179.15	1195.42	1211.35	1226.96	1242.27	1257.29	1272.02	1286.44	1300.59	1314.45	1328.06	1341.42	1354.55	1367.45	1380.19	1392.77	1405.21	1417.51	1429.69	1441.77	1453.76	1465.67	1477.49	1489.21	1500.82	1512.3	1523.67	1534.91	1545.97	1556.85
18	High variant	Eritrea		232	4846.98	4966.98	5090.42	5217.17	5347.12	5480.2	5616.34	5755.53	5897.73	6042.96	6191.2	6342.43	6496.56	6653.44	6812.91	6974.84	7139.13	7305.73	7474.69	7646.05	7819.85	7996.03	8174.51	8355.12	8537.74	8722.21	8908.46	9096.42	9286	9477.08	9669.56	9863.37	10058.5	10254.8	10452.5	10651.4	10851.6	11053	11255.5	11459.1	11663.7	11869.4	12076	12283.5	12491.8
19	High variant	Ethiopia		231	99873	102503	105213	107995	110838	113737	116686	119683	122726	125814	128947	132123	135335	138575	141832	145099	148371	151648	154930	158218	161515	164819	168130	171449	174779	178124	181483	184855	188241	191641	195054	198480	201917	205364	208819	212279	215742	219207	222672	226131	229583	233025	236456	239873	243273
20	High variant	Kenya		404	47236.3	48521.5	49841.7	51193.5	52574.7	53983.7	55420	56883.8	58376.1	59898.1	61450.9	63034.5	64646.9	66284.2	67941.1	69613.5	71299.7	73000	74714.3	76443.5	78188	79947.5	81721.4	83510	85313.5	87132.2	88966.1	90815	92679.6	94561	96459.7	98375.5	100308	102256	104219	106196	108185	110188	112200	114222	116252	118287	120329	122374	124424
21	High variant	Madagascar		450	24234.1	24920.2	25636.7	26380.5	27149.1	27940.7	28753.9	29588.2	30443.2	31319.3	32216.6	33134.8	34072.4	35027.1	35995.8	36976.1	37967.3	38969.6	39983.9	41011.5	42053.5	43110.2	44181.5	45268.7	46372.9	47495.4	48636.5	49796.4	50975.6	52174.6	53393.8	54633.1	55892.6	57171.6	58469.5	59785.7	61119.9	62471.6	63839.7	65223	66620.4	68031.3	69455.5	70892.4	72341.8
22	High variant	Malawi		454	17573.6	18113.1	18673.4	19252.5	19849.2	20462.8	21093.1	21740.6	22406	23090.5	23795	24519.8	25264.1	26025.6	26801.4	27589.4	28388.7	29199.8	30023.4	30860.7	31712.8	32579.6	33460.8	34356.8	35267.6	36193.6	37134.8	38091.2	39062.4	40048.1	41048	42061.9	43089.6	44130.9	45185.9	46254.2	47335.6	48429.7	49536	50653.7	51782.3	52921.4	54070.5	55229.3	56397.2
23	High variant	Mauritius	1	480	1259.46	1264.28	1269.4	1274.71	1280.16	1285.66	1291.18	1296.7	1302.24	1307.78	1313.35	1318.92	1324.44	1329.8	1334.9	1339.62	1343.92	1347.82	1351.3	1354.37	1357.04	1359.31	1361.17	1362.69	1363.85	1364.71	1365.29	1365.63	1365.77	1365.8	1365.79	1365.76	1365.74	1365.79	1365.97	1366.31	1366.87	1367.64	1368.61	1369.78	1371.12	1372.64	1374.33	1376.15	1378.08
24	High variant	Mayotte		175	240.02	246.868	253.85	260.954	268.182	275.53	283.002	290.617	298.366	306.282	314.362	322.604	331.003	339.547	348.213	356.992	365.853	374.815	383.869	393.011	402.246	411.558	420.949	430.422	439.961	449.564	459.224	468.946	478.723	488.548	498.402	508.305	518.241	528.21	538.224	548.257	558.34	568.45	578.585	588.76	598.964	609.197	619.45	629.738	640.039
25	High variant	Mozambique		508	28010.7	28861.4	29743.8	30656.3	31598.2	32568.7	33567.8	34595.8	35653.2	36740.7	37859.2	39008.6	40188.2	41396.3	42630.5	43889	45171.1	46477	47807	49161.5	50541.1	51945.4	53374.5	54828.4	56307.7	57812.5	59343	60899.1	62480.8	64088	65720.6	67378.4	69061.4	70770.2	72505.3	74267	76055.2	77869.5	79709.3	81574	83462.8	85375.3	87311.1	89269.1	91248.3
26	High variant	Réunion		638	863.363	870.931	878.793	886.916	895.239	903.716	912.307	920.991	929.747	938.568	947.424	956.308	965.179	973.992	982.696	991.249	999.635	1007.83	1015.85	1023.7	1031.35	1038.83	1046.14	1053.24	1060.17	1066.92	1073.48	1079.88	1086.12	1092.21	1098.19	1104.03	1109.77	1115.42	1121.01	1126.54	1132.03	1137.49	1142.92	1148.35	1153.78	1159.21	1164.65	1170.12	1175.61
27	High variant	Rwanda		646	11629.6	11938.1	12250	12565.1	12883.4	13205	13530.1	13858.9	14191.8	14529.1	14871	15217.6	15568.8	15924.2	16283.1	16645.1	17010	17377.6	17748	18121.1	18497.1	18875.6	19256.4	19639.3	20023.8	20409.4	20796.2	21183.8	21572	21960.6	22349.4	22738.2	23126.9	23515.4	23903.8	24292	24679.8	25067.2	25454	25840.2	26225.7	26610.3	26994	27376.3	27757
28	High variant	Seychelles		690	93.742	94.442	95.105	95.737	96.342	96.914	97.462	97.983	98.478	98.951	99.408	99.844	100.275	100.681	101.071	101.451	101.824	102.181	102.524	102.874	103.22	103.558	103.907	104.253	104.586	104.926	105.26	105.591	105.919	106.232	106.544	106.834	107.113	107.378	107.648	107.887	108.121	108.345	108.56	108.769	108.969	109.162	109.36	109.551	109.741
29	High variant	Somalia		706	13908.1	14328.8	14772.1	15236.6	15721.2	16224.9	16747.1	17287.3	17845.2	18420.7	19013.5	19623.6	20250.3	20892.9	21550.4	22222.1	22907.9	23607.9	24322.4	25052	25797.2	26558.3	27335.4	28129.2	28940.8	29770.7	30619.3	31486.7	32373.5	33280.2	34207.2	35154.5	36122.1	37109.6	38116.6	39142.6	40187.3	41250.7	42331.9	43430.3	44545.2	45676.2	46823.1	47985.3	49162.3
30	High variant	South Sudan		728	11882.1	12235.9	12597.3	12965.3	13339.4	13719.2	14104.6	14495.8	14893.1	15297.2	15708.3	16126.8	16552.3	16983.8	17420.1	17860.3	18304.2	18752.1	19204.5	19662	20125.4	20594.8	21070.2	21552	22040.4	22535.8	23038.3	23548	24065.3	24590.6	25124.1	25665.8	26215.5	26773.2	27338.4	27910.9	28490.4	29076.7	29669.2	30267	30869.6	31476.6	32087.8	32702.7	33320.9
31	High variant	Uganda		800	40144.9	41529.3	42966.9	44454.8	45991.2	47574.8	49205.2	50883.1	52609.4	54385.9	56213.8	58093.5	60023.4	62000.4	64020	66078.8	68175.9	70311.8	72487.1	74703.1	76960.9	79260.4	81601.7	83986.3	86416.1	88892.4	91415.6	93985.9	96603.8	99270.1	101985	104749	107560	110419	113324	116274	119267	122304	125381	128497	131648	134833	138053	141304	144587
32	High variant	United Republic of Tanzania	2	834	53880	55646.6	57474.1	59360.3	61304.2	63305.2	65363.8	67481.3	69659.7	71901.2	74207.9	76580.8	79019.3	81520.5	84080.5	86696.5	89368	92096.2	94882.4	97728.7	100637	103608	106641	109739	112902	116132	119429	122795	126229	129731	133301	136940	140648	144425	148270	152184	156166	160217	164335	168520	172771	177088	181470	185916	190424
33	High variant	Zambia		894	16100.6	16607.1	17135.4	17683.9	18251.4	18837.3	19441.5	20064.1	20705.9	21367.5	22049.9	22753.2	23476.8	24219	24977.7	25751.1	26538.9	27341.5	28159.6	28993.9	29845.4	30714.2	31600.5	32505.4	33430.2	34375.8	35342.7	36331.3	37342.1	38375.4	39431.7	40511.2	41614	42740.1	43889.5	45062	46257.8	47476.5	48717.2	49978.6	51259.9	52560.6	53880.8	55220.4	56579.6
34	High variant	Zimbabwe		716	15777.5	16185.6	16597.5	17012.9	17431.9	17854.7	18281.8	18714	19152	19596.9	20049.6	20510.5	20979.4	21455.6	21937.7	22424.9	22916.7	23413.5	23915.7	24423.8	24938.2	25458.9	25985.5	26517.8	27055.5	27598.3	28145.9	28698	29254.5	29814.9	30378.9	30946.2	31516.5	32089.1	32663.6	33239.2	33815.7	34392.8	34970.1	35547.3	36124.3	36700.7	37276.3	37850.8	38424.2
35	High variant	Middle Africa		911	153743	158732	163892	169216	174701	180342	186140	192096	198213	204494	210944	217563	224347	231290	238380	245610	252976	260481	268126	275918	283860	291952	300192	308580	317116	325798	334626	343600	352718	361980	371383	380928	390612	400434	410393	420489	430719	441081	451572	462186	472920	483771	494736	505814	517006
36	High variant	Angola		24	27859.3	28834.6	29846	30892.3	31972.6	33086.6	34234.5	35416.9	36634.7	37889.2	39181.4	40511.9	41880.1	43284.6	44723	46194	47697	49232.6	50801.8	52406.1	54046.3	55723	57435.9	59185.5	60972	62795.8	64657.1	66556	68492.7	70467.2	72479.6	74529.9	76618.2	78744.4	80908.5	83110.6	85350.5	87628	89942.9	92294.7	94683.1	97107.7	99568.5	102065	104597
37	High variant	Cameroon		120	22834.5	23465.4	24116.1	24785.4	25472.4	26176.6	26897.6	27635.5	28390.5	29163.1	29953.6	30762.2	31588.3	32430.8	33288.1	34159.2	35043.7	35941.8	36854.1	37781.4	38724.4	39683.1	40657.4	41647.7	42654.3	43677.3	44717	45773.2	46845.9	47934.6	49039.2	50159.5	51295.4	52446.9	53614.1	54796.8	55995	57208.2	58436	59677.6	60932.6	62200.5	63481.2	64774.1	66078.9
38	High variant	Central African Republic		140	4546.1	4603.7	4675.05	4759.02	4854.43	4960.12	5074.88	5197.49	5326.73	5461.42	5600.47	5743.03	5888.56	6036.83	6187.85	6341.57	6497.68	6655.78	6815.66	6977.16	7140.14	7304.48	7470.1	7637.05	7805.45	7975.41	8146.9	8319.94	8494.65	8671.19	8849.67	9030.14	9212.57	9397.08	9583.76	9772.67	9963.79	10157.1	10352.4	10549.6	10748.6	10949.2	11151.4	11355	11559.8
39	High variant	Chad		148	14009.4	14460.6	14927.2	15408.1	15902.5	16409.8	16929.7	17462	18006.8	18564.3	19134.5	19717.3	20312.5	20918.9	21535.6	22161.6	22796.5	23440.6	24094.1	24757.6	25431.7	26116.2	26811.1	27516.4	28232.2	28958.7	29695.7	30443.2	31201.1	31969.1	32747.2	33535.1	34332.7	35139.9	35956.6	36782.4	37617.2	38460.9	39313.2	40174	41043.1	41920.2	42805.2	43697.7	44597.6
40	High variant	Congo		178	4995.65	5134.82	5278.21	5425.83	5577.72	5734.02	5894.89	6060.56	6231.3	6407.4	6589.09	6776.49	6969.57	7168.07	7371.62	7579.94	7792.94	8010.65	8233.05	8460.16	8691.97	8928.47	9169.58	9415.2	9665.19	9919.46	10178	10440.7	10707.8	10979.4	11255.4	11535.9	11820.9	12110.6	12405	12704.4	13008.7	13317.9	13632	13951	14274.9	14603.7	14937.3	15275.8	15619.2
41	High variant	Democratic Republic of the Congo		180	76196.6	78832.8	81549.3	84344.3	87217.2	90167.8	93197.3	96307.3	99500.2	102779	106146	109602	113146	116776	120485	124270	128130	132066	136078	140169	144340	148590	152919	157326	161808	166366	170998	175704	180482	185332	190253	195244	200303	205429	210622	215880	221202	226587	232032	237534	243090	248699	254358	260069	265831
42	High variant	Equatorial Guinea		226	1175.39	1222.6	1270.6	1319.13	1368.03	1417.21	1466.64	1516.38	1566.54	1617.27	1668.73	1720.97	1773.94	1827.42	1881.12	1934.82	1988.45	2042.13	2096.12	2150.8	2206.44	2263.13	2320.8	2379.37	2438.7	2498.68	2559.32	2620.61	2682.58	2745.18	2808.39	2872.2	2936.59	3001.6	3067.28	3133.65	3200.72	3268.43	3336.74	3405.56	3474.82	3544.51	3614.57	3684.97	3755.65
43	High variant	Gabon		266	1930.17	1977.09	2024.62	2072.69	2121.25	2170.27	2219.76	2269.72	2320.21	2371.27	2422.97	2475.31	2528.28	2581.8	2635.76	2690.11	2744.79	2799.85	2855.38	2911.44	2968.12	3025.45	3083.39	3141.95	3201.15	3260.97	3321.4	3382.44	3444.04	3506.18	3568.8	3631.88	3695.39	3759.26	3823.44	3887.86	3952.5	4017.32	4082.26	4147.29	4212.35	4277.43	4342.51	4407.56	4472.58
44	High variant	Sao Tome and Principe		678	195.553	200.13	204.866	209.747	214.756	219.88	225.141	230.527	236.04	241.691	247.499	253.443	259.532	265.742	272.036	278.408	284.837	291.336	297.901	304.537	311.255	318.03	324.877	331.802	338.796	345.875	353.017	360.252	367.549	374.929	382.365	389.866	397.439	405.072	412.775	420.548	428.401	436.328	444.311	452.36	460.465	468.627	476.846	485.122	493.465
45	High variant	Northern Africa		912	225136	229700	234308	238951	243621	248312	253022	257747	262486	267242	272013	276801	281605	286421	291246	296079	300917	305766	310635	315541	320493	325496	330547	335645	340784	345963	351178	356431	361718	367035	372379	377746	383136	388542	393963	399392	404829	410271	415716	421161	426602	432039	437472	442902	448331
46	High variant	Algeria		12	39871.5	40656.1	41438.5	42215.9	42986.2	43747.2	44497.8	45236.6	45963.2	46677.1	47378.2	48066.7	48742.4	49405.5	50056	50694.5	51321.3	51938.1	52548.2	53156	53764.9	54376.4	54991.1	55610.8	56237.3	56872	57515.4	58167.4	58827.2	59493.9	60166.1	60843.2	61524.2	62206.4	62886.4	63561.1	64229.5	64890.6	65542.6	66183.4	66811.6	67426.4	68027.6	68615.6	69190.7
47	High variant	Egypt		818	93778.2	95814.7	97843.5	99866.3	101884	103900	105914	107930	109949	111973	114006	116049	118104	120173	122258	124361	126482	128623	130791	132992	135231	137510	139827	142176	144551	146944	149353	151779	154216	156661	159111	161564	164017	166470	168921	171369	173813	176253	178688	181121	183550	185978	188403	190829	193260
48	High variant	Libya		434	6234.95	6333.55	6432.68	6531.9	6630.81	6729.12	6826.57	6923.03	7018.39	7112.6	7205.61	7297.39	7387.76	7476.49	7563.32	7648.06	7730.6	7811.02	7889.59	7966.64	8042.46	8117.13	8190.61	8263.01	8334.39	8404.82	8474.34	8542.95	8610.59	8677.15	8742.55	8806.76	8869.77	8931.5	8991.83	9050.71	9108.1	9164	9218.33	9271.03	9322.07	9371.47	9419.27	9465.56	9510.41
49	High variant	Morocco		504	34803.3	35318.8	35840.4	36365.4	36891.8	37417.7	37941.9	38463.5	38982.2	39497.7	40009.9	40518.4	41022.2	41519.6	42008.8	42488.3	42957.5	43416.7	43866.9	44309.6	44746	45176.4	45600.9	46020.2	46435	46845.9	47253.3	47657.5	48059	48458	48854.9	49249.9	49643	50034.4	50424.1	50812.2	51198.7	51583.4	51965.6	52344.4	52719.3	53090	53456.3	53817.8	54174
50	High variant	Sudan		729	38647.8	39614.8	40626.3	41678.9	42769.6	43896	45055.9	46247.7	47470.1	48722.2	50003	51311.2	52645	54001.9	55379	56773.9	58185.4	59612.9	61056.2	62515.6	63991.1	65482.6	66989.5	68511.9	70049.8	71603.3	73172.4	74757.6	76359.5	77979.1	79617.1	81274	82949.8	84645.4	86361.8	88099.5	89858.7	91639.2	93440.8	95263.2	97105.7	98968.1	100850	102750	104667
51	High variant	Tunisia		788	11273.7	11421.2	11570.6	11720.7	11870.6	12019.4	12166.3	12310.9	12452.6	12591.3	12726.8	12858.8	12987	13111.3	13231.4	13347	13458.3	13565.5	13669.4	13771.2	13871.7	13971.3	14070.2	14168.8	14267.9	14367.8	14468.7	14570.7	14673.9	14778.1	14883.2	14989.2	15095.9	15203	15310	15416.3	15522	15626.7	15730	15831.7	15931.2	16028.4	16123.4	16216.1	16306.5
52	High variant	Western Sahara		732	526.216	541.051	556.209	571.623	587.261	603.062	618.989	635.046	651.21	667.47	683.812	700.246	716.731	733.214	749.655	765.996	782.241	798.376	814.415	830.372	846.275	862.126	877.906	893.644	909.36	925.062	940.76	956.466	972.185	987.934	1003.73	1019.57	1035.47	1051.38	1067.28	1083.15	1098.99	1114.79	1130.54	1146.2	1161.81	1177.31	1192.73	1208.05	1223.26
53	High variant	Southern Africa		913	63419.6	64368	65331	66304.5	67284.9	68269.1	69255	70240.6	71225.1	72207.8	73188.1	74165.3	75138.1	76104.8	77062.9	78011.3	78949.1	79877.1	80797.7	81714.1	82628.8	83542.7	84456.1	85370.2	86286.9	87207	88131.6	89060.7	89994.5	90933	91875.7	92822.7	93773.9	94728.7	95686.5	96646.7	97608.8	98572.2	99535.8	100498	101458	102414	103367	104316	105261
54	High variant	Botswana		72	2209.2	2253.85	2299.45	2345.78	2392.64	2439.9	2487.43	2535.15	2583.01	2630.98	2679.04	2727.13	2775.18	2823.06	2870.62	2917.74	2964.39	3010.56	3056.36	3101.89	3147.24	3192.46	3237.52	3282.45	3327.33	3372.21	3417.06	3461.92	3506.76	3551.56	3596.32	3641.01	3685.61	3730.07	3774.35	3818.39	3862.15	3905.6	3948.7	3991.39	4033.62	4075.37	4116.62	4157.34	4197.51
55	High variant	Lesotho		426	2174.64	2207.45	2241.13	2275.57	2310.65	2346.29	2382.41	2418.99	2456.02	2493.47	2531.35	2569.68	2608.41	2647.51	2686.88	2726.52	2766.4	2806.55	2847.12	2888.26	2930.11	2972.7	3016.02	3060.11	3104.97	3150.61	3197.05	3244.27	3292.2	3340.76	3389.87	3439.49	3489.6	3540.13	3591.01	3642.19	3693.61	3745.24	3797	3848.79	3900.56	3952.26	4003.86	4055.34	4106.65
56	High variant	Namibia		516	2425.56	2482.5	2540.95	2600.64	2661.39	2723.06	2785.54	2848.81	2912.87	2977.78	3043.56	3110.2	3177.62	3245.61	3313.93	3382.4	3450.96	3519.65	3588.59	3657.97	3727.9	3798.43	3869.55	3941.33	4013.83	4087.14	4161.26	4236.18	4311.89	4388.38	4465.6	4543.53	4622.13	4701.31	4780.98	4861.04	4941.4	5022.07	5102.9	5183.79	5264.66	5345.43	5426.08	5506.55	5586.83
57	High variant	South Africa		710	55291.2	56078.9	56877.5	57683.3	58493.4	59305.2	60116.8	60926.6	61733.7	62537.3	63337	64132.1	64921.6	65704.1	66477.7	67241.6	67995.1	68739.1	69475.2	70206.2	70934.3	71660.1	72383.9	73107	73830.8	74556.4	75284.4	76015.1	76748.8	77485.5	78225.1	78967.6	79713.1	80461.3	81211.7	81964	82717.9	83473	84228.4	84982.8	85735.3	86485.4	87232.9	87977.4	88718.8
58	High variant	Swaziland		748	1319.01	1345.21	1371.98	1399.2	1426.78	1454.66	1482.76	1511.06	1539.55	1568.23	1597.09	1626.12	1655.3	1684.54	1713.8	1743.03	1772.19	1801.3	1830.47	1859.77	1889.3	1919.07	1949.08	1979.34	2009.88	2040.7	2071.81	2103.21	2134.86	2166.73	2198.79	2231.02	2263.4	2295.89	2328.47	2361.07	2393.68	2426.28	2458.82	2491.24	2523.54	2555.65	2587.59	2619.34	2650.89
59	High variant	Western Africa		914	352614	362589	372902	383537	394483	405735	417291	429156	441338	453846	466690	479874	493391	507223	521348	535746	550414	565355	580579	596100	611929	628068	644514	661270	678341	695728	713433	731455	749791	768438	787393	806654	826217	846081	866244	886702	907453	928491	949808	971394	993239	1.01534e+06	1.03769e+06	1.06029e+06	1.08313e+06
60	High variant	Benin		204	10576	10885.1	11205	11534.6	11873.4	12221	12577.1	12941.8	13315.1	13697.3	14088.5	14488.8	14897.7	15314.5	15738.4	16168.5	16604.5	17046.7	17495.4	17950.8	18413.4	18883.4	19360.5	19845	20337.1	20837	21344.8	21860.4	22384.1	22916	23456.1	24004.6	24561.2	25126	25698.9	26279.6	26868.2	27464.4	28067.8	28678	29294.6	29917.3	30546	31180.7	31821.2
61	High variant	Burkina Faso		854	18110.6	18665.8	19240	19832.4	20442.3	21069.4	21713.6	22375.1	23054.3	23752	24468.5	25204.1	25958.1	26729.4	27516.3	28317.6	29132.8	29962.1	30805.7	31664.1	32537.7	33426.6	34330.4	35249.2	36183.2	37132.4	38096.9	39076.4	40071	41080.4	42104.6	43143.2	44196.3	45264	46346.5	47443.9	48556	49682.5	50822.7	51975.9	53141.3	54318.5	55507.4	56707.6	57919
62	High variant	Cabo Verde		132	532.913	540.436	548.315	556.467	564.848	573.407	582.113	590.951	599.895	608.954	618.103	627.339	636.625	645.908	655.138	664.258	673.258	682.13	690.885	699.542	708.124	716.614	725.02	733.351	741.62	749.829	757.985	766.099	774.175	782.215	790.242	798.256	806.249	814.215	822.139	830.016	837.826	845.581	853.265	860.879	868.401	875.845	883.197	890.445	897.58
63	High variant	Côte d'Ivoire		384	23108.5	23716.1	24349.6	25007.2	25687.4	26389.2	27111.9	27855	28618.7	29402.9	30207.9	31033.5	31879.2	32743.8	33626	34524.8	35439.8	36371.5	37320.8	38289.1	39277.5	40286.5	41315.9	42366.4	43438.6	44532.9	45649.6	46788.8	47950.3	49134.1	50339.8	51567.7	52817.5	54088.7	55380.5	56692.4	58024.1	59375.6	60747.1	62139	63551.6	64984.7	66438.2	67911.9	69405.5
64	High variant	Gambia		270	1977.59	2040.7	2105.8	2172.76	2241.46	2311.84	2383.84	2457.45	2532.65	2609.48	2687.93	2767.99	2849.58	2932.54	3016.69	3101.89	3188.06	3275.18	3363.25	3452.31	3542.38	3633.42	3725.37	3818.21	3911.9	4006.41	4101.7	4197.76	4294.54	4392.01	4490.13	4588.87	4688.22	4788.13	4888.64	4989.72	5091.33	5193.45	5296.02	5399.03	5502.43	5606.17	5710.23	5814.54	5919.03
65	High variant	Ghana		288	27582.8	28240	28911.8	29596.9	30294.2	31002.8	31722.4	32452.7	33194	33946.5	34710.6	35486.2	36272.8	37068.9	37873.2	38684.3	39501.8	40326	41157.5	41997	42845.2	43702.3	44568.1	45443.2	46328	47223.1	48128.4	49043.9	49969.4	50904.5	51848.9	52802.3	53764.6	54735.1	55713.3	56698.5	57690.3	58688.6	59692.6	60702	61716.1	62734.7	63757.6	64784.4	65815.1
66	High variant	Guinea		324	12091.5	12418.1	12759.6	13114.8	13482.9	13863.2	14255.1	14658.2	15072.4	15497.4	15933.1	16379.4	16835.7	17301.3	17775.4	18257.1	18746.2	19242.6	19746.7	20258.9	20779.6	21308.6	21846	22391.9	22946.4	23509.6	24081.6	24662.3	25251.7	25849.8	26456.7	27072.1	27696	28328.2	28968.5	29616.5	30272.1	30935.1	31605.4	32282.8	32967.1	33658.1	34355.6	35059.3	35768.6
67	High variant	Guinea-Bissau		624	1770.53	1817.65	1866.02	1915.53	1966.09	2017.62	2070.09	2123.47	2177.74	2232.92	2289.02	2346.01	2403.89	2462.59	2522.02	2582.15	2642.94	2704.43	2766.7	2829.86	2893.98	2959.1	3025.21	3092.32	3160.46	3229.63	3299.84	3371.08	3443.34	3516.58	3590.79	3665.93	3742	3818.91	3896.62	3975.06	4054.18	4133.98	4214.38	4295.33	4376.8	4458.72	4541.11	4623.95	4707.24
68	High variant	Liberia		430	4499.62	4620.31	4745.65	4875.32	5009.05	5146.67	5288.11	5433.35	5582.43	5735.47	5892.53	6053.62	6218.58	6387.07	6558.67	6733.06	6910.11	7089.85	7272.39	7457.9	7646.51	7838.25	8033.06	8230.96	8432	8636.2	8843.59	9054.16	9267.91	9484.84	9704.97	9928.26	10154.7	10384.3	10617.1	10853	11092.1	11334.3	11579.5	11827.6	12078.4	12331.8	12588	12846.6	13107.9
69	High variant	Mali		466	17467.9	18020.7	18594.4	19188.6	19802.8	20436.8	21091	21765.6	22461.1	23178.4	23918	24680	25463.9	26268.6	27092.3	27933.8	28792.5	29668.4	30561.5	31472	32400	33345.3	34307.5	35286.1	36281	37291.8	38318.2	39360.1	40417.2	41489.1	42575.7	43676.6	44791.6	45920.7	47064.3	48222.2	49394.3	50580.2	51779.4	52991.2	54215	55450.3	56697	57954.8	59223.7
70	High variant	Mauritania		478	4182.34	4304.45	4429.67	4557.76	4688.52	4821.8	4957.51	5095.58	5235.99	5378.76	5523.89	5671.35	5821.05	5972.83	6126.47	6281.84	6438.85	6597.55	6758.03	6920.45	7084.95	7251.52	7420.18	7590.98	7763.96	7939.17	8116.64	8296.37	8478.38	8662.69	8849.29	9038.17	9229.31	9422.67	9618.19	9815.78	10015.4	10217.1	10420.7	10626.2	10833.6	11042.8	11253.7	11466.3	11680.4
71	High variant	Niger		562	19897	20689.7	21521	22390.4	23297.8	24243.6	25228.2	26252.7	27318.3	28426.3	29578.2	30774.8	32016.5	33302.7	34632.5	36005.5	37422	38883.1	40390.2	41945.1	43549.5	45204	46909.2	48666.2	50475.8	52339	54256.4	56228.5	58255.6	60338	62475.7	64669.2	66918.4	69223.4	71584.4	74001.1	76473.5	79001.3	81584	84221.1	86911.9	89656	92452.8	95301.9	98202.8
72	High variant	Nigeria		566	181182	186178	191335	196646	202108	207718	213479	219393	225465	231701	238107	244685	251432	258341	265399	272599	279938	287417	295043	302821	310756	318849	327099	335507	344073	352798	361682	370724	379923	389275	398780	408434	418238	428189	438288	448534	458925	469459	480130	490932	501861	512913	524087	535383	546799
73	High variant	Saint Helena	3	654	4.034	4.054	4.078	4.104	4.127	4.161	4.193	4.223	4.255	4.292	4.32	4.354	4.384	4.423	4.453	4.481	4.504	4.525	4.54	4.56	4.574	4.582	4.595	4.599	4.605	4.61	4.608	4.612	4.619	4.619	4.623	4.63	4.628	4.638	4.642	4.65	4.659	4.673	4.692	4.697	4.712	4.725	4.739	4.758	4.777
74	High variant	Senegal		686	14977	15427.8	15890.3	16364.2	16848.9	17344.2	17850.1	18366.7	18894.2	19433.1	19983.7	20546.1	21120.2	21705.3	22300.8	22906.1	23520.9	24145.7	24780.8	25426.9	26084.6	26754.1	27435.2	28128.1	28832.9	29549.7	30278.5	31019.3	31771.8	32536.1	33311.7	34098.6	34896.7	35705.6	36525.1	37354.9	38194.8	39044.6	39904	40772.9	41651	42538	43434	44338.7	45252.2
75	High variant	Sierra Leone		694	7237.02	7405.73	7578.38	7754.48	7933.62	8115.55	8300.19	8487.56	8677.8	8871.16	9067.79	9267.73	9470.66	9675.99	9882.89	10090.8	10299.3	10508.6	10718.8	10930.1	11142.6	11356.5	11571.4	11787.5	12004.7	12223.1	12442.5	12663	12884.6	13107.1	13330.7	13555.1	13780.4	14006.5	14233.3	14460.7	14688.7	14917.2	15145.8	15374.3	15602.4	15830	16057	16283.3	16508.9
76	High variant	Togo		768	7416.8	7614.7	7817.79	8025.73	8238.26	8455.27	8676.77	8902.86	9133.78	9369.79	9611.12	9857.84	10109.8	10366.3	10626.9	10891	11158.3	11429	11703.1	11980.9	12262.4	12547.6	12836.5	13129	13425.4	13725.7	14029.7	14337.6	14649.3	14964.6	15283.4	15605.8	15931.6	16260.9	16593.8	16930.3	17270.3	17613.9	17960.7	18310.5	18663	19018.3	19376.2	19736.7	20100
77	High variant	ASIA		935	4.4199e+06	4.46813e+06	4.51716e+06	4.56663e+06	4.61627e+06	4.66586e+06	4.71524e+06	4.7643e+06	4.813e+06	4.86132e+06	4.90925e+06	4.95674e+06	5.00366e+06	5.04978e+06	5.09485e+06	5.13868e+06	5.18118e+06	5.22241e+06	5.26248e+06	5.30155e+06	5.33978e+06	5.37719e+06	5.41382e+06	5.44981e+06	5.4853e+06	5.52043e+06	5.55527e+06	5.58985e+06	5.62421e+06	5.6584e+06	5.69244e+06	5.72635e+06	5.76015e+06	5.79381e+06	5.82728e+06	5.86051e+06	5.89351e+06	5.92625e+06	5.95869e+06	5.99073e+06	6.02233e+06	6.05346e+06	6.08413e+06	6.11435e+06	6.14413e+06
78	High variant	Eastern Asia		906	1.63515e+06	1.6441e+06	1.65292e+06	1.66152e+06	1.66984e+06	1.67784e+06	1.68548e+06	1.69274e+06	1.69962e+06	1.70612e+06	1.71227e+06	1.71804e+06	1.72343e+06	1.72838e+06	1.73283e+06	1.73675e+06	1.74013e+06	1.74298e+06	1.74537e+06	1.74734e+06	1.74894e+06	1.75021e+06	1.75115e+06	1.75181e+06	1.75225e+06	1.7525e+06	1.7526e+06	1.75256e+06	1.75241e+06	1.75216e+06	1.75183e+06	1.75145e+06	1.75102e+06	1.75054e+06	1.75e+06	1.74941e+06	1.74878e+06	1.7481e+06	1.74738e+06	1.74661e+06	1.74579e+06	1.74492e+06	1.74401e+06	1.74308e+06	1.74215e+06
79	High variant	China	4	156	1.39703e+06	1.40543e+06	1.41368e+06	1.42171e+06	1.42947e+06	1.43691e+06	1.44401e+06	1.45075e+06	1.45713e+06	1.46315e+06	1.46881e+06	1.47413e+06	1.47907e+06	1.4836e+06	1.48769e+06	1.4913e+06	1.49443e+06	1.4971e+06	1.49936e+06	1.50125e+06	1.50285e+06	1.50415e+06	1.50519e+06	1.50599e+06	1.5066e+06	1.50706e+06	1.50739e+06	1.50761e+06	1.50772e+06	1.50773e+06	1.50766e+06	1.50751e+06	1.50729e+06	1.507e+06	1.50663e+06	1.50616e+06	1.50562e+06	1.50499e+06	1.50429e+06	1.50352e+06	1.50267e+06	1.50175e+06	1.50078e+06	1.49978e+06	1.49875e+06
80	High variant	China, Hong Kong SAR	5	344	7245.7	7324.54	7402.85	7479.41	7553.48	7624.79	7693.55	7760.44	7826.53	7893.11	7961.27	8031.48	8103.12	8174.35	8242.61	8306	8363.98	8417.03	8465.58	8510.4	8552.17	8591.02	8626.94	8660.43	8692.06	8722.35	8751.6	8780.09	8808.32	8836.79	8865.92	8895.98	8927.14	8959.69	8993.88	9029.9	9067.83	9107.66	9149.28	9192.48	9237.06	9282.94	9329.99	9377.73	9425.68
81	High variant	China, Macao SAR	6	446	600.942	611.892	623.278	634.982	646.902	658.946	671.051	683.143	695.194	707.182	719.053	730.801	742.362	753.691	764.725	775.424	785.747	795.729	805.396	814.8	823.996	832.998	841.813	850.505	859.117	867.716	876.311	884.926	893.596	902.359	911.245	920.266	929.43	938.717	948.083	957.512	967.003	976.54	986.108	995.689	1005.28	1014.85	1024.39	1033.89	1043.32
82	High variant	China, Taiwan Province of China		158	23485.8	23590.7	23699.1	23809.9	23922	24034.4	24146.6	24258.1	24368.4	24477.4	24584.6	24689.7	24791.7	24889.3	24980.7	25064.8	25141	25208.8	25267.3	25315.7	25353.2	25379.7	25395.3	25400.6	25395.9	25381.9	25359.1	25328.1	25290.8	25249.4	25205.7	25160.5	25114.5	25068.9	25025	24983.7	24945.8	24911.4	24880.6	24853.3	24829.2	24808.5	24790.9	24775.8	24762.3
83	High variant	Dem. People's Republic of Korea		408	25243.9	25396	25556.9	25724.2	25895.7	26069.7	26245.2	26421.4	26598	26775.1	26952.6	27130.1	27306.2	27478.9	27645.7	27804.4	27954.4	28095.9	28228.9	28354	28471.7	28582.2	28685.7	28783.3	28876.3	28965.7	29052.2	29136.3	29219.5	29303.3	29389.1	29477.4	29568.4	29662.6	29759.9	29860.4	29964.4	30071.7	30181.8	30293.9	30407.3	30521.8	30637.3	30753	30868.4
84	High variant	Japan		392	127975	127868	127756	127636	127506	127363	127207	127038	126855	126660	126454	126237	126009	125766	125506	125228	124931	124617	124288	123946	123594	123233	122865	122493	122121	121750	121384	121025	120676	120343	120028	119733	119459	119207	118979	118775	118595	118438	118301	118178	118065	117961	117864	117773	117683
85	High variant	Mongolia		496	2976.88	3030.99	3084.64	3137.66	3189.89	3241.24	3291.61	3340.99	3389.37	3436.79	3483.27	3528.86	3573.54	3617.31	3660.1	3701.93	3742.83	3782.9	3822.42	3861.66	3900.89	3940.23	3979.71	4019.48	4059.7	4100.47	4141.84	4183.83	4226.46	4269.73	4313.61	4358.1	4403.12	4448.5	4494	4539.42	4584.69	4629.76	4674.48	4718.66	4762.18	4804.99	4847.1	4888.51	4929.29
86	High variant	Republic of Korea		410	50593.7	50849.2	51114.1	51384.9	51658.8	51933.6	52208.1	52481.7	52754.5	53026.7	53298.6	53569.3	53836.4	54095.5	54341.3	54569.4	54778.2	54967	55134.3	55278.6	55398.8	55494.5	55566	55614.5	55642.1	55650.4	55640.7	55614.1	55573.4	55521.6	55461.6	55395.1	55323.4	55249.2	55175.1	55103.3	55035.4	54971.9	54913.6	54860.7	54813.2	54771.6	54736	54706	54680.7
87	High variant	South-Central Asia	7	921	1.89201e+06	1.91833e+06	1.94535e+06	1.97288e+06	2.00074e+06	2.02882e+06	2.05702e+06	2.08527e+06	2.11354e+06	2.14182e+06	2.17008e+06	2.19829e+06	2.22638e+06	2.2542e+06	2.28161e+06	2.30849e+06	2.33478e+06	2.36051e+06	2.38573e+06	2.4105e+06	2.43491e+06	2.45897e+06	2.48267e+06	2.50609e+06	2.52933e+06	2.55244e+06	2.57546e+06	2.5984e+06	2.62127e+06	2.64407e+06	2.66681e+06	2.6895e+06	2.71212e+06	2.73465e+06	2.75705e+06	2.77926e+06	2.80129e+06	2.82311e+06	2.84468e+06	2.86594e+06	2.88686e+06	2.90741e+06	2.9276e+06	2.94741e+06	2.96686e+06
88	High variant	Central Asia		5500	68705	69888.5	71068.6	72242.4	73407.6	74561.9	75703.7	76831.4	77944.1	79041	80121.8	81186.4	82235.2	83269.2	84289.4	85297.3	86293.4	87279.6	88260.6	89242.4	90229.7	91224.1	92225.8	93235.6	94254	95281.1	96317.1	97361.5	98411.8	99464.5	100517	101568	102616	103659	104695	105720	106735	107738	108729	109707	110672	111623	112561	113488	114405
89	High variant	Kazakhstan		398	17749.6	17998.3	18243.2	18484.1	18720.9	18953.4	19181.7	19405.7	19625.6	19841.5	20053.8	20262.6	20468.3	20671.3	20872.2	21071.5	21269.5	21466.7	21664.5	21864.4	22067.5	22274.4	22485.2	22700.2	22919.8	23143.9	23372.9	23606.4	23844	24085	24328.6	24574.7	24822.9	25072.2	25321.6	25570.1	25817.5	26063.4	26307.5	26549.4	26788.9	27025.7	27260	27492.2	27722.6
90	High variant	Kyrgyzstan		417	5865.4	5966.87	6067.46	6167.08	6265.68	6363.19	6459.56	6554.74	6648.72	6741.45	6832.97	6923.3	7012.53	7100.84	7188.37	7275.33	7361.79	7447.87	7533.96	7620.48	7707.78	7795.98	7885.08	7975.05	8065.8	8157.23	8249.33	8342.1	8435.33	8528.79	8622.27	8715.69	8808.99	8902.08	8994.86	9087.27	9179.24	9270.72	9361.66	9451.99	9541.66	9630.67	9719.04	9806.85	9894.23
91	High variant	Tajikistan		762	8548.65	8748.24	8950.47	9154.75	9360.58	9567.51	9775.14	9983.11	10191.2	10399	10606.6	10813.8	11020.6	11227.1	11433.5	11640.2	11847	12054.2	12262.8	12473.6	12687.5	12904.7	13125.1	13348.8	13575.8	13806.1	14039.7	14276.3	14515.4	14756.2	14998.1	15240.7	15484.1	15727.6	15970.9	16213.6	16455.5	16696.6	16936.7	17175.8	17413.8	17650.9	17887	18122.4	18357.7
92	High variant	Turkmenistan		795	5565.28	5671.79	5777.84	5883.17	5987.54	6090.75	6192.6	6293	6391.8	6488.95	6584.41	6678.2	6770.37	6861.01	6950.27	7038.33	7125.23	7211.16	7296.65	7382.33	7468.7	7555.95	7644.05	7733.06	7822.95	7913.66	8005.23	8097.56	8190.41	8283.44	8376.34	8469	8561.3	8652.98	8743.71	8833.23	8921.44	9008.3	9093.76	9177.86	9260.59	9341.97	9422.05	9500.99	9578.99
93	High variant	Uzbekistan		860	30976	31503.3	32029.6	32553.3	33072.9	33587.1	34094.7	34594.9	35086.9	35570	36044	36508.6	36963.5	37408.9	37845	38272	38690	39099.6	39502.7	39901.6	40298.2	40693.1	41086.4	41478.5	41869.7	42260.1	42650	43039.2	43426.7	43811.2	44191.6	44567.4	44938.5	45304.2	45663.6	46016.1	46361.3	46699.3	47029.7	47352.2	47667	47973.9	48273.3	48565.6	48851.7
94	High variant	Southern Asia		5501	1.82331e+06	1.84845e+06	1.87428e+06	1.90063e+06	1.92734e+06	1.95426e+06	1.98132e+06	2.00844e+06	2.0356e+06	2.06278e+06	2.08996e+06	2.11711e+06	2.14414e+06	2.17093e+06	2.19732e+06	2.22319e+06	2.24849e+06	2.27323e+06	2.29747e+06	2.32126e+06	2.34468e+06	2.36774e+06	2.39044e+06	2.41286e+06	2.43507e+06	2.45716e+06	2.47915e+06	2.50104e+06	2.52286e+06	2.54461e+06	2.5663e+06	2.58793e+06	2.60951e+06	2.63099e+06	2.65235e+06	2.67354e+06	2.69455e+06	2.71537e+06	2.73595e+06	2.75624e+06	2.77619e+06	2.79579e+06	2.81504e+06	2.83393e+06	2.85246e+06
95	High variant	Afghanistan		4	33736.5	34632.3	35545	36472.3	37412.4	38364	39326.4	40299.8	41284.5	42281.4	43291	44313	45345.8	46386.4	47430.7	48475.5	49519.4	50562.2	51603.7	52644.2	53683.8	54722.1	55758.1	56791.6	57822.4	58850.3	59875.1	60896.3	61913.7	62927.1	63936.2	64940.6	65940.1	66935	67925.3	68911.1	69892.3	70868.2	71838.3	72801.9	73758.3	74707.1	75647.7	76579.3	77500.8
96	High variant	Bangladesh		50	161201	163086	165087	167181	169348	171570	173830	176113	178407	180701	182986	185253	187493	189698	191858	193969	196024	198024	199973	201880	203752	205591	207396	209170	210920	212648	214357	216047	217718	219369	220998	222606	224194	225759	227303	228822	230318	231790	233236	234655	236046	237407	238741	240046	241322
97	High variant	Bhutan		64	787.386	798.332	809.557	820.945	832.44	843.974	855.49	866.965	878.362	889.685	900.911	912.033	923.008	933.783	944.279	954.462	964.311	973.829	983.041	991.987	1000.72	1009.23	1017.53	1025.64	1033.61	1041.44	1049.16	1056.77	1064.3	1071.76	1079.16	1086.53	1093.85	1101.11	1108.31	1115.44	1122.51	1129.47	1136.33	1143.05	1149.6	1155.97	1162.15	1168.14	1173.91
98	High variant	India		356	1.30905e+06	1.32581e+06	1.34304e+06	1.36062e+06	1.37842e+06	1.39636e+06	1.41438e+06	1.43244e+06	1.45052e+06	1.46864e+06	1.48679e+06	1.50495e+06	1.52305e+06	1.54099e+06	1.55861e+06	1.57583e+06	1.5926e+06	1.60892e+06	1.62482e+06	1.64035e+06	1.65553e+06	1.67037e+06	1.68487e+06	1.69912e+06	1.71317e+06	1.72711e+06	1.74095e+06	1.75471e+06	1.76841e+06	1.78207e+06	1.7957e+06	1.80933e+06	1.82294e+06	1.83652e+06	1.85004e+06	1.86347e+06	1.87682e+06	1.89006e+06	1.90316e+06	1.91608e+06	1.92878e+06	1.94124e+06	1.95348e+06	1.96547e+06	1.97722e+06
99	High variant	Iran (Islamic Republic of)		364	79360.5	80434.6	81493.9	82535.2	83555.4	84551.3	85519.8	86458	87362.9	88232	89063.4	89856.5	90612.6	91334.7	92027	92693.9	93336.4	93956.8	94562	95160.1	95757.5	96356.7	96958	97562	98168.5	98776.7	99387	99998.5	100608	101211	101804	102385	102952	103502	104030	104533	105009	105458	105876	106262	106613	106930	107213	107463	107682
100	High variant	Maldives		462	418.403	427.955	437.254	446.289	455.057	463.552	471.759	479.669	487.265	494.529	501.453	508.047	514.31	520.287	526.041	531.604	537.001	542.246	547.393	552.471	557.541	562.608	567.687	572.798	577.96	583.174	588.453	593.788	599.169	604.567	609.965	615.36	620.717	626.023	631.223	636.287	641.215	645.96	650.533	654.897	659.034	662.944	666.635	670.076	673.297
101	High variant	Nepal		524	28656.3	29009.4	29384.8	29777.1	30181.9	30595.3	31014.5	31437.1	31861.9	32287.7	32713.8	33138.8	33560.7	33976.2	34381.8	34774.8	35153.9	35519.5	35872.9	36216.4	36552	36879.9	37200.2	37514.7	37825.4	38133.9	38440.9	38746.6	39050.9	39353.7	39654.6	39953.8	40251.2	40546.5	40839.1	41128.4	41414.3	41696.4	41973.9	42245.6	42510.8	42769	43020.2	43264.1	43500.5
102	High variant	Pakistan		586	189381	193429	197554	201739	205972	210239	214533	218848	223178	227521	231874	236235	240599	244959	249308	253640	257953	262250	266539	270836	275152	279489	283845	288221	292618	297035	301472	305927	310397	314874	319354	323834	328311	332777	337226	341650	346047	350414	354747	359043	363300	367515	371689	375822	379914
103	High variant	Sri Lanka		144	20714	20821.7	20932.4	21045.3	21159.5	21274.4	21389.1	21503	21615.4	21725.7	21833.3	21937.8	22038.9	22136.3	22229.7	22319.1	22404.1	22484.8	22561	22633.2	22701.3	22765.6	22825.8	22881.9	22933.7	22980.8	23023.5	23062.1	23096.9	23128.3	23157	23182.9	23206.6	23228.5	23249.6	23270.3	23291.2	23312.2	23333.4	23354.8	23376.3	23398.1	23420.3	23442.7	23465.3
104	High variant	South-Eastern Asia		920	634610	642460	650506	658691	666967	675295	683647	692004	700353	708692	717013	725307	733551	741705	749725	757578	765248	772740	780070	787265	794349	801325	808194	814970	821665	828295	834865	841384	847859	854299	860711	867100	873469	879822	886162	892490	898809	905117	911406	917665	923886	930067	936207	942301	948345
105	High variant	Brunei Darussalam		96	417.542	423.697	429.953	436.275	442.621	448.977	455.313	461.619	467.883	474.101	480.272	486.383	492.413	498.344	504.126	509.753	515.2	520.479	525.581	530.526	535.312	539.966	544.451	548.819	553.069	557.203	561.261	565.223	569.124	572.97	576.777	580.558	584.309	588.028	591.71	595.348	598.945	602.492	605.992	609.419	612.768	616.035	619.224	622.318	625.318
106	High variant	Cambodia		116	15517.6	15773.7	16035.9	16302.8	16573	16845.5	17119.1	17393.3	17667.3	17940.8	18213.3	18484.5	18753.9	19021	19285.2	19546.1	19803.5	20057.5	20309	20559.1	20808.6	21057.8	21306.7	21555.5	21804.7	22054.5	22304.9	22555.9	22807.6	23059.6	23311.7	23563.9	23816.1	24067.8	24318.6	24568.1	24816.1	25062.5	25306.9	25548.7	25787.7	26023.6	26256.5	26486.2	26713
107	High variant	Indonesia		360	258162	261421	264730	268071	271429	274793	278155	281508	284851	288183	291504	294811	298096	301346	304545	307682	310750	313753	316694	319582	322424	325221	327974	330686	333363	336010	338629	341223	343793	346340	348865	351371	353859	356330	358786	361229	363660	366080	368487	370879	373257	375620	377969	380304	382624
108	High variant	Lao People's Democratic Republic		418	6663.97	6775.32	6888.97	7004.28	7120.71	7237.84	7355.34	7473.01	7590.74	7708.47	7826.18	7943.71	8060.81	8177.02	8291.78	8404.69	8515.54	8624.38	8731.37	8836.83	8941	9043.88	9145.43	9245.75	9344.96	9443.16	9540.39	9636.65	9731.91	9826.1	9919.21	10011.2	10102	10191.7	10280.2	10367.5	10453.5	10538.2	10621.4	10703.2	10783.3	10861.8	10938.7	11013.9	11087.3
109	High variant	Malaysia	8	458	30723.2	31186	31670.2	32170.5	32682.6	33202.9	33728.5	34257.4	34787.9	35319.1	35850	36379.2	36904.6	37422.9	37930.4	38424.3	38903.2	39367.4	39817.4	40254.6	40680.3	41094.9	41498.6	41893.1	42280.2	42661.7	43038.5	43411.4	43782.5	44154.1	44528.1	44905.3	45285.8	45670.1	46058.3	46450.4	46846.3	47245.8	47647.3	48049.2	48449.8	48848.4	49244.3	49636	50021.7
110	High variant	Myanmar		104	52403.7	52960.7	53535.8	54123.9	54720.7	55323.1	55929.1	56537.4	57147.8	57760.6	58375.9	58992.8	59608.7	60218.8	60817.3	61399.7	61964.1	62510.5	63039.1	63551.2	64047.7	64528.6	64993.6	65443.8	65880.1	66303.8	66715.6	67116.2	67507.6	67892	68271	68645.6	69016.5	69384.9	69752	70118.8	70485.8	70853.2	71220.9	71588.2	71954.7	72320.3	72684.9	73047.8	73408.1
111	High variant	Philippines		608	101716	103427	105193	107004	108852	110730	112632	114557	116501	118464	120446	122444	124454	126469	128479	130479	132464	134436	136397	138352	140303	142252	144197	146139	148080	150021	151962	153904	155847	157792	159739	161688	163639	165593	167551	169514	171481	173452	175425	177397	179366	181330	183290	185245	187194
112	High variant	Singapore		702	5535.26	5643.3	5741.58	5830.66	5911.27	5984.37	6051.13	6112.98	6171.43	6228.13	6284.45	6341.28	6398.7	6455.92	6511.54	6564.57	6614.91	6662.93	6708.61	6751.97	6793.07	6831.89	6868.41	6902.69	6934.82	6964.85	6992.86	7018.94	7043.32	7066.29	7088.08	7108.84	7128.6	7147.47	7165.48	7182.71	7199.24	7215.12	7230.44	7245.25	7259.61	7273.57	7287.14	7300.26	7312.91
113	High variant	Thailand		764	68657.6	68934.3	69208.5	69477.8	69740.4	69995.5	70242.7	70482.7	70716.6	70946.1	71172.4	71395.7	71614.5	71825.3	72023.5	72205.5	72370.2	72517.7	72648.1	72761.9	72859.6	72941.3	73006.6	73056.1	73090.2	73109.4	73114.4	73105.9	73085.2	73053.7	73012.9	72963.6	72907	72844.5	72777.8	72708.4	72637.3	72565.4	72493.7	72423.4	72355.2	72289.9	72228.3	72170.6	72117.1
114	High variant	Timor-Leste		626	1240.98	1268.96	1298.1	1328.28	1359.46	1391.56	1424.57	1458.49	1493.33	1529.14	1565.92	1603.67	1642.32	1681.75	1721.8	1762.35	1803.34	1844.77	1886.61	1928.88	1971.56	2014.64	2058.1	2101.97	2146.28	2191.04	2236.28	2281.99	2328.19	2374.88	2422.09	2469.8	2518.04	2566.87	2616.36	2666.57	2717.53	2769.18	2821.51	2874.45	2927.92	2981.91	3036.41	3091.36	3146.74
115	High variant	Viet Nam		704	93571.6	94646	95774.3	96941.7	98135.1	99342.9	100555	101762	102959	104138	105294	106425	107524	108589	109615	110601	111543	112445	113313	114156	114984	115799	116602	117397	118188	118978	119770	120564	121363	122167	122976	123792	124613	125438	126264	127089	127913	128733	129546	130347	131133	131901	132653	133384	134094
116	High variant	Western Asia		922	258124	263239	268380	273540	278715	283900	289092	294289	299489	304691	309894	315099	320301	325498	330686	335861	341024	346175	351315	356448	361575	366697	371816	376936	382062	387198	392346	397506	402681	407871	413079	418304	423546	428802	434071	439349	444636	449930	455224	460514	465794	471061	476315	481554	486776
117	High variant	Armenia		51	2916.95	2927.66	2938.24	2948.53	2958.41	2967.76	2976.5	2984.58	2991.95	2998.59	3004.52	3009.72	3014.18	3017.87	3020.78	3022.9	3024.24	3024.88	3024.98	3024.8	3024.49	3024.14	3023.77	3023.42	3023.12	3022.91	3022.82	3022.85	3022.98	3023.13	3023.26	3023.35	3023.39	3023.37	3023.25	3022.99	3022.58	3022.03	3021.28	3020.31	3019.12	3017.69	3016.02	3014.15	3012.08
118	High variant	Azerbaijan	9	31	9617.48	9742.29	9862.53	9978.44	10090.2	10198	10302	10402.2	10498.8	10591.8	10681.3	10767.5	10850.6	10930.9	11008.9	11084.8	11158.9	11231.3	11302.4	11372.4	11441.9	11510.8	11579.2	11647	11713.9	11779.7	11844.4	11908	11970.4	12031.5	12091.1	12149.3	12206	12261.3	12315.2	12367.7	12418.9	12468.8	12517.6	12565.4	12612.5	12659	12704.8	12750.3	12795.5
119	High variant	Bahrain		48	1371.86	1458.36	1535.03	1602.26	1660.71	1711.34	1755.41	1794.5	1830.35	1864.83	1899.61	1935.66	1973.11	2010.98	2047.62	2081.84	2113.53	2143.25	2171.25	2198.01	2223.85	2248.87	2273.02	2296.41	2319.15	2341.33	2363.05	2384.35	2405.3	2425.95	2446.32	2466.48	2486.45	2506.27	2525.97	2545.53	2565.01	2584.4	2603.7	2622.93	2642.05	2661.09	2680.03	2698.82	2717.42
120	High variant	Cyprus	10	196	1160.98	1172.49	1184.1	1195.75	1207.4	1219.03	1230.62	1242.16	1253.66	1265.13	1276.57	1288	1299.36	1310.66	1321.79	1332.74	1343.47	1354	1364.35	1374.57	1384.67	1394.67	1404.56	1414.35	1424.04	1433.65	1443.16	1452.6	1461.99	1471.34	1480.69	1490.03	1499.37	1508.67	1517.94	1527.15	1536.29	1545.37	1554.37	1563.3	1572.13	1580.87	1589.51	1598.05	1606.46
121	High variant	Georgia	11	268	3951.52	3947.05	3942.82	3938.7	3934.59	3930.41	3926.1	3921.63	3916.99	3912.2	3907.26	3902.18	3896.95	3891.52	3885.85	3879.91	3873.69	3867.26	3860.75	3854.36	3848.23	3842.42	3836.92	3831.78	3827.02	3822.65	3818.7	3815.18	3812.02	3809.14	3806.5	3804.06	3801.83	3799.81	3797.97	3796.33	3794.88	3793.61	3792.51	3791.56	3790.76	3790.1	3789.62	3789.34	3789.3
122	High variant	Iraq		368	36115.6	37215	38340.7	39491	40664.8	41861.5	43081.5	44325.5	45594.9	46891.4	48216.6	49571.1	50954.5	52364.8	53799.1	55255.5	56733.5	58234	59758.8	61310.1	62889.9	64498.7	66136.3	67803.3	69500.2	71227.4	72985.2	74773.6	76592.5	78441.7	80320.7	82229.5	84167.7	86135.1	88131	90154.9	92206.8	94286.1	96391.9	98522.6	100677	102855	105057	107283	109535
123	High variant	Israel		376	8064.55	8205.38	8347.92	8491.95	8637.27	8783.8	8931.53	9080.5	9230.87	9382.76	9536.36	9691.68	9848.66	10007	10166.3	10326.4	10487.1	10648.6	10810.9	10974.3	11139	11305	11472.3	11640.9	11811	11982.7	12155.9	12330.6	12506.8	12684.6	12863.7	13044.3	13226.1	13409.3	13593.8	13779.3	13966	14153.7	14342.3	14531.5	14721.3	14911.6	15102.2	15293.2	15484.4
124	High variant	Jordan		400	9159.3	9477.24	9743.82	9965.53	10149.2	10301.7	10430.6	10543.5	10648.1	10751.9	10861.7	10982.1	11115.4	11260.8	11415.6	11577.8	11747.9	11927.4	12115.5	12311.3	12514	12723.3	12938.6	13157.8	13378.7	13599.3	13818.7	14036.7	14253.8	14470.9	14688.3	14906.1	15123.7	15340.9	15557.6	15773.5	15988.6	16202.8	16416	16628.1	16839.1	17048.9	17257.6	17464.9	17670.7
125	High variant	Kuwait		414	3935.79	4021.92	4105.88	4187.54	4266.87	4343.96	4419.05	4492.48	4564.66	4636.1	4707.21	4778.23	4849.11	4919.49	4988.77	5056.53	5122.68	5187.4	5250.93	5313.64	5375.79	5437.44	5498.53	5559.06	5619.01	5678.35	5737.11	5795.33	5852.88	5909.67	5965.58	6020.6	6074.79	6128.24	6181.1	6233.46	6285.4	6336.94	6388.03	6438.67	6488.82	6538.53	6587.89	6637	6686.02
126	High variant	Lebanon		422	5851.48	5984.03	6067.54	6108.07	6112.05	6086.31	6038.15	5975.2	5905.35	5836.37	5774.98	5725.85	5690.8	5668.33	5654.72	5647.19	5646.04	5652.53	5665.56	5683.68	5705.6	5730.97	5759.28	5789.07	5818.6	5846.6	5872.31	5895.85	5918.03	5940.2	5963.33	5987.52	6012.45	6038.25	6065.01	6092.75	6121.5	6151.18	6181.52	6212.14	6242.73	6273.16	6303.28	6332.72	6361.02
127	High variant	Oman		512	4199.81	4457.4	4683.07	4878.55	5046.22	5189.06	5310.76	5415.63	5508.45	5594.21	5677.31	5760.74	5845.3	5929.32	6009.55	6083.77	6152.08	6216.17	6277.27	6337.07	6396.85	6457.14	6517.91	6579.1	6640.46	6701.81	6763.19	6824.89	6887.25	6950.74	7015.67	7082.12	7149.85	7218.27	7286.58	7354.11	7420.64	7486.13	7550.39	7613.27	7674.68	7734.44	7792.47	7848.68	7902.98
128	High variant	Qatar		634	2481.54	2553.74	2622.4	2687.71	2749.86	2809.13	2865.85	2920.44	2973.32	3024.93	3075.68	3125.81	3175.36	3224.1	3271.7	3317.86	3362.65	3406.18	3448.36	3488.99	3528.05	3565.48	3601.43	3636.36	3670.88	3705.42	3740.18	3775.08	3810.12	3845.14	3880.07	3914.92	3949.74	3984.47	4019.03	4053.38	4087.47	4121.28	4154.79	4187.94	4220.7	4253.07	4284.99	4316.47	4347.45
129	High variant	Saudi Arabia		682	31557.1	32283.4	32993.5	33687.1	34363.9	35024.3	35669.1	36299.4	36916.7	37522.6	38118.5	38705.2	39282.4	39848.4	40401	40938.6	41461.3	41969.7	42463.2	42941.1	43403.2	43849.4	44280.9	44701.3	45115.2	45526	45935	46342.2	46748.2	47153.2	47557.3	47960.8	48363.8	48765.2	49163.8	49558.2	49948.2	50333.2	50711.9	51082.9	51445	51797.8	52141	52474.1	52796.6
130	High variant	State of Palestine	12	275	4662.88	4795.77	4933.66	5075.92	5222.02	5371.52	5524.07	5679.39	5837.32	5997.73	6160.51	6325.51	6492.52	6661.15	6831.02	7001.85	7173.49	7345.97	7519.49	7694.39	7870.91	8049.1	8228.96	8410.64	8594.33	8780.19	8968.25	9158.54	9351.03	9545.73	9742.59	9941.59	10142.7	10345.7	10550.5	10757.1	10965.2	11174.8	11385.6	11597.5	11810.1	12023.5	12237.4	12451.9	12666.9
131	High variant	Syrian Arab Republic		760	18735	18143.9	17926.5	18042.4	18447.1	19091.3	19920.8	20877	21898.2	22923	23897.8	24786.4	25577.1	26286.4	26949.6	27592.8	28214.1	28801.6	29362.1	29904.1	30434.4	30956.3	31470.9	31979.4	32482.7	32981.1	33476.5	33969.8	34460.4	34946.6	35427.4	35902.8	36373.6	36840.2	37303.4	37763.6	38220.9	38675.4	39127.4	39577.2	40025	40470.9	40914.7	41356.4	41795.6
132	High variant	Turkey		792	78271.5	79943.6	81387.5	82629	83695.9	84617.2	85424.3	86150	86827.9	87491.5	88169.1	88880.7	89633.3	90419.4	91222.2	92028.4	92840.5	93663.3	94488.2	95303.7	96101.3	96877.5	97633.6	98371.8	99096.5	99810.9	100515	101208	101892	102568	103237	103901	104558	105211	105860	106506	107149	107788	108421	109048	109665	110272	110869	111455	112029
133	High variant	United Arab Emirates		784	9154.3	9298.44	9443.12	9587.81	9732.18	9876.13	10019.8	10163.6	10308.2	10454.1	10602	10752.1	10904.2	11057.4	11210.3	11362.1	11512.5	11661.6	11809.8	11957.8	12106.1	12254.7	12403.4	12551.8	12699.7	12846.7	12992.8	13137.9	13282	13424.7	13565.9	13705.7	13843.9	13980.6	14116	14250.2	14383.2	14515.1	14645.8	14775.3	14903.9	15031.5	15158.1	15283.9	15408.8
134	High variant	Yemen		887	26916.2	27611.1	28321.2	29043.7	29776.4	30517.5	31265.9	32021.1	32782.9	33551.7	34327.5	35110.1	35898.1	36689.3	37480.7	38270.2	39056.6	39840	40621.7	41403.5	42186.8	42971.5	43757	44542.7	45327.8	46111.7	46894.1	47674.5	48453	49229.3	50003.1	50774.2	51541.7	52304.8	53062.1	53812.7	54555.9	55291.3	56018.2	56735.9	57444	58142	58829.6	59506.2	60171.6
135	High variant	EUROPE		908	740814	742453	744155	745884	747611	749314	750984	752617	754219	755801	757372	758934	760477	761972	763383	764687	765875	766962	767969	768932	769879	770819	771755	772702	773673	774681	775733	776838	778005	779242	780556	781952	783431	784989	786622	788325	790098	791939	793838	795783	797765	799782	801834	803917	806026
136	High variant	Eastern Europe		923	293244	293211	293216	293238	293262	293273	293261	293219	293143	293029	292876	292684	292449	292167	291833	291447	291007	290523	290010	289492	288988	288505	288046	287623	287243	286916	286646	286436	286287	286199	286170	286202	286292	286435	286625	286855	287123	287424	287750	288093	288443	288798	289158	289516	289871
137	High variant	Belarus		112	9485.77	9484.81	9486.03	9488.76	9492.44	9496.51	9500.51	9504.06	9506.82	9508.53	9508.96	9507.99	9505.53	9501.56	9496.12	9489.31	9481.16	9471.88	9462	9452.23	9443.16	9435.06	9428.02	9422.37	9418.4	9416.34	9416.37	9418.53	9422.87	9429.33	9437.89	9448.52	9461.15	9475.59	9491.57	9508.83	9527.28	9546.81	9567.15	9587.99	9609.09	9630.34	9651.71	9673.16	9694.65
138	High variant	Bulgaria		100	7177.4	7137.02	7098.77	7062.09	7026.53	6991.66	6957.19	6922.89	6888.55	6854.09	6819.43	6784.44	6749.06	6713.09	6676.35	6638.75	6600.27	6561.02	6521.38	6481.89	6442.97	6404.76	6367.31	6330.8	6295.44	6261.34	6228.64	6197.37	6167.55	6139.15	6112.12	6086.46	6062.18	6039.21	6017.48	5996.91	5977.44	5959.04	5941.51	5924.69	5908.39	5892.58	5877.24	5862.28	5847.61
139	High variant	Czechia		203	10603.8	10623.9	10646.4	10670.2	10694.6	10718.8	10742.3	10764.6	10785.5	10804.6	10822	10837.5	10850.9	10861.9	10870.5	10876.3	10879.5	10880.3	10879.5	10878.1	10877.1	10876.6	10877	10878.4	10881.3	10885.8	10892.2	10900.6	10911	10923.3	10937.6	10953.8	10971.8	10991.4	11012.5	11034.6	11057.7	11081.7	11106.1	11130.4	11154.2	11177.4	11199.9	11221.5	11242
140	High variant	Hungary		348	9783.92	9762.96	9744.65	9728.27	9713.21	9699	9685.33	9672.01	9658.97	9646.23	9633.8	9621.58	9609.3	9596.45	9582.4	9566.7	9549.17	9529.95	9509.26	9487.5	9464.99	9441.87	9418.2	9394.23	9370.26	9346.54	9323.25	9300.55	9278.72	9258.05	9238.79	9221.06	9204.91	9190.45	9177.8	9166.95	9157.98	9150.81	9145.23	9140.98	9137.82	9135.67	9134.45	9133.95	9133.89
141	High variant	Poland		616	38265.2	38269.1	38274	38277.7	38278.5	38275.2	38267	38253.4	38234.5	38210.7	38182.2	38149	38110.5	38065.2	38011.6	37948.4	37875.3	37793	37702.8	37606.3	37505.2	37400.1	37291.2	37179.4	37065.6	36950.6	36834.8	36719	36604.1	36490.9	36380.3	36272.6	36168	36066.8	35969.4	35875.7	35785.9	35699.8	35616.6	35535.5	35455.8	35377.3	35299.6	35221.7	35142.4
142	High variant	Republic of Moldova	13	498	4065.98	4063.98	4062.51	4061.24	4059.85	4058.14	4055.91	4053.04	4049.47	4045.21	4040.21	4034.45	4027.83	4020.18	4011.3	4001.09	3989.49	3976.59	3962.6	3947.79	3932.41	3916.53	3900.22	3883.64	3866.97	3850.36	3833.91	3817.67	3801.69	3786.05	3770.74	3755.83	3741.3	3727.14	3713.31	3699.76	3686.47	3673.41	3660.49	3647.61	3634.67	3621.64	3608.51	3595.19	3581.6
143	High variant	Romania		642	19876.6	19795.5	19722.7	19656.5	19595.8	19539.3	19486.3	19436.3	19388.9	19343.8	19301	19260	19220.2	19180.7	19140.1	19097.8	19053.2	19006.4	18957.8	18908.2	18858.2	18808	18757.4	18706.6	18655.8	18605.1	18554.7	18504.8	18455.9	18408.5	18362.9	18319.4	18278	18238.8	18202.2	18168.2	18136.9	18108.2	18081.8	18057.2	18034	18012	17991.5	17972	17953.5
144	High variant	Russian Federation		643	143888	144133	144379	144618	144843	145048	145229	145383	145509	145605	145673	145711	145722	145704	145658	145584	145485	145365	145236	145111	145001	144911	144844	144806	144803	144840	144921	145046	145215	145425	145674	145962	146287	146645	147030	147436	147861	148303	148757	149217	149679	150142	150604	151064	151520
145	High variant	Slovakia		703	5439.32	5449.28	5460.8	5473.31	5486.27	5499.28	5512	5524.18	5535.62	5546.21	5555.85	5564.41	5571.73	5577.55	5581.64	5583.8	5583.97	5582.26	5578.95	5574.41	5568.97	5562.78	5555.93	5548.63	5541.18	5533.78	5526.57	5519.68	5513.26	5507.45	5502.4	5498.17	5494.77	5492.22	5490.52	5489.63	5489.54	5490.18	5491.39	5492.95	5494.65	5496.48	5498.32	5500.03	5501.42
146	High variant	Ukraine	14	804	44657.7	44492.2	44341.6	44202.5	44071.8	43946.9	43825.5	43705.5	43585.5	43464	43340.1	43212.8	43081.7	42946	42805.6	42660.4	42510.2	42355.7	42199.5	42044.6	41893.7	41747.8	41607.2	41472.8	41345.4	41225.7	41114.2	41011.2	40916.9	40831	40753.3	40683.9	40622.4	40568.3	40520.7	40478.9	40442.4	40410.9	40383.3	40358.4	40335.2	40313.5	40292.9	40273.1	40253.6
147	High variant	Northern Europe		924	103097	103766	104469	105197	105943	106703	107470	108243	109020	109800	110583	111366	112147	112923	113686	114434	115165	115880	116583	117278	117972	118664	119356	120049	120748	121454	122169	122894	123631	124382	125149	125933	126733	127549	128377	129217	130067	130929	131798	132673	133552	134434	135319	136207	137097
148	High variant	Channel Islands	15	830	163.758	164.714	165.705	166.733	167.787	168.858	169.946	171.035	172.149	173.256	174.384	175.524	176.667	177.791	178.91	180.002	181.069	182.108	183.114	184.104	185.063	186.002	186.913	187.806	188.685	189.54	190.374	191.197	192.011	192.832	193.645	194.471	195.303	196.138	196.982	197.837	198.694	199.568	200.444	201.339	202.239	203.156	204.091	205.03	205.975
149	High variant	Denmark		208	5688.69	5713.94	5742.22	5772.99	5805.75	5840.14	5875.87	5912.78	5950.79	5989.84	6029.91	6070.87	6112.44	6154.14	6195.43	6235.87	6275.27	6313.63	6350.99	6387.48	6423.18	6458.14	6492.37	6525.99	6559.16	6592.04	6624.73	6657.35	6690.21	6723.65	6757.95	6793.24	6829.59	6867.13	6905.94	6946.1	6987.67	7030.66	7074.99	7120.53	7167.19	7214.9	7263.64	7313.31	7363.78
150	High variant	Estonia		233	1315.32	1314.24	1313.34	1312.54	1311.79	1311.04	1310.24	1309.35	1308.33	1307.14	1305.76	1304.17	1302.38	1300.39	1298.23	1295.92	1293.47	1290.89	1288.26	1285.67	1283.19	1280.84	1278.65	1276.59	1274.7	1272.95	1271.36	1269.94	1268.67	1267.54	1266.53	1265.63	1264.86	1264.18	1263.62	1263.16	1262.77	1262.48	1262.26	1262.07	1261.9	1261.76	1261.63	1261.51	1261.38
151	High variant	Faeroe Islands		234	48.965	49.184	49.427	49.679	49.942	50.222	50.522	50.822	51.14	51.469	51.822	52.182	52.557	52.948	53.341	53.734	54.129	54.518	54.897	55.285	55.653	56.017	56.369	56.715	57.05	57.373	57.697	58.013	58.32	58.629	58.933	59.236	59.532	59.835	60.157	60.462	60.789	61.116	61.465	61.817	62.175	62.546	62.932	63.321	63.725
152	High variant	Finland	16	246	5481.97	5506.9	5533.86	5562.32	5591.86	5622.15	5652.92	5683.99	5715.25	5746.64	5778.11	5809.58	5840.84	5871.57	5901.45	5930.19	5957.68	5984.01	6009.29	6033.73	6057.54	6080.77	6103.53	6126	6148.48	6171.18	6194.22	6217.74	6241.97	6267.18	6293.54	6321.21	6350.19	6380.5	6412.09	6444.92	6478.99	6514.3	6550.75	6588.2	6626.57	6665.76	6705.75	6746.45	6787.73
153	High variant	Iceland		352	330.243	333.254	336.373	339.565	342.818	346.098	349.409	352.723	356.042	359.372	362.692	366.012	369.316	372.57	375.776	378.903	381.934	384.885	387.752	390.547	393.273	395.947	398.551	401.097	403.599	406.054	408.481	410.874	413.241	415.596	417.943	420.288	422.636	425	427.358	429.74	432.134	434.543	436.965	439.405	441.865	444.337	446.829	449.323	451.832
154	High variant	Ireland		372	4700.11	4744.51	4789.63	4835.42	4881.8	4928.64	4975.82	5023.18	5070.55	5117.75	5164.63	5211.11	5257.23	5303.12	5348.97	5395	5441.19	5487.56	5534.22	5581.32	5628.98	5677.24	5726.04	5775.31	5824.9	5874.71	5924.68	5974.78	6024.92	6074.95	6124.81	6174.43	6223.77	6272.72	6321.22	6369.16	6416.54	6463.36	6509.65	6555.46	6600.84	6645.83	6690.47	6734.85	6779.1
155	High variant	Isle of Man		833	83.167	83.811	84.472	85.139	85.817	86.516	87.209	87.909	88.621	89.335	90.066	90.796	91.524	92.257	92.99	93.704	94.419	95.122	95.816	96.496	97.16	97.817	98.463	99.103	99.73	100.361	100.998	101.626	102.25	102.881	103.508	104.128	104.76	105.388	106.032	106.687	107.355	108.038	108.744	109.455	110.167	110.895	111.626	112.363	113.114
156	High variant	Latvia		428	1992.66	1972.63	1954.51	1937.96	1922.65	1908.37	1894.97	1882.38	1870.59	1859.63	1849.55	1840.29	1831.73	1823.58	1815.47	1807.16	1798.53	1789.63	1780.64	1771.82	1763.4	1755.39	1747.76	1740.52	1733.65	1727.17	1721.09	1715.4	1710.1	1705.13	1700.45	1696.06	1691.94	1688.11	1684.55	1681.25	1678.21	1675.42	1672.83	1670.43	1668.18	1666.07	1664.1	1662.25	1660.52
157	High variant	Lithuania		440	2931.93	2916.39	2903.4	2892.49	2883.28	2875.43	2868.58	2862.46	2856.82	2851.46	2846.18	2840.82	2835.23	2829.27	2822.82	2815.8	2808.14	2799.85	2791.06	2781.95	2772.68	2763.31	2753.89	2744.51	2735.37	2726.57	2718.18	2710.27	2702.91	2696.15	2690.08	2684.7	2680.05	2676.13	2672.94	2670.47	2668.72	2667.66	2667.2	2667.24	2667.67	2668.48	2669.62	2671.02	2672.56
158	High variant	Norway	17	578	5199.84	5253.65	5310.4	5369.55	5430.64	5493.32	5557.32	5622.44	5688.56	5755.62	5823.55	5892.23	5961.41	6030.67	6099.56	6167.69	6234.93	6301.26	6366.72	6431.41	6495.44	6558.81	6621.56	6683.86	6745.88	6807.84	6869.79	6931.83	6994.24	7057.32	7121.34	7186.38	7252.47	7319.53	7387.45	7456.15	7525.59	7595.81	7666.68	7738.11	7810	7882.29	7954.96	8027.92	8101.06
159	High variant	Sweden		752	9763.57	9847.69	9934.47	10022.9	10112	10201.3	10290.4	10379.2	10467.8	10556.3	10645.1	10734	10822.8	10910.7	10996.7	11080.2	11161	11239.3	11315.7	11391.2	11466.4	11541.5	11616.6	11692.3	11769	11847.2	11927.1	12008.9	12092.9	12179.3	12268.4	12360.4	12455.1	12552.3	12651.7	12753	12855.9	12960.5	13066.4	13173.2	13280.7	13388.7	13497.2	13605.9	13714.7
160	High variant	United Kingdom		826	65397.1	65865.4	66351.3	66849.8	67357.3	67870.4	68386.9	68904.9	69423.6	69942.4	70460.9	70978.3	71493.3	72003.5	72506.2	72999.6	73482.9	73956.9	74424.1	74887.5	75349.9	75812.2	76274.8	76739.4	77207.6	77681	78160.2	78645.8	79139	79640.9	80152	80672.8	81202.9	81741.5	82286.9	82837.8	83394	83955.1	84519.7	85086.1	85652.9	86219.7	86786.7	87353.9	87921.8
161	High variant	Southern Europe		925	152441	152471	152515	152566	152621	152677	152735	152796	152863	152940	153029	153132	153246	153363	153475	153573	153656	153723	153778	153822	153860	153890	153912	153925	153929	153925	153911	153889	153859	153822	153779	153729	153674	153614	153550	153482	153412	153340	153267	153193	153121	153050	152982	152917	152858
162	High variant	Albania		8	2923.35	2930.89	2939.29	2948.24	2957.48	2966.79	2976.04	2985.1	2993.93	3002.53	3010.85	3018.85	3026.38	3033.2	3039.04	3043.67	3047.01	3049.1	3049.96	3049.65	3048.26	3045.81	3042.34	3038.01	3032.97	3027.43	3021.43	3015.05	3008.44	3001.73	2995.04	2988.45	2982	2975.76	2969.79	2964.11	2958.76	2953.76	2949.03	2944.47	2940.04	2935.69	2931.43	2927.16	2922.84
163	High variant	Andorra		20	78.014	77.752	77.612	77.59	77.655	77.816	78.045	78.314	78.623	78.938	79.252	79.558	79.832	80.101	80.359	80.625	80.894	81.165	81.426	81.683	81.939	82.191	82.442	82.679	82.903	83.116	83.313	83.487	83.642	83.787	83.897	83.994	84.071	84.111	84.138	84.143	84.126	84.093	84.043	83.968	83.885	83.799	83.687	83.582	83.467
164	High variant	Bosnia and Herzegovina		70	3535.96	3532.03	3529.53	3528.1	3527.44	3527.31	3527.55	3528.01	3528.64	3529.41	3530.3	3531.21	3531.99	3532.38	3532.04	3530.75	3528.4	3525.02	3520.63	3515.31	3509.14	3502.15	3494.38	3485.97	3477.08	3467.87	3458.43	3448.83	3439.3	3430	3421.14	3412.8	3405.02	3397.9	3391.51	3385.91	3381.14	3377.17	3373.92	3371.28	3369.15	3367.49	3366.25	3365.3	3364.46
165	High variant	Croatia		191	4236.02	4215.93	4197.31	4179.97	4163.7	4148.35	4133.83	4120.06	4107.01	4094.68	4083.02	4072.01	4061.51	4051.34	4041.26	4031.1	4020.76	4010.25	3999.54	3988.68	3977.66	3966.47	3955.14	3943.73	3932.35	3921.09	3910	3899.08	3888.44	3878.11	3868.17	3858.66	3849.57	3840.97	3832.88	3825.32	3818.31	3811.83	3805.86	3800.31	3795.16	3790.37	3785.93	3781.8	3777.9
166	High variant	Gibraltar		292	34.228	34.446	34.658	34.869	35.071	35.259	35.454	35.644	35.818	35.998	36.178	36.36	36.543	36.723	36.899	37.075	37.248	37.416	37.586	37.754	37.919	38.079	38.248	38.418	38.584	38.758	38.935	39.114	39.302	39.486	39.682	39.877	40.07	40.276	40.478	40.685	40.897	41.108	41.323	41.541	41.759	41.973	42.198	42.403	42.629
167	High variant	Greece		300	11217.8	11213	11207.5	11201.2	11194.2	11186.8	11179.1	11171.4	11164	11157.4	11151.7	11147.1	11143.6	11140.9	11138.4	11135.7	11132.9	11129.7	11126.4	11122.7	11118.8	11114.5	11109.8	11104.4	11098	11090.5	11081.7	11071.7	11060.4	11047.7	11033.6	11018.1	11001.2	10983.1	10964.1	10944.2	10923.7	10902.6	10881	10859.1	10837	10814.9	10792.8	10770.9	10749.4
168	High variant	Holy See	18	336	0.803	0.801	0.796	0.804	0.802	0.805	0.807	0.806	0.806	0.815	0.809	0.808	0.811	0.812	0.818	0.814	0.826	0.83	0.826	0.826	0.822	0.824	0.837	0.834	0.839	0.838	0.841	0.845	0.849	0.853	0.852	0.852	0.853	0.856	0.864	0.872	0.875	0.874	0.876	0.884	0.883	0.892	0.893	0.895	0.893
169	High variant	Italy		380	59504.2	59504.3	59509.2	59516.9	59526.3	59536.8	59548.7	59562.9	59580.9	59604.7	59635.8	59674.6	59720.1	59769.2	59817.8	59862.6	59902.5	59937.9	59969.4	59998	60024.7	60049.4	60071.5	60090.9	60107.2	60120.3	60130.2	60137.2	60141.6	60143.7	60143.9	60142.6	60139.9	60136.3	60131.9	60127.1	60122.4	60118.2	60115.2	60113.8	60114.8	60118.8	60126.3	60138.3	60155.5
170	High variant	Malta		470	427.616	429.447	431.464	433.586	435.78	437.986	440.175	442.313	444.386	446.364	448.267	450.062	451.737	453.256	454.589	455.712	456.612	457.301	457.81	458.181	458.448	458.624	458.723	458.755	458.756	458.743	458.717	458.711	458.732	458.818	458.974	459.23	459.572	460.024	460.57	461.226	461.982	462.852	463.805	464.826	465.905	467.029	468.189	469.375	470.548
171	High variant	Montenegro		499	628.178	629.353	630.617	631.939	633.299	634.674	636.047	637.42	638.777	640.137	641.508	642.879	644.223	645.52	646.732	647.82	648.781	649.609	650.313	650.906	651.391	651.771	652.044	652.23	652.352	652.398	652.404	652.358	652.297	652.244	652.227	652.249	652.317	652.451	652.659	652.945	653.325	653.783	654.319	654.914	655.569	656.27	657.021	657.791	658.583
172	High variant	Portugal		620	10418.5	10385.9	10358	10334.2	10313.9	10296.6	10281.9	10269.3	10258.4	10249.1	10240.9	10233.7	10227.1	10220.7	10214.1	10206.9	10199.1	10190.3	10180.7	10170.2	10159	10147	10134.1	10120.2	10105.2	10089	10071.6	10053.1	10033.5	10013.2	9992.23	9970.72	9948.71	9926.36	9903.78	9881.11	9858.45	9835.88	9813.54	9791.55	9770.02	9749.06	9728.72	9709.01	9689.94
173	High variant	San Marino		674	32.96	33.206	33.434	33.665	33.878	34.083	34.279	34.472	34.656	34.847	35.026	35.207	35.387	35.558	35.727	35.884	36.039	36.182	36.317	36.441	36.566	36.678	36.788	36.892	36.993	37.084	37.179	37.261	37.342	37.424	37.507	37.584	37.667	37.748	37.83	37.919	38.007	38.094	38.191	38.288	38.39	38.5	38.612	38.716	38.828
174	High variant	Serbia	19	688	8851.28	8831.9	8815.14	8800.34	8787	8774.67	8763.02	8751.81	8740.9	8730.2	8719.66	8709.13	8698.35	8686.95	8674.44	8660.5	8644.99	8627.96	8609.56	8590	8569.52	8548.19	8526.11	8503.54	8480.76	8458.06	8435.58	8413.53	8392.2	8372.01	8353.28	8336.12	8320.6	8306.82	8294.85	8284.73	8276.49	8270.06	8265.19	8261.55	8258.87	8257.01	8255.94	8255.43	8255.24
175	High variant	Slovenia		705	2074.79	2079.66	2084.47	2089.15	2093.62	2097.86	2101.8	2105.46	2108.8	2111.82	2114.55	2116.97	2119.09	2120.86	2122.26	2123.3	2123.95	2124.26	2124.31	2124.17	2123.93	2123.63	2123.28	2122.92	2122.57	2122.25	2122	2121.83	2121.76	2121.82	2122.01	2122.34	2122.82	2123.44	2124.18	2125.04	2126	2127.07	2128.22	2129.43	2130.68	2131.95	2133.27	2134.61	2135.98
176	High variant	Spain	20	724	46397.7	46488.9	46576.8	46660.5	46739.7	46814.5	46885.6	46954.6	47023	47092.9	47166.1	47243.4	47324.4	47406.9	47487.9	47565.2	47638	47706.9	47772.8	47837.2	47901.2	47964.7	48027.2	48088.1	48146.8	48202.9	48256	48306	48352.2	48393.6	48429.6	48460	48484.7	48503.4	48516	48522.2	48522.3	48516.4	48505	48488.8	48468.5	48444.6	48417.6	48388.1	48356.7
177	High variant	TFYR Macedonia	21	807	2079.31	2083.92	2089.16	2094.83	2100.74	2106.76	2112.77	2118.67	2124.41	2129.95	2135.26	2140.27	2144.93	2149.12	2152.71	2155.63	2157.82	2159.34	2160.21	2160.52	2160.37	2159.78	2158.8	2157.49	2155.98	2154.36	2152.66	2150.94	2149.3	2147.82	2146.58	2145.6	2144.92	2144.55	2144.49	2144.75	2145.33	2146.22	2147.34	2148.61	2149.96	2151.34	2152.75	2154.14	2155.44
178	High variant	Western Europe		926	192032	193003	193955	194883	195785	196662	197517	198358	199193	200032	200884	201753	202635	203519	204389	205233	206048	206836	207599	208339	209059	209760	210441	211105	211753	212386	213008	213620	214228	214839	215458	216088	216731	217391	218070	218771	219496	220247	221023	221824	222649	223500	224376	225276	226199
179	High variant	Austria		40	8678.66	8707.21	8739.76	8775.33	8813.11	8852.44	8892.78	8933.75	8975.1	9016.67	9058.33	9099.84	9140.83	9180.72	9218.84	9254.7	9288.05	9318.98	9347.74	9374.75	9400.36	9424.68	9447.73	9469.76	9491.07	9511.89	9532.37	9552.66	9572.94	9593.45	9614.34	9635.76	9657.75	9680.33	9703.48	9727.16	9751.42	9776.29	9801.74	9827.75	9854.27	9881.31	9908.87	9936.97	9965.63
180	High variant	Belgium		56	11287.9	11382.7	11472.1	11556.3	11635.6	11710.4	11781.5	11850	11917.2	11984.2	12052.3	12122.2	12193.7	12266.1	12337.8	12407.9	12476.2	12543.2	12608.9	12673.7	12737.8	12801.3	12864.3	12926.8	12989	13051	13113	13175	13237.4	13300.4	13364.4	13429.4	13495.4	13562.6	13631.1	13700.8	13771.7	13844.1	13917.6	13992.3	14068.1	14145	14222.8	14301.7	14381.4
181	High variant	France		250	64457.2	64791.4	65134.4	65484.4	65840.3	66201.1	66566.8	66937.5	67314	67697.2	68087.7	68485.5	68889.4	69296.6	69703.8	70108.3	70508.9	70905.7	71298	71685.5	72067.9	72445.2	72817.3	73184.4	73546.5	73904.1	74257.5	74607.8	74956.8	75307.4	75661.7	76020.5	76384.5	76755.3	77134.4	77523	77922.1	78331.7	78751.4	79180.1	79616.9	80062	80515.4	80976.9	81446
182	High variant	Germany		276	81707.8	82063.8	82386.2	82674.8	82931.2	83158.1	83360.4	83544.1	83716.5	83885.5	84058.2	84238.4	84425.6	84614.3	84795.4	84962.7	85114.8	85254.2	85382.1	85500.6	85611.5	85715.3	85811.9	85901.7	85985	86062.5	86134.8	86203.2	86269.3	86334.9	86402	86471.4	86544.4	86622.2	86706.3	86798.2	86898.6	87008.4	87128.5	87259.9	87403.3	87559.1	87727.5	87908.4	88101.5
183	High variant	Liechtenstein		438	37.403	37.685	37.979	38.291	38.611	38.931	39.266	39.594	39.926	40.263	40.608	40.946	41.294	41.63	41.968	42.289	42.6	42.906	43.195	43.474	43.74	43.997	44.248	44.483	44.713	44.941	45.157	45.372	45.575	45.792	46.002	46.216	46.438	46.665	46.894	47.128	47.371	47.613	47.872	48.129	48.393	48.668	48.948	49.232	49.513
184	High variant	Luxembourg		442	566.741	574.643	582.848	591.366	600.149	609.183	618.404	627.732	637.096	646.415	655.613	664.645	673.52	682.28	690.998	699.739	708.509	717.296	726.058	734.791	743.475	752.098	760.675	769.213	777.715	786.186	794.631	803.054	811.489	819.957	828.482	837.084	845.766	854.519	863.338	872.232	881.192	890.218	899.307	908.471	917.701	926.999	936.356	945.773	955.243
185	High variant	Monaco		492	38.307	38.54	38.78	39.023	39.276	39.528	39.788	40.054	40.34	40.616	40.918	41.219	41.534	41.857	42.194	42.527	42.856	43.188	43.528	43.866	44.199	44.527	44.85	45.174	45.497	45.813	46.133	46.46	46.786	47.116	47.467	47.823	48.201	48.582	48.981	49.397	49.819	50.248	50.697	51.166	51.631	52.116	52.605	53.107	53.617
186	High variant	Netherlands		528	16938.5	17001.8	17071.9	17147.4	17227.2	17310.2	17395.7	17483	17571.6	17661.3	17751.6	17842.2	17932.3	18021	18107.1	18189.7	18268.5	18343.2	18413.9	18480.5	18543.1	18601.8	18656.7	18708	18756.4	18802.2	18845.7	18887.3	18928	18968.8	19010.5	19053.6	19098.3	19145.1	19194.3	19246.1	19300.9	19358.8	19419.5	19482.9	19548.7	19616.9	19687.5	19760.4	19835.3
187	High variant	Switzerland		756	8319.77	8405.68	8491.2	8575.88	8659.39	8741.59	8822.51	8902.34	8981.4	9060.1	9138.8	9217.63	9296.39	9374.45	9450.99	9525.4	9597.49	9667.49	9735.56	9802.03	9867.17	9931.08	9993.81	10055.6	10116.9	10177.8	10238.4	10299.1	10359.9	10421.3	10483.5	10546.6	10610.6	10675.5	10740.9	10806.7	10872.8	10939.3	11006.1	11073.2	11140.5	11207.9	11275.5	11343.2	11411.1
188	High variant	LATIN AMERICA AND THE CARIBBEAN		904	632381	639851	647485	655230	663042	670887	678741	686590	694427	702253	710066	717860	725611	733282	740824	748203	755404	762431	769301	776042	782677	789208	795635	801969	808219	814395	820505	826552	832545	838491	844397	850265	856098	861895	867658	873385	879076	884729	890335	895884	901366	906779	912120	917386	922568
189	High variant	Caribbean		915	43309.6	43645.6	43994.6	44352.7	44716.5	45083.7	45452.4	45821.9	46191.8	46562.3	46933.5	47304.9	47674.7	48039.8	48396.4	48741.7	49074.4	49394.8	49704.2	50004.4	50297.1	50582.6	50860.5	51131.6	51396.8	51656.6	51911.6	52162	52408.3	52650.6	52889.4	53124.7	53356.8	53586.2	53813.2	54038.2	54261.3	54482.4	54701	54916.5	55128.1	55336	55540.2	55740.3	55936.2
190	High variant	Anguilla		660	14.611	14.809	14.974	15.133	15.289	15.427	15.554	15.675	15.788	15.894	16.006	16.109	16.213	16.314	16.41	16.495	16.581	16.656	16.728	16.797	16.86	16.916	16.977	17.027	17.078	17.121	17.168	17.211	17.252	17.288	17.33	17.365	17.4	17.436	17.467	17.498	17.532	17.562	17.594	17.63	17.662	17.695	17.73	17.758	17.787
191	High variant	Antigua and Barbuda		28	99.923	101.082	102.299	103.539	104.817	106.114	107.421	108.742	110.064	111.399	112.738	114.079	115.413	116.743	118.05	119.322	120.568	121.787	122.968	124.122	125.244	126.353	127.422	128.477	129.504	130.524	131.509	132.486	133.448	134.403	135.352	136.299	137.224	138.157	139.086	140.021	140.952	141.875	142.799	143.73	144.654	145.575	146.498	147.429	148.345
192	High variant	Aruba		533	104.341	104.888	105.463	106.042	106.632	107.232	107.834	108.425	109.026	109.637	110.262	110.88	111.512	112.125	112.724	113.293	113.814	114.319	114.776	115.189	115.566	115.902	116.198	116.45	116.681	116.869	117.028	117.161	117.283	117.397	117.502	117.611	117.727	117.858	118.019	118.199	118.418	118.667	118.96	119.28	119.634	120.02	120.451	120.905	121.384
193	High variant	Bahamas		44	386.838	391.449	396.188	401.009	405.878	410.774	415.667	420.537	425.388	430.201	434.989	439.733	444.421	449.024	453.507	457.843	462.026	466.061	469.956	473.737	477.394	480.97	484.444	487.848	491.182	494.494	497.776	501.027	504.283	507.544	510.817	514.107	517.419	520.767	524.124	527.488	530.864	534.257	537.655	541.057	544.447	547.842	551.216	554.583	557.925
194	High variant	Barbados		52	284.217	285.292	286.414	287.569	288.722	289.888	291.045	292.174	293.291	294.391	295.473	296.531	297.565	298.557	299.493	300.355	301.167	301.896	302.578	303.204	303.775	304.312	304.799	305.264	305.702	306.12	306.533	306.937	307.356	307.775	308.219	308.7	309.203	309.75	310.328	310.962	311.645	312.39	313.167	314.002	314.881	315.812	316.776	317.791	318.843
195	High variant	British Virgin Islands		92	30.113	30.774	31.378	31.938	32.448	32.916	33.355	33.753	34.134	34.498	34.858	35.21	35.574	35.923	36.264	36.588	36.902	37.198	37.485	37.759	38.03	38.284	38.537	38.77	39.014	39.24	39.464	39.691	39.912	40.131	40.343	40.571	40.789	41.006	41.227	41.445	41.665	41.889	42.105	42.322	42.527	42.747	42.958	43.164	43.365
196	High variant	Caribbean Netherlands	22	535	24.57	25.01	25.406	25.775	26.108	26.421	26.704	26.976	27.223	27.469	27.714	27.957	28.203	28.444	28.688	28.918	29.142	29.357	29.574	29.771	29.979	30.18	30.371	30.564	30.753	30.939	31.141	31.324	31.51	31.704	31.895	32.086	32.287	32.481	32.69	32.893	33.093	33.299	33.511	33.723	33.938	34.152	34.364	34.569	34.791
197	High variant	Cayman Islands		136	59.963	60.832	61.714	62.597	63.497	64.399	65.306	66.213	67.127	68.044	68.961	69.879	70.802	71.721	72.631	73.539	74.43	75.302	76.167	77.027	77.875	78.707	79.528	80.346	81.147	81.939	82.713	83.491	84.257	85.02	85.777	86.54	87.299	88.07	88.839	89.608	90.387	91.175	91.957	92.768	93.576	94.405	95.242	96.101	96.974
198	High variant	Cuba		192	11461.4	11479.3	11501.7	11527.3	11555	11584.1	11613.9	11644.2	11674.7	11705.5	11736.5	11767.7	11798.3	11827.6	11854.2	11877.6	11897.1	11913.1	11925.8	11935.9	11944	11950.1	11954.3	11956.8	11957.9	11958	11957.1	11955.3	11952.9	11949.9	11946.4	11942.5	11938.2	11933.6	11928.4	11922.6	11916.3	11909.4	11901.9	11893.8	11885	11875.6	11865.7	11855.2	11844.1
199	High variant	Curaçao		531	158.01	159.318	160.648	162.003	163.37	164.724	166.083	167.438	168.789	170.126	171.47	172.792	174.113	175.405	176.676	177.909	179.111	180.268	181.39	182.495	183.571	184.626	185.662	186.689	187.702	188.71	189.721	190.734	191.753	192.788	193.845	194.921	196.019	197.144	198.279	199.443	200.617	201.814	203.028	204.259	205.506	206.769	208.046	209.335	210.642
200	High variant	Dominica		212	73.162	73.628	74.132	74.672	75.222	75.787	76.341	76.906	77.459	78	78.52	79.023	79.507	79.964	80.387	80.779	81.132	81.452	81.746	82.015	82.269	82.51	82.736	82.959	83.175	83.396	83.609	83.836	84.061	84.286	84.523	84.76	85.002	85.253	85.487	85.737	85.973	86.206	86.441	86.66	86.86	87.06	87.239	87.402	87.557
201	High variant	Dominican Republic		214	10528.4	10662.3	10799	10937.6	11077.3	11217.6	11358.1	11498.6	11639.2	11779.9	11920.8	12061.9	12202.8	12342.7	12480.8	12616.3	12749	12879	13006.8	13133	13258.3	13382.6	13506	13628.2	13749.2	13868.9	13987.3	14104.5	14220.5	14335.3	14449.1	14561.7	14673.3	14783.8	14893.5	15002.2	15110.2	15217.4	15323.6	15428.8	15533	15636	15737.9	15838.6	15938.4
202	High variant	Grenada		308	106.823	107.514	108.226	108.969	109.719	110.48	111.241	111.996	112.732	113.445	114.115	114.759	115.364	115.928	116.466	116.974	117.455	117.913	118.344	118.755	119.153	119.539	119.906	120.264	120.617	120.964	121.31	121.658	121.995	122.326	122.653	122.969	123.276	123.566	123.85	124.112	124.358	124.586	124.801	124.984	125.142	125.271	125.372	125.444	125.493
203	High variant	Guadeloupe	23	312	450.418	450.375	450.513	450.762	451.12	451.573	452.12	452.773	453.558	454.498	455.625	456.941	458.403	459.956	461.516	463.013	464.428	465.749	466.959	468.052	469.012	469.831	470.512	471.045	471.443	471.703	471.843	471.851	471.768	471.587	471.352	471.066	470.748	470.407	470.082	469.789	469.549	469.367	469.247	469.214	469.271	469.413	469.662	470.002	470.434
204	High variant	Haiti		332	10711.1	10859.4	11011.3	11165.7	11322.1	11479.7	11638.1	11797.2	11956.7	12116.8	12277.3	12438.1	12598.7	12758.5	12916.6	13072.1	13224.9	13375	13522.5	13667.7	13811	13952.4	14091.7	14229.2	14365.1	14499.7	14633.2	14765.3	14896.3	15025.9	15154.1	15280.9	15406.3	15530.4	15653.6	15776	15897.5	16018.1	16137.5	16255.2	16371.1	16485	16597	16706.9	16814.6
205	High variant	Jamaica		388	2871.93	2885.51	2899.56	2913.87	2928.22	2942.46	2956.47	2970.14	2983.39	2996.2	3008.49	3020.2	3031.25	3041.5	3050.78	3058.97	3066.05	3072.01	3076.86	3080.64	3083.38	3085.1	3085.85	3085.77	3085.02	3083.76	3082.07	3079.97	3077.54	3074.8	3071.81	3068.62	3065.25	3061.75	3058.19	3054.62	3051.04	3047.44	3043.75	3039.86	3035.72	3031.29	3026.57	3021.47	3015.92
206	High variant	Martinique		474	385.842	386.189	386.611	387.101	387.638	388.237	388.862	389.506	390.182	390.843	391.508	392.161	392.787	393.392	393.969	394.503	395.004	395.46	395.868	396.211	396.506	396.747	396.926	397.027	397.041	396.959	396.784	396.504	396.143	395.702	395.19	394.617	393.982	393.321	392.652	391.995	391.374	390.79	390.252	389.763	389.342	388.983	388.704	388.495	388.371
207	High variant	Montserrat		500	5.124	5.154	5.192	5.223	5.251	5.283	5.323	5.345	5.374	5.41	5.441	5.47	5.498	5.53	5.564	5.592	5.613	5.646	5.667	5.69	5.715	5.744	5.762	5.781	5.802	5.82	5.841	5.864	5.878	5.892	5.91	5.927	5.948	5.964	5.98	6.002	6.02	6.036	6.057	6.069	6.089	6.107	6.126	6.143	6.162
208	High variant	Puerto Rico		630	3673.73	3673.5	3674.71	3676.95	3679.91	3683.37	3687.2	3691.36	3695.88	3700.85	3706.32	3712.27	3718.47	3724.56	3730.03	3734.51	3737.84	3740.07	3741.22	3741.47	3740.9	3739.54	3737.36	3734.41	3730.8	3726.61	3721.88	3716.66	3711.05	3705.13	3699	3692.69	3686.26	3679.81	3673.44	3667.24	3661.24	3655.45	3649.81	3644.24	3638.68	3633.11	3627.54	3621.91	3616.15
209	High variant	Saint Kitts and Nevis		659	54.288	54.9	55.521	56.136	56.76	57.376	57.986	58.588	59.181	59.776	60.354	60.927	61.503	62.052	62.594	63.122	63.622	64.115	64.582	65.037	65.472	65.896	66.305	66.7	67.084	67.464	67.828	68.188	68.53	68.876	69.219	69.554	69.888	70.22	70.547	70.873	71.199	71.523	71.835	72.157	72.468	72.778	73.086	73.391	73.691
210	High variant	Saint Lucia		662	177.206	178.299	179.446	180.626	181.818	183.033	184.238	185.447	186.651	187.834	189.006	190.163	191.29	192.384	193.42	194.413	195.317	196.169	196.946	197.669	198.341	198.955	199.519	200.029	200.509	200.943	201.355	201.729	202.089	202.426	202.745	203.059	203.362	203.657	203.951	204.229	204.505	204.785	205.043	205.298	205.534	205.757	205.959	206.145	206.317
211	High variant	Saint Vincent and the Grenadines		670	109.455	109.892	110.346	110.833	111.326	111.834	112.342	112.853	113.365	113.88	114.396	114.916	115.425	115.917	116.412	116.878	117.331	117.761	118.177	118.578	118.985	119.389	119.785	120.176	120.547	120.9	121.236	121.544	121.839	122.118	122.391	122.644	122.906	123.147	123.383	123.615	123.846	124.071	124.288	124.495	124.696	124.891	125.073	125.259	125.418
212	High variant	Sint Maarten (Dutch part)		534	38.75	39.317	39.91	40.517	41.12	41.741	42.367	42.979	43.595	44.215	44.833	45.448	46.052	46.657	47.252	47.825	48.379	48.918	49.451	49.966	50.469	50.967	51.455	51.931	52.408	52.888	53.366	53.844	54.322	54.812	55.303	55.803	56.304	56.815	57.335	57.868	58.394	58.935	59.473	60.021	60.574	61.132	61.68	62.244	62.801
213	High variant	Trinidad and Tobago		780	1360.09	1366.85	1373.26	1379.3	1384.99	1390.31	1395.27	1399.88	1404.18	1408.16	1411.86	1415.3	1418.48	1421.39	1424.05	1426.42	1428.55	1430.43	1432.13	1433.67	1435.12	1436.48	1437.76	1438.99	1440.17	1441.31	1442.43	1443.53	1444.61	1445.65	1446.65	1447.62	1448.56	1449.44	1450.31	1451.12	1451.89	1452.62	1453.3	1453.95	1454.55	1455.11	1455.64	1456.16	1456.67
214	High variant	Turks and Caicos Islands		796	34.339	34.926	35.516	36.103	36.697	37.274	37.858	38.432	39.02	39.596	40.182	40.765	41.351	41.929	42.51	43.08	43.648	44.221	44.769	45.315	45.86	46.397	46.925	47.442	47.946	48.454	48.944	49.43	49.912	50.376	50.841	51.3	51.755	52.2	52.655	53.098	53.525	53.955	54.385	54.809	55.239	55.674	56.1	56.529	56.958
215	High variant	United States Virgin Islands		850	104.977	105.141	105.292	105.419	105.53	105.618	105.673	105.714	105.734	105.731	105.722	105.685	105.631	105.561	105.47	105.342	105.195	105.009	104.798	104.566	104.322	104.054	103.762	103.465	103.153	102.835	102.512	102.18	101.844	101.51	101.164	100.822	100.477	100.138	99.801	99.477	99.174	98.873	98.593	98.322	98.059	97.818	97.586	97.373	97.178
216	High variant	Central America		916	172635	175210	177845	180522	183228	185951	188685	191424	194166	196911	199658	202405	205144	207863	210547	213186	215774	218314	220809	223269	225699	228102	230475	232824	235149	237456	239744	242015	244271	246513	248743	250959	253163	255354	257532	259695	261844	263976	266089	268179	270242	272277	274283	276259	278203
217	High variant	Belize		84	359.288	367.441	375.854	384.493	393.288	402.229	411.26	420.381	429.561	438.77	448.024	457.302	466.569	475.804	484.979	494.066	503.054	511.947	520.752	529.49	538.161	546.781	555.353	563.878	572.375	580.883	589.375	597.87	606.374	614.891	623.439	632.018	640.619	649.226	657.846	666.449	675.043	683.606	692.143	700.637	709.087	717.479	725.816	734.081	742.267
218	High variant	Costa Rica		188	4807.85	4863.91	4920.75	4977.98	5035.3	5092.47	5149.31	5205.75	5261.72	5317.25	5372.33	5426.93	5480.87	5533.91	5585.69	5636	5684.7	5731.88	5777.64	5822.22	5865.79	5908.4	5950.03	5990.76	6030.67	6069.82	6108.26	6146.04	6183.2	6219.78	6255.81	6291.32	6326.32	6360.86	6394.98	6428.67	6461.99	6494.91	6527.38	6559.33	6590.71	6621.5	6651.72	6681.35	6710.39
219	High variant	El Salvador		222	6312.48	6353.21	6398.27	6446.56	6497.16	6549.36	6602.69	6656.89	6711.86	6767.68	6824.38	6881.85	6939.64	6996.97	7052.83	7106.52	7157.65	7206.39	7253.31	7299.24	7344.84	7390.28	7435.37	7479.99	7523.86	7566.83	7608.89	7650.2	7690.9	7731.21	7771.28	7811.15	7850.8	7890.29	7929.66	7968.95	8008.15	8047.22	8086.03	8124.38	8162.13	8199.21	8235.6	8271.18	8305.79
220	High variant	Guatemala		320	16252.4	16602.4	16962.7	17331.5	17707.2	18088.8	18475.5	18866.6	19262	19661.6	20065.4	20473	20883.5	21295.7	21707.6	22118.1	22526.5	22932.9	23337.6	23741.4	24144.8	24547.9	24950.5	25352.7	25755	26157.4	26560.1	26963	27366.4	27770.5	28175.3	28580.9	28987.1	29394	29801.3	30208.8	30616.4	31023.9	31431.2	31837.9	32243.7	32648.5	33052	33453.7	33853.2
221	High variant	Honduras		340	8960.83	9124.96	9293.85	9466.46	9641.9	9819.48	9998.69	10179.2	10360.8	10543.5	10727.2	10911.6	11096.3	11280.5	11463.1	11643.6	11821.4	11996.7	12169.6	12340.5	12509.7	12677.1	12842.7	13006.8	13169.6	13331.4	13492.1	13652	13810.9	13968.8	14125.7	14281.7	14436.8	14590.9	14744.1	14896.4	15047.7	15198.1	15347.2	15495.1	15641.5	15786.4	15929.6	16071.1	16210.9
222	High variant	Mexico		484	125891	127700	129545	131413	133296	135187	137079	138969	140855	142736	144612	146481	148337	150174	151982	153755	155489	157186	158848	160482	162091	163676	165237	166777	168298	169803	171293	172770	174233	175685	177125	178555	179973	181381	182776	184160	185531	186888	188230	189552	190852	192130	193385	194616	195822
223	High variant	Nicaragua		558	6082.03	6159.1	6238.52	6319.47	6401.34	6483.77	6566.65	6650.11	6734.47	6820.17	6907.61	6996.85	7087.49	7178.55	7268.69	7356.97	7442.98	7526.9	7609.02	7689.85	7769.82	7848.92	7927.02	8004.19	8080.45	8155.85	8230.43	8304.22	8377.24	8449.52	8521.07	8591.88	8661.96	8731.33	8800.02	8868.06	8935.41	9002.07	9067.9	9132.8	9196.67	9259.48	9321.17	9381.68	9440.94
224	High variant	Panama		591	3969.25	4038.78	4109.81	4181.97	4254.95	4328.51	4402.48	4476.75	4551.28	4626.07	4701.12	4776.38	4851.7	4926.84	5001.48	5075.44	5148.56	5220.93	5292.7	5364.13	5435.4	5506.57	5577.61	5648.55	5719.45	5790.31	5861.19	5932.09	6002.99	6073.89	6144.76	6215.6	6286.4	6357.1	6427.66	6498.02	6568.16	6638.06	6707.68	6776.96	6845.86	6914.38	6982.5	7050.21	7117.53
225	High variant	South America		931	416436	420995	425646	430356	435098	439852	444604	449344	454069	458779	463475	468150	472793	477379	481881	486276	490555	494722	498788	502769	506680	510524	514300	518014	521673	525283	528849	532375	535865	539327	542765	546181	549578	552955	556313	559651	562971	566270	569545	572788	575996	579166	582297	585386	588429
226	High variant	Argentina		32	43417.8	43897.9	44390.7	44893.2	45403	45918.4	46438.2	46961.8	47489	48020.1	48555.2	49094	49635.4	50176.9	50715.9	51250.2	51778.8	52302.1	52821.3	53337.9	53853.4	54368	54881.4	55394.2	55906.5	56418.7	56931.1	57443.9	57957.5	58472.3	58988.6	59506.6	60026.3	60547.6	61070.7	61595.6	62122	62649.8	63178.6	63707.7	64236.5	64764.9	65292.5	65818.7	66342.9
227	High variant	Bolivia (Plurinational State of)		68	10724.7	10901.2	11082.9	11269	11458.7	11651.4	11846.8	12044.6	12244.7	12447.1	12651.7	12858.4	13066.8	13276.1	13485.3	13693.8	13901.3	14107.8	14313.4	14518.3	14722.9	14926.9	15130.5	15333.8	15537	15740.2	15943.6	16147.1	16350.8	16554.9	16759.3	16964.2	17169.5	17375	17580.8	17786.6	17992.4	18198.2	18403.8	18608.9	18813.4	19017.3	19220.4	19422.5	19623.5
228	High variant	Brazil		76	205962	207925	209919	211931	213947	215957	217954	219934	221893	223833	225751	227646	229512	231338	233112	234826	236475	238062	239591	241071	242508	243905	245262	246581	247867	249122	250348	251549	252727	253887	255034	256167	257289	258399	259497	260581	261654	262713	263757	264781	265783	266761	267716	268645	269547
229	High variant	Chile		152	17762.7	17931.3	18104.9	18281.7	18460.2	18639.4	18818.5	18997.3	19175.7	19353.8	19531.8	19709.5	19886.2	20060.4	20230.5	20395.3	20554.1	20707.3	20855.5	20999.6	21140.7	21278.7	21413.7	21545.9	21675.5	21802.9	21928.3	22051.8	22173.7	22294.4	22414.1	22532.9	22651	22768.4	22885.3	23001.7	23117.8	23233.6	23348.8	23463.2	23576.7	23689.2	23800.8	23911.2	24020.4
230	High variant	Colombia		170	48228.7	48718.6	49215	49714.3	50213.4	50710	51202.5	51690.2	52172.7	52650.3	53122.9	53590.2	54050.6	54501.2	54938.5	55359.9	55764.4	56152.5	56524.9	56883.6	57230	57564.3	57886.6	58197.9	58499.5	58792.3	59077.1	59354.3	59624.7	59888.7	60147.1	60400.2	60648.5	60892.5	61132.9	61370	61604.3	61835.8	62064.2	62289.4	62510.9	62728.9	62943.4	63154.2	63360.9
231	High variant	Ecuador		218	16144.4	16406.2	16674	16946.4	17222.4	17501	17781.7	18064.1	18348	18633.2	18919.8	19207.4	19495.6	19783.3	20069.4	20353	20633.7	20911.7	21187.1	21460.8	21733	22004	22273.5	22541.8	22809.2	23075.8	23341.7	23606.9	23871.6	24135.7	24399.1	24661.9	24924.1	25185.7	25446.5	25706.4	25965.5	26223.7	26480.6	26736.2	26990.3	27242.6	27493.3	27742	27988.7
232	High variant	Falkland Islands (Malvinas)		238	2.898	2.909	2.919	2.932	2.935	2.946	2.953	2.963	2.97	2.979	2.986	2.994	3.005	3.011	3.014	3.019	3.022	3.033	3.035	3.039	3.041	3.05	3.051	3.052	3.059	3.066	3.07	3.071	3.075	3.083	3.087	3.096	3.103	3.109	3.12	3.124	3.132	3.14	3.149	3.156	3.166	3.173	3.185	3.196	3.206
233	High variant	French Guiana		254	268.691	275.985	283.426	290.999	298.7	306.53	314.505	322.611	330.862	339.28	347.857	356.617	365.536	374.598	383.785	393.064	402.433	411.893	421.43	431.067	440.78	450.578	460.449	470.387	480.383	490.437	500.542	510.692	520.889	531.16	541.478	551.861	562.31	572.821	583.395	594.03	604.736	615.515	626.361	637.28	648.288	659.372	670.538	681.775	693.088
234	High variant	Guyana		328	768.514	774.005	779.819	785.886	792.13	798.509	804.947	811.421	817.895	824.327	830.706	837.008	843.185	849.209	855.032	860.622	865.969	871.067	875.923	880.561	884.996	889.227	893.265	897.136	900.871	904.493	908.033	911.483	914.851	918.134	921.341	924.474	927.535	930.559	933.537	936.495	939.429	942.358	945.263	948.115	950.918	953.662	956.34	958.967	961.528
235	High variant	Paraguay		600	6639.12	6733.96	6831.75	6931.82	7033.6	7136.62	7240.52	7345.04	7450	7555.31	7660.88	7766.51	7871.94	7976.72	8080.32	8182.36	8282.64	8381.18	8478.13	8573.69	8668.09	8761.35	8853.48	8944.63	9035.03	9124.84	9214.16	9303.03	9391.56	9479.86	9568	9656.03	9743.94	9831.74	9919.4	10006.9	10094.2	10181.2	10267.8	10353.9	10439.2	10523.7	10607.3	10689.9	10771.4
236	High variant	Peru		604	31376.7	31810.8	32255.6	32708.2	33166.2	33627.8	34091.7	34557.3	35024.3	35493	35963.3	36435	36906.6	37376	37840.3	38297.3	38746.2	39187.1	39621	40049.4	40473.5	40893.4	41308.9	41720.5	42128.7	42533.8	42936.2	43336	43733.3	44128.3	44521.1	44911.9	45300.5	45687	46071.2	46453.1	46832.5	47209.4	47583.4	47954.2	48321.4	48685.1	49045	49400.8	49752.1
237	High variant	Suriname		740	553.208	559.01	564.936	570.953	576.997	583.065	589.124	595.159	601.168	607.146	613.091	618.999	624.849	630.614	636.241	641.706	646.995	652.127	657.105	661.928	666.634	671.227	675.702	680.066	684.342	688.534	692.654	696.708	700.708	704.646	708.554	712.419	716.253	720.067	723.88	727.684	731.505	735.329	739.148	742.97	746.791	750.604	754.405	758.192	761.959
238	High variant	Uruguay		858	3431.55	3448.55	3466.55	3485.32	3504.64	3524.39	3544.45	3564.75	3585.3	3606.06	3627.06	3648.27	3669.56	3690.76	3711.64	3732.05	3751.88	3771.19	3790.01	3808.47	3826.62	3844.52	3862.13	3879.54	3896.79	3913.95	3931.05	3948.12	3965.22	3982.39	3999.69	4017.13	4034.73	4052.5	4070.47	4088.63	4106.99	4125.55	4144.26	4163.04	4181.84	4200.67	4219.49	4238.27	4256.94
239	High variant	Venezuela (Bolivarian Republic of)		862	31155.1	31610	32073.9	32544.2	33018.6	33495.6	33973.9	34453	34933	35414	35896.2	36379.4	36862.4	37343.1	37818.8	38287.5	38748.3	39201.6	39648.4	40090.4	40528.8	40963.8	41395.3	41823.6	42249.2	42672.5	43093.7	43513	43930.5	44346	44759.5	45171.1	45580.9	45988.9	46395.2	46799.7	47202.5	47603.6	48002.6	48399.4	48793.8	49185.6	49574.8	49961.5	50345.5
240	High variant	NORTHERN AMERICA		905	356004	358937	362054	365320	368705	372184	375740	379363	383045	386786	390582	394425	398299	402175	406018	409804	413520	417167	420748	424272	427747	431175	434557	437900	441215	444511	447793	451071	454361	457686	461060	464494	467990	471556	475197	478917	482717	486601	490564	494604	498714	502895	507141	511445	515793
241	High variant	Bermuda		60	62.003	61.675	61.419	61.252	61.126	61.071	61.048	61.059	61.088	61.122	61.167	61.208	61.229	61.251	61.252	61.249	61.235	61.205	61.162	61.101	61.035	60.951	60.859	60.754	60.623	60.497	60.353	60.191	60.034	59.868	59.689	59.527	59.366	59.204	59.054	58.922	58.792	58.682	58.589	58.506	58.443	58.394	58.361	58.352	58.357
242	High variant	Canada		124	35949.7	36322	36707.5	37102.7	37505	37912	38322.2	38734.7	39149.1	39565.2	39983	40402.1	40820.8	41236.8	41646.8	42048.8	42441.7	42825.8	43202.1	43571.8	43936.1	44295.6	44650.2	45001	45349.2	45695.7	46041.1	46386.2	46732.3	47080.8	47433	47789.6	48150.8	48516.6	48886.6	49260.6	49638.5	50020.9	50407.8	50799.5	51196.2	51597.8	52004.2	52414.9	52829.5
243	High variant	Greenland		304	56.377	56.486	56.638	56.821	57.038	57.274	57.532	57.787	58.036	58.288	58.53	58.757	58.97	59.153	59.33	59.476	59.61	59.712	59.804	59.883	59.939	59.987	60.018	60.046	60.07	60.074	60.083	60.096	60.105	60.117	60.135	60.158	60.185	60.228	60.283	60.344	60.428	60.517	60.622	60.744	60.871	61.008	61.157	61.317	61.482
244	High variant	Saint Pierre and Miquelon		666	6.29	6.299	6.327	6.36	6.413	6.464	6.527	6.596	6.662	6.734	6.805	6.875	6.945	7.007	7.08	7.141	7.206	7.267	7.325	7.39	7.442	7.503	7.555	7.608	7.657	7.705	7.747	7.799	7.849	7.889	7.935	7.975	8.02	8.063	8.11	8.156	8.197	8.248	8.291	8.337	8.389	8.434	8.478	8.526	8.569
245	High variant	United States of America		840	319929	322490	325222	328093	331075	334147	337293	340502	343770	347095	350472	353896	357351	360810	364244	367627	370950	374213	377418	380572	383683	386751	389778	392771	395738	398687	401624	404557	407501	410477	413499	416576	419712	422912	426183	429529	432951	436452	440029	443677	447390	451169	455009	458902	462835
246	High variant	OCEANIA		909	39543	40169.8	40805.3	41447	42092.8	42741.6	43392.7	44046.5	44703.6	45365.4	46032.9	46706.2	47384.2	48064.1	48742.3	49416	50084.4	50748.2	51408.3	52066.1	52723.2	53379.7	54035.7	54692.2	55350.3	56011.1	56675	57342.4	58014.2	58691.5	59374.8	60064.7	60761.2	61463.8	62172.1	62885.6	63604.1	64327.6	65055.5	65787.5	66523	67261.8	68003.6	68747.7	69493.4
247	High variant	Australia/New Zealand		927	28414.1	28824.5	29238.6	29654.3	30070.3	30485.7	30900.1	31313.9	31727.7	32142.4	32558.9	32977.4	33397.1	33816.2	34232	34642.7	35047.7	35447.7	35843.6	36236.6	36627.9	37018	37406.9	37795.5	38184.8	38575.5	38968	39362.8	39760.7	40162.8	40569.7	40981.9	41399.2	41821.4	42247.6	42677.4	43110.5	43547	43986.6	44428.9	44873.8	45321	45770.2	46221.1	46672.9
248	High variant	Australia	24	36	23799.6	24159.3	24521.8	24885.5	25249.2	25612.2	25974.3	26335.8	26697.1	27059.2	27422.9	27788.2	28154.7	28520.8	28884.3	29243.8	29598.9	29950	30298	30644.1	30989.3	31334	31678.4	32023	32368.8	32716.4	33066.1	33418.3	33773.8	34133.4	34497.6	34866.9	35241.1	35619.8	36002.2	36387.9	36776.5	37168.1	37562.4	37959.2	38358.1	38759.1	39161.8	39565.8	39970.6
249	High variant	New Zealand		554	4614.53	4665.21	4716.76	4768.8	4821.1	4873.47	4925.82	4978.17	5030.57	5083.15	5136.01	5189.14	5242.37	5295.35	5347.63	5398.84	5448.86	5497.75	5545.59	5592.51	5638.63	5683.97	5728.56	5772.5	5815.95	5859.05	5901.85	5944.43	5986.91	6029.42	6072.1	6114.99	6158.16	6201.61	6245.4	6289.53	6334.03	6378.92	6424.19	6469.79	6515.69	6561.9	6608.42	6655.23	6702.31
250	High variant	Melanesia		928	9933.15	10138	10348	10562.5	10781	11003	11228.2	11456.6	11688.2	11923.2	12161.5	12403.1	12647.7	12894.6	13142.8	13391.7	13641.1	13890.9	14141.3	14392.5	14644.7	14897.8	15151.8	15406.9	15663.2	15920.8	16179.9	16440.3	16702.2	16965.5	17230.1	17496.2	17763.6	18032.5	18302.9	18574.9	18848.4	19123.3	19399.6	19677	19955.2	20234.4	20514.3	20794.8	21075.9
251	High variant	Fiji		242	892.149	900.501	908.839	917.109	925.317	933.423	941.42	949.321	957.131	964.88	972.572	980.218	987.791	995.27	1002.6	1009.74	1016.68	1023.43	1030.02	1036.46	1042.78	1048.99	1055.08	1061.06	1066.94	1072.75	1078.48	1084.14	1089.73	1095.25	1100.69	1106.08	1111.39	1116.67	1121.92	1127.15	1132.38	1137.6	1142.8	1147.99	1153.17	1158.31	1163.44	1168.56	1173.65
252	High variant	New Caledonia		540	269.091	272.988	276.983	281.059	285.201	289.399	293.634	297.91	302.223	306.582	310.988	315.418	319.885	324.359	328.817	333.239	337.627	341.968	346.27	350.541	354.791	359.003	363.179	367.336	371.468	375.589	379.683	383.772	387.854	391.938	396.032	400.136	404.254	408.385	412.531	416.679	420.838	425.006	429.178	433.369	437.565	441.775	445.99	450.224	454.447
253	High variant	Papua New Guinea		598	7919.82	8093.64	8272.19	8454.84	8641.12	8830.65	9023.19	9218.64	9417	9618.35	9822.73	10030.1	10240	10452	10665.4	10879.4	11094	11309.1	11524.9	11741.4	11958.9	12177.4	12396.7	12617	12838.4	13061.2	13285.3	13510.7	13737.4	13965.5	14194.9	14425.6	14657.5	14890.9	15125.6	15361.6	15599.1	15837.8	16077.8	16318.6	16560.3	16802.8	17045.9	17289.5	17533.6
254	High variant	Solomon Islands		90	587.482	600.078	612.932	626.022	639.335	652.866	666.616	680.589	694.815	709.295	724.06	739.108	754.42	769.967	785.692	801.558	817.556	833.678	849.926	866.31	882.818	899.457	916.21	933.076	950.061	967.149	984.347	1001.64	1019.04	1036.51	1054.07	1071.69	1089.39	1107.17	1125.06	1143.06	1161.18	1179.43	1197.78	1216.22	1234.74	1253.34	1272.02	1290.78	1309.63
255	High variant	Vanuatu		548	264.603	270.756	277.044	283.47	289.991	296.618	303.349	310.154	317.057	324.058	331.146	338.329	345.601	352.933	360.321	367.739	375.193	382.671	390.189	397.747	405.346	413.004	420.704	428.452	436.263	444.136	452.071	460.066	468.121	476.251	484.446	492.703	501.024	509.399	517.839	526.33	534.874	543.455	552.087	560.75	569.451	578.182	586.943	595.726	604.527
256	High variant	Micronesia		954	518.995	523.844	529.005	534.41	540.026	545.789	551.712	557.786	563.994	570.381	576.96	583.704	590.614	597.587	604.522	611.365	618.091	624.697	631.188	637.545	643.83	650.005	656.089	662.06	667.959	673.76	679.491	685.156	690.745	696.326	701.843	707.357	712.824	718.346	723.879	729.479	735.129	740.868	746.673	752.535	758.459	764.436	770.477	776.567	782.668
257	High variant	Guam		316	161.797	163.374	165.022	166.715	168.44	170.193	171.965	173.755	175.543	177.354	179.161	180.974	182.782	184.578	186.339	188.056	189.72	191.343	192.904	194.426	195.902	197.342	198.734	200.082	201.409	202.685	203.939	205.156	206.36	207.541	208.711	209.868	211.009	212.161	213.309	214.473	215.648	216.836	218.04	219.252	220.471	221.685	222.921	224.151	225.381
258	High variant	Kiribati		296	112.407	114.523	116.708	118.939	121.217	123.515	125.83	128.154	130.494	132.838	135.183	137.526	139.876	142.217	144.539	146.832	149.111	151.363	153.61	155.857	158.123	160.413	162.729	165.078	167.455	169.889	172.369	174.897	177.473	180.103	182.756	185.459	188.192	190.969	193.778	196.613	199.488	202.386	205.296	208.224	211.155	214.092	217.013	219.947	222.862
259	High variant	Marshall Islands		584	52.994	53.167	53.306	53.415	53.512	53.602	53.714	53.858	54.034	54.281	54.607	55.017	55.51	56.086	56.713	57.404	58.134	58.919	59.745	60.604	61.501	62.409	63.35	64.282	65.216	66.117	66.995	67.855	68.662	69.428	70.149	70.818	71.433	72.013	72.554	73.077	73.562	74.042	74.513	74.992	75.495	76.02	76.584	77.182	77.82
260	High variant	Micronesia (Fed. States of)		583	104.433	105.061	105.84	106.727	107.713	108.766	109.892	111.078	112.323	113.631	115.022	116.474	117.982	119.499	121.015	122.476	123.878	125.222	126.515	127.745	128.929	130.055	131.139	132.169	133.17	134.136	135.072	135.998	136.903	137.812	138.727	139.657	140.604	141.572	142.57	143.602	144.674	145.775	146.901	148.041	149.186	150.335	151.48	152.605	153.707
261	High variant	Nauru		520	11.26	11.248	11.251	11.262	11.289	11.321	11.358	11.406	11.453	11.504	11.571	11.627	11.696	11.761	11.82	11.881	11.941	11.992	12.047	12.094	12.141	12.184	12.219	12.256	12.291	12.328	12.36	12.393	12.414	12.449	12.472	12.499	12.518	12.552	12.569	12.6	12.621	12.646	12.679	12.706	12.734	12.766	12.788	12.825	12.852
262	High variant	Northern Mariana Islands		580	54.816	54.936	55.088	55.282	55.502	55.745	56.007	56.285	56.58	56.889	57.218	57.571	57.921	58.277	58.612	58.926	59.216	59.474	59.699	59.884	60.036	60.151	60.222	60.257	60.248	60.208	60.135	60.022	59.884	59.728	59.543	59.346	59.142	58.926	58.718	58.5	58.291	58.09	57.908	57.736	57.588	57.453	57.347	57.26	57.192
263	High variant	Palau		585	21.288	21.535	21.79	22.07	22.353	22.647	22.946	23.25	23.567	23.884	24.198	24.515	24.847	25.169	25.484	25.79	26.091	26.384	26.668	26.935	27.198	27.451	27.696	27.936	28.17	28.397	28.621	28.835	29.049	29.265	29.485	29.71	29.926	30.153	30.381	30.614	30.845	31.093	31.336	31.584	31.83	32.085	32.344	32.597	32.854
264	High variant	Polynesia	25	957	676.747	683.433	689.769	695.793	701.582	707.187	712.645	718.132	723.694	729.483	735.566	741.992	748.763	755.794	762.991	770.243	777.534	784.877	792.222	799.504	806.722	813.833	820.804	827.665	834.426	841.114	847.7	854.196	860.589	866.936	873.162	879.352	885.494	891.593	897.691	903.85	910.057	916.318	922.634	929.011	935.483	942.003	948.574	955.228	961.945
265	High variant	American Samoa		16	55.537	55.621	55.745	55.897	56.077	56.289	56.531	56.797	57.077	57.383	57.703	58.04	58.396	58.75	59.114	59.48	59.85	60.213	60.573	60.905	61.215	61.491	61.744	61.96	62.164	62.356	62.531	62.695	62.853	63.006	63.147	63.296	63.441	63.592	63.747	63.914	64.086	64.273	64.47	64.671	64.881	65.093	65.312	65.536	65.749
266	High variant	Cook Islands		184	17.449	17.465	17.499	17.545	17.613	17.688	17.762	17.856	17.949	18.05	18.152	18.25	18.345	18.434	18.537	18.625	18.703	18.783	18.849	18.925	18.988	19.049	19.104	19.169	19.227	19.296	19.356	19.428	19.503	19.579	19.652	19.729	19.814	19.898	19.994	20.092	20.187	20.293	20.405	20.513	20.622	20.721	20.817	20.912	21.006
267	High variant	French Polynesia		258	277.69	281.519	285.012	288.145	290.938	293.421	295.667	297.777	299.86	302.043	304.435	307.088	309.991	313.046	316.088	319.003	321.764	324.403	326.94	329.407	331.817	334.178	336.477	338.716	340.907	343.047	345.144	347.197	349.206	351.202	353.168	355.113	357.042	358.958	360.853	362.739	364.623	366.492	368.348	370.199	372.034	373.863	375.664	377.452	379.237
268	High variant	Niue		570	1.629	1.629	1.627	1.636	1.642	1.648	1.646	1.656	1.662	1.672	1.677	1.687	1.699	1.718	1.73	1.747	1.76	1.772	1.786	1.797	1.81	1.825	1.841	1.853	1.861	1.874	1.891	1.904	1.914	1.929	1.934	1.951	1.966	1.978	1.995	2.006	2.021	2.033	2.045	2.06	2.076	2.093	2.107	2.121	2.137
269	High variant	Samoa		882	193.759	195.439	197.01	198.534	200.054	201.616	203.212	204.866	206.563	208.294	210.033	211.781	213.548	215.395	217.364	219.511	221.838	224.329	226.938	229.59	232.243	234.878	237.494	240.091	242.681	245.255	247.818	250.364	252.869	255.35	257.793	260.194	262.578	264.928	267.277	269.647	272.025	274.423	276.84	279.297	281.791	284.32	286.891	289.515	292.182
270	High variant	Tokelau		772	1.252	1.285	1.306	1.326	1.35	1.371	1.386	1.396	1.41	1.419	1.437	1.451	1.468	1.485	1.496	1.508	1.526	1.541	1.547	1.554	1.569	1.582	1.585	1.599	1.609	1.618	1.629	1.636	1.651	1.662	1.676	1.692	1.705	1.72	1.729	1.745	1.76	1.771	1.783	1.797	1.813	1.83	1.847	1.859	1.875
271	High variant	Tonga		776	106.364	107.435	108.522	109.623	110.752	111.907	113.082	114.291	115.533	116.825	118.164	119.556	120.992	122.468	123.969	125.492	127.031	128.585	130.149	131.714	133.285	134.857	136.424	137.977	139.52	141.044	142.541	144.017	145.477	146.916	148.328	149.732	151.123	152.509	153.894	155.298	156.73	158.177	159.658	161.161	162.701	164.274	165.877	167.518	169.188
272	High variant	Tuvalu		798	11.001	11.098	11.21	11.328	11.455	11.594	11.734	11.886	12.037	12.194	12.356	12.529	12.7	12.863	13.041	13.213	13.382	13.548	13.712	13.869	14.025	14.178	14.326	14.471	14.613	14.755	14.906	15.046	15.187	15.334	15.48	15.635	15.788	15.954	16.116	16.286	16.463	16.656	16.844	17.037	17.243	17.444	17.646	17.857	18.068
273	High variant	Wallis and Futuna Islands		876	12.066	11.942	11.838	11.759	11.701	11.653	11.625	11.607	11.603	11.603	11.609	11.61	11.624	11.635	11.652	11.664	11.68	11.703	11.728	11.743	11.77	11.795	11.809	11.829	11.844	11.869	11.884	11.909	11.929	11.958	11.984	12.01	12.037	12.056	12.086	12.123	12.162	12.2	12.241	12.276	12.322	12.365	12.413	12.458	12.503
[truncated: 41 more columns]

## Sheet: LOW VARIANT
United Nations
Population Division
Department of Economic and Social Affairs
World Population Prospects: The 2017 Revision
File POP/1-1: Total population (both sexes combined) by region, subregion and country, annually for 1950-2100 (thousands)
Low fertility variant, 2015 - 2100
POP/DB/WPP/Rev.2017/POP/F01-1
June 2017 - Copyright © 2017 by United Nations. All rights reserved
Suggested citation: United Nations, Department of Economic and Social Affairs, Population Division (2017). World Population Prospects: The 2017 Revision, DVD Edition.
					Total population, both sexes combined, as of 1 July (thousands)
Index	Variant	Region, subregion, country or area *	Notes	Country code	2015	2016	2017	2018	2019	2020	2021	2022	2023	2024	2025	2026	2027	2028	2029	2030	2031	2032	2033	2034	2035	2036	2037	2038	2039	2040	2041	2042	2043	2044	2045	2046	2047	2048	2049	2050	2051	2052	2053	2054	2055	2056	2057	2058	2059
1	Low variant	WORLD		900	7.38301e+06	7.45817e+06	7.52962e+06	7.59782e+06	7.66314e+06	7.72586e+06	7.78616e+06	7.84411e+06	7.8997e+06	7.95287e+06	8.00357e+06	8.05183e+06	8.09787e+06	8.14207e+06	8.18493e+06	8.22682e+06	8.2679e+06	8.3081e+06	8.34728e+06	8.38517e+06	8.42159e+06	8.45649e+06	8.4899e+06	8.52171e+06	8.55184e+06	8.58019e+06	8.60671e+06	8.63135e+06	8.65402e+06	8.67462e+06	8.69309e+06	8.70939e+06	8.72351e+06	8.73544e+06	8.74518e+06	8.75275e+06	8.75816e+06	8.76143e+06	8.76262e+06	8.76182e+06	8.75912e+06	8.75454e+06	8.74815e+06	8.74002e+06	8.73028e+06
2	Low variant	More developed regions	a	901	1.25321e+06	1.25541e+06	1.25705e+06	1.2582e+06	1.25891e+06	1.25921e+06	1.25914e+06	1.25873e+06	1.258e+06	1.25696e+06	1.25562e+06	1.25401e+06	1.25215e+06	1.25009e+06	1.24786e+06	1.24551e+06	1.24306e+06	1.24051e+06	1.23786e+06	1.2351e+06	1.23221e+06	1.22919e+06	1.22606e+06	1.2228e+06	1.21943e+06	1.21593e+06	1.21231e+06	1.20857e+06	1.20468e+06	1.20065e+06	1.19647e+06	1.19213e+06	1.18763e+06	1.18297e+06	1.17813e+06	1.1731e+06	1.16789e+06	1.16249e+06	1.15693e+06	1.15122e+06	1.14538e+06	1.13941e+06	1.13332e+06	1.12713e+06	1.12086e+06
3	Low variant	Less developed regions	b	902	6.1298e+06	6.20277e+06	6.27257e+06	6.33961e+06	6.40423e+06	6.46665e+06	6.52702e+06	6.58538e+06	6.6417e+06	6.69591e+06	6.74795e+06	6.79782e+06	6.84571e+06	6.89198e+06	6.93707e+06	6.98131e+06	7.02484e+06	7.06759e+06	7.10941e+06	7.15007e+06	7.18938e+06	7.2273e+06	7.26384e+06	7.29891e+06	7.33241e+06	7.36426e+06	7.3944e+06	7.42278e+06	7.44933e+06	7.47397e+06	7.49662e+06	7.51726e+06	7.53588e+06	7.55247e+06	7.56706e+06	7.57965e+06	7.59027e+06	7.59893e+06	7.60569e+06	7.6106e+06	7.61374e+06	7.61514e+06	7.61483e+06	7.6129e+06	7.60942e+06
4	Low variant	Least developed countries	c	941	956631	978171	999681	1.02122e+06	1.04283e+06	1.06452e+06	1.08631e+06	1.10818e+06	1.13011e+06	1.15205e+06	1.17398e+06	1.19587e+06	1.21775e+06	1.23966e+06	1.2617e+06	1.2839e+06	1.30628e+06	1.32881e+06	1.35146e+06	1.37416e+06	1.39688e+06	1.41958e+06	1.44227e+06	1.4649e+06	1.48745e+06	1.50988e+06	1.53217e+06	1.55431e+06	1.57626e+06	1.598e+06	1.6195e+06	1.64075e+06	1.66173e+06	1.68244e+06	1.70286e+06	1.723e+06	1.74285e+06	1.7624e+06	1.78164e+06	1.80056e+06	1.81916e+06	1.83744e+06	1.85539e+06	1.87299e+06	1.89026e+06
5	Low variant	Less developed regions, excluding least developed countries	d	934	5.17317e+06	5.2246e+06	5.27289e+06	5.3184e+06	5.36141e+06	5.40213e+06	5.44071e+06	5.47719e+06	5.51159e+06	5.54386e+06	5.57397e+06	5.60195e+06	5.62797e+06	5.65231e+06	5.67537e+06	5.69741e+06	5.71856e+06	5.73877e+06	5.75795e+06	5.77591e+06	5.79251e+06	5.80772e+06	5.82158e+06	5.83401e+06	5.84496e+06	5.85438e+06	5.86222e+06	5.86847e+06	5.87307e+06	5.87597e+06	5.87712e+06	5.87651e+06	5.87415e+06	5.87003e+06	5.86419e+06	5.85665e+06	5.84742e+06	5.83653e+06	5.82405e+06	5.81004e+06	5.79458e+06	5.7777e+06	5.75945e+06	5.7399e+06	5.71916e+06
6	Low variant	Less developed regions, excluding China		948	4.70144e+06	4.76946e+06	4.83531e+06	4.89933e+06	4.96175e+06	5.02275e+06	5.08243e+06	5.14079e+06	5.19778e+06	5.25332e+06	5.30732e+06	5.35979e+06	5.41084e+06	5.46077e+06	5.50994e+06	5.55862e+06	5.60692e+06	5.65475e+06	5.70199e+06	5.74842e+06	5.79387e+06	5.8383e+06	5.88171e+06	5.924e+06	5.96509e+06	6.00488e+06	6.04333e+06	6.08039e+06	6.11598e+06	6.15003e+06	6.18249e+06	6.21331e+06	6.24248e+06	6.27e+06	6.29586e+06	6.32008e+06	6.34266e+06	6.3636e+06	6.38291e+06	6.40063e+06	6.4168e+06	6.43142e+06	6.4445e+06	6.4561e+06	6.46625e+06
7	Low variant	High-income countries	e	1503	1.18006e+06	1.18481e+06	1.18894e+06	1.19252e+06	1.1956e+06	1.19822e+06	1.20044e+06	1.20229e+06	1.20379e+06	1.20498e+06	1.20587e+06	1.2065e+06	1.20687e+06	1.20704e+06	1.20702e+06	1.20684e+06	1.20652e+06	1.20606e+06	1.20546e+06	1.20468e+06	1.20372e+06	1.20257e+06	1.20124e+06	1.19973e+06	1.19803e+06	1.19615e+06	1.19408e+06	1.19182e+06	1.18937e+06	1.18672e+06	1.18386e+06	1.1808e+06	1.17754e+06	1.17406e+06	1.17037e+06	1.16644e+06	1.16229e+06	1.15792e+06	1.15335e+06	1.14859e+06	1.14367e+06	1.13859e+06	1.13336e+06	1.128e+06	1.12254e+06
8	Low variant	Middle-income countries	e	1517	5.55826e+06	5.61194e+06	5.66248e+06	5.71028e+06	5.7556e+06	5.79865e+06	5.83956e+06	5.87837e+06	5.91506e+06	5.94955e+06	5.98178e+06	6.01179e+06	6.03973e+06	6.06593e+06	6.09082e+06	6.11471e+06	6.13772e+06	6.1598e+06	6.18086e+06	6.20069e+06	6.21916e+06	6.23625e+06	6.25197e+06	6.26626e+06	6.27906e+06	6.29029e+06	6.29993e+06	6.30795e+06	6.31429e+06	6.31887e+06	6.32166e+06	6.32263e+06	6.32179e+06	6.31914e+06	6.3147e+06	6.3085e+06	6.30054e+06	6.29087e+06	6.27954e+06	6.26662e+06	6.25217e+06	6.23624e+06	6.21887e+06	6.20014e+06	6.18014e+06
9	Low variant	Upper-middle-income countries	e	1502	2.58836e+06	2.6036e+06	2.61677e+06	2.6281e+06	2.63776e+06	2.64592e+06	2.65268e+06	2.65815e+06	2.66241e+06	2.66549e+06	2.66746e+06	2.66838e+06	2.66834e+06	2.66749e+06	2.66597e+06	2.66391e+06	2.66137e+06	2.65837e+06	2.65488e+06	2.65083e+06	2.64617e+06	2.6409e+06	2.63504e+06	2.6286e+06	2.62155e+06	2.61388e+06	2.60559e+06	2.59667e+06	2.5871e+06	2.57685e+06	2.5659e+06	2.55423e+06	2.54187e+06	2.5288e+06	2.51504e+06	2.50058e+06	2.48544e+06	2.46964e+06	2.45322e+06	2.43622e+06	2.41868e+06	2.40062e+06	2.38208e+06	2.36312e+06	2.34378e+06
10	Low variant	Lower-middle-income countries	e	1501	2.9699e+06	3.00834e+06	3.04571e+06	3.08217e+06	3.11783e+06	3.15274e+06	3.18688e+06	3.22022e+06	3.25265e+06	3.28406e+06	3.31432e+06	3.34341e+06	3.37139e+06	3.39845e+06	3.42485e+06	3.4508e+06	3.47634e+06	3.50143e+06	3.52598e+06	3.54987e+06	3.573e+06	3.59535e+06	3.61692e+06	3.63766e+06	3.65751e+06	3.67642e+06	3.69435e+06	3.71128e+06	3.72718e+06	3.74202e+06	3.75576e+06	3.7684e+06	3.77992e+06	3.79033e+06	3.79966e+06	3.80791e+06	3.8151e+06	3.82123e+06	3.82632e+06	3.8304e+06	3.83349e+06	3.83562e+06	3.83678e+06	3.83702e+06	3.83636e+06
11	Low variant	Low-income countries	e	1500	641859	658574	675307	692104	708998	726011	743151	760417	777794	795265	812809	830420	848112	865919	883889	902055	920423	938973	957675	976489	995378	1.01433e+06	1.03332e+06	1.05234e+06	1.07135e+06	1.09033e+06	1.10926e+06	1.12813e+06	1.1469e+06	1.16556e+06	1.18409e+06	1.20247e+06	1.22069e+06	1.23873e+06	1.25661e+06	1.2743e+06	1.2918e+06	1.30911e+06	1.3262e+06	1.34308e+06	1.35975e+06	1.37619e+06	1.39239e+06	1.40835e+06	1.42407e+06
12	Low variant	Sub-Saharan Africa	f	947	969234	994691	1.02017e+06	1.04575e+06	1.07149e+06	1.09742e+06	1.12358e+06	1.14996e+06	1.17655e+06	1.20332e+06	1.23025e+06	1.25734e+06	1.28461e+06	1.31211e+06	1.33992e+06	1.3681e+06	1.39665e+06	1.42555e+06	1.45475e+06	1.48418e+06	1.5138e+06	1.54358e+06	1.57349e+06	1.60351e+06	1.63359e+06	1.66368e+06	1.69376e+06	1.72379e+06	1.75375e+06	1.7836e+06	1.81331e+06	1.84285e+06	1.8722e+06	1.90135e+06	1.93029e+06	1.959e+06	1.98747e+06	2.01568e+06	2.04361e+06	2.07126e+06	2.09861e+06	2.12565e+06	2.15237e+06	2.17875e+06	2.2048e+06
13	Low variant	AFRICA		903	1.19437e+06	1.22382e+06	1.25314e+06	1.28243e+06	1.31177e+06	1.34121e+06	1.37078e+06	1.4005e+06	1.43033e+06	1.46026e+06	1.49026e+06	1.52033e+06	1.55049e+06	1.58083e+06	1.61146e+06	1.64243e+06	1.67377e+06	1.70545e+06	1.73741e+06	1.7696e+06	1.80195e+06	1.83442e+06	1.86702e+06	1.89968e+06	1.93234e+06	1.96497e+06	1.99751e+06	2.02995e+06	2.06223e+06	2.09433e+06	2.1262e+06	2.15782e+06	2.18916e+06	2.2202e+06	2.25093e+06	2.28134e+06	2.31141e+06	2.34112e+06	2.37045e+06	2.3994e+06	2.42796e+06	2.45612e+06	2.48385e+06	2.51117e+06	2.53806e+06
14	Low variant	Eastern Africa		910	399458	410228	420992	431779	442612	453504	464463	475487	486568	497696	508858	520051	531282	542576	553961	565459	577073	588791	600593	612453	624347	636265	648199	660135	672056	683947	695796	707592	719322	730971	742529	753984	765329	776559	787672	798662	809524	820252	830843	841295	851604	861768	871779	881634	891329
15	Low variant	Burundi		108	10199.3	10525.3	10852.2	11180.8	11511.7	11845.1	12181.1	12519.5	12859.7	13201.2	13543.4	13886.4	14230.6	14577.5	14928.8	15286	15649.4	16019	16395.1	16777.9	17167.7	17564.4	17967.9	18377.5	18792.4	19211.9	19635.7	20063.1	20493.3	20925	21357.2	21789.3	22220.9	22651.5	23080.5	23507.4	23931.9	24353.8	24772.9	25189.3	25603.1	26014.2	26422.4	26827.9	27231
16	Low variant	Comoros		174	777.424	794.744	811.842	828.774	845.57	862.267	878.868	895.375	911.776	928.038	944.153	960.108	975.926	991.653	1007.36	1023.09	1038.85	1054.63	1070.41	1086.15	1101.82	1117.4	1132.9	1148.28	1163.51	1178.57	1193.46	1208.14	1222.6	1236.8	1250.7	1264.31	1277.6	1290.57	1303.18	1315.43	1327.32	1338.84	1349.99	1360.77	1371.19	1381.26	1390.97	1400.31	1409.29
17	Low variant	Djibouti		262	927.414	940.954	954.024	966.643	978.862	990.678	1002.12	1013.16	1023.79	1034	1043.75	1053.04	1061.88	1070.33	1078.45	1086.26	1093.8	1101.05	1107.98	1114.57	1120.77	1126.6	1132.04	1137.12	1141.81	1146.1	1150	1153.5	1156.6	1159.28	1161.54	1163.37	1164.78	1165.76	1166.28	1166.36	1165.98	1165.15	1163.88	1162.16	1160	1157.41	1154.39	1150.95	1147.11
18	Low variant	Eritrea		232	4846.98	4955.4	5062.9	5169.98	5277.01	5384.24	5491.75	5599.52	5707.4	5815.14	5922.56	6029.59	6136.41	6243.45	6351.36	6460.54	6571.1	6682.84	6795.52	6908.8	7022.36	7136.04	7249.76	7363.17	7475.91	7587.66	7698.21	7807.41	7914.98	8020.66	8124.2	8225.45	8324.32	8420.76	8514.77	8606.33	8695.39	8781.92	8865.98	8947.65	9027.03	9104.11	9178.88	9251.38	9321.65
19	Low variant	Ethiopia		231	99873	102287	104681	107060	109426	111782	114124	116452	118760	121042	123294	125513	127701	129863	132008	134141	136265	138374	140466	142534	144572	146579	148553	150494	152399	154267	156096	157884	159629	161327	162975	164572	166116	167606	169040	170417	171737	172997	174198	175341	176425	177450	178415	179321	180167
20	Low variant	Kenya		404	47236.3	48407.1	49565.3	50714.8	51858.9	52999.7	54138.7	55276.2	56412.1	57545.5	58675.4	59801.7	60925.3	62048.8	63175.2	64306.5	65443.3	66583.8	67725.3	68863.9	69996.3	71121.3	72238	73344.2	74437.7	75516.4	76578.9	77624.1	78651.3	79660.1	80649.8	81619.6	82568.8	83496.9	84403.4	85288.1	86150.5	86989.9	87806.2	88599	89368.1	90113.1	90833.4	91528.9	92199.3
21	Low variant	Madagascar		450	24234.1	24864.7	25500	26140.8	26787.7	27440.9	28100.1	28764.9	29434.4	30107.6	30783.5	31461.7	32142.2	32826	33514.2	34207.8	34906.7	35610.2	36317.2	37026.4	37736.5	38447	39157.5	39867.4	40576	41282.6	41986.9	42688.1	43385.7	44079.2	44768	45451.7	46129.8	46802.1	47468.4	48128.5	48782.1	49428.7	50068.1	50699.9	51323.9	51939.7	52547.1	53145.6	53735.3
22	Low variant	Malawi		454	17573.6	18073.5	18575.6	19081	19590.5	20104.6	20624	21148.9	21679.7	22216.5	22759.4	23308.5	23863.8	24425.3	24993.1	25567.1	26147.2	26732.9	27323.3	27917.3	28514	29112.8	29713.3	30314.8	30916.6	31518.1	32118.8	32718.1	33315.4	33910	34501.4	35088.9	35672.3	36251.2	36825.5	37395	37959.4	38518.2	39071	39617.2	40156.4	40688.2	41212.3	41728.1	42235.5
23	Low variant	Mauritius	1	480	1259.46	1261.34	1262.52	1263.09	1263.08	1262.57	1261.57	1260.12	1258.24	1255.92	1253.2	1250.08	1246.58	1242.74	1238.62	1234.25	1229.65	1224.82	1219.72	1214.31	1208.57	1202.47	1196.03	1189.27	1182.17	1174.75	1167	1158.94	1150.58	1141.9	1132.93	1123.68	1114.17	1104.41	1094.46	1084.33	1074.05	1063.63	1053.08	1042.44	1031.73	1020.95	1010.13	999.269	988.382
24	Low variant	Mayotte		175	240.02	246.291	252.474	258.583	264.65	270.689	276.701	282.711	288.706	294.696	300.672	306.638	312.597	318.574	324.572	330.622	336.701	342.83	348.984	355.124	361.262	367.362	373.446	379.481	385.463	391.382	397.22	402.982	408.643	414.203	419.649	424.981	430.186	435.259	440.211	445.026	449.714	454.264	458.684	462.975	467.142	471.173	475.076	478.855	482.51
25	Low variant	Mozambique		508	28010.7	28801.4	29598.7	30404.7	31221.3	32049.7	32890.4	33743.6	34608.9	35485.7	36373.2	37271.2	38180.2	39101.6	40037.3	40988.4	41955.2	42936.6	43930.9	44935.6	45948.7	46969.3	47996.8	49030.1	50068.1	51109.7	52154	53200.1	54247.1	55294.1	56340.2	57384.5	58426.6	59466	60502.7	61536.4	62566.6	63592.6	64614	65630.2	66640.7	67645.1	68642.7	69633	70615.1
26	Low variant	Réunion		638	863.363	869.069	874.491	879.67	884.622	889.357	893.878	898.171	902.224	906.001	909.474	912.635	915.504	918.104	920.492	922.691	924.736	926.59	928.234	929.612	930.707	931.503	932	932.184	932.042	931.56	930.731	929.567	928.051	926.181	923.957	921.378	918.465	915.229	911.681	907.832	903.706	899.332	894.692	889.854	884.827	879.617	874.244	868.748	863.111
27	Low variant	Rwanda		646	11629.6	11909.2	12181.7	12448.5	12710.8	12969.4	13224.8	13477.3	13727	13973.6	14217	14457.3	14695	14931.1	15166.9	15403.4	15640.7	15878.5	16116.4	16353.5	16589.2	16823.2	17055.2	17284.3	17509.6	17730.2	17945.6	18155.6	18359.4	18556.5	18746.3	18928.4	19102.8	19269.4	19428.5	19580.2	19724.4	19861.2	19990.6	20113.2	20229.1	20338.4	20441.1	20537.3	20626.8
28	Low variant	Seychelles		690	93.742	94.21	94.586	94.896	95.136	95.309	95.431	95.493	95.52	95.485	95.423	95.309	95.159	94.984	94.785	94.568	94.34	94.101	93.847	93.573	93.284	92.978	92.652	92.313	91.941	91.552	91.143	90.7	90.238	89.746	89.223	88.658	88.058	87.437	86.789	86.102	85.388	84.655	83.895	83.121	82.319	81.505	80.685	79.845	78.994
29	Low variant	Somalia		706	13908.1	14302.2	14706.5	15121.8	15548.1	15985.4	16433.5	16891.8	17359.2	17835	18318.2	18808.2	19305.3	19810.1	20324.1	20847.9	21381.7	21924.9	22476.9	23036.8	23603.9	24177.9	24758.5	25345.2	25937.4	26534.7	27136.6	27742.6	28352.4	28965.3	29580.9	30198.7	30818.5	31439.7	32062	32685.1	33308.4	33931.7	34554.6	35177.1	35798.9	36419.6	37038.9	37656.2	38271.1
30	Low variant	South Sudan		728	11882.1	12211.2	12536.9	12860	13181.2	13500.8	13819.3	14136.7	14453.1	14768.4	15082.6	15395.8	15708.3	16020.7	16333.8	16648.4	16964.4	17281.8	17600.6	17920.5	18241.4	18563.3	18885.8	19208.4	19530.5	19851.4	20170.9	20488.6	20804.1	21117	21426.7	21733.1	22035.8	22334.7	22629.6	22920.4	23206.9	23488.9	23766.4	24039.3	24307.6	24571	24829.5	25083.1	25331.6
31	Low variant	Uganda		800	40144.9	41443.6	42755.7	44084.4	45432.1	46800.7	48190.7	49602.3	51034.8	52486.7	53957.1	55445.3	56952	58479.3	60030	61605.9	63207.1	64831.8	66477.6	68140.9	69818.7	71509.4	73212	74924.2	76643.7	78368.3	80096.2	81826.2	83556.6	85285.9	87012.8	88736	90454.2	92167	93873.8	95574.2	97267.3	98951.8	100627	102292	103947	105589	107219	108835	110436
32	Low variant	United Republic of Tanzania	2	834	53880	55526.1	57180.3	58848.5	60535.3	62244.1	63977	65734.9	67517.7	69324.5	71154.2	73007.1	74884.8	76791.2	78731	80707.6	82721.8	84771.7	86854.4	88965.1	91100.1	93257.7	95436.8	97634.6	99847.9	102074	104311	106557	108810	111067	113327	115588	117848	120109	122369	124629	126889	129148	131405	133660	135914	138166	140415	142658	144896
33	Low variant	Zambia		894	16100.6	16572.3	17049.2	17532.4	18022.9	18521.2	19027.8	19542.8	20066.2	20597.9	21137.7	21685.6	22241.9	22807.2	23382.3	23967.7	24563.5	25169.4	25784.6	26408.3	27039.6	27678.2	28323.7	28975.6	29633.2	30295.9	30963.4	31635.1	32310.7	32989.4	33670.8	34354.5	35040.2	35728	36418.1	37110.5	37805	38501.2	39198.9	39897.5	40596.7	41296.2	41995.6	42694.9	43394.2
34	Low variant	Zimbabwe		716	15777.5	16142.7	16496.2	16840.2	17176.4	17506.2	17830.9	18151.3	18468.2	18781.8	19092.7	19401.2	19708.1	20014.3	20321	20628.9	20938.3	21248.9	21560.1	21870.7	22179.7	22486.7	22791.5	23093.4	23391.5	23685.3	23974	24257.3	24534.8	24805.9	25070.3	25327.6	25577.4	25819.4	26053.1	26278.2	26494.5	26701.8	26900	27089.2	27269.3	27440.4	27602.2	27754.9	27898.6
35	Low variant	Middle Africa		911	153743	158413	163120	167878	172694	177576	182527	187546	192630	197776	202977	208234	213548	218928	224387	229931	235563	241276	247061	252907	258804	264747	270732	276749	282790	288845	294909	300975	307039	313094	319135	325156	331155	337126	343070	348983	354862	360703	366503	372258	377966	383621	389223	394769	400260
36	Low variant	Angola		24	27859.3	28775.6	29702.5	30642.4	31597.1	32568.2	33556.4	34562.1	35585	36624.8	37681	38753.6	39843.2	40951.3	42080	43230.6	44403.2	45597.1	46810.9	48042.7	49290.6	50554	51832.2	53123.9	54427.8	55742.4	57066.8	58400.1	59741	61088.4	62441.4	63798.8	65160	66524.3	67891	69259.6	70629.4	71999.7	73370	74739.9	76108.9	77476.4	78841.7	80204.4	81564.2
37	Low variant	Cameroon		120	22834.5	23413.8	23992.3	24572	25154.1	25739.8	26329.5	26923.2	27520.7	28121.3	28724.5	29330.2	29938.9	30552.2	31172.2	31800.1	32436.4	33080.4	33731.2	34387.4	35047.6	35711.4	36378.4	37048.1	37719.7	38392.5	39065.9	39739.2	40411.7	41082.6	41751.1	42416.6	43078.6	43736.6	44390.2	45039	45682.5	46320.3	46952	47577.1	48195.2	48805.9	49409.1	50004.5	50592.2
38	Low variant	Central African Republic		140	4546.1	4594.35	4652.73	4720.61	4797.23	4881.67	4972.79	5069.32	5169.86	5272.97	5377.32	5482.02	5586.73	5691.79	5797.94	5905.66	6014.82	6124.86	6235.37	6345.81	6455.75	6564.99	6673.44	6780.94	6887.4	6992.72	7096.78	7199.47	7300.75	7400.62	7499.05	7596	7691.41	7785.35	7877.9	7969.12	8058.97	8147.41	8234.42	8319.95	8403.95	8486.38	8567.16	8646.23	8723.46
39	Low variant	Chad		148	14009.4	14432.3	14858.1	15287.8	15721.8	16160.4	16603.6	17051.3	17503.1	17958.3	18416.7	18877.8	19341.8	19809.4	20281.4	20758.3	21240.4	21727	22217.4	22710.8	23206.4	23703.7	24202.4	24702.1	25202.3	25702.3	26201.8	26700.5	27197.8	27693.4	28186.9	28678	29166.2	29651.4	30133.3	30611.7	31086.3	31556.7	32022.7	32484.1	32940.5	33391.8	33837.5	34277.3	34711.1
40	Low variant	Congo		178	4995.65	5123.59	5251.4	5379.71	5509.05	5639.82	5772.31	5906.69	6043.06	6181.38	6321.66	6463.93	6608.35	6755.26	6905	7057.83	7213.8	7372.69	7534.16	7697.72	7862.93	8029.62	8197.63	8366.55	8535.91	8705.31	8874.55	9043.49	9211.95	9379.85	9547.08	9713.5	9879.07	10043.9	10208	10371.6	10534.6	10697.1	10859	11020.5	11181.5	11342	11502.1	11661.6	11820.6
41	Low variant	Democratic Republic of the Congo		180	76196.6	78681	81181.3	83704.8	86257.2	88842.6	91463.3	94120.1	96812.2	99537.8	102295	105084	107906	110765	113667	116616	119612	122652	125732	128844	131983	135147	138332	141533	144744	147959	151175	154388	157596	160795	163982	167155	170310	173447	176564	179660	182733	185781	188802	191794	194754	197680	200572	203428	206249
42	Low variant	Equatorial Guinea		226	1175.39	1220.21	1264.69	1308.73	1352.29	1395.34	1437.92	1480.04	1521.79	1563.26	1604.51	1645.62	1686.56	1727.27	1767.66	1807.63	1847.16	1886.31	1925.26	1964.24	2003.44	2042.9	2082.54	2122.24	2161.78	2201.02	2239.91	2278.46	2316.61	2354.34	2391.61	2428.37	2464.59	2500.33	2535.62	2570.5	2604.96	2638.98	2672.49	2705.44	2737.79	2769.51	2800.59	2830.97	2860.63
43	Low variant	Gabon		266	1930.17	1972.39	2013.56	2053.84	2093.39	2132.31	2170.69	2208.56	2245.94	2282.87	2319.31	2355.3	2390.94	2426.32	2461.6	2496.93	2532.32	2567.76	2603.22	2638.64	2673.96	2709.16	2744.22	2779.08	2813.69	2847.99	2881.92	2915.45	2948.48	2980.96	3012.81	3043.99	3074.44	3104.1	3132.94	3160.89	3187.91	3213.99	3239.09	3263.2	3286.29	3308.36	3329.4	3349.43	3368.48
44	Low variant	Sao Tome and Principe		678	195.553	199.684	203.801	207.91	212.024	216.143	220.294	224.447	228.638	232.843	237.067	241.31	245.576	249.863	254.183	258.533	262.91	267.309	271.718	276.128	280.522	284.889	289.229	293.533	297.799	302.026	306.195	310.317	314.374	318.368	322.292	326.14	329.923	333.622	337.256	340.822	344.329	347.765	351.126	354.41	357.613	360.736	363.771	366.731	369.617
45	Low variant	Northern Africa		912	225136	229125	232965	236677	240280	243786	247204	250536	253783	256941	260008	262985	265885	268726	271535	274330	277119	279899	282668	285418	288145	290848	293524	296164	298755	301287	303756	306156	308483	310731	312895	314972	316957	318848	320644	322342	323941	325440	326841	328144	329353	330466	331486	332416	333261
46	Low variant	Algeria		12	39871.5	40549.9	41190.8	41797.7	42373.1	42919.3	43437.4	43928.2	44391.9	44828.2	45237.1	45619.5	45977.7	46315.6	46638.2	46949.5	47251.1	47543.9	47828.8	48106.6	48377.7	48642.8	48902.5	49156.8	49405.6	49648.4	49885.2	50115.3	50337.6	50550.5	50752.8	50943.6	51122.1	51286.1	51433.5	51562.1	51671.3	51760.6	51829.2	51876.7	51902.7	51907	51889.7	51851.8	51794.6
47	Low variant	Egypt		818	93778.2	95567.4	97269.6	98899	100467	101983	103454	104883	106273	107624	108936	110212	111459	112686	113906	115130	116361	117598	118838	120078	121315	122547	123773	124985	126172	127327	128446	129526	130566	131563	132514	133419	134275	135083	135843	136556	137222	137840	138414	138944	139433	139881	140289	140659	140993
48	Low variant	Libya		434	6234.95	6316.18	6392.4	6464.09	6531.61	6595.23	6655.12	6711.37	6763.98	6812.88	6858.05	6899.58	6937.71	6972.89	7005.71	7036.63	7065.83	7093.31	7119.08	7143.08	7165.25	7185.59	7204.11	7220.77	7235.48	7248.13	7258.67	7267.02	7272.93	7276.14	7276.43	7273.7	7267.91	7258.92	7246.62	7230.89	7211.73	7189.16	7163.27	7134.15	7101.92	7066.68	7028.53	6987.74	6944.56
49	Low variant	Morocco		504	34803.3	35230.4	35633.9	36016.1	36378.9	36723.8	37051.4	37362.2	37656	37932.5	38191.4	38432.9	38658	38869.1	39068.7	39258.9	39440.7	39613.8	39777.6	39931	40073.1	40204	40323.8	40432.2	40528.9	40613.6	40686.1	40746.3	40794.1	40829	40850.9	40859.8	40855.6	40838.6	40808.9	40766.8	40712.5	40646	40567.3	40476.6	40374	40259.6	40133.7	39996.4	39848.2
50	Low variant	Sudan		729	38647.8	39530.6	40424.9	41332.1	42252.6	43186.4	44132.4	45088.9	46053.5	47023.5	47996.4	48970.8	49947	50927	51914.3	52911	53917.4	54931.8	55952.7	56977.7	58004.9	59033.4	60062.4	61090.5	62116	63137.5	64153.9	65164.1	66167.3	67162.4	68148.5	69124.7	70090.5	71045.2	71988.5	72919.9	73839	74745.4	75638.9	76519.5	77387.1	78241.4	79082.2	79909.6	80723.8
51	Low variant	Tunisia		788	11273.7	11390.9	11500.3	11602.5	11698	11786.9	11869.6	11946	12016	12079.5	12136.3	12186.7	12231	12270	12304.8	12336.2	12364.6	12390.1	12412.9	12433.1	12451	12466.5	12479.9	12491.1	12500.2	12507.1	12511.8	12514.2	12514.2	12511.2	12505.1	12495.7	12483	12466.8	12446.7	12422.7	12394.5	12362.3	12326	12285.7	12241.4	12193.2	12141.2	12085.5	12026.6
52	Low variant	Western Sahara		732	526.216	539.692	552.956	566.019	578.903	591.622	604.15	616.498	628.649	640.572	652.244	663.687	674.88	685.871	696.69	707.373	717.926	728.349	738.618	748.724	758.647	768.386	777.942	787.311	796.495	805.489	814.295	822.9	831.299	839.495	847.488	855.269	862.827	870.132	877.15	883.86	890.241	896.318	902.058	907.47	912.568	917.348	921.798	925.945	929.788
53	Low variant	Southern Africa		913	63419.6	64200.1	64935.3	65631.2	66292	66920.9	67519.6	68088.3	68626.3	69132.1	69604.4	70043.6	70452.5	70836.9	71204.5	71560.8	71908.3	72246.2	72573.6	72888.1	73187.8	73472.7	73743.4	73998.7	74237.5	74458.7	74661.7	74846.3	75011.4	75156.1	75279.4	75381.1	75461	75519.3	75556.3	75572.4	75567.6	75542	75496.3	75431	75346.6	75243.5	75122	74982.9	74826.9
54	Low variant	Botswana		72	2209.2	2247.92	2285.41	2321.8	2357.18	2391.63	2425.18	2457.8	2489.45	2520.07	2549.6	2578.02	2605.41	2631.93	2657.78	2683.12	2708.01	2732.41	2756.3	2779.6	2802.23	2824.21	2845.52	2866.11	2885.97	2905.04	2923.28	2940.67	2957.16	2972.7	2987.22	3000.7	3013.11	3024.43	3034.62	3043.64	3051.48	3058.14	3063.63	3067.95	3071.11	3073.13	3074.01	3073.78	3072.45
55	Low variant	Lesotho		426	2174.64	2201.63	2227.26	2251.78	2275.36	2298.14	2320.18	2341.54	2362.2	2382.12	2401.3	2419.74	2437.57	2454.96	2472.18	2489.4	2506.71	2524.09	2541.48	2558.79	2575.94	2592.93	2609.75	2626.36	2642.74	2658.8	2674.55	2689.93	2704.9	2719.38	2733.34	2746.71	2759.49	2771.65	2783.17	2794.04	2804.24	2813.74	2822.48	2830.44	2837.56	2843.82	2849.22	2853.74	2857.37
56	Low variant	Namibia		516	2425.56	2476.28	2525.96	2574.73	2622.72	2670.01	2716.67	2762.7	2808.09	2852.82	2896.87	2940.24	2982.99	3025.24	3067.18	3108.92	3150.49	3191.88	3233.02	3273.84	3314.27	3354.28	3393.86	3432.97	3471.55	3509.57	3546.98	3583.74	3619.77	3655.01	3689.36	3722.81	3755.29	3786.77	3817.16	3846.43	3874.53	3901.44	3927.13	3951.6	3974.83	3996.79	4017.48	4036.91	4055.1
57	Low variant	South Africa		710	55291.2	55932.7	56533.5	57098.8	57632.4	58137.2	58614.6	59064.8	59487.1	59880.2	60243.1	60575.9	60881.2	61164.4	61432.1	61689.5	61938.7	62179.2	62410	62629.1	62834.8	63027.4	63207.1	63373.3	63524.8	63660.7	63780.7	63884.5	63971.3	64040.4	64091.2	64123.4	64137	64132.4	64109.9	64069.9	64012.7	63938.4	63847.7	63741.1	63619.3	63482.6	63331.4	63166.4	62988.2
58	Low variant	Swaziland		748	1319.01	1341.52	1363.17	1384.06	1404.29	1423.93	1443	1461.52	1479.47	1496.83	1513.57	1529.68	1545.25	1560.38	1575.2	1589.84	1604.35	1618.7	1632.86	1646.81	1660.5	1673.93	1687.09	1699.95	1712.46	1724.57	1736.26	1747.52	1758.3	1768.57	1778.29	1787.45	1796.03	1804.03	1811.45	1818.31	1824.59	1830.28	1835.38	1839.9	1843.83	1847.17	1849.94	1852.11	1853.71
59	Low variant	Western Africa		914	352614	361850	371123	380461	389889	399423	409072	418839	428723	438716	448813	459012	469324	479767	490369	501147	512105	523234	534517	545933	557461	569093	580821	592630	604505	616428	628389	640377	652378	664378	676365	688329	700259	712149	723993	735784	747515	759179	770768	782275	793695	805019	816243	827365	838382
60	Low variant	Benin		204	10576	10862.7	11150.3	11439.6	11731.1	12025	12321.5	12620.5	12921.9	13225.3	13530.4	13837.1	14145.7	14456.6	14770.7	15088.4	15409.8	15734.6	16062.4	16392.6	16724.7	17058.5	17393.7	17729.7	18066.1	18402.2	18737.8	19072.4	19405.8	19737.5	20067.1	20394.4	20719.2	21041.4	21360.9	21677.6	21991.5	22302.4	22610.2	22914.8	23216.2	23514.2	23808.7	24099.8	24387.4
61	Low variant	Burkina Faso		854	18110.6	18627.6	19147.5	19671.7	20201.4	20737.3	21279.8	21828.9	22384.6	22946.4	23513.9	24087	24665.9	25251.6	25845.1	26447.3	27058.2	27677.1	28303.1	28934.8	29571.1	30211.4	30855.1	31501.3	32148.8	32796.7	33444.2	34090.8	34735.5	35377.4	36015.8	36650.1	37279.8	37904.8	38525.2	39141	39751.9	40357.5	40957.4	41551.2	42138.5	42719	43292.5	43858.8	44418.1
62	Low variant	Cabo Verde		132	532.913	538.975	544.815	550.467	555.953	561.286	566.464	571.495	576.363	581.071	585.606	589.956	594.141	598.166	602.074	605.874	609.568	613.154	616.619	619.92	623.034	625.957	628.7	631.238	633.58	635.706	637.617	639.312	640.789	642.051	643.098	643.936	644.564	644.963	645.146	645.113	644.853	644.367	643.672	642.771	641.668	640.356	638.844	637.141	635.232
63	Low variant	Côte d'Ivoire		384	23108.5	23666.8	24229.2	24797.2	25372	25954.3	26544.4	27142	27746.6	28357.3	28973.4	29594.5	30221.1	30854.6	31497.1	32149.8	32813	33486.1	34168	34857.1	35552.2	36252.8	36958.5	37668.7	38382.5	39099.2	39818.1	40538.8	41260.7	41983.5	42706.7	43429.9	44152.6	44874.4	45594.8	46313.5	47029.9	47743.7	48454.8	49163.3	49868.9	50571.3	51270.2	51964.7	52654.2
64	Low variant	Gambia		270	1977.59	2036.39	2095.45	2154.88	2214.76	2275.14	2336.01	2397.36	2459.12	2521.21	2583.55	2646.09	2708.87	2771.94	2835.45	2899.45	2963.95	3028.85	3094.06	3159.42	3224.81	3290.16	3355.42	3420.45	3485.12	3549.33	3612.99	3676.02	3738.34	3799.83	3860.43	3920.05	3978.66	4036.19	4092.61	4147.89	4201.99	4254.85	4306.48	4356.85	4405.93	4453.72	4500.19	4545.33	4589.14
65	Low variant	Ghana		288	27582.8	28174.4	28756.4	29331.1	29900.1	30464.7	31025.5	31582.7	32136	32684.9	33228.9	33768	34303	34835.9	35368.9	35903.7	36441.1	36980.3	37520.5	38060.3	38598.5	39134.5	39668.2	40199.1	40726.6	41250.2	41769.4	42283.2	42790.5	43289.8	43779.9	44260.2	44730	45188.5	45634.9	46068.4	46488.5	46895	47288.1	47667.9	48034.9	48388.9	48729.9	49058.4	49374.8
66	Low variant	Guinea		324	12091.5	12392.1	12696.7	13005.8	13319.7	13638.4	13961.7	14289.1	14620.1	14954	15290.1	15628.1	15968	16310.4	16656.1	17005.7	17359.2	17716.1	18076	18437.9	18801.2	19165.7	19531.1	19897.1	20263.3	20629.4	20995.1	21360	21723.7	22086.1	22446.6	22805.1	23161.2	23514.6	23865	24211.9	24555.2	24894.7	25230.1	25561.4	25888.6	26211.4	26529.7	26843.1	27151.4
67	Low variant	Guinea-Bissau		624	1770.53	1813.62	1856.38	1898.93	1941.37	1983.77	2026.14	2068.48	2110.72	2152.83	2194.72	2236.38	2277.89	2319.38	2361.04	2403.01	2445.32	2487.95	2530.85	2573.97	2617.25	2660.67	2704.2	2747.77	2791.27	2834.64	2877.8	2920.71	2963.3	3005.46	3047.12	3088.23	3128.76	3168.62	3207.8	3246.23	3283.88	3320.75	3356.79	3392.02	3426.44	3460.01	3492.74	3524.63	3555.71
68	Low variant	Liberia		430	4499.62	4610.5	4721.84	4833.91	4946.93	5061.03	5176.29	5292.66	5410.1	5528.48	5647.66	5767.62	5888.39	6010.17	6133.22	6257.69	6383.6	6510.81	6639.07	6768.05	6897.48	7027.21	7157.18	7287.23	7417.21	7546.96	7676.38	7805.33	7933.69	8061.31	8188.08	8313.89	8438.66	8562.36	8684.98	8806.48	8926.83	9045.92	9163.73	9280.16	9395.17	9508.68	9620.65	9731.05	9839.87
69	Low variant	Mali		466	17467.9	17985.4	18509.2	19040.9	19581.4	20131.5	20691.7	21262.2	21842.9	22433.4	23033.5	23642.9	24261.8	24890.6	25530.1	26180.4	26841.5	27512.5	28192.2	28878.8	29570.8	30267.4	30968	31671.3	32376.2	33081.5	33786.4	34490.1	35191.7	35890.5	36585.6	37276.4	37962.4	38643.5	39319.8	39991.3	40657.7	41318.4	41973.1	42621.2	43262.2	43895.7	44521.4	45139.1	45748.7
70	Low variant	Mauritania		478	4182.34	4295.54	4408.23	4520.69	4633.14	4745.73	4858.49	4971.38	5084.29	5197.05	5309.54	5421.69	5533.63	5645.65	5758.18	5871.5	5985.69	6100.64	6216.23	6332.21	6448.42	6564.77	6681.23	6797.66	6913.92	7029.86	7145.38	7260.38	7374.72	7488.24	7600.86	7712.44	7822.9	7932.13	8040.02	8146.46	8251.38	8354.73	8456.47	8556.63	8655.19	8752.11	8847.34	8940.89	9032.73
71	Low variant	Niger		562	19897	20652.8	21429.6	22229.6	23054.5	23905.8	24784.4	25690.9	26625.5	27588.2	28579	29598.1	30646.4	31725.3	32836.6	33981.6	35160.7	36373.6	37619.5	38897.4	40206.3	41545.7	42915.3	44314.5	45742.3	47197.8	48680.5	50189.4	51723.7	53282.6	54864.9	56469.9	58096.6	59744.3	61412.2	63099.4	64804.9	66527.8	68266.9	70021.3	71789.7	73571.1	75364.1	77167.7	78980.5
72	Low variant	Nigeria		566	181182	185808	190447	195115	199825	204587	209407	214286	219226	224224	229277	234385	239554	244793	250118	255536	261050	266655	272343	278101	283921	289796	295724	301696	307703	313735	319787	325853	331927	338001	344070	350126	356167	362188	368185	374155	380095	386000	391866	397688	403462	409183	414851	420463	426021
73	Low variant	Saint Helena	3	654	4.034	4.046	4.057	4.071	4.079	4.094	4.102	4.113	4.12	4.128	4.131	4.134	4.134	4.14	4.14	4.137	4.13	4.124	4.112	4.103	4.092	4.076	4.063	4.04	4.021	4.001	3.974	3.951	3.934	3.905	3.882	3.859	3.829	3.806	3.778	3.747	3.719	3.694	3.673	3.635	3.608	3.579	3.55	3.522	3.493
74	Low variant	Senegal		686	14977	15393.8	15808.9	16223.7	16639.1	17056.1	17475	17896.1	18319.1	18743.8	19169.9	19597.4	20027	20459.7	20897.1	21340.4	21789.7	22244.9	22705.5	23170.8	23640.1	24113.3	24590	25069.7	25551.7	26035.2	26519.8	27005	27490.1	27974.2	28456.7	28936.9	29414.7	29889.3	30360.5	30827.8	31290.9	31749.5	32203.5	32652.7	33097.2	33536.6	33970.9	34400.2	34824.4
75	Low variant	Sierra Leone		694	7237.02	7389.69	7539.76	7687.66	7833.77	7978.31	8121.45	8263.25	8403.69	8542.69	8680.16	8816.09	8950.59	9083.92	9216.42	9348.3	9479.62	9610.19	9739.74	9867.88	9994.25	10118.7	10241.2	10361.4	10479	10593.9	10705.8	10814.6	10920.1	11022.2	11120.8	11215.7	11306.8	11394.2	11477.9	11557.9	11634	11706.4	11774.9	11839.4	11899.8	11956.1	12008.2	12056.3	12100.4
76	Low variant	Togo		768	7416.8	7597.92	7777.54	7956.33	8134.78	8313.31	8492.14	8671.41	8851.12	9031.21	9211.59	9392.26	9573.4	9755.37	9938.63	10123.5	10310	10498	10687	10876.6	11066.1	11255.5	11444.6	11633	11820.5	12006.5	12191	12373.7	12554.4	12732.7	12908.3	13081.2	13251.1	13418.2	13582.5	13744.1	13903	14059.1	14212.2	14362.3	14509.2	14652.9	14793.4	14930.7	15064.9
77	Low variant	ASIA		935	4.4199e+06	4.45704e+06	4.49146e+06	4.52345e+06	4.55323e+06	4.58096e+06	4.60674e+06	4.63061e+06	4.65254e+06	4.67251e+06	4.69046e+06	4.70642e+06	4.72052e+06	4.73301e+06	4.74421e+06	4.75435e+06	4.76354e+06	4.77175e+06	4.77889e+06	4.78481e+06	4.7894e+06	4.79264e+06	4.79457e+06	4.79516e+06	4.79436e+06	4.79216e+06	4.78853e+06	4.78347e+06	4.77693e+06	4.76889e+06	4.7593e+06	4.74818e+06	4.73554e+06	4.72138e+06	4.70575e+06	4.68866e+06	4.67014e+06	4.65024e+06	4.62899e+06	4.60648e+06	4.58277e+06	4.55791e+06	4.53194e+06	4.50492e+06	4.47696e+06
78	Low variant	Eastern Asia		906	1.63515e+06	1.64003e+06	1.6438e+06	1.64656e+06	1.64841e+06	1.6494e+06	1.64959e+06	1.64903e+06	1.64774e+06	1.64572e+06	1.643e+06	1.6396e+06	1.63558e+06	1.63101e+06	1.62597e+06	1.62056e+06	1.61479e+06	1.60868e+06	1.60222e+06	1.59536e+06	1.5881e+06	1.58044e+06	1.57239e+06	1.56395e+06	1.55512e+06	1.54591e+06	1.53631e+06	1.52633e+06	1.51596e+06	1.50519e+06	1.49401e+06	1.48242e+06	1.47045e+06	1.45809e+06	1.44534e+06	1.43223e+06	1.41876e+06	1.40495e+06	1.39084e+06	1.37645e+06	1.36182e+06	1.34697e+06	1.33193e+06	1.31673e+06	1.30143e+06
79	Low variant	China	4	156	1.39703e+06	1.40187e+06	1.40572e+06	1.40868e+06	1.41081e+06	1.41218e+06	1.41284e+06	1.41283e+06	1.41215e+06	1.41082e+06	1.40886e+06	1.40629e+06	1.40315e+06	1.39951e+06	1.39546e+06	1.39106e+06	1.38635e+06	1.38132e+06	1.37597e+06	1.37028e+06	1.36422e+06	1.3578e+06	1.35104e+06	1.34393e+06	1.33646e+06	1.32865e+06	1.32048e+06	1.31196e+06	1.30309e+06	1.29384e+06	1.28421e+06	1.27421e+06	1.26385e+06	1.25313e+06	1.24206e+06	1.23064e+06	1.2189e+06	1.20686e+06	1.19453e+06	1.18196e+06	1.16918e+06	1.1562e+06	1.14306e+06	1.12978e+06	1.11641e+06
80	Low variant	China, Hong Kong SAR	5	344	7245.7	7304.78	7356.55	7401.14	7438.92	7470.51	7496.86	7519.15	7538.77	7557.21	7575.75	7595.14	7615.31	7635.27	7653.39	7668.51	7680.41	7689.5	7695.87	7699.79	7701.46	7700.85	7697.94	7692.88	7685.9	7677.19	7666.81	7654.78	7641.17	7625.97	7609.21	7590.96	7571.28	7550.1	7527.41	7503.15	7477.35	7450.12	7421.57	7391.85	7361.11	7329.4	7296.79	7263.37	7229.24
81	Low variant	China, Macao SAR	6	446	600.942	610.066	619.022	627.793	636.396	644.815	653.048	661.062	668.867	676.421	683.711	690.737	697.5	704.013	710.302	716.389	722.271	727.958	733.441	738.702	743.758	748.6	753.221	757.645	761.886	765.938	769.81	773.503	777.023	780.398	783.622	786.711	789.66	792.442	795.06	797.476	799.694	801.731	803.579	805.237	806.721	808.024	809.168	810.131	810.933
82	Low variant	China, Taiwan Province of China		158	23485.8	23530.7	23563.3	23585.2	23597.5	23601.4	23597.3	23585.7	23566.7	23540.1	23505.8	23464	23415.2	23360.2	23300.4	23236.6	23169.2	23097.8	23021.4	22938.6	22848.2	22750	22644.3	22531	22410	22281.5	22145.4	22001.8	21851.1	21693.7	21530	21360.3	21184.8	21003.7	20817	20625.1	20428.1	20226.4	20020.5	19811	19598.3	19382.8	19164.7	18944.6	18722.8
83	Low variant	Dem. People's Republic of Korea		408	25243.9	25339	25422.5	25495.4	25558.3	25612	25656.8	25692.9	25720.4	25739.1	25749.1	25750.5	25743.8	25729.7	25709.3	25683.4	25652.3	25615.9	25574.1	25526.4	25472.4	25412.2	25345.8	25273.3	25194.5	25109.5	25018.4	24921	24817.1	24706.4	24588.7	24464	24332.5	24194.5	24050.1	23899.7	23743.5	23581.7	23415.2	23244.6	23070.7	22893.9	22714.5	22532.9	22349.5
84	Low variant	Japan		392	127975	127621	127203	126728	126201	125628	125012	124356	123662	122931	122165	121366	120537	119684	118814	117933	117044	116147	115243	114331	113408	112477	111539	110595	109648	108699	107748	106797	105845	104893	103943	102993	102045	101097	100149	99198.5	98246.9	97293.1	96334.6	95368.8	94393.5	93408.3	92413.4	91408.4	90393.3
85	Low variant	Mongolia		496	2976.88	3022.49	3065.12	3105.05	3142.46	3177.57	3210.46	3241.23	3269.93	3296.59	3321.24	3343.97	3364.93	3384.39	3402.65	3419.98	3436.51	3452.28	3467.36	3481.76	3495.51	3508.65	3521.24	3533.29	3544.83	3555.84	3566.34	3576.28	3585.67	3594.46	3602.61	3610.09	3616.85	3622.74	3627.59	3631.23	3633.63	3634.78	3634.6	3633.03	3630.05	3625.62	3619.8	3612.68	3604.37
86	Low variant	Republic of Korea		410	50593.7	50732.5	50848.7	50944.2	51021	51080.3	51123.3	51150.6	51162.5	51159	51140.1	51106	51057.3	50995	50920.4	50834.2	50737.1	50628.5	50506.6	50368.8	50213.4	50039.8	49848.3	49639.6	49414.6	49173.9	48917.8	48646	48358.8	48056.2	47738.5	47405.9	47059	46697.4	46321.1	45930	45524.6	45105.9	44675	44233.2	43781.9	43322	42854.4	42381	41904
87	Low variant	South-Central Asia	7	921	1.89201e+06	1.91353e+06	1.93399e+06	1.95351e+06	1.97218e+06	1.99005e+06	2.00715e+06	2.02347e+06	2.03897e+06	2.05363e+06	2.06738e+06	2.08024e+06	2.09224e+06	2.1035e+06	2.11417e+06	2.12436e+06	2.13411e+06	2.14339e+06	2.15216e+06	2.16033e+06	2.16784e+06	2.17468e+06	2.18085e+06	2.18633e+06	2.19109e+06	2.19512e+06	2.1984e+06	2.20093e+06	2.20268e+06	2.20364e+06	2.20381e+06	2.20318e+06	2.20175e+06	2.19954e+06	2.19656e+06	2.19283e+06	2.18837e+06	2.18317e+06	2.17726e+06	2.17068e+06	2.16343e+06	2.15554e+06	2.14702e+06	2.13789e+06	2.12817e+06
88	Low variant	Central Asia		5500	68705	69692.5	70617.3	71486.5	72306.1	73080.3	73812	74502.5	75151.7	75759	76323.9	76847.6	77334.1	77790.7	78226.3	78648.1	79058.9	79458.8	79848	80225.4	80590.2	80942.7	81283	81609.5	81919.8	82211.6	82484.2	82736.6	82966.1	83169.5	83344.5	83490	83605.4	83690.2	83744	83766.7	83758	83718.3	83648.5	83550.1	83424.5	83272.4	83094.5	82892.5	82668.4
89	Low variant	Kazakhstan		398	17749.6	17949.5	18132.7	18301.4	18457	18600.9	18733.9	18856.7	18969.7	19072.9	19166.7	19251.6	19328.6	19399.6	19466.5	19531.1	19594.2	19656	19716.8	19776.4	19834.8	19892.3	19949	20004.7	20059.1	20111.8	20162.7	20211.6	20257.9	20301	20340.2	20375.4	20406.3	20432.3	20452.8	20467.4	20475.8	20478	20474	20463.7	20447.4	20424.9	20396.4	20362.5	20323.6
90	Low variant	Kyrgyzstan		417	5865.4	5950.48	6029.85	6104.24	6174.23	6240.25	6302.6	6361.45	6416.85	6468.76	6517.18	6562.23	6604.28	6643.97	6682.09	6719.25	6755.72	6791.47	6826.48	6860.59	6893.69	6925.78	6956.89	6986.79	7015.2	7041.87	7066.75	7089.73	7110.66	7129.35	7145.63	7159.44	7170.73	7179.56	7185.98	7190.04	7191.78	7191.17	7188.29	7183.18	7175.89	7166.46	7154.96	7141.5	7126.2
91	Low variant	Tajikistan		762	8548.65	8725.54	8896.7	9062.95	9224.92	9382.98	9537.33	9687.88	9834.42	9976.59	10114.1	10247	10375.8	10501.5	10625.4	10748.7	10871.5	10994	11116.2	11238	11359.5	11480.7	11601.4	11721.2	11839.6	11956	12070.1	12181.9	12290.4	12395	12494.9	12589.9	12680	12764.9	12844.8	12919.8	12989.6	13054.5	13114.5	13170.2	13221.7	13269.2	13312.8	13352.7	13389.3
92	Low variant	Turkmenistan		795	5565.28	5656.33	5741.96	5822.78	5899.23	5971.64	6040.22	6105.06	6166.12	6223.35	6276.67	6326.19	6372.27	6415.51	6456.71	6496.5	6535.14	6572.63	6609.07	6644.5	6678.89	6712.32	6744.77	6776.07	6805.99	6834.27	6860.83	6885.59	6908.29	6928.61	6946.31	6961.27	6973.44	6982.73	6989.03	6992.3	6992.51	6989.69	6983.96	6975.51	6964.54	6951.1	6935.29	6917.25	6897.17
93	Low variant	Uzbekistan		860	30976	31410.7	31816	32195.1	32550.7	32884.6	33198	33491.4	33764.7	34017.4	34249.2	34460.6	34653.2	34830.2	34995.6	35152.6	35302.3	35444.7	35579.5	35705.9	35823.2	35931.5	36030.9	36120.7	36199.9	36267.7	36323.8	36367.8	36398.8	36415.6	36417.4	36403.9	36374.9	36330.7	36271.4	36197.2	36108.3	36004.9	35887.7	35757.5	35615	35460.7	35295	35118.6	34932.1
94	Low variant	Southern Asia		5501	1.82331e+06	1.84384e+06	1.86337e+06	1.88203e+06	1.89987e+06	1.91697e+06	1.93333e+06	1.94896e+06	1.96382e+06	1.97787e+06	1.99106e+06	2.00339e+06	2.0149e+06	2.02571e+06	2.03594e+06	2.04571e+06	2.05505e+06	2.06393e+06	2.07231e+06	2.08011e+06	2.08725e+06	2.09373e+06	2.09956e+06	2.10472e+06	2.10917e+06	2.11291e+06	2.11592e+06	2.11819e+06	2.11971e+06	2.12048e+06	2.12047e+06	2.11969e+06	2.11815e+06	2.11585e+06	2.11282e+06	2.10907e+06	2.10461e+06	2.09945e+06	2.09362e+06	2.08713e+06	2.08001e+06	2.07227e+06	2.06393e+06	2.055e+06	2.0455e+06
95	Low variant	Afghanistan		4	33736.5	34563.1	35375.7	36176.2	36966	37745.9	38516.1	39276.1	40025.2	40762.1	41485.8	42195.9	42892.8	43578.3	44254.7	44923.6	45585.2	46238.7	46882.7	47515.3	48135	48741	49332.8	49909.2	50468.5	51009.7	51531.7	52034.1	52515.6	52975.3	53412.3	53826	54216.1	54582.7	54926	55246.2	55543.2	55816.9	56067.5	56295.3	56500.6	56683.4	56843.8	56981.8	57097.5
96	Low variant	Bangladesh		50	161201	162636	164029	165384	166701	167981	169216	170400	171523	172573	173540	174418	175211	175929	176588	177201	177770	178291	178762	179174	179524	179810	180033	180195	180294	180331	180306	180219	180068	179852	179572	179226	178815	178342	177808	177215	176564	175856	175093	174277	173409	172491	171525	170511	169450
97	Low variant	Bhutan		64	787.386	796.18	804.459	812.243	819.595	826.52	833.031	839.122	844.797	850.035	854.823	859.178	863.112	866.67	869.932	872.935	875.713	878.259	880.561	882.617	884.421	885.96	887.26	888.299	889.088	889.62	889.894	889.903	889.636	889.084	888.241	887.101	885.658	883.912	881.848	879.469	876.78	873.771	870.451	866.816	862.886	858.654	854.132	849.318	844.236
98	Low variant	India		356	1.30905e+06	1.32257e+06	1.33536e+06	1.3475e+06	1.35904e+06	1.37004e+06	1.3805e+06	1.39043e+06	1.39981e+06	1.40863e+06	1.41686e+06	1.4245e+06	1.43157e+06	1.43815e+06	1.44432e+06	1.45014e+06	1.45564e+06	1.4608e+06	1.46557e+06	1.46989e+06	1.4737e+06	1.477e+06	1.4798e+06	1.48207e+06	1.48382e+06	1.48503e+06	1.48571e+06	1.48584e+06	1.48543e+06	1.48449e+06	1.48303e+06	1.48103e+06	1.47853e+06	1.47551e+06	1.47202e+06	1.46806e+06	1.46364e+06	1.45878e+06	1.45349e+06	1.44777e+06	1.44166e+06	1.43515e+06	1.42825e+06	1.42098e+06	1.41335e+06
99	Low variant	Iran (Islamic Republic of)		364	79360.5	80161.9	80880.8	81526	82104.8	82623	83084.5	83491.7	83845.9	84147.2	84396.2	84595.1	84749.1	84866.7	84958.5	85032.7	85093.2	85140.7	85176.6	85200.8	85213.2	85214.7	85205.7	85185	85151	85101.6	85036.2	84952.9	84848	84716.6	84554.6	84360.3	84132.6	83869	83567.2	83225.4	82842.6	82418.5	81953.7	81449.1	80905.8	80324.2	79705.1	79050.6	78362.9
100	Low variant	Maldives		462	418.403	426.772	434.475	441.593	448.17	454.258	459.886	465.071	469.805	474.1	477.939	481.351	484.371	487.077	489.575	491.929	494.184	496.342	498.434	500.432	502.353	504.209	506.009	507.743	509.418	511.013	512.532	513.968	515.292	516.487	517.52	518.398	519.087	519.581	519.867	519.912	519.722	519.282	518.589	517.65	516.473	515.047	513.377	511.473	509.343
101	Low variant	Nepal		524	28656.3	28931.8	29195.8	29449.1	29692.2	29925.2	30147.6	30358.8	30557.6	30742.8	30913.4	31068.8	31209.5	31336.9	31453.4	31560.4	31658.5	31747.3	31826.3	31894.5	31951.2	31996.4	32030.3	32053.2	32065.1	32066.4	32057.1	32037.1	32006.5	31965	31912.7	31849.6	31775.8	31691.6	31597.5	31493.8	31380.6	31258	31125.9	30984.1	30832.7	30671.6	30500.9	30320.6	30130.8
102	Low variant	Pakistan		586	189381	192979	196478	199889	203223	206486	209677	212797	215838	218795	221662	224437	227127	229747	232318	234856	237365	239842	242285	244691	247057	249380	251659	253887	256052	258146	260166	262107	263962	265720	267375	268923	270361	271688	272902	274001	274986	275855	276613	277264	277815	278266	278617	278873	279035
103	Low variant	Sri Lanka		144	20714	20768.8	20813	20848.1	20874.8	20893.7	20904.9	20908.4	20903.6	20889.8	20866.6	20833.8	20792.2	20743.1	20688.7	20630.3	20568.7	20503.4	20434.4	20361.2	20283.5	20201.2	20114.4	20022.6	19925.4	19822.1	19712.9	19597.4	19475.5	19346.5	19210.3	19066.7	18915.9	18758.5	18594.9	18425.9	18251.6	18072.4	17888.6	17700.9	17509.5	17315	17117.6	16917.8	16715.9
104	Low variant	South-Eastern Asia		920	634610	640865	646766	652348	657637	662651	667402	671889	676110	680053	683712	687086	690193	693064	695743	698260	700630	702846	704897	706762	708426	709887	711147	712204	713053	713692	714119	714330	714320	714083	713612	712908	711972	710806	709413	707798	705963	703913	701655	699196	696546	693709	690693	687508	684164
105	Low variant	Brunei Darussalam		96	417.542	422.535	427.269	431.747	436.009	440.064	443.92	447.571	451.017	454.252	457.284	460.101	462.713	465.148	467.432	469.583	471.616	473.52	475.291	476.919	478.385	479.701	480.861	481.86	482.709	483.387	483.908	484.272	484.456	484.475	484.306	483.969	483.445	482.742	481.846	480.758	479.469	478.009	476.355	474.518	472.518	470.346	468.031	465.548	462.944
106	Low variant	Cambodia		116	15517.6	15731.2	15935.2	16130.8	16318.8	16499.7	16673.8	16840.8	17000.4	17152.1	17295.3	17430.1	17557.1	17677.5	17793.4	17905.9	18015.5	18122.2	18225.8	18325.9	18422.4	18515.1	18604.2	18689	18769.1	18843.9	18913.2	18976.9	19034.4	19085.1	19128.6	19164.5	19192.9	19213.8	19227.6	19234.3	19234	19226.7	19212.7	19192.2	19165.4	19132.5	19093.5	19048.7	18998.4
107	Low variant	Indonesia		360	258162	260760	263192	265477	267627	269653	271560	273350	275022	276572	277998	279300	280486	281571	282574	283509	284382	285191	285928	286584	287149	287622	288005	288296	288495	288599	288608	288521	288336	288051	287664	287176	286587	285900	285119	284246	283284	282235	281103	279893	278609	277253	275830	274344	272799
108	Low variant	Lao People's Democratic Republic		418	6663.97	6757.56	6846.73	6931.96	7013.57	7091.81	7166.8	7238.55	7306.99	7371.97	7433.37	7491.18	7545.58	7596.96	7645.88	7692.71	7737.58	7780.39	7820.94	7858.91	7894.04	7926.27	7955.63	7982	8005.25	8025.29	8042.07	8055.54	8065.65	8072.37	8075.64	8075.44	8071.8	8064.79	8054.52	8041.08	8024.52	8004.85	7982.14	7956.43	7927.78	7896.25	7861.88	7824.73	7784.87
109	Low variant	Malaysia	8	458	30723.2	31108	31481.4	31843.7	32195.2	32535.8	32864.9	33181.8	33485.7	33775.2	34049.6	34308.3	34551.7	34781.3	34998.8	35205.7	35402.5	35589.1	35765.1	35930.2	36083.9	36226.4	36358	36479.3	36590.6	36692.6	36785.2	36868.5	36942.7	37007.9	37064.2	37111.6	37150.1	37179.2	37198.5	37207.3	37205.8	37193.7	37170.9	37137.3	37092.7	37037	36970.2	36892.4	36804
110	Low variant	Myanmar		104	52403.7	52832.2	53233.3	53609.5	53962.4	54293.4	54603.2	54891.8	55159.1	55404.3	55627	55827.2	56005.7	56164.5	56306	56432.1	56543.4	56639.4	56718.9	56780	56821.2	56842.3	56843.5	56824.5	56784.8	56724.4	56643.1	56541	56418.3	56275.4	56112.8	55930.6	55729.3	55509.3	55271.5	55016.3	54744.4	54456.3	54152.7	53834.5	53502.4	53157.2	52799.2	52429.4	52048.4
111	Low variant	Philippines		608	101716	103177	104600	105988	107347	108677	109980	111255	112498	113709	114883	116020	117122	118193	119239	120266	121274	122263	123227	124162	125064	125931	126764	127562	128323	129047	129733	130380	130987	131554	132081	132567	133012	133417	133782	134109	134397	134646	134857	135028	135158	135248	135299	135310	135285
112	Low variant	Singapore		702	5535.26	5630.37	5711.72	5780.51	5838.06	5885.74	5925.04	5957.53	5984.83	6008.54	6030.08	6050.43	6070.01	6088.62	6105.57	6120.36	6133.18	6144.36	6153.8	6161.33	6166.81	6170.23	6171.58	6170.83	6167.93	6162.83	6155.52	6145.97	6134.24	6120.33	6104.28	6086.13	6065.9	6043.57	6019.1	5992.48	5963.76	5933.05	5900.51	5866.35	5830.78	5793.88	5755.75	5716.51	5676.3
113	Low variant	Thailand		764	68657.6	68776.2	68847.7	68877	68868.6	68826.3	68753.3	68652.1	68524.9	68373.3	68198.6	68002.4	67786.7	67553.9	67306.6	67046.9	66776.1	66494	66199.1	65888.9	65561.2	65215.8	64853.1	64473	64075.3	63660	63227	62776.3	62307.5	61820.5	61315.1	60791.7	60250.8	59693	59118.7	58528.7	57923.8	57305.1	56674.2	56033.3	55384.2	54728	54065.9	53399.5	52730.9
114	Low variant	Timor-Leste		626	1240.98	1266.67	1292.51	1318.53	1344.76	1371.24	1397.95	1424.89	1452.03	1479.34	1506.78	1534.31	1561.96	1589.74	1617.7	1645.86	1674.21	1702.71	1731.31	1759.9	1788.42	1816.86	1845.15	1873.27	1901.18	1928.83	1956.2	1983.25	2009.93	2036.18	2061.95	2087.2	2111.95	2136.23	2160.1	2183.62	2206.79	2229.59	2252.01	2274.06	2295.7	2316.94	2337.77	2358.2	2378.24
115	Low variant	Viet Nam		704	93571.6	94403.6	95199	95959.5	96685.7	97377.4	98032.9	98649.8	99224.4	99753.1	100233	100662	101043	101383	101688	101967	102219	102447	102651	102834	102997	103141	103266	103372	103459	103525	103572	103598	103600	103575	103520	103434	103316	103166	102980	102758	102499	102204	101873	101507	101108	100676	100212	99718.4	99196.5
116	Low variant	Western Asia		922	258124	262614	266907	271032	275012	278865	282599	286220	289724	293106	296361	299492	302512	305445	308327	311180	314016	316830	319613	322349	325024	327637	330188	332674	335090	337431	339695	341876	343970	345970	347871	349670	351365	352954	354433	355801	357058	358202	359235	360159	360975	361685	362289	362793	363199
117	Low variant	Armenia		51	2916.95	2919.37	2919.64	2917.98	2914.59	2909.6	2903.16	2895.35	2886.23	2875.84	2864.22	2851.45	2837.66	2823.02	2807.74	2792.02	2775.9	2759.45	2742.67	2725.56	2708.11	2690.35	2672.31	2653.95	2635.25	2616.17	2596.71	2576.85	2556.53	2535.65	2514.15	2492.01	2469.23	2445.83	2421.82	2397.21	2372.03	2346.27	2320.02	2293.3	2266.22	2238.77	2211.01	2182.95	2154.65
118	Low variant	Azerbaijan	9	31	9617.48	9713.5	9798.76	9874.52	9941.81	10001.5	10054.2	10100.5	10140.6	10174.6	10202.9	10225.6	10243.3	10256.9	10267.4	10275.5	10281.7	10285.9	10287.8	10287.1	10283.3	10276.4	10266.5	10253.5	10237	10216.7	10192.7	10164.9	10133.4	10098.2	10059.4	10017.1	9971.19	9921.97	9869.56	9814.17	9755.89	9694.85	9631.26	9565.4	9497.47	9427.62	9355.94	9282.56	9207.55
119	Low variant	Bahrain		48	1371.86	1455	1527.13	1588.8	1640.81	1684.19	1720.28	1750.65	1777.07	1801.39	1825.21	1849.59	1874.72	1899.78	1923.36	1944.42	1962.93	1979.42	1994.2	2007.68	2020.22	2031.89	2042.65	2052.6	2061.79	2070.26	2078.07	2085.27	2091.85	2097.78	2103.05	2107.66	2111.65	2115.02	2117.74	2119.81	2121.25	2122.05	2122.28	2121.93	2121.05	2119.66	2117.76	2115.34	2112.43
120	Low variant	Cyprus	10	196	1160.98	1169.3	1176.83	1183.69	1189.94	1195.66	1200.91	1205.71	1210.1	1214.09	1217.71	1220.98	1223.94	1226.67	1229.22	1231.67	1234.02	1236.3	1238.47	1240.53	1242.46	1244.25	1245.89	1247.38	1248.68	1249.78	1250.65	1251.28	1251.67	1251.77	1251.58	1251.06	1250.23	1249.05	1247.49	1245.54	1243.19	1240.44	1237.32	1233.86	1230.09	1226.04	1221.68	1217.05	1212.17
121	Low variant	Georgia	11	268	3951.52	3937.95	3922.44	3905.24	3886.58	3866.65	3845.54	3823.39	3800.26	3776.17	3751.18	3725.35	3698.79	3671.7	3644.31	3616.78	3589.2	3561.56	3533.85	3506.01	3477.99	3449.79	3421.42	3392.82	3363.95	3334.73	3305.17	3275.24	3244.86	3213.96	3182.47	3150.38	3117.71	3084.49	3050.82	3016.72	2982.25	2947.42	2912.27	2876.9	2841.35	2805.65	2769.85	2734.01	2698.16
122	Low variant	Iraq		368	36115.6	37132.9	38141	39143.6	40143.9	41144.2	42146.2	43150.8	44158.5	45169.1	46182.7	47199.7	48221.4	49250.2	50289	51339.8	52403.4	53478.9	54565.1	55659.9	56761.6	57869.3	58982.6	60099.5	61218	62336.4	63453.4	64568	65678.9	66784.6	67883.9	68975.8	70059.6	71134.7	72200.8	73257.7	74304.8	75341.6	76367.7	77382.8	78386.5	79378.2	80357.9	81326.2	82284
123	Low variant	Israel		376	8064.55	8187.32	8305.98	8421.2	8533.51	8643.31	8750.92	8856.51	8960.14	9061.82	9161.54	9259.42	9355.75	9451.05	9545.93	9640.87	9736.06	9831.46	9926.92	10022.2	10117.1	10211.5	10305.5	10398.9	10491.6	10583.4	10674.3	10764.1	10852.4	10939.2	11024	11106.8	11187.4	11265.6	11341.3	11414.3	11484.5	11551.9	11616.4	11678	11736.8	11792.6	11845.6	11895.9	11943.5
124	Low variant	Jordan		400	9159.3	9454.8	9690.31	9873.69	10012.8	10115.6	10189.9	10243.8	10285.1	10321.2	10358.8	10402.8	10456	10518.5	10589	10666.3	10751.4	10845.4	10947.3	11055.4	11168.2	11285.4	11406.2	11528.4	11649.2	11766.2	11878.4	11985.5	12087.6	12185.1	12278.3	12367	12450.6	12529.1	12602.3	12670.1	12732.5	12789.5	12841.3	12888.4	12930.9	12969.1	13003	13032.7	13058.6
125	Low variant	Kuwait		414	3935.79	4010.57	4080.18	4145	4205.41	4261.78	4314.55	4364.18	4411.1	4455.78	4498.62	4539.92	4579.85	4618.39	4655.4	4690.82	4724.71	4757.18	4788.32	4818.25	4847.02	4874.66	4901.1	4926.22	4949.84	4971.79	4992.07	5010.61	5027.26	5041.75	5053.95	5063.8	5071.33	5076.66	5079.96	5081.37	5080.97	5078.77	5074.91	5069.46	5062.53	5054.22	5044.63	5033.96	5022.39
126	Low variant	Lebanon		422	5851.48	5967.96	6028.99	6041.86	6014.06	5953.27	5867.5	5764.91	5653.8	5542.18	5436.99	5343.28	5263.3	5196.27	5139.25	5090.01	5049.16	5017.89	4994.82	4978.03	4965.83	4957.72	4953.14	4950.28	4947.01	4941.74	4933.5	4922.22	4908.31	4892.65	4875.93	4858.06	4838.71	4817.94	4795.82	4772.42	4747.76	4721.89	4694.86	4666.74	4637.6	4607.44	4576.28	4544.1	4510.85
127	Low variant	Oman		512	4199.81	4448.12	4660.68	4839.89	4988.63	5110.34	5209.01	5289.12	5355.58	5413.39	5466.99	5519.45	5571.84	5622.94	5669.99	5711.18	5746.76	5778.37	5807.01	5834.02	5860.4	5886.63	5912.65	5938.26	5963.03	5986.65	6009.07	6030.5	6051.2	6071.49	6091.59	6111.59	6131.22	6149.96	6167.06	6181.96	6194.43	6204.53	6212.25	6217.66	6220.83	6221.69	6220.18	6216.32	6210.16
128	Low variant	Qatar		634	2481.54	2549.69	2612.61	2670.73	2724.55	2774.49	2821	2864.54	2905.54	2944.38	2981.45	3017.02	3051.24	3084.18	3115.76	3145.96	3174.93	3202.77	3229.24	3254.07	3277.03	3298.08	3317.39	3335.35	3352.49	3369.2	3385.63	3401.7	3417.33	3432.35	3446.64	3460.2	3473.08	3485.2	3496.45	3506.8	3516.2	3524.66	3532.16	3538.74	3544.39	3549.14	3552.94	3555.85	3557.87
129	Low variant	Saudi Arabia		682	31557.1	32205.6	32809.5	33373.3	33900.6	34395	34859.4	35296.3	35707.9	36096	36462.1	36807.8	37134.8	37445	37740.3	38022.1	38291.9	38549.8	38794.2	39022.3	39232.4	39423.9	39598.1	39756.7	39902.8	40038.2	40163.4	40278	40381.2	40471.7	40548.8	40612.2	40662	40697.3	40717.4	40721.4	40709.2	40680.8	40636.2	40575.2	40498.1	40404.9	40296	40172.1	40034.1
130	Low variant	State of Palestine	12	275	4662.88	4784.77	4906.67	5028.77	5151.13	5273.74	5396.49	5519.17	5641.53	5763.24	5884.03	6003.77	6122.52	6240.57	6358.38	6476.3	6594.35	6712.42	6830.39	6948.06	7065.28	7182	7298.15	7413.62	7528.28	7641.99	7754.66	7866.18	7976.41	8085.16	8192.32	8297.75	8401.37	8503.1	8602.87	8700.59	8796.2	8889.63	8980.8	9069.66	9156.13	9240.16	9321.73	9400.83	9477.51
131	Low variant	Syrian Arab Republic		760	18735	18104	17831.3	17879	18203.9	18757.6	19485.8	20328.9	21223.8	22107.2	22924	23637.5	24237.3	24743.5	25195.8	25624.1	26027.7	26394.2	26730.1	27042.9	27338.4	27620.3	27889.8	28148.3	28396.3	28634	28863.1	29084.3	29296.3	29497.2	29685.1	29860.1	30022.6	30172.8	30311	30437.3	30551.8	30654.5	30745.8	30826.1	30895.9	30955.2	31004.4	31043.5	31072.8
132	Low variant	Turkey		792	78271.5	79743.5	80921.2	81841.4	82540.4	83054.3	83419.1	83670.5	83843.1	83970.3	84080.6	84195.6	84327.3	84476.9	84637.8	84804.8	84983.8	85179	85379.5	85569.4	85736.9	85877.8	85993.9	86085.5	86155	86203.8	86230.8	86233.7	86211.3	86162.1	86085	85979.5	85845.4	85682.5	85490.9	85270.7	85022	84744.9	84440.1	84107.8	83748.9	83363.8	82953.2	82518.5	82061.3
133	Low variant	United Arab Emirates		784	9154.3	9281.31	9404.27	9523.3	9638.53	9750.22	9858.66	9964.26	10067.5	10168.8	10268.6	10367.2	10464.6	10560.6	10654.9	10747	10837	10925	11011.2	11096	11179.8	11262.4	11343.8	11423.5	11501	11575.9	11648.2	11717.6	11783.9	11846.8	11905.8	11961	12012.2	12059.6	12103.2	12143.2	12179.6	12212.4	12241.7	12267.7	12290.5	12310.2	12326.9	12340.7	12351.9
134	Low variant	Yemen		887	26916.2	27548.5	28169.2	28779.7	29380.9	29973.1	30556.6	31131	31695.9	32250.3	32793.8	33325.9	33847.2	34358.9	34862.9	35360.4	35851.4	36335.6	36812.5	37281.7	37742.4	38194.4	38637.2	39069.2	39488.7	39894.2	40284.8	40660	41019.4	41362.5	41689	41998.3	42289.8	42562.7	42816.3	43049.9	43263.1	43455.8	43627.9	43779.4	43910.3	44020.7	44110.5	44179.9	44229.2
135	Low variant	EUROPE		908	740814	740840	740479	739773	738757	737466	735927	734164	732197	730043	727716	725234	722619	719894	717089	714224	711315	708368	705382	702353	699277	696156	692994	689790	686540	683244	679898	676500	673038	669501	665879	662168	658368	654469	650463	646344	642111	637769	633323	628784	624162	619462	614690	609860	604990
136	Low variant	Eastern Europe		923	293244	292514	291640	290635	289511	288280	286948	285523	284008	282406	280722	278960	277131	275247	273325	271379	269415	267438	265451	263458	261460	259462	257465	255472	253486	251507	249537	247574	245614	243650	241676	239691	237694	235681	233649	231594	229516	227412	225286	223136	220966	218775	216565	214337	212094
137	Low variant	Belarus		112	9485.77	9462.32	9435.02	9404.38	9370.73	9334.36	9295.4	9253.93	9209.88	9163.19	9113.8	9061.81	9007.49	8951.46	8894.41	8836.92	8779.26	8721.49	8663.69	8605.92	8548.18	8490.59	8433.2	8376.04	8319.06	8262.24	8205.57	8148.99	8092.31	8035.29	7977.72	7919.52	7860.68	7801.11	7740.7	7679.39	7617.15	7554	7490.02	7425.32	7360.01	7294.12	7227.72	7160.92	7093.89
138	Low variant	Bulgaria		100	7177.4	7122.82	7066.6	7008.88	6949.78	6889.39	6827.76	6764.9	6700.84	6635.55	6569.04	6501.35	6432.65	6363.17	6293.17	6222.94	6152.59	6082.2	6011.9	5941.81	5872.06	5802.69	5733.77	5665.39	5597.62	5530.51	5464.09	5398.33	5333.1	5268.19	5203.45	5138.84	5074.33	5009.84	4945.25	4880.49	4815.53	4750.36	4684.96	4619.38	4553.6	4487.66	4421.6	4355.48	4289.39
139	Low variant	Czechia		203	10603.8	10600.2	10592.6	10581.3	10566.4	10548	10526.1	10500.8	10472	10439.7	10403.8	10364.5	10322	10276.7	10229.3	10180.1	10129.4	10077.5	10024.5	9970.94	9916.96	9862.74	9808.43	9754.25	9700.43	9647.08	9594.31	9542.01	9489.99	9437.94	9385.58	9332.82	9279.55	9225.42	9170.03	9113.06	9054.36	8993.86	8931.47	8867.08	8800.64	8732.15	8661.63	8589.15	8514.83
140	Low variant	Hungary		348	9783.92	9741.66	9696.19	9647.82	9596.86	9543.5	9487.92	9430.23	9370.5	9308.79	9245.14	9179.63	9112.49	9043.99	8974.47	8904.22	8833.42	8762.11	8690.28	8617.88	8544.86	8471.27	8397.22	8322.86	8248.37	8173.85	8099.35	8024.89	7950.49	7876.13	7801.83	7727.58	7653.37	7579.07	7504.51	7429.57	7354.23	7278.48	7202.22	7125.38	7047.92	6969.81	6891.1	6811.84	6732.1
141	Low variant	Poland		616	38265.2	38175.5	38062.9	37929.6	37777.8	37609.2	37425.5	37228	37018	36796.4	36564.2	36322.3	36072	35814.4	35550.9	35282.6	35010.2	34734.1	34454.1	34169.9	33881.2	33588.1	33290.9	32989.8	32684.9	32376.1	32063.6	31747.5	31427.7	31104.1	30776.8	30445.9	30111.4	29773.4	29432.1	29087.7	28740.1	28389.5	28036.2	27680.3	27322.2	26962	26599.7	26235.3	25868.3
142	Low variant	Republic of Moldova	13	498	4065.98	4052.47	4036.65	4018.72	3998.87	3977.23	3953.94	3929.14	3902.89	3875.3	3846.44	3816.39	3785.28	3753.21	3720.35	3686.8	3652.64	3617.94	3582.68	3546.86	3510.45	3473.5	3436.05	3398.14	3359.81	3321.12	3282.07	3242.69	3202.94	3162.83	3122.33	3081.45	3040.22	2998.62	2956.68	2914.39	2871.77	2828.83	2785.57	2742.01	2698.16	2654.04	2609.67	2565.04	2520.18
143	Low variant	Romania		642	19876.6	19753.3	19627.5	19499.4	19369.3	19237.4	19103.9	18968.7	18831.8	18693.3	18553	18411	18267.5	18122.6	17977	17830.7	17683.9	17536.7	17388.8	17240.3	17091.1	16941	16790.2	16638.6	16485.9	16332.1	16177.2	16021.2	15863.8	15705	15544.8	15383	15219.7	15054.8	14888.5	14720.6	14551.2	14380.4	14208.3	14035	13860.4	13684.9	13508.5	13331.4	13154.1
144	Low variant	Russian Federation		643	143888	143782	143584	143304	142949	142526	142039	141494	140894	140242	139541	138795	138010	137193	136355	135503	134641	133774	132903	132031	131161	130293	129432	128577	127732	126897	126074	125260	124454	123649	122843	122035	121222	120404	119576	118738	117887	117023	116147	115258	114359	113448	112526	111595	110656
145	Low variant	Slovakia		703	5439.32	5436.23	5431.03	5423.78	5414.6	5403.52	5390.59	5375.78	5359.07	5340.44	5319.85	5297.35	5273.02	5247.05	5219.69	5191.11	5161.44	5130.72	5099.01	5066.34	5032.76	4998.32	4963.11	4927.25	4890.88	4854.1	4816.96	4779.48	4741.63	4703.4	4664.73	4625.65	4586.16	4546.2	4505.69	4464.58	4422.86	4380.52	4337.56	4293.96	4249.73	4204.88	4159.41	4113.35	4066.71
146	Low variant	Ukraine	14	804	44657.7	44387.7	44106.8	43816.5	43517.8	43211.6	42898	42577.1	42248.3	41911.2	41565.3	41210.7	40848.5	40481	40110.9	39740.4	39370.4	39001.2	38633.2	38266.8	37902.3	37540	37180	36822.3	36466.6	36112.5	35760	35408.8	35058.2	34707.2	34355.1	34001.5	33646.3	33289.1	32929.5	32567.1	32201.8	31833.6	31462.8	31089.7	30714.5	30337.7	29959.2	29579.4	29198.9
147	Low variant	Northern Europe		924	103097	103551	103966	104349	104700	105024	105320	105590	105833	106048	106236	106397	106532	106647	106747	106835	106914	106984	107045	107096	107138	107171	107194	107209	107215	107211	107198	107174	107139	107091	107028	106949	106855	106744	106611	106457	106280	106081	105860	105620	105360	105083	104787	104477	104156
148	Low variant	Channel Islands	15	830	163.758	164.372	164.923	165.426	165.879	166.294	166.667	167.007	167.299	167.563	167.776	167.953	168.093	168.205	168.298	168.365	168.42	168.451	168.472	168.464	168.429	168.36	168.274	168.158	168.006	167.825	167.611	167.361	167.08	166.77	166.421	166.043	165.625	165.184	164.702	164.177	163.61	163.013	162.375	161.718	161.039	160.339	159.618	158.885	158.144
149	Low variant	Denmark		208	5688.69	5703.41	5717.18	5730.08	5742.18	5753.47	5763.94	5773.55	5782.2	5789.8	5796.27	5801.57	5805.75	5808.95	5811.38	5813.16	5814.37	5814.98	5814.93	5814.17	5812.63	5810.33	5807.28	5803.52	5799.07	5793.94	5788.14	5781.68	5774.55	5766.79	5758.43	5749.46	5739.88	5729.65	5718.67	5706.9	5694.35	5681.04	5667.01	5652.31	5636.99	5621.05	5604.58	5587.65	5570.46
150	Low variant	Estonia		233	1315.32	1311.34	1306.75	1301.64	1296.06	1290.08	1283.71	1276.96	1269.85	1262.36	1254.51	1246.3	1237.78	1229.03	1220.16	1211.26	1202.35	1193.44	1184.55	1175.69	1166.87	1158.11	1149.39	1140.7	1132.04	1123.37	1114.68	1105.96	1097.19	1088.31	1079.29	1070.11	1060.76	1051.26	1041.59	1031.74	1021.74	1011.54	1001.21	990.728	980.132	969.427	958.616	947.719	936.754
151	Low variant	Faeroe Islands		234	48.965	49.109	49.232	49.355	49.473	49.57	49.674	49.775	49.865	49.955	50.04	50.12	50.197	50.267	50.34	50.406	50.472	50.537	50.595	50.652	50.687	50.715	50.732	50.739	50.731	50.708	50.674	50.629	50.573	50.5	50.415	50.316	50.203	50.086	49.957	49.807	49.658	49.5	49.339	49.168	48.997	48.819	48.64	48.455	48.276
152	Low variant	Finland	16	246	5481.97	5496.11	5508.69	5519.85	5529.64	5538.1	5545.27	5551.1	5555.56	5558.58	5560.12	5560.17	5558.81	5556.2	5552.53	5548	5542.66	5536.54	5529.6	5521.79	5513.08	5503.48	5493.1	5481.98	5470.25	5457.97	5445.19	5431.94	5418.28	5404.26	5389.96	5375.41	5360.62	5345.56	5330.13	5314.32	5298.1	5281.54	5264.65	5247.48	5230.07	5212.43	5194.57	5176.55	5158.4
153	Low variant	Iceland		352	330.243	332.524	334.664	336.674	338.575	340.36	342.042	343.616	345.086	346.441	347.679	348.81	349.826	350.752	351.6	352.388	353.111	353.763	354.362	354.882	355.321	355.694	355.973	356.172	356.306	356.343	356.302	356.174	355.957	355.655	355.269	354.784	354.215	353.553	352.807	351.959	351.03	350.018	348.932	347.765	346.543	345.261	343.919	342.529	341.099
154	Low variant	Ireland		372	4700.11	4732.56	4763.24	4792.46	4820.46	4847.35	4873.14	4897.79	4921.12	4942.95	4963.13	4981.61	4998.57	5014.41	5029.72	5044.9	5060.09	5075.23	5090.31	5105.23	5119.93	5134.39	5148.59	5162.45	5175.79	5188.48	5200.45	5211.62	5221.85	5230.94	5238.78	5245.29	5250.39	5253.96	5255.83	5255.9	5254.13	5250.54	5245.19	5238.19	5229.62	5219.56	5208.05	5195.24	5181.28
155	Low variant	Isle of Man		833	83.167	83.654	84.106	84.518	84.905	85.273	85.607	85.922	86.22	86.492	86.74	86.959	87.16	87.336	87.513	87.671	87.828	87.989	88.134	88.278	88.396	88.505	88.597	88.683	88.748	88.807	88.854	88.89	88.91	88.914	88.895	88.846	88.775	88.683	88.577	88.45	88.311	88.162	87.997	87.817	87.629	87.429	87.202	86.97	86.731
156	Low variant	Latvia		428	1992.66	1968.23	1944.66	1921.78	1899.46	1877.62	1856.21	1835.28	1814.85	1795.01	1775.83	1757.32	1739.42	1721.92	1704.58	1687.23	1669.79	1652.27	1634.8	1617.5	1600.48	1583.77	1567.28	1551.02	1534.93	1519	1503.21	1487.55	1471.95	1456.34	1440.66	1424.89	1409.03	1393.07	1377.02	1360.88	1344.65	1328.33	1311.95	1295.52	1279.07	1262.6	1246.14	1229.71	1213.34
157	Low variant	Lithuania		440	2931.93	2910.59	2889.74	2869.33	2849.29	2829.53	2809.92	2790.33	2770.56	2750.45	2729.84	2708.67	2686.91	2664.71	2642.24	2619.66	2596.99	2574.22	2551.34	2528.41	2505.41	2482.36	2459.3	2436.2	2413.11	2390.05	2366.98	2343.95	2320.86	2297.68	2274.36	2250.89	2227.26	2203.51	2179.64	2155.67	2131.62	2107.48	2083.31	2059.14	2035.02	2010.96	1987	1963.15	1939.44
158	Low variant	Norway	17	578	5199.84	5242.76	5284.77	5325.94	5366.38	5406.06	5444.98	5483.07	5520.25	5556.39	5591.4	5625.23	5657.93	5689.63	5720.52	5750.74	5780.33	5809.25	5837.42	5864.71	5891	5916.3	5940.62	5963.99	5986.44	6008	6028.65	6048.37	6067.19	6085.19	6102.36	6118.75	6134.31	6148.88	6162.27	6174.35	6185.06	6194.47	6202.6	6209.54	6215.35	6220.04	6223.65	6226.27	6228.01
159	Low variant	Sweden		752	9763.57	9828.34	9888.34	9943.81	9994.96	10042.1	10085.4	10125.1	10161.6	10195	10225.6	10253.7	10279.4	10302.9	10324.4	10343.9	10361.6	10377.8	10392.6	10406.2	10418.8	10430.6	10441.5	10451.9	10461.9	10471.7	10481.2	10490.5	10499.6	10508.2	10516.4	10524.1	10531.3	10537.4	10542.1	10545.1	10546.1	10545.2	10542.5	10537.8	10531.2	10522.8	10512.5	10500.6	10487.2
160	Low variant	United Kingdom		826	65397.1	65727.5	66030	66307.8	66563.1	66798	67013.5	67210.3	67388.4	67547.4	67687.2	67808.3	67912.6	68003	68083.7	68157.6	68226.3	68289.6	68347.9	68400.5	68447.2	68488.2	68523.7	68553.5	68577.4	68595	68605.9	68609.7	68605.3	68591.2	68566.5	68530.6	68483.1	68422.8	68347.9	68257.6	68151.4	68029.8	67893.3	67742.5	67578.6	67401.8	67212.9	67013.7	66806.7
161	Low variant	Southern Europe		925	152441	152150	151796	151387	150929	150429	149892	149324	148728	148109	147470	146815	146145	145464	144774	144077	143374	142666	141952	141228	140494	139748	138990	138219	137432	136628	135806	134964	134101	133213	132300	131360	130393	129397	128370	127311	126220	125098	123948	122771	121570	120348	119105	117846	116576
162	Low variant	Albania		8	2923.35	2924.67	2924.64	2923.34	2920.86	2917.27	2912.59	2906.85	2900.03	2892.12	2883.13	2873.04	2861.91	2849.82	2836.88	2823.16	2808.71	2793.52	2777.54	2760.69	2742.91	2724.22	2704.64	2684.19	2662.9	2640.82	2617.96	2594.36	2570.01	2544.95	2519.23	2492.85	2465.86	2438.34	2410.35	2381.98	2353.25	2324.21	2294.89	2265.32	2235.54	2205.56	2175.43	2145.16	2114.78
163	Low variant	Andorra		20	78.014	77.547	77.179	76.896	76.695	76.553	76.467	76.413	76.385	76.35	76.295	76.214	76.108	75.978	75.821	75.679	75.547	75.407	75.26	75.109	74.954	74.785	74.599	74.423	74.214	73.993	73.752	73.496	73.217	72.905	72.568	72.209	71.82	71.395	70.94	70.455	69.94	69.382	68.797	68.199	67.564	66.906	66.223	65.528	64.82
164	Low variant	Bosnia and Herzegovina		70	3535.96	3524.52	3512.01	3498.55	3484.24	3469.11	3453.24	3436.63	3419.29	3401.22	3382.41	3362.88	3342.66	3321.86	3300.55	3278.82	3256.72	3234.22	3211.28	3187.83	3163.81	3139.21	3114.07	3088.39	3062.22	3035.56	3008.45	2980.89	2952.9	2924.49	2895.67	2866.5	2836.98	2807.16	2777.09	2746.82	2716.37	2685.77	2655.06	2624.29	2593.49	2562.68	2531.88	2501.09	2470.3
165	Low variant	Croatia		191	4236.02	4206.88	4176.87	4146.21	4115.06	4083.54	4051.74	4019.73	3987.55	3955.22	3922.75	3890.19	3857.57	3825	3792.61	3760.47	3728.64	3697.07	3665.66	3634.26	3602.75	3571.08	3539.27	3507.34	3475.31	3443.23	3411.07	3378.8	3346.38	3313.77	3280.89	3247.76	3214.37	3180.7	3146.73	3112.46	3077.88	3043.01	3007.9	2972.56	2937.04	2901.37	2865.55	2829.67	2793.75
166	Low variant	Gibraltar		292	34.228	34.38	34.504	34.602	34.686	34.736	34.786	34.813	34.824	34.832	34.822	34.811	34.791	34.763	34.734	34.707	34.673	34.638	34.605	34.565	34.53	34.48	34.443	34.393	34.35	34.299	34.249	34.199	34.139	34.068	34.011	33.941	33.857	33.776	33.688	33.59	33.48	33.375	33.253	33.137	33.013	32.868	32.735	32.579	32.427
167	Low variant	Greece		300	11217.8	11188.5	11153.1	11112.4	11067.2	11018.3	10966.4	10911.9	10855.4	10797.1	10737.6	10677	10615.8	10554.2	10492.7	10431.5	10370.8	10310.5	10250.5	10190.3	10129.8	10068.7	10007	9944.52	9880.95	9816.06	9749.71	9681.74	9611.91	9539.91	9465.5	9388.59	9309.17	9227.13	9142.46	9055.16	8965.27	8872.85	8778.12	8681.29	8582.62	8482.25	8380.35	8277.29	8173.42
168	Low variant	Holy See	18	336	0.803	0.8	0.793	0.8	0.796	0.797	0.795	0.791	0.787	0.796	0.788	0.785	0.786	0.785	0.779	0.774	0.778	0.779	0.773	0.769	0.764	0.763	0.773	0.767	0.768	0.762	0.758	0.757	0.757	0.762	0.761	0.756	0.756	0.753	0.749	0.755	0.754	0.747	0.746	0.743	0.741	0.747	0.747	0.745	0.741
169	Low variant	Italy		380	59504.2	59389.7	59252.2	59094.3	58918.6	58727.4	58522.9	58307.2	58082.1	57849.3	57610.3	57366.3	57118.3	56867.2	56613.3	56357.2	56099.3	55839.8	55578.2	55313.7	55045.8	54774.1	54498.4	54218.1	53932.3	53640.3	53341.7	53035.9	52722.3	52399.9	52068.1	51726.6	51375.3	51013.3	50640	50254.7	49857.7	49449.4	49030.8	48602.8	48166.7	47723.1	47273.3	46818.9	46362.1
170	Low variant	Malta		470	427.616	428.515	429.285	429.917	430.408	430.742	430.92	430.922	430.741	430.378	429.813	429.055	428.105	426.978	425.674	424.217	422.61	420.874	419.003	417.041	414.978	412.849	410.653	408.396	406.085	403.743	401.367	398.956	396.529	394.081	391.617	389.141	386.664	384.156	381.637	379.086	376.511	373.91	371.275	368.609	365.916	363.185	360.408	357.599	354.753
171	Low variant	Montenegro		499	628.178	627.938	627.373	626.526	625.44	624.119	622.597	620.892	619.005	616.945	614.715	612.33	609.799	607.152	604.409	601.591	598.711	595.767	592.755	589.648	586.439	583.116	579.695	576.175	572.538	568.804	564.97	561.024	556.971	552.827	548.591	544.252	539.827	535.321	530.741	526.086	521.37	516.588	511.747	506.862	501.925	496.95	491.939	486.889	481.803
172	Low variant	Portugal		620	10418.5	10363.3	10307.7	10251.9	10196.1	10140.2	10084.2	10027.9	9971.09	9913.44	9854.68	9794.71	9733.6	9671.68	9609.43	9547.18	9485.02	9422.8	9360.38	9297.52	9234.05	9169.89	9105.01	9039.27	8972.53	8904.63	8835.5	8765.05	8693.2	8619.88	8545	8468.55	8390.49	8310.72	8229.11	8145.62	8060.26	7973.11	7884.35	7794.2	7702.87	7610.48	7517.15	7423.11	7328.6
173	Low variant	San Marino		674	32.96	33.129	33.271	33.374	33.463	33.531	33.577	33.609	33.623	33.63	33.625	33.61	33.592	33.566	33.534	33.491	33.451	33.406	33.355	33.3	33.24	33.175	33.1	33.027	32.942	32.848	32.755	32.652	32.541	32.424	32.308	32.173	32.041	31.89	31.738	31.584	31.408	31.237	31.058	30.865	30.676	30.482	30.285	30.083	29.872
174	Low variant	Serbia	19	688	8851.28	8812.83	8771.52	8727.65	8681.49	8633.22	8582.97	8530.83	8476.79	8420.83	8362.93	8303.15	8241.68	8178.81	8114.95	8050.4	7985.32	7919.72	7853.55	7786.68	7719.03	7650.62	7581.56	7511.93	7441.87	7371.45	7300.71	7229.67	7158.33	7086.69	7014.73	6942.49	6869.96	6797.14	6723.99	6650.49	6576.67	6502.52	6428.01	6353.15	6277.92	6202.31	6126.39	6050.18	5973.75
175	Low variant	Slovenia		705	2074.79	2075.16	2074.37	2072.56	2069.83	2066.25	2061.9	2056.83	2051.07	2044.66	2037.62	2029.98	2021.82	2013.23	2004.3	1995.13	1985.78	1976.23	1966.5	1956.58	1946.46	1936.15	1925.64	1914.95	1904.05	1892.92	1881.57	1870	1858.15	1846.02	1833.57	1820.79	1807.68	1794.25	1780.46	1766.32	1751.83	1737.01	1721.88	1706.49	1690.9	1675.1	1659.13	1643.03	1626.81
176	Low variant	Spain	20	724	46397.7	46382.9	46343.5	46282.1	46201.4	46104	45992.2	45868.5	45735.1	45594.2	45447.6	45296.8	45142.8	44986.2	44826.9	44665.1	44501.1	44335.2	44167.2	43996.5	43822.7	43645.3	43464.2	43278.7	43087.8	42890.9	42687.3	42476.6	42257.7	42029.5	41791.2	41542.3	41282.4	41010.6	40726	40427.7	40115.7	39790.4	39452.1	39101.8	38740.2	38368	37985.8	37594.9	37197
177	Low variant	TFYR Macedonia	21	807	2079.31	2078.92	2077.67	2075.62	2072.82	2069.31	2065.13	2060.24	2054.67	2048.39	2041.41	2033.7	2025.34	2016.38	2006.93	1997.07	1986.84	1976.25	1965.27	1953.9	1942.12	1929.93	1917.37	1904.44	1891.22	1877.72	1863.93	1849.89	1835.57	1820.99	1806.13	1791.01	1775.64	1760	1744.1	1727.93	1711.49	1694.81	1677.86	1660.68	1643.26	1625.59	1607.7	1589.62	1571.37
178	Low variant	Western Europe		926	192032	192626	193077	193403	193617	193733	193766	193728	193628	193479	193288	193063	192811	192536	192243	191934	191612	191280	190934	190570	190184	189775	189345	188890	188408	187898	187358	186787	186185	185548	184876	184168	183426	182647	181833	180982	180096	179177	178229	177257	176266	175256	174233	173200	172164
179	Low variant	Austria		40	8678.66	8689.11	8697.58	8704.18	8708.96	8711.98	8713.22	8712.6	8710.08	8705.54	8698.91	8690.15	8679.36	8666.74	8652.58	8637.07	8620.31	8602.28	8583.03	8562.55	8540.86	8517.94	8493.83	8468.57	8442.21	8414.76	8386.23	8356.53	8325.56	8293.13	8259.09	8223.44	8186.16	8147.08	8105.99	8062.74	8017.35	7969.94	7920.69	7869.86	7817.7	7764.32	7709.85	7654.63	7599.07
180	Low variant	Belgium		56	11287.9	11359.1	11417.5	11464.5	11501.4	11529.6	11550.3	11565.1	11575.2	11582	11586.6	11590	11592.6	11594.5	11595.5	11595.3	11594.2	11592.4	11589.9	11586.4	11581.8	11576	11569	11560.7	11550.9	11539.6	11526.8	11512.2	11495.8	11477.5	11457	11434.5	11409.8	11382.9	11353.7	11322.1	11288.2	11252.1	11213.9	11173.9	11132.4	11089.4	11045.1	10999.8	10953.6
181	Low variant	France		250	64457.2	64663.5	64841.2	64994.5	65126.9	65241.2	65339.7	65423.7	65494.2	65551.6	65596.2	65628.8	65651	65665.1	65674.2	65680.3	65684.4	65685.9	65683.2	65673.8	65655.6	65628.2	65591.5	65544.5	65486.1	65415.4	65331.8	65235.2	65125.5	65002.4	64866.1	64716.6	64554.2	64379.3	64192.9	63995.8	63788.5	63571.5	63345.6	63111.5	62870	62621.8	62367.6	62108.7	61846.6
182	Low variant	Germany		276	81707.8	81908.7	82021.3	82055	82019.1	81922.8	81775.3	81585.8	81363.2	81116	80851.9	80576.7	80294.4	80006.1	79711.6	79410.8	79105.5	78797.7	78486.8	78171.6	77851	77525.1	77193.6	76855.8	76510.2	76155.7	75791.9	75418.2	75033.3	74635.8	74224.4	73799.2	73360.2	72906.6	72437.8	71953.7	71454.5	70941.5	70417.1	69884.1	69345.4	68802.1	68255.5	67708.3	67164
183	Low variant	Liechtenstein		438	37.403	37.609	37.812	37.998	38.182	38.355	38.516	38.672	38.82	38.95	39.076	39.193	39.29	39.389	39.475	39.549	39.622	39.679	39.734	39.775	39.811	39.832	39.857	39.851	39.847	39.831	39.814	39.778	39.736	39.685	39.626	39.564	39.492	39.408	39.327	39.225	39.121	39.008	38.897	38.769	38.638	38.502	38.372	38.229	38.085
184	Low variant	Luxembourg		442	566.741	573.305	579.737	586.095	592.415	598.71	604.942	611.055	616.976	622.615	627.897	632.785	637.314	641.593	645.78	649.994	654.264	658.566	662.873	667.129	671.293	675.372	679.369	683.276	687.105	690.835	694.46	697.976	701.39	704.684	707.89	710.985	713.954	716.8	719.474	721.977	724.283	726.415	728.368	730.155	731.795	733.284	734.63	735.851	736.969
185	Low variant	Monaco		492	38.307	38.478	38.641	38.797	38.939	39.07	39.2	39.324	39.448	39.553	39.673	39.784	39.885	39.985	40.094	40.198	40.3	40.41	40.52	40.631	40.723	40.821	40.91	40.997	41.085	41.163	41.243	41.32	41.397	41.48	41.56	41.645	41.735	41.829	41.923	42.012	42.097	42.179	42.267	42.345	42.424	42.498	42.572	42.644	42.705
186	Low variant	Netherlands		528	16938.5	16968.7	16994.8	17017.3	17036.4	17052.3	17064.8	17073.9	17079.3	17080.4	17077.1	17069.1	17056.6	17040.2	17020.7	16998.5	16973.8	16946.6	16916.4	16882.8	16845.5	16804.2	16759.3	16710.6	16658.3	16602.5	16543.1	16480.1	16413.7	16344	16271	16194.8	16115.6	16033.5	15948.3	15860.3	15769.5	15676.3	15580.9	15483.6	15384.9	15284.9	15183.8	15082.2	14980.4
187	Low variant	Switzerland		756	8319.77	8387.49	8448.77	8504.17	8554.24	8599.48	8640.42	8677.53	8711.28	8742.09	8770.35	8796.4	8820.48	8842.77	8863.38	8882.41	8900.03	8916.37	8931.4	8945.02	8957.19	8967.9	8977.23	8985.29	8992.14	8997.9	9002.54	9005.99	9008.24	9009.26	9009	9007.47	9004.57	8999.97	8993.21	8984.01	8972.27	8958.09	8941.57	8922.89	8902.23	8879.63	8855.21	8829.26	8802.17
188	Low variant	LATIN AMERICA AND THE CARIBBEAN		904	632381	638216	643666	648771	653561	658060	662282	666238	669927	673347	676497	679382	682017	684435	686675	688764	690716	692528	694188	695676	696979	698093	699023	699762	700304	700646	700784	700716	700439	699950	699246	698327	697193	695846	694287	692521	690548	688371	685995	683424	680665	677720	674594	671292	667823
189	Low variant	Caribbean		915	43309.6	43541.8	43752.8	43944.4	44118.1	44275.2	44416.5	44542.3	44653.1	44748.8	44829.5	44895.4	44947.3	44986.4	45014.5	45032.4	45040.8	45039.5	45027.9	45005.1	44970.2	44923.2	44864	44792.1	44707.3	44608.9	44497	44371.4	44231.5	44076.8	43907	43722	43522	43307.5	43079.1	42837.5	42582.9	42315.6	42036.2	41745.1	41442.9	41130	40806.9	40474.3	40132.9
190	Low variant	Anguilla		660	14.611	14.771	14.887	14.99	15.08	15.143	15.195	15.23	15.25	15.266	15.281	15.28	15.285	15.273	15.269	15.243	15.224	15.196	15.166	15.136	15.099	15.05	15.004	14.949	14.892	14.82	14.759	14.681	14.604	14.523	14.442	14.348	14.249	14.148	14.048	13.94	13.83	13.713	13.596	13.475	13.352	13.227	13.1	12.966	12.838
191	Low variant	Antigua and Barbuda		28	99.923	100.835	101.712	102.546	103.339	104.112	104.845	105.55	106.216	106.856	107.444	108.005	108.521	109.012	109.477	109.902	110.32	110.707	111.065	111.39	111.68	111.938	112.162	112.346	112.488	112.597	112.652	112.679	112.655	112.585	112.487	112.33	112.138	111.907	111.639	111.333	110.987	110.609	110.199	109.764	109.304	108.821	108.322	107.806	107.263
192	Low variant	Aruba		533	104.341	104.696	104.992	105.246	105.458	105.64	105.771	105.874	105.939	105.966	105.968	105.924	105.853	105.747	105.618	105.459	105.262	105.053	104.805	104.524	104.202	103.851	103.457	103.025	102.56	102.057	101.516	100.95	100.351	99.72	99.065	98.389	97.693	96.974	96.258	95.52	94.795	94.055	93.318	92.591	91.873	91.154	90.452	89.753	89.07
[truncated: 81 more rows]
[truncated: 41 more columns]

## Sheet: CONSTANT-FERTILITY
United Nations
Population Division
Department of Economic and Social Affairs
World Population Prospects: The 2017 Revision
[truncated: 280 more rows]
[truncated: 41 more columns]

## Sheet: INSTANT-REPLACEMENT
United Nations
Population Division
[truncated: 282 more rows]
[truncated: 41 more columns]

## Sheet: MOMENTUM
United Nations
Population Division
[truncated: 282 more rows]
[truncated: 41 more columns]

## Sheet: ZERO-MIGRATION
United Nations
[truncated: 283 more rows]
[truncated: 41 more columns]

[truncated: 3 more sheets: CONSTANT-MORTALITY, NO CHANGE, NOTES]
